# Supplementary material for: A crosstalk between hepcidin and IRE/IRP pathways controls ferroportin expression and determines serum iron levels in mice
Source: eLife. 2022 Sep 6;11:e81332. doi: 10.7554/eLife.81332 (PMC9499557; doi:10.7554/eLife.81332)
Supplement: Figure 1—source data 1. [file elife-81332-fig1-data1.xlsx]

## Sheet: 807 808
807 808	Liver	Figure 1.S1F
Hep/RPL 19	Efficiency target	Target Ct 1	Target Ct 2	Target Ct	Delta Ct target	Numerator	Efficiency refer.	Refer. Ct 1	Refer. Ct 2	Refer. Ct	Delta Ct refer.	Denominator	Fold Induction	Hep/RPL19
807 1	2	14.8973	14.8558	14.8765	0.118265	1.08543	2	17.6312	17.6278	17.6295	0.0420641	1.02959	1.05424	WT ND CT
807 2	2	14.3245	14.4897	14.4071	0.587735	1.50289	2	17.8717	17.8639	17.8678	-0.196189	0.872854	1.72181	WT ND CT
807 3	2	15.4279	15.3124	15.3701	-0.375311	0.770939	2	17.6634	17.6127	17.638	0.0335526	1.02353	0.753216	WT ND CT
807 4	2	14.912	14.8315	14.8718	0.123031	1.08902	2	17.556	17.8021	17.679	-0.00745637	0.994845	1.09466	WT ND CT
808 1	2	14.9708	14.9934	14.9821	0.0127329	1.00886	2	17.6839	17.7096	17.6967	-0.0251165	0.982741	1.02658	WT ND CT
808 2	2	15.2136	15.2066	15.2101	-0.215268	0.861386	2	17.5248	17.5363	17.5305	0.141061	1.10272	0.78115	WT ND CT
808 3	2	15.2227	15.2693	15.246	-0.251185	0.840206	2	17.6954	17.6236	17.6595	0.0120835	1.00841	0.833198	WT ND CT
808 24	2	13.6339	13.5566	13.5952	1.39957	2.63823	2	17.6266	17.5502	17.5884	0.0831875	1.05936	2.49041	WT ND LPS
808 25	2	14.1422	13.9795	14.0609	0.933921	1.91046	2	17.5659	17.5813	17.5736	0.0979761	1.07027	1.78503	WT ND LPS
808 31	2	13.5954	13.4859	13.5406	1.45417	2.73999	2	17.642	17.6488	17.6454	0.0261807	1.01831	2.69071	WT ND LPS
808 32	2	13.8855	13.7411	13.8133	1.18147	2.26808	2	17.5973	17.5113	17.5543	0.117284	1.08469	2.09099	WT ND LPS
808 33	2	13.492	13.3695	13.4308	1.56404	2.95681	2	17.0269	16.9616	16.9942	0.67735	1.5992	1.84893	WT CID 1d
808 34	2	13.1607	13.1226	13.1416	1.85315	3.61288	2	16.9997	16.914	16.9569	0.714713	1.64116	2.20143	WT CID 1d
808 35	2	12.953	13.1923	13.0726	1.92219	3.78997	2	16.9087	16.8598	16.8842	0.787381	1.72594	2.19589	WT CID 1d
808 36	2	13.3005	13.3615	13.331	1.66379	3.16848	2	16.9108	16.9048	16.9078	0.763794	1.69795	1.86606	WT CID 1d
808 37	2	13.6386	13.4419	13.5403	1.45452	2.74065	2	17.1725	17.1855	17.179	0.492613	1.40699	1.94788	WT CID 1d
808 38	2	13.1792	13.2514	13.2153	1.77952	3.43312	2	16.9072	16.9679	16.9375	0.734084	1.66334	2.06399	WT CID 1d
808 50	2	12.5889	12.7049	12.6469	2.34793	5.09092	2	17.3057	17.3248	17.3152	0.35635	1.28018	3.97671	WT CID 1d LPS
808 55	2	13.4686	13.5581	13.5134	1.48144	2.79227	2	17.6093	17.6523	17.6308	0.04077	1.02866	2.71446	WT CID 1d LPS
808 56	2	12.7688	12.7692	12.769	2.22582	4.67775	2	17.2759	17.2891	17.2825	0.389077	1.30955	3.57202	WT CID 1d LPS
808 57	2	12.7559	12.7677	12.7618	2.23296	4.70098	2	17.2126	17.2374	17.225	0.44657	1.3628	3.44951	WT CID 1d LPS
808 58	2	12.9711	12.9383	12.9547	2.04013	4.11282	2	17.5988	17.542	17.5704	0.10119	1.07266	3.83423	WT CID 1d LPS
808 59	2	12.6452	12.4794	12.5623	2.4325	5.39827	2	17.4365	17.4032	17.4199	0.251718	1.19062	4.53399	WT CID 1d LPS
808 60	2	12.5443	12.7183	12.6313	2.3635	5.14619	2	17.2861	17.3451	17.3156	0.355986	1.27986	4.0209	WT CID 1d LPS
808 39	2	12.8703	12.8455	12.8579	2.13685	4.398	2	16.9291	16.858	16.8936	0.778035	1.71479	2.56474	WT CID 1w
808 40	2	13.1875	13.2231	13.2053	1.78954	3.45704	2	16.9016	17.1462	17.0239	0.647715	1.56668	2.2066	WT CID 1w
808 41	2	12.6499	12.7323	12.6911	2.30366	4.93709	2	16.8622	16.8837	16.8729	0.798662	1.73949	2.83824	WT CID 1w
808 42	2	12.9484	12.8675	12.9079	2.08686	4.24822	2	16.7328	16.7491	16.741	0.93061	1.90608	2.22877	WT CID 1w
808 43	2	12.6696	12.6275	12.6486	2.34624	5.08499	2	16.8703	16.8216	16.8459	0.825648	1.77233	2.8691	WT CID 1w
808 44	2	12.6585	12.4113	12.5349	2.45989	5.50176	2	17.3139	17.2781	17.296	0.375616	1.29739	4.24063	WT CID 1w LPS
808 45	2	12.413	12.4915	12.4522	2.54259	5.82635	2	17.336	17.2891	17.3126	0.358993	1.28253	4.54286	WT CID 1w LPS
808 46	2	12.9969	13.0226	13.0098	1.98502	3.95867	2	17.356	17.3678	17.3619	0.309663	1.23942	3.19397	WT CID 1w LPS
808 47	2	12.7227	12.7673	12.745	2.24981	4.75621	2	17.3879	17.6047	17.4963	0.175289	1.12919	4.21206	WT CID 1w LPS
808 48	2	12.7383	12.3782	12.5583	2.43655	5.41345	2	17.3642	17.4212	17.3927	0.278895	1.21327	4.46188	WT CID 1w LPS
808 49	2	12.1293	12.1808	12.155	2.83976	7.15901	2	16.9831	17.1276	17.0553	0.616247	1.53288	4.67029	WT CID 1w LPS
807 58	2	12.7066	12.7592	12.7329	2.2619	4.79623	2	16.9764	17.1135	17.045	0.626635	1.54396	3.10644	WT CID 5w
807 59	2	12.3143	12.3275	12.3209	2.67387	6.3814	2	16.7161	16.7955	16.7558	0.915816	1.88664	3.38242	WT CID 5w
808 60	2	12.3734	12.4272	12.4003	2.59452	6.0399	2	16.7307	16.7676	16.7492	0.922429	1.8953	3.18677	WT CID 5w
808 61	2	12.2936	12.3441	12.3189	2.67594	6.39056	2	16.6796	16.661	16.6703	1.00129	2.00179	3.19242	WT CID 5w
808 26	2	11.9824	12.0204	12.0014	2.99338	7.96336	2	17.0048	17.1529	17.0789	0.592735	1.5081	5.28038	WT CID 5w LPS
808 27	2	12.2499	12.1924	12.2211	2.77366	6.83839	2	17.3135	17.348	17.3307	0.340867	1.26652	5.39937	WT CID 5w LPS
808 28	2	12.1438	12.1521	12.1479	2.84687	7.1944	2	17.3163	17.3993	17.3578	0.313775	1.24296	5.78814	WT CID 5w LPS
808 29	2	12.0067	12.0067	12.0067	2.98813	7.93445	2	17.3018	17.2685	17.2851	0.386464	1.30719	6.06987	WT CID 5w LPS
808 30	2	11.6438	11.6438	11.6438	3.35096	10.2033	2	17.1564	17.1136	17.135	0.536593	1.45054	7.03413	WT CID 5w LPS
				14.9948						17.6716
				28.6722						31.2143
