# Supplementary material for: A crosstalk between hepcidin and IRE/IRP pathways controls ferroportin expression and determines serum iron levels in mice
Source: eLife. 2022 Sep 6;11:e81332. doi: 10.7554/eLife.81332 (PMC9499557; doi:10.7554/eLife.81332)
Supplement: Figure 1—source data 4. [file elife-81332-fig1-data4.xlsx]

## Sheet: 809 Serum
808 Serum		5 weeks of diet
LPS Injection 1mg/g
	Fe	mean	st				saturation	mean	st	Ferritin	mean	st	ID
WT ND PBS	36	36.375	4.89716				51	54.5	5.97614	126	119.5	16.4491
	40						56			127
	40						52			137
	35						54			143
	44						67			106
	30						49			96
	30						49			115
	36						58			106
WT ND LPS	14	15.5833	2.57714				23	24.6667	3.14113	126	130.833	37.199
	14						23			113
	19.5						28			203
	13						21			132
	18						29			99
	15						24			112
WT CID 1d PBS	61	57.6667	3.38625				95	90.1667	6.17792	132	125.333	8.4301
	52						80			138
	58						95			117
	61						86			117
	58						95			126
	56						90			122
WT CID 1d LPS	38	27.8571	6.56832				54	46.7143	11.1313	175	152	39.766
	19						32			133
	31						53			194
	21						34			112
	26						47			121
	28						44			209
	32						63			120
WT CID 1w PBS	51	51.4	1.81659				91	90.4	3.1305	138	158.4	16.3187
	51						85			183
	54						93			154
	49						92			155
	52						91			162
WT CID 1w LPS	34	33.0833	4.27103				55	52.1667	7.41395	222	241	45.6596
	28.5						40			212
	31						51			208
	32						52			224
	32						52			251
	41						63			329
WT CID 5w PBS	53	51.1667	6.70572				85	88.8333	3.3116	220	214.167	53.1692
	63						86			316
	49						91			181
	51						89			207
	48						94			193
	43						88			168
WT CID 5w LPS	51	41.2	7.0852				74	70.2	8.92749	347	272	67.9117
	46						84			342
	35						67			199
	39						63			235
	35						63			237
