# Supplementary material for: A crosstalk between hepcidin and IRE/IRP pathways controls ferroportin expression and determines serum iron levels in mice
Source: eLife. 2022 Sep 6;11:e81332. doi: 10.7554/eLife.81332 (PMC9499557; doi:10.7554/eLife.81332)
Supplement: Figure 2—source data 1. [file elife-81332-fig2-data1.xlsx]

## Sheet: 807 808
807 808	Liver	Fig 1.G
Hep/RPL 19	Efficiency target	Target Ct 1	Target Ct 2	Target Ct	Delta Ct target	Numerator	Efficiency refer.	Refer. Ct 1	Refer. Ct 2	Refer. Ct	Delta Ct refer.	Denominator	Fold Induction	Hep/RPL19
807 1	2	14.4187	14.3792	14.399	0.19619	1.14567	2	17.1259	17.1166	17.1212	0.186037	1.13763	1.00706	WT ND CT
807 2	2	13.8784	13.8193	13.8488	0.746339	1.67753	2	17.6136	17.3261	17.4699	-0.162567	0.893434	1.87762	WT ND CT
807 3	2	14.8789	14.8201	14.8495	-0.254344	0.838369	2	17.3264	17.0022	17.1643	0.143008	1.10421	0.759251	WT ND CT
807 4	2	14.6908	14.6946	14.6927	-0.097528	0.934633	2	17.2685	17.3213	17.2949	0.0123749	1.00861	0.92665	WT ND CT
808 1	2	14.5819	14.66	14.6209	-0.0257707	0.982296	2	17.2325	17.2154	17.2239	0.0833654	1.05949	0.927143	WT ND CT
808 2	2	14.8705	14.8963	14.8834	-0.288239	0.818901	2	17.3877	17.4467	17.4172	-0.109962	0.926612	0.883758	WT ND CT
808 3	2	14.9131	14.8305	14.8718	-0.276648	0.825507	2	17.5504	17.3687	17.4595	-0.152256	0.899842	0.917391	WT ND CT
808 24	2	13.4867	13.5449	13.5158	1.07938	2.11313	2	17.3879	17.4771	17.4325	-0.125213	0.916869	2.30472	WT ND LPS
808 25	2	13.7943	13.8612	13.8278	0.767409	1.70221	2	17.4209	17.3302	17.3755	-0.068224	0.953811	1.78464	WT ND LPS
808 31	2	13.1794	13.3166	13.248	1.34716	2.5441	2	17.5733	17.4374	17.5054	-0.198073	0.871714	2.9185	WT ND LPS
808 32	2	13.5286	13.5386	13.5336	1.06157	2.0872	2	17.3693	17.3419	17.3556	-0.0482855	0.967085	2.15824	WT ND LPS
807 58	2	12.6971	12.7837	12.7404	1.85476	3.61691	2	17.2036	17.3365	17.27	0.0372343	1.02614	3.52476	WT CID CT
807 59	2	12.3221	12.2383	12.2802	2.31498	4.97599	2	16.9883	16.7782	16.8832	0.424034	1.34167	3.70879	WT CID CT
807 60	2	12.4545	12.4901	12.4723	2.12282	4.35545	2	16.8229	16.8537	16.8383	0.469002	1.38415	3.14666	WT CID CT
807 61	2	12.2041	12.2531	12.2286	2.36655	5.15705	2	16.6985	16.8066	16.7526	0.554726	1.46889	3.51085	WT CID CT
808 26	2	12.1028	12.1529	12.1279	2.4673	5.5301	2	17.2123	17.2288	17.2206	0.086731	1.06196	5.20744	WT CID LPS
808 27	2	12.1621	12.2218	12.192	2.40321	5.28977	2	17.3255	17.3199	17.3227	-0.0153952	0.989386	5.34652	WT CID LPS
808 28	2	12.013	11.977	11.995	2.60013	6.06342	2	17.3247	17.3238	17.3243	-0.0169735	0.988304	6.13518	WT CID LPS
808 29	2	12.1371	12.112	12.1245	2.47063	5.54284	2	17.3972	17.341	17.3691	-0.0617924	0.958073	5.78541	WT CID LPS
808 30	2	11.9468	11.9223	11.9346	2.6606	6.32297	2	17.1783	17.1778	17.1781	0.129232	1.09371	5.7812	WT CID LPS
807 5	2	15.8636	15.7908	15.8272	-1.23205	0.425711	2	17.3291	17.4693	17.3992	-0.0919399	0.93826	0.453724	KO ND CT
807 6	2	15.4969	15.3818	15.4393	-0.844189	0.557024	2	17.4494	17.2248	17.3371	-0.0298071	0.979551	0.568652	KO ND CT
807 7	2	15.2284	15.3593	15.2939	-0.698728	0.616115	2	17.0232	17.0427	17.0329	0.274337	1.20944	0.509423	KO ND CT
807 8	2	17.1443	17.2065	17.1754	-2.58022	0.167215	2	17.2447	17.2571	17.2509	0.0563526	1.03983	0.16081	KO ND CT
807 9	2	15.4867	15.5592	15.523	-0.927833	0.525647	2	16.9777	16.9146	16.9461	0.361163	1.28446	0.409236	KO ND CT
807 10	2	17.8302	17.8973	17.8638	-3.26862	0.103764	2	17.5566	17.5434	17.55	-0.242755	0.84513	0.122779	KO ND CT
808 4	2	15.4189	15.6499	15.5344	-0.939253	0.521503	2	17.0098	16.9601	16.985	0.32232	1.25034	0.417089	KO ND CT
808 5	2	16.6739	16.561	16.6175	-2.02229	0.246167	2	16.8825	16.8844	16.8834	0.42386	1.34151	0.1835	KO ND CT
808 6	2	18.6839	18.6427	18.6633	-4.06814	0.0596167	2	17.7002	17.6576	17.6789	-0.371611	0.772919	0.0771318	KO ND CT
808 7	2	15.423	14.9669	15.195	-0.599807	0.659842	2	17.2129	17.2042	17.2086	0.0987234	1.07083	0.6162	KO ND CT
808 8	2	15.3592	15.3173	15.3382	-0.743088	0.597459	2	17.1482	16.9911	17.0697	0.237607	1.17904	0.506736	KO ND CT
808 9	2	13.5523	13.5499	13.5511	1.04409	2.06207	2	17.1779	17.0021	17.09	0.217319	1.16257	1.77372	KO ND LPS
808 10	2	14.5424	14.6576	14.6	-0.00484473	0.996648	2	17.2085	17.2401	17.2243	0.0829821	1.05921	0.940939	KO ND LPS
808 11	2	13.7477	13.8174	13.7826	0.812564	1.75633	2	17.3413	17.6109	17.4761	-0.168833	0.889562	1.97438	KO ND LPS
808 12	2	14.4765	14.5384	14.5074	0.0877227	1.06269	2	17.3059	17.3059	17.3059	0.00136089	1.00094	1.06169	KO ND LPS
808 13	2	13.6019	13.5763	13.5891	1.00606	2.00842	2	17.1821	17.3584	17.2703	0.0370264	1.026	1.95753	KO ND LPS
808 14	2	13.794	13.3313	13.5627	1.03249	2.04556	2	16.946	16.988	16.967	0.340281	1.266	1.61576	KO ND LPS
807 21	2	24.7122	24.7002	24.7062	-10.111	0.000904238	2	16.8271	16.9978	16.9125	0.394821	1.31478	0.000687749	KO IDD CT
807 22	2	24.9656	25.2767	25.1211	-10.526	0.000678209	2	16.7522	16.5805	16.6664	0.640908	1.55931	0.000434942	KO IDD CT
807 23	2	23.7076	23.5515	23.6296	-9.0344	0.0019071	2	16.9779	16.9507	16.9643	0.342957	1.26835	0.0015036	KO IDD CT
807 34	2	26.2841	26.2748	26.2795	-11.6843	0.000303863	2	16.8772	16.9517	16.9144	0.392853	1.31299	0.000231429	KO IDD CT
807 35	2	24.8684	25.1877	25.028	-10.4329	0.000723427	2	16.9631	17.1378	17.0504	0.25686	1.19488	0.000605441	KO IDD CT
808 15	2	23.6298	23.8187	23.7243	-9.1291	0.00178594	2	17.5199	17.6084	17.5642	-0.256882	0.836895	0.00213401	KO IDD CT
808 16	2	25.3771	25.6153	25.4962	-10.901	0.000522961	2	17.16	17.1586	17.1593	0.147991	1.10803	0.000471976	KO IDD CT
808 17	2	16.9995	16.8393	16.9194	-2.32424	0.199679	2	17.2918	17.354	17.3229	-0.0156364	0.98922	0.201855	KO IDD LPS
808 18	2	16.8095	16.9619	16.8857	-2.29051	0.204403	2	17.2623	17.2513	17.2568	0.0504894	1.03562	0.197373	KO IDD LPS
808 19	2	17.3459	17.4141	17.38	-2.78483	0.145105	2	17.297	17.3021	17.2995	0.00775623	1.00539	0.144327	KO IDD LPS
808 20	2	18.3546	18.2939	18.3243	-3.72912	0.0754092	2	17.6735	17.6504	17.6619	-0.354655	0.782056	0.0964243	KO IDD LPS
808 21	2	16.384	16.3915	16.3878	-1.79263	0.288645	2	17.1797	17.1958	17.1878	0.119494	1.08635		KO IDD LPS
808 22	2	15.4965	15.5566	15.5265	-0.931378	0.524357	2	16.7462	16.9165	16.8314	0.475895	1.39078		KO IDD LPS
808 23	2	16.2773	16.3521	16.3147	-1.7195	0.303654	2	17.0019	17.1509	17.0764	0.230893	1.17356		KO IDD LPS
				14.5952						17.3073
				26.9481						31.2859
807 808	Liver	Figure 1.S1F
Hep/RPL 19	Efficiency target	Target Ct 1	Target Ct 2	Target Ct	Delta Ct target	Numerator	Efficiency refer.	Refer. Ct 1	Refer. Ct 2	Refer. Ct	Delta Ct refer.	Denominator	Fold Induction	Hep/RPL19
807 1	2	14.8973	14.8558	14.8765	0.118265	1.08543	2	17.6312	17.6278	17.6295	0.0420641	1.02959	1.05424	WT ND CT
807 2	2	14.3245	14.4897	14.4071	0.587735	1.50289	2	17.8717	17.8639	17.8678	-0.196189	0.872854	1.72181	WT ND CT
807 3	2	15.4279	15.3124	15.3701	-0.375311	0.770939	2	17.6634	17.6127	17.638	0.0335526	1.02353	0.753216	WT ND CT
807 4	2	14.912	14.8315	14.8718	0.123031	1.08902	2	17.556	17.8021	17.679	-0.00745637	0.994845	1.09466	WT ND CT
808 1	2	14.9708	14.9934	14.9821	0.0127329	1.00886	2	17.6839	17.7096	17.6967	-0.0251165	0.982741	1.02658	WT ND CT
808 2	2	15.2136	15.2066	15.2101	-0.215268	0.861386	2	17.5248	17.5363	17.5305	0.141061	1.10272	0.78115	WT ND CT
808 3	2	15.2227	15.2693	15.246	-0.251185	0.840206	2	17.6954	17.6236	17.6595	0.0120835	1.00841	0.833198	WT ND CT
808 24	2	13.6339	13.5566	13.5952	1.39957	2.63823	2	17.6266	17.5502	17.5884	0.0831875	1.05936	2.49041	WT ND LPS
808 25	2	14.1422	13.9795	14.0609	0.933921	1.91046	2	17.5659	17.5813	17.5736	0.0979761	1.07027	1.78503	WT ND LPS
808 31	2	13.5954	13.4859	13.5406	1.45417	2.73999	2	17.642	17.6488	17.6454	0.0261807	1.01831	2.69071	WT ND LPS
808 32	2	13.8855	13.7411	13.8133	1.18147	2.26808	2	17.5973	17.5113	17.5543	0.117284	1.08469	2.09099	WT ND LPS
808 33	2	13.492	13.3695	13.4308	1.56404	2.95681	2	17.0269	16.9616	16.9942	0.67735	1.5992	1.84893	WT CID 1d
808 34	2	13.1607	13.1226	13.1416	1.85315	3.61288	2	16.9997	16.914	16.9569	0.714713	1.64116	2.20143	WT CID 1d
808 35	2	12.953	13.1923	13.0726	1.92219	3.78997	2	16.9087	16.8598	16.8842	0.787381	1.72594	2.19589	WT CID 1d
808 36	2	13.3005	13.3615	13.331	1.66379	3.16848	2	16.9108	16.9048	16.9078	0.763794	1.69795	1.86606	WT CID 1d
808 37	2	13.6386	13.4419	13.5403	1.45452	2.74065	2	17.1725	17.1855	17.179	0.492613	1.40699	1.94788	WT CID 1d
808 38	2	13.1792	13.2514	13.2153	1.77952	3.43312	2	16.9072	16.9679	16.9375	0.734084	1.66334	2.06399	WT CID 1d
808 50	2	12.5889	12.7049	12.6469	2.34793	5.09092	2	17.3057	17.3248	17.3152	0.35635	1.28018	3.97671	WT CID 1d LPS
808 55	2	13.4686	13.5581	13.5134	1.48144	2.79227	2	17.6093	17.6523	17.6308	0.04077	1.02866	2.71446	WT CID 1d LPS
808 56	2	12.7688	12.7692	12.769	2.22582	4.67775	2	17.2759	17.2891	17.2825	0.389077	1.30955	3.57202	WT CID 1d LPS
808 57	2	12.7559	12.7677	12.7618	2.23296	4.70098	2	17.2126	17.2374	17.225	0.44657	1.3628	3.44951	WT CID 1d LPS
808 58	2	12.9711	12.9383	12.9547	2.04013	4.11282	2	17.5988	17.542	17.5704	0.10119	1.07266	3.83423	WT CID 1d LPS
808 59	2	12.6452	12.4794	12.5623	2.4325	5.39827	2	17.4365	17.4032	17.4199	0.251718	1.19062	4.53399	WT CID 1d LPS
808 60	2	12.5443	12.7183	12.6313	2.3635	5.14619	2	17.2861	17.3451	17.3156	0.355986	1.27986	4.0209	WT CID 1d LPS
808 39	2	12.8703	12.8455	12.8579	2.13685	4.398	2	16.9291	16.858	16.8936	0.778035	1.71479	2.56474	WT CID 1w
808 40	2	13.1875	13.2231	13.2053	1.78954	3.45704	2	16.9016	17.1462	17.0239	0.647715	1.56668	2.2066	WT CID 1w
808 41	2	12.6499	12.7323	12.6911	2.30366	4.93709	2	16.8622	16.8837	16.8729	0.798662	1.73949	2.83824	WT CID 1w
808 42	2	12.9484	12.8675	12.9079	2.08686	4.24822	2	16.7328	16.7491	16.741	0.93061	1.90608	2.22877	WT CID 1w
808 43	2	12.6696	12.6275	12.6486	2.34624	5.08499	2	16.8703	16.8216	16.8459	0.825648	1.77233	2.8691	WT CID 1w
808 44	2	12.6585	12.4113	12.5349	2.45989	5.50176	2	17.3139	17.2781	17.296	0.375616	1.29739	4.24063	WT CID 1w LPS
808 45	2	12.413	12.4915	12.4522	2.54259	5.82635	2	17.336	17.2891	17.3126	0.358993	1.28253	4.54286	WT CID 1w LPS
808 46	2	12.9969	13.0226	13.0098	1.98502	3.95867	2	17.356	17.3678	17.3619	0.309663	1.23942	3.19397	WT CID 1w LPS
808 47	2	12.7227	12.7673	12.745	2.24981	4.75621	2	17.3879	17.6047	17.4963	0.175289	1.12919	4.21206	WT CID 1w LPS
808 48	2	12.7383	12.3782	12.5583	2.43655	5.41345	2	17.3642	17.4212	17.3927	0.278895	1.21327	4.46188	WT CID 1w LPS
808 49	2	12.1293	12.1808	12.155	2.83976	7.15901	2	16.9831	17.1276	17.0553	0.616247	1.53288	4.67029	WT CID 1w LPS
807 58	2	12.7066	12.7592	12.7329	2.2619	4.79623	2	16.9764	17.1135	17.045	0.626635	1.54396	3.10644	WT CID 5w
807 59	2	12.3143	12.3275	12.3209	2.67387	6.3814	2	16.7161	16.7955	16.7558	0.915816	1.88664	3.38242	WT CID 5w
808 60	2	12.3734	12.4272	12.4003	2.59452	6.0399	2	16.7307	16.7676	16.7492	0.922429	1.8953	3.18677	WT CID 5w
808 61	2	12.2936	12.3441	12.3189	2.67594	6.39056	2	16.6796	16.661	16.6703	1.00129	2.00179	3.19242	WT CID 5w
808 26	2	11.9824	12.0204	12.0014	2.99338	7.96336	2	17.0048	17.1529	17.0789	0.592735	1.5081	5.28038	WT CID 5w LPS
808 27	2	12.2499	12.1924	12.2211	2.77366	6.83839	2	17.3135	17.348	17.3307	0.340867	1.26652	5.39937	WT CID 5w LPS
808 28	2	12.1438	12.1521	12.1479	2.84687	7.1944	2	17.3163	17.3993	17.3578	0.313775	1.24296	5.78814	WT CID 5w LPS
808 29	2	12.0067	12.0067	12.0067	2.98813	7.93445	2	17.3018	17.2685	17.2851	0.386464	1.30719	6.06987	WT CID 5w LPS
808 30	2	11.6438	11.6438	11.6438	3.35096	10.2033	2	17.1564	17.1136	17.135	0.536593	1.45054	7.03413	WT CID 5w LPS
				14.9948						17.6716
				28.6722						31.2143
807 808	Liver	Fig 1.M
Zip14/RPL 19	Efficiency target	Target Ct 1	Target Ct 2	Target Ct	Delta Ct target	Numerator	Efficiency refer.	Refer. Ct 1	Refer. Ct 2	Refer. Ct	Delta Ct refer.	Denominator	Fold Induction	Zip14/RPL 19
807 1	2	26.248	26.2361	26.2421	0.298988	1.23028	2	17.8838	17.8492	17.8665	0.100847	1.0724	1.14722	WT ND CT
807 2	2	26.5718	26.4514	26.5116	0.0294724	1.02064	2	18.1908	18.2071	18.199	-0.231608	0.851685	1.19838	WT ND CT
807 3	2	26.1396	26.189	26.1643	0.376744	1.29841	2	17.9732	17.86	17.9166	0.0507889	1.03583	1.25349	WT ND CT
807 4	2	26.2322	26.1261	26.1792	0.361913	1.28513	2	17.9875	17.8169	17.9022	0.0651283	1.04618	1.2284	WT ND CT
808 1	2	27.1918	27.3764	27.2841	-0.74305	0.597475	2	17.9582	17.979	17.9686	-0.00126839	0.999121	0.598001	WT ND CT
808 2	2	26.36	26.6659	26.513	0.0281019	1.01967	2	18.1153	17.8939	18.0046	-0.0372677	0.974499	1.04635	WT ND CT
808 3	2	26.8331	26.9533	26.8932	-0.35217	0.783405	2	17.97	17.8579	17.914	0.05338	1.03769	0.754948	WT ND CT
808 24	2	24.4674	24.4873	24.4774	2.0637	4.18058	2	17.8466	17.91	17.8783	0.0890436	1.06366	3.93036	WT ND LPS
808 25	2	23.6534	23.7888	23.7211	2.81993	7.06128	2	17.9367	17.9061	17.9214	0.0459433	1.03236	6.83995	WT ND LPS
808 31	2	24.5128	24.5149	24.5138	2.02725	4.07626	2	18.1787	18.2228	18.2008	-0.233407	0.850624	4.79208	WT ND LPS
808 32	2	24.2399	24.2315	24.2357	2.30535	4.94288	2	17.9925	17.9738	17.9832	-0.0158205	0.989094	4.99738	WT ND LPS
807 58	2	26.3689	26.3675	26.3682	0.172864	1.12729	2	17.3398	17.4574	17.3986	0.568737	1.48322	0.760029	WT CID 5w CT
807 59	2	26.3604	26.4085	26.3845	0.15661	1.11467	2	17.3128	17.3857	17.3492	0.618114	1.53487	0.726229	WT CID 5w CT
807 60	2	25.8925	25.9298	25.9111	0.629945	1.54751	2	17.5222	17.4182	17.4702	0.497147	1.41142	1.09642	WT CID 5w CT
807 61	2	26.4342	26.3763	26.4053	0.135803	1.0987	2	17.61	17.6018	17.6059	0.361442	1.28471	0.855217	WT CID 5w CT
808 26	2	23.4197	23.5843	23.502	3.0391	8.21978	2	17.5592	17.5212	17.5402	0.427126	1.34455	6.11339	WT CID 5w LPS
808 27	2	23.8819	23.9823	23.9321	2.60894	6.10057	2	17.9204	17.9302	17.9253	0.0420504	1.02958	5.92533	WT CID 5w LPS
808 28	2	23.9711	24.2174	24.0942	2.44685	5.45225	2	17.9883	17.8495	17.9189	0.0484304	1.03414	5.27226	WT CID 5w LPS
808 29	2	23.783	23.8166	23.7998	2.74128	6.68663	2	17.9851	18.0088	17.9969	-0.0295954	0.979695	6.82522	WT CID 5w LPS
808 30	2	23.8361	24.1842	24.0101	2.53094	5.77948	2	17.6547	17.67	17.6624	0.304993	1.23541	4.67818	WT CID 5w LPS
808 4	2	25.4666	25.6037	25.5352	1.00589	2.00818	2	17.1095	17.1523	17.1309	0.836434	1.78563	1.12463	KO ND
808 5	2	25.7537	25.5703	25.662	0.879078	1.8392	2	17.0029	17.1618	17.0824	0.884989	1.84675	0.995911	KO ND
808 6	2	25.4004	25.2805	25.3405	1.20057	2.2983	2	17.543	17.5309	17.537	0.43039	1.3476	1.70548	KO ND
808 7	2	25.0051	24.957	24.981	1.56005	2.94864	2	17.177	17.17	17.1735	0.793841	1.73368	1.70079	KO ND
808 8	2	24.3776	24.4085	24.393	2.14805	4.43228	2	17.2785	16.792	17.0353	0.932086	1.90803	2.32296	KO ND
808 9	2	23.2604	23.4343	23.3473	3.19373	9.14975	2	16.9535	16.9594	16.9564	1.01093	2.01521	4.54034	KO ND LPS
808 10	2	23.5675	23.5245	23.546	2.99508	7.97275	2	17.3621	17.4519	17.407	0.560383	1.47466	5.4065	KO ND LPS
808 11	2	23.1677	23.3658	23.2667	3.27435	9.67557	2	17.3027	17.3995	17.3511	0.616266	1.5329	6.31193	KO ND LPS
808 12	2	23.484	23.3512	23.4176	3.1235	8.71501	2	17.4239	17.5583	17.4911	0.476221	1.3911	6.26485	KO ND LPS
808 13	2	23.7607	23.5036	23.6321	2.90894	7.51064	2	17.3191	17.3546	17.3369	0.630488	1.54809	4.85155	KO ND LPS
808 14	2	23.5825	23.6342	23.6083	2.93274	7.63558	2	17.2538	17.3325	17.2931	0.674199	1.59571	4.78506	KO ND LPS
808 15	2	32.3472	26.7682	29.5577	-3.01667	0.123564	2	17.8799	17.8799	17.8799	0.0874977	1.06253	0.116293	KO IDD 5w CT
808 16	2	26.1092	26.2764	26.1928	0.348276	1.27304	2	17.3979	17.566	17.4819	0.485427	1.4	0.909313	KO IDD 5w CT
807 21	2	25.3511	25.4584	25.4047	1.13635	2.19824	2	17.5366	17.6123	17.5745	0.392898	1.31303	1.67417	KO IDD 5w CT
807 22	2	26.1025	25.933	26.0177	0.523343	1.43728	2	17.502	17.5885	17.5452	0.422111	1.33989	1.07269	KO IDD 5w CT
807 23	2	26.1549	26.1825	26.1687	0.372397	1.2945	2	17.8125	17.8572	17.8348	0.132513	1.0962	1.1809	KO IDD 5w CT
807 34	2	26.9009	26.9036	26.9023	-0.361184	0.778525	2	17.5561	17.6745	17.6153	0.352051	1.27637	0.609951	KO IDD 5w CT
807 35	2	26.7799	26.6785	26.7292	-0.188172	0.877717	2	17.7702	17.7981	17.7841	0.18322	1.13542	0.773036	KO IDD 5w CT
808 17	2	24.2386	24.2979	24.2683	2.27279	4.83258	2	17.7273	17.7208	17.724	0.243322	1.18372	4.08256	KO IDD 5w LPS
808 18	2	23.8547	23.9328	23.8937	2.64732	6.26503	2	17.758	17.8287	17.7933	0.174018	1.1282	5.55314	KO IDD 5w LPS
808 19	2	23.8118	23.966	23.8889	2.65217	6.2861	2	17.6523	17.5602	17.6063	0.361059	1.28437	4.89431	KO IDD 5w LPS
808 20	2	23.886	24.1376	24.0118	2.52925	5.77273	2	17.9608	17.9288	17.9448	0.0225849	1.01578	5.68306	KO IDD 5w LPS
				26.5411						17.9673
				36.2562						31.7929
807 808	Liver	Fig 1.N
LCN2/RPL 19	Efficiency target	Target Ct 1	Target Ct 2	Target Ct	Delta Ct target	Numerator	Efficiency refer.	Refer. Ct 1	Refer. Ct 2	Refer. Ct	Delta Ct refer.	Denominator	Fold Induction	LCN2/RPL 19
807 1	2	25.4055	25.4443	25.4249	-0.71804	0.607923	2	17.8838	17.8492	17.8665	0.100847	1.0724	0.566879	WT ND CT
807 2	2	25.2318	25.3674	25.2996	-0.59274	0.663082	2	18.1908	18.2071	18.199	-0.231608	0.851685	0.778553	WT ND CT
807 3	2	24.227	23.9677	24.0974	0.609507	1.52574	2	17.9732	17.86	17.9166	0.0507889	1.03583	1.47296	WT ND CT
807 4	2	24.6557	24.516	24.5859	0.121002	1.08749	2	17.9875	17.8169	17.9022	0.0651283	1.04618	1.03949	WT ND CT
808 1	2	23.7629	23.7434	23.7531	0.953732	1.93688	2	17.9582	17.979	17.9686	-0.00126839	0.999121	1.93858	WT ND CT
808 2	2	25.2807	24.9286	25.1047	-0.397828	0.759	2	18.1153	17.8939	18.0046	-0.0372677	0.974499	0.778862	WT ND CT
808 3	2	24.7924	24.5725	24.6825	0.0243669	1.01703	2	17.97	17.8579	17.914	0.05338	1.03769	0.980091	WT ND CT
808 24	2	16.2836	16.0009	16.1423	8.5646	378.618	2	17.8466	17.91	17.8783	0.0890436	1.06366	355.956	WT ND LPS
808 25	2	15.399	15.2947	15.3468	9.36001	657.12	2	17.9367	17.9061	17.9214	0.0459433	1.03236	636.524	WT ND LPS
808 31	2	15.3765	15.3528	15.3647	9.3422	649.056	2	18.1787	18.2228	18.2008	-0.233407	0.850624	763.036	WT ND LPS
808 32	2	15.2609	15.2396	15.2503	9.45658	702.612	2	17.9925	17.9738	17.9832	-0.0158205	0.989094	710.359	WT ND LPS
807 58	2	25.404	25.3111	25.3575	-0.650674	0.636983	2	17.3398	17.4574	17.3986	0.568737	1.48322	0.429458	WT CID 5w CT
807 59	2	25.1692	25.2304	25.1998	-0.492929	0.710581	2	17.3128	17.3857	17.3492	0.618114	1.53487	0.462959	WT CID 5w CT
807 60	2	25.1314	25.1991	25.1652	-0.45837	0.727808	2	17.5222	17.4182	17.4702	0.497147	1.41142	0.515657	WT CID 5w CT
807 61	2	25.347	25.2008	25.2739	-0.567071	0.674986	2	17.61	17.6018	17.6059	0.361442	1.28471	0.5254	WT CID 5w CT
808 26	2	14.9704	14.8511	14.9107	9.79612	889.048	2	17.5592	17.5212	17.5402	0.427126	1.34455	661.222	WT CID 5w LPS
808 27	2	15.3293	15.3057	15.3175	9.38934	670.613	2	17.9204	17.9302	17.9253	0.0420504	1.02958	651.348	WT CID 5w LPS
808 28	2	15.2201	15.2416	15.2309	9.47598	712.119	2	17.9883	17.8495	17.9189	0.0484304	1.03414	688.611	WT CID 5w LPS
808 29	2	15.2006	15.0425	15.1216	9.5853	768.177	2	17.9851	18.0088	17.9969	-0.0295954	0.979695	784.099	WT CID 5w LPS
808 30	2	14.9228	14.902	14.9124	9.79445	888.019	2	17.6547	17.67	17.6624	0.304993	1.23541	718.804	WT CID 5w LPS
808 4	2	23.6898	23.6622	23.676	1.03089	2.04328	2	17.1095	17.1523	17.1309	0.836434	1.78563	1.14429	KO ND
808 5	2	23.4086	23.5647	23.4867	1.2202	2.32979	2	17.0029	17.1618	17.0824	0.884989	1.84675	1.26156	KO ND
808 6	2	24.1716	24.2577	24.2146	0.492213	1.4066	2	17.543	17.5309	17.537	0.43039	1.3476	1.04378	KO ND
808 7	2	24.2655	24.3394	24.3025	0.404401	1.32354	2	17.177	17.17	17.1735	0.793841	1.73368	0.763426	KO ND
808 8	2	23.301	23.3358	23.3184	1.38845	2.61796	2	17.2785	16.792	17.0353	0.932086	1.90803	1.37208	KO ND
808 9	2	14.6546	14.5408	14.5977	10.1091	1104.47	2	16.9535	16.9594	16.9564	1.01093	2.01521	548.066	KO ND LPS
808 10	2	15.1331	14.9663	15.0497	9.65715	807.406	2	17.3621	17.4519	17.407	0.560383	1.47466	547.52	KO ND LPS
808 11	2	14.847	14.741	14.794	9.91284	963.97	2	17.3027	17.3995	17.3511	0.616266	1.5329	628.852	KO ND LPS
808 12	2	15.1282	14.9841	15.0562	9.65069	803.798	2	17.4239	17.5583	17.4911	0.476221	1.3911	577.817	KO ND LPS
808 13	2	14.8174	14.7581	14.7877	9.91915	968.19	2	17.3191	17.3546	17.3369	0.630488	1.54809	625.41	KO ND LPS
808 14	2	14.6294	14.6422	14.6358	10.0711	1075.7	2	17.2538	17.3325	17.2931	0.674199	1.59571	674.12	KO ND LPS
808 15	2	23.1986	22.9664	23.0825	1.62437	3.08307	2	17.8799	17.8799	17.8799	0.0874977	1.06253	2.90164	KO IDD 5w CT
808 16	2	23.1285	22.9977	23.0631	1.64375	3.12477	2	17.3979	17.566	17.4819	0.485427	1.4	2.23198	KO IDD 5w CT
807 21	2	18.9404	18.9641	18.9522	5.75462	53.9901	2	17.5366	17.6123	17.5745	0.392898	1.31303		KO IDD 5w CT
807 22	2	17.5422	17.4771	17.5096	7.19723	146.751	2	17.502	17.5885	17.5452	0.422111	1.33989		KO IDD 5w CT
807 23	2	23.581	23.6372	23.6091	1.09776	2.14023	2	17.8125	17.8572	17.8348	0.132513	1.0962	1.9524	KO IDD 5w CT
807 34	2	24.7896	24.7316	24.7606	-0.0537247	0.963446	2	17.5561	17.6745	17.6153	0.352051	1.27637	0.75483	KO IDD 5w CT
807 35	2	24.5348	24.4271	24.4809	0.22592	1.16952	2	17.7702	17.7981	17.7841	0.18322	1.13542	1.03004	KO IDD 5w CT
808 17	2	15.2478	15.2691	15.2585	9.4484	698.636	2	17.7273	17.7208	17.724	0.243322	1.18372	590.206	KO IDD 5w LPS
808 18	2	14.9827	14.9427	14.9627	9.74415	857.596	2	17.758	17.8287	17.7933	0.174018	1.1282	760.148	KO IDD 5w LPS
808 19	2	14.9781	14.8863	14.9322	9.77466	875.921	2	17.6523	17.5602	17.6063	0.361059	1.28437	681.986	KO IDD 5w LPS
808 20	2	15.2369	15.2929	15.2649	9.44199	695.542	2	17.9608	17.9288	17.9448	0.0225849	1.01578	684.738	KO IDD 5w LPS
				24.7069						17.9673
				34.9152						31.7929
807 808	Liver	Fig. 1.J
FPN+/RPL 19	Efficiency target	Target Ct 1	Target Ct 2	Target Ct	Delta Ct target	Numerator	Efficiency refer.	Refer. Ct 1	Refer. Ct 2	Refer. Ct	Delta Ct refer.	Denominator	Fold Induction	FPN+/RPL 19
807 1	2	22.5582	22.3281	22.4431	0.374456	1.29635	2	17.5713	17.4598	17.5155	0.137474	1.09998	1.17853	WT CT
807 2	2	23.1482	22.8552	23.0017	-0.184101	0.880197	2	17.8877	17.8968	17.8923	-0.239249	0.847186	1.03897	WT CT
807 3	2	22.8866	22.6539	22.7702	0.0473516	1.03337	2	17.7018	17.5531	17.6275	0.0255419	1.01786	1.01523	WT CT
807 4	2	22.519	22.3168	22.4179	0.399643	1.31918	2	17.5711	17.5572	17.5642	0.0888429	1.06352	1.2404	WT CT
808 1	2	23.4528	23.0213	23.237	-0.419471	0.747699	2	17.7624	17.6363	17.6993	-0.0462956	0.96842	0.772081	WT CT
808 2	2	22.5085	22.4527	22.4806	0.336976	1.26311	2	17.5605	17.611	17.5857	0.0672699	1.04773	1.20556	WT CT
808 3	2	23.3591	23.3857	23.3724	-0.554854	0.680726	2	17.6647	17.7085	17.6866	-0.033584	0.97699	0.696758	WT CT
808 24	2	25.2106	25.0047	25.1077	-2.29009	0.204463	2	17.4618	17.5372	17.4995	0.153509	1.11227	0.183825	WT LPS
808 25	2	25.2828	25.3155	25.2992	-2.4816	0.179045	2	17.5862	17.473	17.5296	0.123403	1.0893	0.164367	WT LPS
808 31	2	25.8254	26.1212	25.9733	-3.15568	0.112213	2	17.767	17.8122	17.7896	-0.136629	0.909642	0.12336	WT LPS
808 32	2	26.2116	26.3318	26.2717	-3.45413	0.0912439	2	17.7024	17.6619	17.6821	-0.0291065	0.980027	0.0931034	WT LPS
807 58	2	20.7706	20.6543	20.7124	2.10513	4.30237	2	16.9341	16.9129	16.9235	0.729506	1.65807	2.5948	WT CID
807 59	2	21.2264	21.1468	21.1866	1.63094	3.09714	2	17.0102	16.9778	16.994	0.659017	1.57901	1.96145	WT CID
807 60	2	20.7814	20.827	20.8042	2.01336	4.0372	2	17.2391	17.2638	17.2514	0.401589	1.32096	3.05626	WT CID
807 61	2	20.9112	20.8193	20.8652	1.95234	3.87001	2	17.2863	17.2834	17.2848	0.368164	1.29071	2.99836	WT CID
808 26	2	23.4457	23.5716	23.5086	-0.691067	0.619396	2	17.4133	17.3816	17.3975	0.255554	1.19379	0.518846	WT CID LPS
808 27	2	23.5861	24.0145	23.8003	-0.982719	0.506025	2	17.7276	17.7698	17.7487	-0.0956587	0.935845	0.540715	WT CID LPS
808 28	2	24.3019	23.9636	24.1328	-1.31518	0.401875	2	17.5882	17.7375	17.6629	-0.00985663	0.993191	0.40463	WT CID LPS
808 29	2	23.7598	23.8611	23.8105	-0.992884	0.502472	2	17.5574	17.7201	17.6388	0.0142542	1.00993	0.497532	WT CID LPS
808 30	2	23.5192	23.4245	23.4719	-0.654276	0.635394	2	17.5041	17.3181	17.4111	0.241906	1.18255	0.537307	WT CID LPS
808 4	2	19.9689	19.9689	19.9689	2.84869	7.20347	2	16.9226	16.8696	16.8961	0.756873	1.68982	4.26285	KO ND
808 5	2	21.1937	21.1269	21.1603	1.6573	3.15426	2	16.9706	17.0088	16.9897	0.663342	1.58375	1.99164	KO ND
808 6	2	22.3112	22.3516	22.3314	0.486146	1.4007	2	17.672	17.5805	17.6262	0.0267816	1.01874	1.37494	KO ND
808 7	2	21.0194	20.9331	20.9763	1.8413	3.58332	2	17.2969	17.1302	17.2136	0.439458	1.3561	2.64238	KO ND
808 8	2	20.8756	20.756	20.8158	2.00178	4.00495	2	16.9894	16.7516	16.8705	0.782533	1.72015	2.32826	KO ND
808 9	2	22.503	22.3306	22.4168	0.400762	1.32021	2	16.7388	16.8683	16.8036	0.849454	1.80182	0.732707	KO ND LPS
808 10	2	22.5412	22.7034	22.6223	0.195245	1.14492	2	17.2405	17.3259	17.2832	0.369824	1.2922	0.886026	KO ND LPS
808 11	2	23.4625	23.3745	23.4185	-0.600944	0.659322	2	16.9736	16.9939	16.9837	0.66927	1.59027	0.414598	KO ND LPS
808 12	2	23.694	23.7069	23.7004	-0.882863	0.54229	2	17.7951	17.8251	17.8101	-0.157093	0.89683	0.604674	KO ND LPS
808 13	2	23.8197	23.8637	23.8417	-1.02411	0.491714	2	17.4521	17.2995	17.3758	0.277235	1.21187	0.405749	KO ND LPS
808 14	2	23.9378	23.8648	23.9013	-1.08373	0.471806	2	17.2475	17.3427	17.2951	0.357894	1.28155	0.368152	KO ND LPS
808 15	2	22.7402	22.6232	22.6817	0.13587	1.09875	2	17.7611	17.6713	17.7162	-0.0631594	0.957166	1.14793	KO IDD
808 16	2	21.6795	21.6895	21.6845	1.13306	2.19323	2	17.042	17.2403	17.1411	0.511874	1.4259	1.53813	KO IDD
807 21	2	21.4734	21.6284	21.5509	1.26672	2.40614	2	17.1707	17.4367	17.3037	0.349264	1.27391	1.88878	KO IDD
807 22	2	21.8055	21.7004	21.7529	1.06466	2.09168	2	17.1233	17.2378	17.1806	0.472448	1.38746	1.50756	KO IDD
807 23	2	21.3835	21.5414	21.4624	1.35514	2.55822	2	17.4404	17.4917	17.4661	0.186939	1.13835	2.24731	KO IDD
807 34	2	22.3663	22.3988	22.3825	0.435034	1.35194	2	17.489	17.3778	17.4334	0.219623	1.16443	1.16103	KO IDD
807 35	2	22.2435	22.1594	22.2014	0.616157	1.53279	2	17.482	17.5171	17.4996	0.153452	1.11223	1.37812	KO IDD
808 17	2	24.6002	24.6191	24.6097	-1.79208	0.288755	2	17.5596	17.5301	17.5448	0.108163	1.07786	0.267898	KO IDD LPS
808 18	2	23.6798	23.7752	23.7275	-0.909946	0.532205	2	17.345	17.3736	17.3593	0.293742	1.22582	0.434164	KO IDD LPS
808 19	2	23.9068	23.769	23.8379	-1.02032	0.493006	2	17.2809	17.3334	17.3072	0.345837	1.27089	0.387922	KO IDD LPS
808 20	2	25.1963	25.1963	25.1963	-2.37871	0.192281	2	17.6071	17.5936	17.6004	0.0526386	1.03716	0.185392	KO IDD LPS
		35.4296		22.8176				30.7672		17.653
807 808	Liver	Fig 1.O
TfR1/RPL 19	Efficiency target	Target Ct 1	Target Ct 2	Target Ct	Delta Ct target	Numerator	Efficiency refer.	Refer. Ct 1	Refer. Ct 2	Refer. Ct	Delta Ct refer.	Denominator	Fold Induction	TfR1/RPL 19
807 1	2	26.6645	26.3887	26.5266	0.436345	1.35317	2	17.5713	17.4598	17.5155	0.160351	1.11756	1.21083	WT CT
807 2	2	26.5786	26.5067	26.5426	0.420275	1.33818	2	17.8877	17.8968	17.8923	-0.216372	0.860727	1.55471	WT CT
807 3	2	25.7902	25.5706		26.9629	1.30811e+08	2	17.7018	17.5531		17.6759	209398		WT CT
807 4	2	25.4341	25.4657		26.9629	1.30811e+08	2	17.5711	17.5572		17.6759	209398		WT CT
808 1	2	26.8275	26.7745	26.801	0.161928	1.11878	2	17.7624	17.6363	17.6993	-0.0234186	0.983898	1.13709	WT CT
808 2	2	26.9488	27.2978	27.1233	-0.16039	0.894783	2	17.5605	17.611	17.5857	0.0901468	1.06448	0.840584	WT CT
808 3	2	28.0205	27.6217	27.8211	-0.858158	0.551657	2	17.6647	17.7085	17.6866	-0.0107071	0.992606	0.555766	WT CT
808 24	2	27.4209	27.3031	27.362	-0.399106	0.758328	2	17.4618	17.5372	17.4995	0.176386	1.13005	0.671058	WT LPS
808 25	2	26.2281	26.4092	26.3187	0.644225	1.5629	2	17.5862	17.473	17.5296	0.14628	1.10671	1.4122	WT LPS
808 31	2	27.2122	27.1837	27.198	-0.235042	0.84966	2	17.767	17.8122	17.7896	-0.113752	0.924182	0.919365	WT LPS
808 32	2	26.6052	26.5043	26.5548	0.408162	1.32699	2	17.7024	17.6619	17.6821	-0.00622959	0.995691	1.33274	WT LPS
807 58	2	26.7403	26.6762	26.7083	0.25466	1.19305	2	16.9341	16.9129	16.9235	0.752383	1.68457	0.708224	WT CID
807 59	2	27.3161	27.3055	27.3108	-0.347918	0.785717	2	17.0102	16.9778	16.994	0.681894	1.60424	0.489774	WT CID
807 60	2	27.9124	27.1516	27.532	-0.569119	0.674028	2	17.2391	17.2638	17.2514	0.424466	1.34208	0.502228	WT CID
807 61	2	26.7714	26.8962	26.8338	0.12914	1.09364	2	17.2863	17.2834	17.2848	0.391041	1.31134	0.833989	WT CID
808 26	2	27.3416	27.4205	27.381	-0.418127	0.748396	2	17.4133	17.3816	17.3975	0.278431	1.21287	0.617043	WT CID LPS
808 27	2	27.6102	28.2549	27.9325	-0.969622	0.51064	2	17.7276	17.7698	17.7487	-0.0727818	0.950803	0.537062	WT CID LPS
808 28	2	27.9038	28.2179	28.0609	-1.09796	0.467176	2	17.5882	17.7375	17.6629	0.0130203	1.00907	0.462979	WT CID LPS
808 29	2	27.027	27.0003	27.0137	-0.0507504	0.965434	2	17.5574	17.7201	17.6388	0.0371311	1.02607	0.940903	WT CID LPS
808 30	2	25.9477	26.3058	26.1268	0.836143	1.78527	2	17.5041	17.3181	17.4111	0.264783	1.20146	1.48592	WT CID LPS
808 4	2	26.8456	26.8456	26.8456	0.1173	1.0847	2	16.9226	16.8696	16.8961	0.77975	1.71683	0.631805	KO ND
808 5	2	26.7841	26.674	26.729	0.233896	1.17601	2	16.9706	17.0088	16.9897	0.686219	1.60906	0.730865	KO ND
808 6	2	27.9965	27.504	27.7503	-0.787353	0.579406	2	17.672	17.5805	17.6262	0.0496586	1.03502	0.559802	KO ND
808 7	2	26.9085	26.7876	26.848	0.114873	1.08288	2	17.2969	17.1302	17.2136	0.462335	1.37777	0.785966	KO ND
808 8	2	26.2284	25.9952	26.1118	0.85113	1.80391	2	16.9894	16.7516	16.8705	0.80541	1.74764	1.0322	KO ND
808 9	2	26.161	26.2661	26.2135	0.749373	1.68106	2	16.7388	16.8683	16.8036	0.87233	1.83062	0.918303	KO ND LPS
808 10	2	27.2812	26.9366	27.1089	-0.145988	0.90376	2	17.2405	17.3259	17.2832	0.392701	1.31285	0.688396	KO ND LPS
808 11	2	25.918	26.1466	26.0323	0.930615	1.90609	2	16.9736	16.9939	16.9837	0.692147	1.61569	1.17974	KO ND LPS
808 12	2	26.3549	26.819	26.587	0.375937	1.29768	2	17.7951	17.8251	17.8101	-0.134216	0.911165	1.4242	KO ND LPS
808 13	2	26.9244	27.1014	27.0129	-0.0499893	0.965943	2	17.4521	17.2995	17.3758	0.300112	1.23124	0.784529	KO ND LPS
808 14	2	26.19	25.9712	26.0806	0.882274	1.84328	2	17.2475	17.3427	17.2951	0.380771	1.30204	1.41569	KO ND LPS
808 15	2	25.6439	25.4269	25.5354	1.4275	2.68981	2	17.7611	17.6713	17.7162	-0.0402824	0.972465	2.76597	KO IDD
808 16	2	25.7738	25.9157	25.8447	1.11817	2.17071	2	17.042	17.2403	17.1411	0.534751	1.44869	1.49839	KO IDD
807 21	2	25.9505	25.7803	25.8654	1.09748	2.13981	2	17.1707	17.4367	17.3037	0.372141	1.29427	1.65329	KO IDD
807 22	2	23.7569	23.7608	23.7588	3.20409	9.21566	2	17.1233	17.2378	17.1806	0.495325	1.40964	6.53761	KO IDD
807 23	2	25.7349	25.9889	25.8619	1.10104	2.1451	2	17.4404	17.4917	17.4661	0.209816	1.15654	1.85475	KO IDD
807 34	2	23.5419	23.616	23.5789	3.38398	10.4395	2	17.489	17.3778	17.4334	0.2425	1.18304	8.82426	KO IDD
807 35	2	25.4849	25.4743	25.4796	1.48328	2.79584	2	17.482	17.5171	17.4996	0.176328	1.13	2.47418	KO IDD
808 17	2	26.3099	26.3491	26.3295	0.633419	1.55124	2	17.5596	17.5301	17.5448	0.13104	1.09508	1.41655	KO IDD LPS
808 18	2	26.9731	26.3572	26.6652	0.297758	1.22923	2	17.345	17.3736	17.3593	0.316619	1.24541	0.987012	KO IDD LPS
808 19	2	26.9558	26.8335	26.8946	0.0682682	1.04846	2	17.2809	17.3334	17.3072	0.368714	1.2912	0.812001	KO IDD LPS
808 20	2	27.5013	26.8924	27.1969	-0.233949	0.850304	2	17.6071	17.5936	17.6004	0.0755156	1.05374	0.806941	KO IDD LPS
		36.3083		26.9629				30.7672		17.6759
807 808	Liver	Fig 1.L
DMT1/RPL 19	Efficiency target	Target Ct 1	Target Ct 2	Target Ct	Delta Ct target	Numerator	Efficiency refer.	Refer. Ct 1	Refer. Ct 2	Refer. Ct	Delta Ct refer.	Denominator	Fold Induction	DMT1/RPL 19
807 1	2	29.7617	29.9838	29.8728	-0.282262	0.8223	2	19.8143	19.9806	19.8975	-0.391107	0.762544	1.07836	WT CT
807 2	2	30.319	30.1406	30.2298	-0.639289	0.642029	2	20.5882	20.2392	20.4137	-0.907349	0.533164	1.20419	WT CT
807 3	2	28.9049	28.9303	28.9176	0.672924	1.5943	2	18.8811	18.8546	18.8679	0.638508	1.55672	1.02414	WT CT
807 4	2	28.862	28.6023	28.7322	0.858347	1.81296	2	19.2224	19.2528	19.2376	0.268762	1.20477	1.50481	WT CT
808 1	2	30.0354	29.6807	29.8581	-0.267553	0.830727	2	19.5553	19.5251	19.5402	-0.0338086	0.976838	0.850425	WT CT
808 2	2	29.7946	29.6591	29.7269	-0.136371	0.909805	2	19.3994	19.5302	19.4648	0.041567	1.02923	0.883965	WT CT
808 3	2	29.9118	29.6808	29.7963	-0.205796	0.86706	2	19.1303	19.1156	19.1229	0.383429	1.30444	0.6647	WT CT
808 24	2	26.594	26.5932	26.5936	2.99692	7.98292	2	18.9201	18.9075	18.9138	0.592595	1.50796	5.29386	WT LPS
808 25	2	26.0198	26.028	26.0239	3.5666	11.8483	2	19.4315	19.5919	19.5117	-0.00530325	0.996331	11.8919	WT LPS
808 31	2	25.6437	25.7382	25.6909	3.89957	14.9241	2	18.7054	18.6436	18.6745	0.831853	1.77997	8.38446	WT LPS
808 32	2	25.0873	25.2469	25.1671	4.42337	21.4569	2	18.363	18.3782	18.3706	1.13579	2.19739	9.76473	WT LPS
807 58	2	29.0833	29.3469	29.2151	0.375385	1.29719	2	18.9342	18.9966	18.9654	0.540942	1.45492	0.891584	WT CID
807 59	2	29.9701	29.9701	29.9701	-0.379649	0.768625	2	18.9543	18.9388	18.9466	0.559813	1.47408	0.521427	WT CID
807 60	2	29.5475	29.8133	29.6804	-0.0898805	0.939601	2	19.032	19.0139	19.0229	0.483428	1.39806	0.672074	WT CID
807 61	2	29.8372	29.607	29.7221	-0.131636	0.912796	2	19.2369	19.1684	19.2027	0.303713	1.23432	0.739515	WT CID
808 26	2	25.8724	26.0403	25.9563	3.63415	12.4162	2	19.2326	19.1391	19.1858	0.320523	1.24878	9.94266	WT CID LPS
808 27	2	26.3871	26.3904	26.3887	3.20177	9.20089	2	19.4232	19.4598	19.4415	0.0648786	1.046	8.79629	WT CID LPS
808 28	2	27.0893	27.0708	27.08	2.5105	5.69817	2	19.5603	19.4794	19.5198	-0.0134667	0.990709	5.7516	WT CID LPS
808 29	2	26.3346	26.5878	26.4612	3.12933	8.75026	2	19.7994	19.7269	19.7631	-0.256763	0.836964	10.4548	WT CID LPS
808 30	2	25.7386	25.8722	25.8054	3.78512	13.7859	2	19.1865	19.2896	19.238	0.268335	1.20442	11.4461	WT CID LPS
808 4	2	28.7337	29.0467	28.8902	0.700303	1.62485	2	18.8945	20.4448	19.6697	-0.163296	0.892983	1.81957	KO ND
808 5	2	28.9659	28.7864	28.8761	0.714376	1.64077	2	20.7296	20.4524	20.591	-1.08467	0.471501	3.47989	KO ND
808 6	2	30.4977	30.5384	30.5181	-0.927584	0.525738	2	19.8562	19.6536	19.7549	-0.248543	0.841746	0.62458	KO ND
808 7	2	28.966	28.9252	28.9456	0.644924	1.56366	2	18.9891	19.0222	19.0057	0.500689	1.41489	1.10514	KO ND
808 8	2	28.5631	28.7109	28.637	0.953493	1.93656	2	18.9484	19.0638	19.0061	0.500259	1.41447	1.36911	KO ND
808 9	2	26.0444	26.079	26.0617	3.52883	11.542	2	18.869	18.9237	18.8963	0.610018	1.52628	7.56221	KO ND LPS
808 10	2	26.1562	26.4722	26.3142	3.2763	9.6887	2	19.2091	21.2888	20.249	-0.742598	0.597662	16.211	KO ND LPS
808 11	2	26.789	26.3566	26.5728	3.0177	8.09875	2	21.4716	19.8725	20.6721	-1.16572	0.445741	18.1692	KO ND LPS
808 12	2	26.1002	26.1304	26.1153	3.47517	11.1207	2	19.2746	19.0919	19.1833	0.32309	1.25101	8.88938	KO ND LPS
808 13	2	26.935	26.9432	26.9391	2.65144	6.28293	2	19.3058	19.1291	19.2174	0.288937	1.22174	5.14261	KO ND LPS
808 14	2	26.1071	26.2719	26.1895	3.401	10.5634	2	19.0376	18.9838	19.0107	0.495659	1.40996	7.49195	KO ND LPS
808 15	2	29.6567	29.8761	29.7664	-0.175891	0.885221	2	19.6186	19.6236	19.6211	-0.114728	0.923557	0.958491	KO IDD
808 16	2	29.051	29.1186	29.0848	0.505702	1.41981	2	19.1353	19.404	19.2697	0.236707	1.1783	1.20497	KO IDD
807 21	2	28.5072	28.4044	28.4558	1.13471	2.19575	2	19.633	19.3784	19.5057	0.000676291	1.00047	2.19472	KO IDD
807 22	2	28.8501	28.7095	28.7798	0.810696	1.75406	2	19.1382	19.3401	19.2391	0.267228	1.20349	1.45747	KO IDD
807 23	2	29.7055	29.6358	29.6707	-0.0801664	0.945949	2	19.2801	19.4526	19.3663	0.140054	1.10195	0.858434	KO IDD
807 34	2	29.1648	28.9325	29.0487	0.541821	1.45581	2	19.2364	19.2758	19.2561	0.250227	1.18939	1.22399	KO IDD
807 35	2	29.5949	29.4211	29.508	0.0825047	1.05885	2	19.4144	19.4307	19.4226	0.08381	1.05981	0.999096	KO IDD
808 17	2	27.364	27.4839	27.424	2.16653	4.48943	2	19.6089	19.8974	19.7531	-0.246783	0.842774	5.32697	KO IDD LPS
808 18	2	26.0262	26.2679	26.147	3.44348	10.8791	2	19.9219	19.402	19.6619	-0.155562	0.897782	12.1177	KO IDD LPS
808 19	2	26.2705	26.538	26.4043	3.18621	9.10219	2	19.1825	19.1045	19.1435	0.362846	1.28596	7.07813	KO IDD LPS
808 20	2	27.1418	27.1477	27.1447	2.44576	5.44813	2	19.5721	19.7229	19.6475	-0.141161	0.906789	6.00815	KO IDD LPS
		34.7059		29.5905				34.7826		19.5064
807 808	Liver	Fig 1.I
SOCS3/RPL 19	Efficiency target	Target Ct 1	Target Ct 2	Target Ct	Delta Ct target	Numerator	Efficiency refer.	Refer. Ct 1	Refer. Ct 2	Refer. Ct	Delta Ct refer.	Denominator	Fold Induction	SOCS3/RPL 19
807 1	2	28.6026	29.2155	28.909	-0.0575981	0.960862	2	19.8143	19.9806	19.8975	-0.391107	0.762544	1.26007	WT CT
807 2	2	29.5017	29.3896	29.4457	-0.594213	0.662405	2	20.5882	20.2392	20.4137	-0.907349	0.533164	1.24241	WT CT
807 3	2	28.8761	28.848	28.8621	-0.0106525	0.992643	2	18.8811	18.8546	18.8679	0.638508	1.55672	0.637651	WT CT
807 4	2	29.2138	28.5822	28.898	-0.0465765	0.968231	2	19.2224	19.2528	19.2376	0.268762	1.20477	0.803663	WT CT
808 1	2	29.1106	29.1378	29.1242	-0.272738	0.827747	2	19.5553	19.5251	19.5402	-0.0338086	0.976838	0.847374	WT CT
808 2	2	28.5709	28.3719	28.4714	0.380007	1.30135	2	19.3994	19.5302	19.4648	0.041567	1.02923	1.26439	WT CT
808 3	2	28.1803	28.319	28.2497	0.601771	1.51758	2	19.1303	19.1156	19.1229	0.383429	1.30444	1.1634	WT CT
808 24	2	24.4671	24.5349	24.501	4.35047	20.3996	2	18.9201	18.9075	18.9138	0.592595	1.50796	13.528	WT LPS
808 25	2	24.7779	24.7519	24.7649	4.08656	16.9893	2	19.4315	19.5919	19.5117	-0.00530325	0.996331	17.0519	WT LPS
808 31	2	24.1933	24.1629	24.1781	4.67334	25.5162	2	18.7054	18.6436	18.6745	0.831853	1.77997	14.3352	WT LPS
808 32	2	23.7644	23.8359	23.8001	5.05129	33.1581	2	18.363	18.3782	18.3706	1.13579	2.19739	15.0898	WT LPS
807 58	2	28.1969	28.3127	28.2548	0.596612	1.51216	2	18.9342	18.9966	18.9654	0.540942	1.45492	1.03934	WT CID
807 59	2	29.48	29.7533	29.6166	-0.765185	0.588378	2	18.9543	18.9388	18.9466	0.559813	1.47408	0.39915	WT CID
807 60	2	29.6109	29.9875	29.7992	-0.947777	0.518431	2	19.032	19.0139	19.0229	0.483428	1.39806	0.370821	WT CID
807 61	2	29.7795	29.1751	29.4773	-0.625815	0.648053	2	19.2369	19.1684	19.2027	0.303713	1.23432	0.52503	WT CID
808 26	2	24.7251	24.8103	24.7677	4.08378	16.9567	2	19.2326	19.1391	19.1858	0.320523	1.24878	13.5785	WT CID LPS
808 27	2	25.3222	25.4006	25.3614	3.49004	11.2359	2	19.4232	19.4598	19.4415	0.0648786	1.046	10.7418	WT CID LPS
808 28	2	25.7027	25.9833	25.843	3.00844	8.04692	2	19.5603	19.4794	19.5198	-0.0134667	0.990709	8.12238	WT CID LPS
808 29	2	25.411	25.6378	25.5244	3.32705	10.0355	2	19.7994	19.7269	19.7631	-0.256763	0.836964	11.9904	WT CID LPS
808 30	2	25.5511		25.5511	3.30034	9.85147	2	19.1865	19.2896	19.238	0.268335	1.20442	8.17945	WT CID LPS
808 4	2	28.2194	28.4803	28.3498	0.501591	1.41577	2	18.8945	20.4448	19.6697	-0.163296	0.892983	1.58544	KO ND
808 5	2	28.6777	29.266	28.9719	-0.120424	0.919917	2	20.7296	20.4524	20.591	-1.08467	0.471501	1.95104	KO ND
808 6	2	29.5949	29.8029	29.6989	-0.847486	0.555753	2	19.8562	19.6536	19.7549	-0.248543	0.841746	0.660238	KO ND
808 7	2	29.2686	29.4238	29.3462	-0.49474	0.709689	2	18.9891	19.0222	19.0057	0.500689	1.41489	0.501587	KO ND
808 8	2	29.2115	29.4434	29.3275	-0.476012	0.718962	2	18.9484	19.0638	19.0061	0.500259	1.41447	0.508292	KO ND
808 9	2	25.614	25.8626	25.7383	3.11316	8.65276	2	18.869	18.9237	18.8963	0.610018	1.52628	5.66919	KO ND LPS
808 10	2	24.8329	25.1948	25.0138	3.83764	14.2969	2	19.2091	21.2888	20.249	-0.742598	0.597662	23.9215	KO ND LPS
808 11	2	25.3172	25.5644	25.4408	3.41062	10.634	2	21.4716	19.8725	20.6721	-1.16572	0.445741	23.857	KO ND LPS
808 12	2	25.2599	24.66	24.9599	3.89149	14.8408	2	19.2746	19.0919	19.1833	0.32309	1.25101	11.8631	KO ND LPS
808 13	2	25.6923	25.5143	25.6033	3.24814	9.5014	2	19.3058	19.1291	19.2174	0.288937	1.22174	7.77695	KO ND LPS
808 14	2	25.3073	24.9382	25.1228	3.72867	13.2569	2	19.0376	18.9838	19.0107	0.495659	1.40996	9.40226	KO ND LPS
808 15	2	30.5488	30.6915	30.6201	-1.7687	0.293473	2	19.6186	19.6236	19.6211	-0.114728	0.923557	0.317764	KO IDD
808 16	2	29.7496	30.1204	29.935	-1.08353	0.471872	2	19.1353	19.404	19.2697	0.236707	1.1783	0.400469	KO IDD
807 21	2	28.9364	28.4781	28.7073	0.144166	1.10509	2	19.633	19.3784	19.5057	0.000676291	1.00047	1.10457	KO IDD
807 22	2	29.6242	29.32	29.4721	-0.620655	0.650376	2	19.1382	19.3401	19.2391	0.267228	1.20349	0.540406	KO IDD
807 23	2	29.9901	29.8679	29.929	-1.07753	0.473838	2	19.2801	19.4526	19.3663	0.140054	1.10195	0.430001	KO IDD
807 34	2	29.8492		29.8492	-0.997736	0.500785	2	19.2364	19.2758	19.2561	0.250227	1.18939	0.421042	KO IDD
807 35	2	29.5	29.4271	29.4635	-0.612073	0.654256	2	19.4144	19.4307	19.4226	0.08381	1.05981	0.617331	KO IDD
808 17	2	24.5056	24.3941	24.4499	4.40157	21.1351	2	19.6089	19.8974	19.7531	-0.246783	0.842774	25.078	KO IDD LPS
808 18	2	24.5598	24.4839	24.5218	4.32961	20.1068	2	19.9219	19.402	19.6619	-0.155562	0.897782	22.3961	KO IDD LPS
808 19	2	24.7772	24.7562	24.7667	4.08473	16.9679	2	19.1825	19.1045	19.1435	0.362846	1.28596	13.1947	KO IDD LPS
808 20	2	24.9507	24.9105	24.9306	3.92085	15.1458	2	19.5721	19.7229	19.6475	-0.141161	0.906789	16.7027	KO IDD LPS
		35.4954		28.8514				34.7826		19.5064
		35.556
807 808	Liver	Fig 1.H
ID1/RPL 19	Efficiency target	Target Ct 1	Target Ct 2	Target Ct	Delta Ct target	Numerator	Efficiency refer.	Refer. Ct 1	Refer. Ct 2	Refer. Ct	Delta Ct refer.	Denominator	Fold Induction	ID1/RPL 19
807 1	2	23.3719	23.6931	23.5325	-0.568741	0.674205	2	19.8143	19.9806	19.8975	-0.391107	0.762544	0.884152	WT CT
807 2	2	23.4514	23.6937	23.5725	-0.608775	0.655753	2	20.5882	20.2392	20.4137	-0.907349	0.533164	1.22993	WT CT
807 3	2	22.7856	22.9086	22.8471	0.116654	1.08422	2	18.8811	18.8546	18.8679	0.638508	1.55672	0.696476	WT CT
807 4	2	21.8261	21.7685	21.7973	1.16644	2.24457	2	19.2224	19.2528	19.2376	0.268762	1.20477	1.86307	WT CT
808 1	2	23.4076	23.5717	23.4896	-0.525899	0.694526	2	19.5553	19.5251	19.5402	-0.0338086	0.976838	0.710994	WT CT
808 2	2	22.7735	22.7281	22.7508	0.212911	1.15902	2	19.3994	19.5302	19.4648	0.041567	1.02923	1.12611	WT CT
808 3	2	22.6491	22.8636	22.7563	0.207409	1.15461	2	19.1303	19.1156	19.1229	0.383429	1.30444	0.885142	WT CT
808 24	2	23.1882	22.8113	22.9998	-0.0360287	0.975336	2	18.9201	18.9075	18.9138	0.592595	1.50796	0.646793	WT LPS
808 25	2	23.5087	23.6262	23.5675	-0.603717	0.658056	2	19.4315	19.5919	19.5117	-0.00530325	0.996331	0.66048	WT LPS
808 31	2	22.5476	22.6191	22.5834	0.380365	1.30167	2	18.7054	18.6436	18.6745	0.831853	1.77997	0.731288	WT LPS
808 32	2	22.7659	22.8039	22.7849	0.178809	1.13195	2	18.363	18.3782	18.3706	1.13579	2.19739	0.515134	WT LPS
807 58	2	18.9856	19.3304	19.158	3.80577	13.9846	2	18.9342	18.9966	18.9654	0.540942	1.45492	9.61192	WT CID
807 59	2	18.9543	19.2458	19.1001	3.86368	14.5574	2	18.9543	18.9388	18.9466	0.559813	1.47408	9.87563	WT CID
807 60	2	18.7828	18.7063	18.7446	4.21919	18.6252	2	19.032	19.0139	19.0229	0.483428	1.39806	13.3222	WT CID
807 61	2	19.1952	19.0617	19.1284	3.8353	14.2738	2	19.2369	19.1684	19.2027	0.303713	1.23432	11.5641	WT CID
808 26	2	19.5852	19.7217	19.6535	3.31027	9.91953	2	19.2326	19.1391	19.1858	0.320523	1.24878	7.94335	WT CID LPS
808 27	2	21.881	22.1507	22.0159	0.947868	1.92902	2	19.4232	19.4598	19.4415	0.0648786	1.046	1.84419	WT CID LPS
808 28	2	20.9618		20.9618	2.00195	4.00541	2	19.5603	19.4794	19.5198	-0.0134667	0.990709	4.04297	WT CID LPS
808 29	2	20.3322		20.3322	2.63156	6.19694	2	19.7994	19.7269	19.7631	-0.256763	0.836964	7.40408	WT CID LPS
808 30	2	21.6747		21.6747	1.28901	2.4436	2	19.1865	19.2896	19.238	0.268335	1.20442	2.02887	WT CID LPS
808 4	2	23.3337		23.3337	-0.369967	0.7738	2	18.8945	20.4448	19.6697	-0.163296	0.892983	0.866534	KO ND
808 5	2	23.2036		23.2036	-0.239858	0.846829	2	20.7296	20.4524	20.591	-1.08467	0.471501	1.79603	KO ND
808 6	2	24.8124	25.5	25.1562	-2.19242	0.218784	2	19.8562	19.6536	19.7549	-0.248543	0.841746	0.259917	KO ND
808 7	2	22.7528	23.2263	22.9895	-0.0258072	0.982271	2	18.9891	19.0222	19.0057	0.500689	1.41489	0.694239	KO ND
808 8	2	24.8288	24.3647	24.5967	-1.63299	0.322419	2	18.9484	19.0638	19.0061	0.500259	1.41447	0.227944	KO ND
808 9	2	26.8467	24.2787	25.5627	-2.59897	0.165056	2	18.869	18.9237	18.8963	0.610018	1.52628	0.108143	KO ND LPS
808 10	2	28.1071	26.0208	27.0639	-4.10018	0.0583072	2	19.2091	21.2888	20.249	-0.742598	0.597662	0.0975589	KO ND LPS
808 11	2	28.7599	28.5635	28.6617	-5.69799	0.0192634	2	21.4716	19.8725	20.6721	-1.16572	0.445741	0.0432166	KO ND LPS
808 12	2	28.5164	27.9595	28.2379	-5.27421	0.0258407	2	19.2746	19.0919	19.1833	0.32309	1.25101	0.0206559	KO ND LPS
808 13	2	24.7878	23.9184	24.3531	-1.38936	0.381734	2	19.3058	19.1291	19.2174	0.288937	1.22174	0.312451	KO ND LPS
808 14	2	22.8024	22.2776	22.54	0.423742	1.3414	2	19.0376	18.9838	19.0107	0.495659	1.40996	0.951373	KO ND LPS
808 15	2	25.4177	24.9422	25.18	-2.21622	0.215204	2	19.6186	19.6236	19.6211	-0.114728	0.923557	0.233017	KO IDD
808 16	2	23.9731	23.8648	23.919	-0.955244	0.515754	2	19.1353	19.404	19.2697	0.236707	1.1783	0.437711	KO IDD
807 21	2	23.9309	23.9135	23.9222	-0.958451	0.514609	2	19.633	19.3784	19.5057	0.000676291	1.00047	0.514368	KO IDD
807 22	2	24.1715	24.0077	24.0896	-1.12583	0.458238	2	19.1382	19.3401	19.2391	0.267228	1.20349	0.380756	KO IDD
807 23	2	25.5337	24.3377	24.9357	-1.972	0.2549	2	19.2801	19.4526	19.3663	0.140054	1.10195	0.231318	KO IDD
807 34	2	25.3133	23.8864	24.5998	-1.63609	0.321727	2	19.2364	19.2758	19.2561	0.250227	1.18939	0.270496	KO IDD
807 35	2	24.5605	24.467	24.5138	-1.55003	0.341502	2	19.4144	19.4307	19.4226	0.08381	1.05981	0.322229	KO IDD
808 17	2	24.5803	24.5855	24.5829	-1.61918	0.325521	2	19.6089	19.8974	19.7531	-0.246783	0.842774	0.38625	KO IDD LPS
808 18	2	23.7956	23.7914	23.7935	-0.829759	0.562623	2	19.9219	19.402	19.6619	-0.155562	0.897782	0.626681	KO IDD LPS
808 19	2	23.3355	23.3356	23.3356	-0.371816	0.772809	2	19.1825	19.1045	19.1435	0.362846	1.28596	0.600959	KO IDD LPS
808 20	2	24.5855	24.637	24.6113	-1.64754	0.319183	2	19.5721	19.7229	19.6475	-0.141161	0.906789	0.351993	KO IDD LPS
		37.1469		22.9637				34.7826		19.5064
		Undetermined
807 808	Liver	Fig 1.K
FPN-IRE/RPL 19	Efficiency target	Target Ct 1	Target Ct 2	Target Ct	Delta Ct target	Numerator	Efficiency refer.	Refer. Ct 1	Refer. Ct 2	Refer. Ct	Delta Ct refer.	Denominator	Fold Induction	FPN-IRE/RPL 19
807 1	2	29.0949	29.1723	29.1336	-0.525609	0.694666	2	21.4448	21.3994	21.4221	-0.371447	0.773007	0.898654	WT CT
807 2	2	29.4232	29.4086	29.4159	-0.807862	0.571228	2	21.8504	21.8268	21.8386	-0.787974	0.579157	0.986309	WT CT
807 3	2	27.5249	27.2883	27.4066	1.20143	2.29968	2	20.6419	20.6356	20.6387	0.411933	1.33047	1.72847	WT CT
807 4	2	28.5777	28.5143	28.546	0.0619854	1.0439	2	20.8411	20.7743	20.8077	0.242923	1.18339	0.882129	WT CT
808 1	2	28.8881	28.6731	28.7806	-0.172563	0.887265	2	20.9396	21.1947	21.0671	-0.016457	0.988658	0.897444	WT CT
808 2	2	28.5255	28.6396	28.5826	0.0254263	1.01778	2	20.9904	21.0104	21.0004	0.0502582	1.03545	0.982935	WT CT
808 3	2	28.4912	28.2904	28.3908	0.21719	1.16247	2	20.5616	20.5982	20.5799	0.470763	1.38584	0.838817	WT CT
808 24	2	30.1953	29.9472	30.0713	-1.46327	0.36267	2	20.4168	20.4311	20.424	0.626695	1.54402	0.234886	WT LPS
808 25	2	30.7598	31.1486	30.9542	-2.34618	0.196666	2	20.9735	21.0022	20.9878	0.0628153	1.0445	0.188287	WT LPS
808 31	2	29.8486	29.6073	29.728	-1.11996	0.460108	2	20.3089	20.1324	20.2206	0.830024	1.77772	0.25882	WT LPS
808 32	2	30.3295	29.9296	30.1295	-1.52154	0.348314	2	19.9358	19.96	19.9479	1.10272	2.14759	0.162188	WT LPS
807 58	2	26.9084	27.2175	27.0629	1.54507	2.91818	2	20.6297	20.5636	20.5966	0.454044	1.36987	2.13025	WT CID
807 59	2	26.6489	26.9029	26.7759	1.83207	3.56047	2	20.6152	20.7639	20.6895	0.361122	1.28442	2.77203	WT CID
807 60	2	27.0933	26.9064	26.9998	1.60817	3.04865	2	20.6739	20.6542	20.664	0.386653	1.30736	2.33192	WT CID
807 61	2	26.7471	26.5806	26.6639	1.94411	3.84801	2	20.3826	20.416	20.3993	0.651354	1.57064	2.44996	WT CID
808 26	2	30.1074	29.6834	29.8954	-1.28743	0.40968	2	20.3351	20.3335	20.3343	0.71636	1.64303	0.249344	WT CID LPS
808 27	2	31.3907	30.8044	31.0976	-2.48956	0.178061	2	20.9481	20.9427	20.9454	0.105256	1.07569	0.165533	WT CID LPS
808 28	2	30.3751	30.6942	30.5346	-1.9266	0.263048	2	21.1135	21.1373	21.1254	-0.0747332	0.949518	0.277033	WT CID LPS
808 29	2	30.4908	30.8888	30.6898	-2.08175	0.236227	2	21.2477	21.1213	21.1845	-0.133847	0.911398	0.259192	WT CID LPS
808 30	2	30.8715	30.4612	30.6663	-2.05832	0.240096	2	20.9288	20.9413	20.935	0.115646	1.08346	0.221601	WT CID LPS
808 4	2	26.4182	26.5088	26.4635	2.14447	4.42131	2	20.4501	20.9273	20.6887	0.36198	1.28519	3.4402	KO ND
808 5	2	27.1939	27.0059	27.0999	1.50808	2.84432	2	21.5431	21.0003	21.2717	-0.221041	0.857946	3.31527	KO ND
808 6	2	27.609	27.7069	27.6579	0.950073	1.93197	2	20.9905	20.9418	20.9662	0.0844942	1.06032	1.82207	KO ND
808 7	2	27.0953	27.2311	27.1632	1.44479	2.72224	2	20.4976	20.5677	20.5327	0.518	1.43197	1.90104	KO ND
808 8	2	26.5308	26.6197	26.5753	2.03273	4.09179	2	20.3857	20.3176	20.3517	0.698993	1.62337	2.52055	KO ND
808 9	2	28.925	28.8597	28.8923	-0.284339	0.821117	2	20.3212	20.3291	20.3252	0.725474	1.65344	0.49661	KO ND LPS
808 10	2	29.3957	29.1972	29.2965	-0.688469	0.620512	2	20.8101	21.2527	21.0314	0.0192533	1.01343	0.612286	KO ND LPS
808 11	2	30.3638	30.0913	30.2276	-1.61959	0.325429	2	21.3295	20.9545	21.142	-0.0913071	0.938672	0.346691	KO ND LPS
808 12	2	29.7162	29.7022	29.7092	-1.10119	0.466132	2	20.9776	20.9113	20.9445	0.106186	1.07638	0.433055	KO ND LPS
808 13	2	30.1601	30.4939	30.327	-1.71899	0.303761	2	20.7647	20.7048	20.7348	0.315883	1.24477	0.244029	KO ND LPS
808 14	2	30.3529	30.2681	30.3105	-1.70248	0.307258	2	20.9711	20.9371	20.9541	0.0965372	1.0692	0.28737	KO ND LPS
808 15	2	28.0601	27.9523	28.0062	0.60184	1.51765	2	21.132	21.1558	21.1439	-0.0932354	0.937418	1.61897	KO IDD
808 16	2	27.526	27.4187	27.4724	1.13565	2.19717	2	20.7339	20.7633	20.7486	0.302099	1.23294	1.78207	KO IDD
807 21	2	28.6569	28.6784	28.6677	-0.0596538	0.959494	2	20.7971	20.7965	20.7968	0.253856	1.19239	0.804682	KO IDD
807 22	2	27.5637	27.5829	27.5733	1.0347	2.04868	2	20.5139	20.4081	20.461	0.589669	1.5049	1.36134	KO IDD
807 23	2	27.7242	27.7204	27.7223	0.885725	1.84769	2	20.93	20.8402	20.8851	0.165554	1.1216	1.64738	KO IDD
807 34	2	27.7112	27.9371	27.8242	0.783849	1.72172	2	20.3448	20.3371	20.3409	0.70971	1.63548	1.05273	KO IDD
807 35	2	26.8337	26.9544	26.894	1.71396	3.28061	2	20.1641	20.204	20.184	0.866611	1.82337	1.7992	KO IDD
808 17	2	30.6503	30.613	30.6317	-2.02365	0.245935	2	21.0277	21.0582	21.043	0.00769956	1.00535	0.244626	KO IDD LPS
808 18	2	30.4801	30.5606	30.5204	-1.91234	0.26566	2	20.909	20.9293	20.9192	0.131501	1.09543	0.242516	KO IDD LPS
808 19	2	29.4465	30.1027	29.7746	-1.16661	0.445466	2	20.9514	20.955	20.9532	0.0974727	1.0699	0.416363	KO IDD LPS
808 20	2	29.9786	29.834	29.9063	-1.29825	0.406619	2	21.1495	21.1026	21.1261	-0.0754303	0.949059	0.428445	KO IDD LPS
		36.1748		28.608				36.8621		21.0507
