# Supplementary material for: A crosstalk between hepcidin and IRE/IRP pathways controls ferroportin expression and determines serum iron levels in mice
Source: eLife. 2022 Sep 6;11:e81332. doi: 10.7554/eLife.81332 (PMC9499557; doi:10.7554/eLife.81332)
Supplement: Figure 2—source data 2. [file elife-81332-fig2-data2.xlsx]

## Sheet: 808 Serum NTBI
														Average -Def	Average +Def	Zeroed -Def	Zeroed +Def
Measurement count: 1 Ex: 485 Em: 527 Scaling Factor : 1/1																					C/C -Deferiprone																									810
	1	2	3	4	5	6	7	8	9	10	11	12									Time (min)	16	18	20	22	24	26	28	30	32	34	36	38	40	Slope Fxn	Fe (uM)	Slopes -Def	Slopes +Def	Difference	Mcalibr	Samples Slopes -Def	Samples Slopes +Def	LPI (uM)
A	28.57	29.76	42.34	41.03	44.02	42.55	44.28	42.71	44.2	42.42	44.39	42.25		28.57	29.76	0	0					-0.25	-0.19	-0.1	-0.03	0.09	0.14	0.23	0.27	0.4	0.41	0.52	0.55	0.66	0.0376648	0	0.0376648	0.027967	0.0096978	0.0507295	0.0679121	0.102967	0		0.165931	WT ND
B	28.73	29.92	43.29	41.42	44.68	42.74	43.44	41.52	41.27	39.66	40.53	36.66		28.73	29.92	0	0					0.04	0.1	0.17	0.19	0.21	0.31	0.44	0.4	0.57	0.53	0.67	0.67	0.74	0.0298901	0.078125	0.0298901	0.0237363			0.0372527	0.000879121	0.717012
C	28.88	30.32	44.85	42.98	45.3	45.45	41.9	40.44	42.91	41.73	46.7	40.49		28.88	30.32	0	0					0.11	0.05	0.18	0.24	0.3	0.35	0.49	0.4	0.56	0.63	0.72	0.78	0.9	0.0337637	0.15625	0.0337637	0.0233516			-0.0202747	-0.00662088	0
D	28.78	29.79	45.04	43.37	43.72	42.43	44.51	42.49	43.55	41.83	42.74	40.3		28.78	29.79	0	0					0.17	0.23	0.37	0.43	0.53	1.13	0.76	0.65	1.53	0.83	1.19	1.09	1.45	0.0493956	0.3125	0.0493956	0.0248077	0.0245879		-0.0533516	-0.0590659	0.112642
E	28.64	29.97	45.61	43.44	43.6	43.35	43.91	42.93	43.79	43.49	43.3	41.87		28.64	29.97	0	0					0.77	0.9	1.05	1.27	1.37	1.47	1.69	1.82	2.01	2.18	2.42	2.53	2.72	0.0815659	0.625	0.0815659	0.0279396	0.0536264		-0.153049	-0.0642582	0
F	28.93	30.09	46.4	44.35	45.86	43.41	40.15	37.3	44.78	44.05	44.38	42.32		28.93	30.09	0	0					1.3	1.53	1.74	1.99	2.21	2.53	2.69	2.79	3.15	3.53	3.6	4.01	4.51	0.125989	1.25	0.125989	0.0469231	0.0790659		-0.0252198	-0.0151099	0		0.22106	WT ND LPS
G	29.5	30.33	44.77	44.98	45.3	42.71	44.83	42.32	46.36	42.15	42.77	41.1		29.5	30.33	0	0					2.57	2.42	3.34	3.92	4.42	3.76	4.57	4.79	5.39	5.85	6.52	7.03	8.01	0.212005	2.5	0.212005	0.0575549	0.154451		-0.065467	-0.055467	0
H	29.82	29.36	46.11	42.57	43.21	41.47	46.42	43.41	42.68	41.53	44.22	42.59		29.82	29.36	0	0					3.73	4.58	5.37	6.19	7.03	7.77	8.75	9.44	10.04	10.57	11.21	11.56	12.25	0.35772	5	0.35772	0.0952198	0.2625		-0.094533	-0.0471978	0
Measurement count: 2 Ex: 485 Em: 527 Scaling Factor : 1/1																																									0.018544	-0.000549451	0.376377
	1	2	3	4	5	6	7	8	9	10	11	12																													0.0765385	0.0395604	0.728926
A	28.37	28.98	41.74	40.44	43.37	41.76	44.28	42.1	43.75	41.57	44.17	41.89		28.37	28.98	-0.2	-0.78																								-0.0234341	0.0298077	0		0.756978	WT CID
B	28.23	29.12	43.22	41.16	43.69	42.13	42.97	40.93	40.77	38.98	40.04	36.34		28.23	29.12	-0.5	-0.8																								0.0394231	0.000164835	0.773874
C	28.46	29.54	44.49	42.37	44.25	41.96	41.17	39.76	42.84	41.23	45.21	40.78		28.46	29.54	-0.42	-0.78																								0.014533	-0.0351648	0.979663
D	28.34	29.1	44.46	44.27	42.8	41.53	43.48	41.6	43.05	41.17	42.45	40		28.34	29.1	-0.44	-0.69																								0.107363	0.0441209	1.24665
E	28.44	30.19	45.1	42.91	43.21	42.22	43.18	41.63	43.06	41.84	43.05	41.13		28.44	30.19	-0.2	0.22																								-0.00425824	-0.0440659	0.784705
F	28.95	29.43	45.53	43.43	44.55	42.42	39.46	36.66	43.73	42.27	43.67	41.73		28.95	29.43	0.02	-0.66																								0.018022	-0.0261264	0.87027		0.560829	WT CID LPS
G	29.36	29.78	44.86	42.85	44.47	42.41	44.9	42.72	44.39	41.87	42.52	41.11		29.36	29.78	-0.14	-0.55																								0.0123901	-0.0221703	0.681269
H	29.78	29.24	44.71	42.15	42.81	41.02	46.59	43.28	42.82	41.59	42.54	42.73		29.78	29.24	-0.04	-0.12																								0.0167857	-0.00692308	0.467357
Measurement count: 3 Ex: 485 Em: 527 Scaling Factor : 1/1																																									0.0626923	0.0228571	0.785247
	1	2	3	4	5	6	7	8	9	10	11	12																													-0.0531868	-0.0400275	0
A	27.69	27.84	40.36	39	41.77	40.2	44.47	41.57	44.12	40.91	44.58	40.48		27.69	27.84	-0.88	-1.92																								-0.00532967	-0.0790934	1.45406		0.967532	KO ND
B	27.63	27.79	45.02	41.95	41.99	40.43	43.1	40.47	41	38.64	38.78	34.94		27.63	27.79	-1.1	-2.13																								0.119396	0.0775	0.825863
C	27.92	28.1	45.03	42.02	42	39.88	39.4	38.03	42.94	41.62	42.92	38.45		27.92	28.1	-0.96	-2.22																								0.00247253	-0.0372527	0.783081
D	27.81	27.73	45	43	40.59	39.19	42.71	40.76	43.14	41.39	42.38	39.84		27.81	27.73	-0.97	-2.06																								-0.00178571	-0.0541484	1.03219
E	28.03	27.9	45.28	42.8	42.7	40.86	43.56	41.47	43.2	41.52	43.04	41.21		28.03	27.9	-0.61	-2.07																								0.0538462	0.0161813	0.742464
F	28.52	27.79	45.3	41.84	42.02	40.17	38.16	35.51	42.71	40.81	41.87	39.48		28.52	27.79	-0.41	-2.3																								0.0057967	-0.0251099	0.609243		0.526061	KO ND LPS
G	29.22	28.09	45.03	43.09	42.85	40.72	44.66	42.78	44.79	41.99	42.63	41.11		29.22	28.09	-0.28	-2.24																								0.041978	0.0242857	0.348758
H	30.12	28.22	44.86	41.91	42.86	41.02	46.95	43.67	43.21	41.58	41.42	39.8		30.12	28.22	0.3	-1.14																								-0.079011	-0.0351648	0
Measurement count: 4 Ex: 485 Em: 527 Scaling Factor : 1/1																																									-0.010989	-0.00898352	0
	1	2	3	4	5	6	7	8	9	10	11	12																													0.0436538	-0.0411813	1.6723
A	27.88	27.9	40.31	38.78	41.61	40.24	44.37	41.41	43.82	41.16	44.41	40.36		27.88	27.9	-0.69	-1.86																								-0.00211538	-0.0395055	0.737049		0.333594	KO IDD
B	27.88	27.85	45.29	41.97	41.87	40.21	43.02	40.49	40.82	38.54	38.59	34.77		27.88	27.85	-0.85	-2.07																								0.0178297	-0.0031044	0.412661
C	28.05	28.27	44.01	42.27	41.88	39.74	39.17	37.77	42.89	41.16	42.73	38.18		28.05	28.27	-0.83	-2.05																								-0.026511	0.0298901	0
D	27.89	27.86	44.55	42.8	40.5	39.04	42.87	40.82	43.04	41.11	42.25	39.68		27.89	27.86	-0.89	-1.93																								0.0343407	0.0309066	0.0676937
E	28.23	27.99	45	42.32	42.9	40.83	43.35	41.22	43.06	41.51	43.01	40.9		28.23	27.99	-0.41	-1.98																								0.0670879	0.0442308	0.450569
F	28.7	27.83	45.67	41.76	41.6	39.86	37.82	35.1	42.62	40.52	41.71	39.21		28.7	27.83	-0.23	-2.26																								-0.00123626	-0.042033	0.804201		0.458259	KO IDD LPS
G	29.47	28.08	47.09	43.16	42.9	40.64	45.06	42.85	44.68	41.75	42.58	40.78		29.47	28.08	-0.03	-2.25																								-0.00326923	-0.0394231	0.712679
H	30.56	28.04	44.87	42.19	42.44	40.37	46.71	43.27	43.31	41.5	40.92	40.03		30.56	28.04	0.74	-1.32																								-0.0136538	0.0458242	0
Measurement count: 5 Ex: 485 Em: 527 Scaling Factor : 1/1																																									-0.0309615	-0.0538462	0.451111
	1	2	3	4	5	6	7	8	9	10	11	12																													0.0128297	-0.00357143	0.323305
A	27.91	27.94	39.86	38.61	41.22	39.81	43.98	41.16	44.22	41.52	43.65	39.54		27.91	27.94	-0.66	-1.82
B	28.23	27.96	43.35	41.93	41.19	39.87	42.76	39.98	40.93	38.16	38.31	34.39		28.23	27.96	-0.5	-1.96																										*Added controls from 809 to final figure.
C	28.4	28.25	44.25	42.04	42.28	39.38	38.68	37.35	43.04	41.15	42.02	37.77		28.4	28.25	-0.48	-2.07
D	28.29	27.9	45.25	42.59	40.11	38.51	42.67	40.61	44.18	41.46	42.57	39.72		28.29	27.9	-0.49	-1.89
E	28.63	28.15	46.18	42.5	42.93	40.69	43.45	42.52	43.17	41.52	43	40.99		28.63	28.15	-0.01	-1.82				C/C +Deferiprone
F	29.18	28.01	45.56	41.82	41.51	39.5	38.81	35.54	40.72	39.86	41.87	38.89		29.18	28.01	0.25	-2.08				Time (min)	16	18	20	22	24	26	28	30	32	34	36	38	40	Slope Fxn	Fe (uM)
G	30.27	28.22	45.06	42.9	42.93	40.62	45.39	42.97	44.69	41.69	42.45	40.76		30.27	28.22	0.77	-2.11					-1.39	-1.34	-1.18	-1.23	-1.08	-1.08	-0.92	-0.95	-0.89	-0.86	-0.74	-0.82	-0.69	0.027967	0
H	31.18	28.11	44.77	42.22	42.14	40.41	46.6	43.13	43.47	41.73	41.21	39.33		31.18	28.11	1.36	-1.25					-1.56	-1.56	-1.4	-1.41	-1.28	-1.25	-1.22	-1.24	-1.04	-1.16	-1.07	-1.1	-0.93	0.0237363	0.078125
Measurement count: 6 Ex: 485 Em: 527 Scaling Factor : 1/1																						-1.52	-1.45	-1.39	-1.37	-1.3	-1.07	-1.12	-1.23	-0.84	-1.07	-1.05	-1.11	-0.89	0.0233516	0.15625
	1	2	3	4	5	6	7	8	9	10	11	12										-1.39	-1.32	-1.21	-1.15	-1.13	-1.09	-0.96	-0.95	-0.93	-0.92	-0.82	-0.84	-0.75	0.0248077	0.3125
A	28.08	27.93	39.77	38.22	41	39.51	44.12	41.29	44.03	41.36	43.75	39.15		28.08	27.93	-0.49	-1.83					-1.32	-1.26	-1.16	-1.16	-1.04	-1.08	-0.94	-0.89	-0.85	-0.85	-0.74	-0.81	-0.53	0.0279396	0.625
B	28.38	28.01	43.5	42.02	41.13	39.61	42.66	40.19	40.88	38.46	38.26	34.28		28.38	28.01	-0.35	-1.91					-1.62	-1.57	-1.49	-1.51	-1.32	-1.28	-0.86	-0.96	-0.91	-0.94	-0.78	-0.72	-0.43	0.0469231	1.25
C	28.6	28.3	44.33	42.21	42.48	39.21	38.45	37.21	43.24	41.1	41.85	37.93		28.6	28.3	-0.28	-2.02					-1.68	-1.38	-1.5	-1.43	-1.35	-1.03	-0.98	-0.88	-0.74	-0.7	-0.43	-0.39	-0.32	0.0575549	2.5
D	28.43	28	45.21	42.55	40.07	38.4	43.01	41	44.12	41.44	42.32	39.6		28.43	28	-0.35	-1.79					-0.65	-0.51	-0.49	-0.32	-0.15	-0.04	0.09	0.32	0.84	0.68	1.42	1.57	1.23	0.0952198	5
E	28.86	28.23	47.84	42.83	43.11	40.99	43.52	42.54	42.99	41.41	42.92	40.82		28.86	28.23	0.22	-1.74
F	29.45	28.03	45.75	42.22	41.32	39.44	38.46	35.37	40.99	39.52	41.84	38.78		29.45	28.03	0.52	-2.06
G	30.4	28.31	45.12	43.01	43.32	41.09	45.27	42.86	44.54	41.64	42.48	40.52		30.4	28.31	0.9	-2.02
H	31.67	28.23	44.77	42.33	41.83	40.21	46.45	42.9	43.43	41.48	41.66	39.74		31.67	28.23	1.85	-1.13
Measurement count: 7 Ex: 485 Em: 527 Scaling Factor : 1/1
	1	2	3	4	5	6	7	8	9	10	11	12
A	28.18	28.2	39.8	38.11	40.97	39.52	43.25	41.02	44.54	41.66	44.11	38.93		28.18	28.2	-0.39	-1.56
B	28.52	28.22	43.34	41.82	40.8	39.37	42.62	40.02	41.22	38.37	38.58	34.17		28.52	28.22	-0.21	-1.7
C	28.8	28.57	44.79	42.23	42.31	39.06	38.34	37.21	43.11	41.14	42.24	38.19		28.8	28.57	-0.08	-1.75
D	28.71	28.26	45.31	42.95	40.06	38.24	42.83	40.9	44.25	41.23	42.55	39.79		28.71	28.26	-0.07	-1.53
E	29.12	28.47	46.59	42.61	43.06	40.84	43.63	42.69	43.13	41.41	42.96	40.67		29.12	28.47	0.48	-1.5
F	29.67	28.28	46.2	42.51	41.32	39.21	38.81	35.65	40.87	39.27	41.92	39.09		29.67	28.28	0.74	-1.81
G	30.82	28.54	45.17	42.91	43.51	41.69	45.11	42.77	44.47	41.49	42.36	40.36		30.82	28.54	1.32	-1.79
H	32.38	28.4	44.82	42.39	41.86	39.87	46.48	45.14	43.56	41.29	41.68	39.48		32.38	28.4	2.56	-0.96
Measurement count: 8 Ex: 485 Em: 527 Scaling Factor : 1/1
	1	2	3	4	5	6	7	8	9	10	11	12
A	28.17	28.21	40.53	38	40.66	39.24	43.96	41.41	44.59	41.61	44.33	39.01		28.17	28.21	-0.4	-1.55
B	28.64	28.29	43.22	41.87	40.67	39.37	42.6	40.25	40.96	38.56	38.21	34.13		28.64	28.29	-0.09	-1.63
C	28.87	28.66	44.84	42.2	42.85	38.93	38.25	36.88	43.23	41.02	42.17	38.39		28.87	28.66	-0.01	-1.66
D	28.77	28.31	45.24	42.69	40.08	38.1	43.07	40.86	44.03	41.27	42.27	39.36		28.77	28.31	-0.01	-1.48
E	29.27	28.49	48.04	42.91	43.01	41.01	43.57	42.76	42.85	41.5	42.74	40.5		29.27	28.49	0.63	-1.48
F	30.02	28.31	45.85	42.48	41.24	39.24	39.04	35.84	40.96	39.07	42.03	39.11		30.02	28.31	1.09	-1.78
G	31.52	28.47	44.67	42.74	43.53	41.74	44.93	42.71	44.31	41.38	42.17	40.28		31.52	28.47	2.02	-1.86
H	32.92	28.45	44.9	41.89	41.56	39.72	46.37	42.81	43.45	41.1	41.82	40.38		32.92	28.45	3.1	-0.91
Measurement count: 9 Ex: 485 Em: 527 Scaling Factor : 1/1
	1	2	3	4	5	6	7	8	9	10	11	12
A	28.32	28.37	40.82	38.17	40.8	39.28	43.76	41.16	44.89	41.76	44.45	38.86		28.32	28.37	-0.25	-1.39
B	28.77	28.36	43.17	41.69	40.77	39.36	42.46	40.14	41.19	38.63	38.06	34.09		28.77	28.36	0.04	-1.56
C	28.99	28.8	44.92	42.19	42.57	38.73	38.24	36.93	43.2	41.06	42.43	38.59		28.99	28.8	0.11	-1.52
D	28.95	28.4	45.38	42.59	39.98	38.38	43.18	40.76	44.24	41.3	42.48	39.61		28.95	28.4	0.17	-1.39
E	29.41	28.65	45.93	42.45	42.93	40.74	43.55	42.55	43.18	41.33	42.94	40.6		29.41	28.65	0.77	-1.32
F	30.23	28.47	46.24	42.53	41.29	39.28	39.33	36.03	41.15	39.12	42.2	39.11		30.23	28.47	1.3	-1.62
G	32.07	28.65	44.89	42.48	43.74	41.83	44.93	42.59	44.33	41.35	42.03	40.2		32.07	28.65	2.57	-1.68
H	33.55	28.71	44.8	41.96	41.59	39.75	46.55	43.07	43.69	41.22	41.94	40.42		33.55	28.71	3.73	-0.65
Measurement count: 10 Ex: 485 Em: 527 Scaling Factor : 1/1
	1	2	3	4	5	6	7	8	9	10	11	12										Samples - Deferiprone
A	28.38	28.42	41.01	38.14	40.51	38.95	43.95	41.28	45.01	41.86	44.52	39.29		28.38	28.42	-0.19	-1.34					Time (min) ->	16	18	20	22	24	26	28	30	32	34	36	38	40	Slope Fxn
B	28.83	28.36	43.17	41.49	40.63	39.1	42.55	40.17	41.08	38.54	38.75	34.19		28.83	28.36	0.1	-1.56					810.46	40.82	41.01	41.27	41.33	41.41	41.66	41.69	41.89	42	42.11	42.28	42.26	42.6	0.0679121
C	28.93	28.87	44.95	42.19	42.52	38.85	38.27	36.9	43.51	41.05	42.52	38.59		28.93	28.87	0.05	-1.45					810.47	43.17	43.17	43.05	43.07	44.28	43.38	44.61	44.24	43.62	44.21	43.69	44.13	43.71	0.0372527
D	29.01	28.47	45.22	42.63	40.12	38.39	42.8	40.67	44.07	41.21	42.25	39.11		29.01	28.47	0.23	-1.32					810.48	44.92	44.95	44.87	44.58	44.75	44.99	44.7	44.62	44.87	44.52	44.38	44.48	44.46	-0.0202747
E	29.54	28.71	48.2	42.75	42.91	40.9	43.22	40.87	42.84	41.2	42.52	40.21		29.54	28.71	0.9	-1.26					810.49	45.38	45.22	45.26	45.01	45.08	45.47	45.03	44.84	44.85	44.42	44.33	44.08	44.19	-0.0533516
F	30.46	28.52	45.84	42.66	41.48	39.48	39.33	36.07	41.25	38.88	42.16	39.28		30.46	28.52	1.53	-1.57					810.5	45.93	48.2	47.98	46.98	47.42	44.64	44.46	44.57	44.43	43.94	44.04	43.94	45.35	-0.153049
G	31.92	28.95	44.9	42.33	43.7	41.7	44.93	42.4	44.5	41.27	41.82	40.05		31.92	28.95	2.42	-1.38					810.43	46.24	45.84	46.17	45.96	45.92	46.23	45.79	45.66	45.96	45.88	45.48	45.41	45.65	-0.0252198
H	34.4	28.85	46.32	41.78	41.45	39.51	46.52	42.84	43.72	41.29	42.1	40.77		34.4	28.85	4.58	-0.51					810.44	44.89	44.9	44.61	44.76	44.44	44.84	44.55	44.35	44.01	43.81	43.46	43.43	43.61	-0.065467
Measurement count: 11 Ex: 485 Em: 527 Scaling Factor : 1/1																						810.45	44.8	46.32	44.79	44.84	44.76	44.73	44.26	44.14	44.08	43.83	43.56	43.23	43.29	-0.094533
	1	2	3	4	5	6	7	8	9	10	11	12										810.53	40.8	40.51	40.69	40.53	40.65	40.72	40.86	40.84	40.9	40.65	40.85	41.08	41.18	0.018544
A	28.47	28.58	41.27	38.36	40.69	39.03	43.2	40.86	44.86	41.87	44.69	39.28		28.47	28.58	-0.1	-1.18					810.54	40.77	40.63	40.77	40.7	41.04	41.06	41.33	41.65	41.83	41.83	42.08	42.23	42.28	0.0765385
B	28.9	28.52	43.05	41.46	40.77	39.15	42.37	39.98	41.41	38.75	38.85	34.18		28.9	28.52	0.17	-1.4					810.36	42.57	42.52	42.81	42.82	42.66	41.78	42.4	41.87	41.62	42.03	41.67	42.01	43.06	-0.0234341
C	29.06	28.93	44.87	42.13	42.81	38.85	38.33	36.94	43.4	41.01	42.91	38.91		29.06	28.93	0.18	-1.39					810.37	39.98	40.12	40.31	40.36	40.47	40.65	40.93	41.14	40.87	40.99	40.93	40.97	40.72	0.0394231
D	29.15	28.58	45.26	42.61	40.31	38.49	42.71	40.45	44.05	41.21	42.38	39.4		29.15	28.58	0.37	-1.21					810.38	42.93	42.91	42.99	42.89	42.89	43.73	42.54	42.71	42.83	43.81	44.01	42.9	42.87	0.014533
E	29.69	28.81	47.98	42.41	42.99	40.67	43.28	42.08	43.1	41.3	42.91	40.26		29.69	28.81	1.05	-1.16					810.39	41.29	41.48	41.73	41.87	42.19	42.38	42.65	42.55	43.14	43.41	43.71	43.53	43.66	0.107363
F	30.67	28.6	46.17	42.31	41.73	39.73	39.61	36.34	41.55	38.93	42.01	39.33		30.67	28.6	1.74	-1.49					810.4	43.74	43.7	43.81	43.64	43.84	43.72	43.9	43.69	43.88	43.68	43.66	43.74	43.52	-0.00425824
G	32.84	28.83	44.61	41.89	43.81	41.46	44.82	42.5	44.24	41.31	41.97	40.04		32.84	28.83	3.34	-1.5					810.14	41.59	41.45	41.72	41.62	41.58	41.48	41.83	42.63	41.79	41.56	41.89	41.82	42.03	0.018022
H	35.19	28.87	44.79	41.96	41.72	39.57	46.43	43.21	43.86	41.27	41.89	40.6		35.19	28.87	5.37	-0.49					810.15	43.76	43.95	43.2	43.8	43.7	43.74	43.76	44.02	44.03	43.98	43.34	44.12	44.03	0.0123901
Measurement count: 12 Ex: 485 Em: 527 Scaling Factor : 1/1																						810.32	42.46	42.55	42.37	42.33	42.29	42.36	42.5	42.33	42.47	42.66	42.77	42.78	42.8	0.0167857
	1	2	3	4	5	6	7	8	9	10	11	12										810.33	38.24	38.27	38.33	38.42	38.48	38.77	38.89	39.03	39.19	39.14	39.38	39.51	39.67	0.0626923
A	28.54	28.53	41.33	38.61	40.53	38.88	43.8	41.13	45.23	41.94	44.63	39.64		28.54	28.53	-0.03	-1.23					810.34	43.18	42.8	42.71	42.5	42.49	42.1	42.22	41.74	42.07	41.9	41.82	41.68	41.98	-0.0531868
B	28.92	28.51	43.07	41.25	40.7	39.22	42.33	40.1	41.21	38.57	39.53	34.19		28.92	28.51	0.19	-1.41					810.26	43.55	43.22	43.28	43.13	43.3	43.22	43.64	43.26	43.31	43.04	43.16	43.21	43.35	-0.00532967
C	29.12	28.95	44.58	42.08	42.82	38.9	38.42	36.97	43.63	41.04	42.97	38.94		29.12	28.95	0.24	-1.37					810.27	39.33	39.33	39.61	39.43	39.83	39.51	40.36	40.5	40.96	40.65	41.39	41.58	42.36	0.119396
D	29.21	28.64	45.01	42.35	40.36	38.56	42.5	40.41	43.88	41.09	42.07	38.93		29.21	28.64	0.43	-1.15					810.28	44.93	44.93	44.82	44.85	44.92	44.87	44.81	44.65	44.89	44.74	45.01	44.72	45.23	0.00247253
E	29.91	28.81	46.98	42.05	42.89	40.56	43.13	42	42.77	41.11	42.61	39.97		29.91	28.81	1.27	-1.16					810.29	46.55	46.52	46.43	45.98	46.03	46.09	46.29	46.19	46.23	46.09	46.38	46.24	46.57	-0.00178571
F	30.92	28.58	45.96	42.07	41.87	39.69	39.43	36.4	41.96	38.58	41.94	39.33		30.92	28.58	1.99	-1.51					810.3	44.89	45.01	44.86	45.23	45.21	45.21	45.55	45.34	45.64	45.63	45.84	45.98	46.33	0.0538462
G	33.42	28.9	44.76	42.05	43.64	41.25	44.85	42.24	44.29	41.32	41.61	39.85		33.42	28.9	3.92	-1.43					810.5	41.19	41.08	41.41	41.21	41.35	41.35	41.3	41.52	41.44	41.18	41.35	41.21	41.43	0.0057967
H	36.01	29.04	44.84	41.87	41.62	39.37	45.98	42.98	43.82	41.34	42.09	40.58		36.01	29.04	6.19	-0.32					810.6	43.2	43.51	43.4	43.63	43.53	43.58	43.92	43.69	44.17	43.48	44.28	43.91	44.67	0.041978
Measurement count: 13 Ex: 485 Em: 527 Scaling Factor : 1/1																						810.7	44.24	44.07	44.05	43.88	44.04	42.87	42.91	42.8	42.77	42.65	42.75	42.61	42.58	-0.079011
	1	2	3	4	5	6	7	8	9	10	11	12										810.8	43.18	42.84	43.1	42.77	43.07	42.69	43.11	42.73	42.88	42.73	42.89	42.72	42.83	-0.010989
A	28.66	28.68	41.41	38.93	40.65	38.95	43.7	40.89	45.21	41.86	44.85	39.45		28.66	28.68	0.09	-1.08					810.11	41.15	41.25	41.55	41.96	42.27	41.89	42.53	42.23	42.18	42.38	42.39	42.38	42.06	0.0436538
B	28.94	28.64	44.28	41.67	41.04	39.27	42.29	39.8	41.35	38.56	38.37	34.23		28.94	28.64	0.21	-1.28					810.21	44.33	44.5	44.24	44.29	44.25	44.19	44.3	44.2	44.3	44.24	44.34	44.25	44.35	-0.00211538
C	29.18	29.02	44.75	42.1	42.66	38.93	38.48	37.12	43.53	41.14	42.89	39.19		29.18	29.02	0.3	-1.3					810.22	43.69	43.72	43.86	43.82	43.96	43.82	44.06	43.85	44.02	44	44.15	44.06	44.18	0.0178297
D	29.31	28.66	45.08	42.26	40.47	38.48	42.49	40.31	44.04	41.27	42.41	39.6		29.31	28.66	0.53	-1.13					810.23	44.45	44.52	44.69	44.63	44.85	44.78	45.09	44.95	45.27	44.02	45.21	43.31	43.64	-0.026511
E	30.01	28.93	47.42	42.05	42.89	40.37	43.3	42.22	43.07	41.24	42.6	40.11		30.01	28.93	1.37	-1.04					810.24	38.06	38.75	38.85	39.53	38.37	38.77	38.83	39.2	39.14	39.29	39.09	39.38	39.25	0.0343407
F	31.14	28.77	45.92	41.93	42.19	39.63	39.83	36.67	42.27	38.82	42.02	39.55		31.14	28.77	2.21	-1.32					810.25	42.43	42.52	42.91	42.97	42.89	43.05	43.22	43.4	43.33	43.21	44.49	44.55	43.43	0.0670879
G	33.92	28.98	44.44	41.95	43.84	41.29	44.92	42.23	44.25	41.12	41.54	39.9		33.92	28.98	4.42	-1.35					810.16	42.48	42.25	42.38	42.07	42.41	42.3	42.72	42.09	42.34	42.19	42.42	42.15	42.46	-0.00123626
H	36.85	29.21	44.76	41.89	41.58	39.55	46.03	44.43	43.96	41.36	42.32	40.69		36.85	29.21	7.03	-0.15					810.17	42.94	42.52	42.91	42.61	42.6	42.58	42.58	42.41	42.59	42.52	42.83	42.63	42.78	-0.00326923
Measurement count: 14 Ex: 485 Em: 527 Scaling Factor : 1/1																						810.18	42.2	42.16	42.01	41.94	42.02	42.06	42.11	41.61	41.87	41.98	41.79	41.84	41.89	-0.0136538
	1	2	3	4	5	6	7	8	9	10	11	12										810.19	42.03	41.82	41.97	41.61	41.54	41.32	41.39	42.17	41.44	41.64	41.33	41.13	41.03	-0.0309615
A	28.71	28.68	41.66	39.24	40.72	38.93	43.74	40.86	45.21	41.73	44.78	40.05		28.71	28.68	0.14	-1.08					810.2	41.94	42.1	41.89	42.09	42.32	42.2	42.4	42.37	42.15	42.35	42.19	42.12	42.4	0.0128297
B	29.04	28.67	43.38	41.35	41.06	39.21	42.36	40.33	41.35	38.57	38.77	34.22		29.04	28.67	0.31	-1.25
C	29.23	29.25	44.99	42.26	41.78	39.18	38.77	36.91	43.58	40.89	43.05	39.35		29.23	29.25	0.35	-1.07
D	29.91	28.7	45.47	43.57	40.65	38.21	42.1	40.17	42.87	40.83	42.3	38.75		29.91	28.7	1.13	-1.09
E	30.11	28.89	44.64	41.62	43.73	40.55	43.22	40.63	42.69	41.01	42.58	39.78		30.11	28.89	1.47	-1.08					Samples + Deferiprone
F	31.46	28.81	46.23	41.67	42.38	39.89	39.51	36.54	41.89	38.13	42.06	40.22		31.46	28.81	2.53	-1.28					Time (min) ->	16	18	20	22	24	26	28	30	32	34	36	38	40	Slope Fxn
G	33.26	29.3	44.84	41.49	43.72	42.51	44.87	42.11	44.19	40.87	41.32	39.48		33.26	29.3	3.76	-1.03					810.46	38.17	38.14	38.36	38.61	38.93	39.24	39.5	39.55	39.88	39.87	40.18	40.15	40.53	0.102967
H	37.59	29.32	44.73	41.53	41.48	39.23	46.09	42.25	43.82	41.24	42.2	41.26		37.59	29.32	7.77	-0.04					810.47	41.69	41.49	41.46	41.25	41.67	41.35	41.81	41.44	41.55	41.39	41.85	41.2	41.68	0.000879121
Measurement count: 15 Ex: 485 Em: 527 Scaling Factor : 1/1																						810.48	42.19	42.19	42.13	42.08	42.1	42.26	41.89	42.06	42.11	42.1	42.13	41.96	42	-0.00662088
	1	2	3	4	5	6	7	8	9	10	11	12										810.49	42.59	42.63	42.61	42.35	42.26	43.57	42.18	41.7	43.1	41.46	40.91	41.63	41.45	-0.0590659
A	28.8	28.84	41.69	39.5	40.86	39.04	43.76	40.93	45.55	42.13	45.09	39.64		28.8	28.84	0.23	-0.92					810.5	42.45	42.75	42.41	42.05	42.05	41.62	41.64	41.4	41.44	41.19	41.28	41.1	41.35	-0.0642582
B	29.17	28.7	44.61	41.81	41.33	39.57	42.5	39.92	41.3	38.47	38.83	34.28		29.17	28.7	0.44	-1.22					810.43	42.53	42.66	42.31	42.07	41.93	41.67	41.98	42.38	42.75	41.65	43.16	42.09	41.34	-0.0151099
C	29.37	29.2	44.7	41.89	42.4	39.24	38.89	37.1	43.92	41.19	43.22	39.37		29.37	29.2	0.49	-1.12					810.44	42.48	42.33	41.89	42.05	41.95	41.49	41.77	41.34	41.6	41.27	41.36	40.95	41.15	-0.055467
D	29.54	28.83	45.03	42.18	40.93	38.56	42.22	40.27	42.91	41	42.72	38.79		29.54	28.83	0.76	-0.96					810.45	41.96	41.78	41.96	41.87	41.89	41.53	41.68	41.06	41.16	41.15	41.11	41.03	40.97	-0.0471978
E	30.33	29.03	44.46	41.64	42.54	40.31	43.64	42.19	43.11	41.18	42.58	39.92		30.33	29.03	1.69	-0.94					810.53	39.28	38.95	39.03	38.88	38.95	38.93	39.04	38.91	39.05	38.95	39.07	39.04	39.08	-0.000549451
F	31.62	29.23	45.79	41.98	42.65	39.85	40.36	36.93	42.53	38.42	42.11	39.7		31.62	29.23	2.69	-0.86					810.54	39.36	39.1	39.15	39.22	39.27	39.21	39.57	39.51	39.67	39.87	39.9	39.87	40.11	0.0395604
G	34.07	29.35	44.55	41.77	43.9	41.2	44.81	42.15	44.3	40.87	41.39	39.48		34.07	29.35	4.57	-0.98					810.36	38.73	38.85	38.85	38.9	38.93	39.18	39.24	39.39	39.31	39.37	39.39	39.38	39.34	0.0298077
H	38.57	29.45	44.26	41.68	41.83	39.35	46.29	43.97	44.06	41.3	42.4	40.6		38.57	29.45	8.75	0.09					810.37	38.38	38.39	38.49	38.56	38.48	38.21	38.56	38.7	38.36	38.33	38.58	38.49	38.32	0.000164835
Measurement count: 16 Ex: 485 Em: 527 Scaling Factor : 1/1																						810.38	40.74	40.9	40.67	40.56	40.37	40.55	40.31	40.18	40.11	40.25	40.28	39.88	40.02	-0.0351648
	1	2	3	4	5	6	7	8	9	10	11	12										810.39	39.28	39.48	39.73	39.69	39.63	39.89	39.85	39.87	39.96	39.96	40.14	40.43	40.65	0.0441209
A	28.84	28.81	41.89	39.55	40.84	38.91	44.02	40.63	45.34	41.79	44.95	39.63		28.84	28.81	0.27	-0.95					810.4	41.83	41.7	41.46	41.25	41.29	42.51	41.2	41.28	40.73	41.01	40.78	40.67	40.98	-0.0440659
B	29.13	28.68	44.24	41.44	41.65	39.51	42.33	39.99	41.52	38.35	39.2	34.54		29.13	28.68	0.4	-1.24					810.14	39.75	39.51	39.57	39.37	39.55	39.23	39.35	39.1	39.24	39.08	39.19	39.04	39.08	-0.0261264
C	29.28	29.09	44.62	42.06	41.87	39.39	39.03	37.08	43.69	41.51	43.4	39.34		29.28	29.09	0.4	-1.23					810.15	41.16	41.28	40.86	41.13	40.89	40.86	40.93	40.63	40.72	40.64	40.68	40.71	40.75	-0.0221703
D	29.43	28.84	44.84	41.7	41.14	38.7	41.74	39.86	42.8	40.63	42.09	38.63		29.43	28.84	0.65	-0.95					810.32	40.14	40.17	39.98	40.1	39.8	40.33	39.92	39.99	39.71	40.06	39.98	40.07	39.91	-0.00692308
E	30.46	29.08	44.57	41.4	42.71	40.18	43.26	40.54	42.73	41.02	42.41	39.66		30.46	29.08	1.82	-0.89					810.33	36.93	36.9	36.94	36.97	37.12	36.91	37.1	37.08	37.18	37.24	37.33	37.36	37.49	0.0228571
F	31.72	29.13	45.66	42.38	42.55	39.87	40.5	36.78	42.23	37.81	41.61	40.02		31.72	29.13	2.79	-0.96					810.34	40.76	40.67	40.45	40.41	40.31	40.17	40.27	39.86	40.12	39.89	39.78	39.81	39.87	-0.0400275
G	34.29	29.45	44.35	41.34	43.69	41.28	44.65	41.94	44.2	40.66	42.17	39.34		34.29	29.45	4.79	-0.88					810.26	42.55	40.87	42.08	42	42.22	40.63	42.19	40.54	40.64	40.56	40.54	40.33	40.49	-0.0790934
H	39.26	29.68	44.14	41.06	42.63	39.1	46.19	42.05	43.85	41.28	42.37	40.5		39.26	29.68	9.44	0.32					810.27	36.03	36.07	36.34	36.4	36.67	36.54	36.93	36.78	37.17	37.4	37.69	37.54	37.9	0.0775
Measurement count: 17 Ex: 485 Em: 527 Scaling Factor : 1/1																						810.28	42.59	42.4	42.5	42.24	42.23	42.11	42.15	41.94	42.07	41.83	41.74	41.72	41.69	-0.0372527
	1	2	3	4	5	6	7	8	9	10	11	12										810.29	43.07	42.84	43.21	42.98	44.43	42.25	43.97	42.05	42.03	41.92	41.95	41.71	42.93	-0.0541484
A	28.97	28.87	42	39.88	40.9	39.05	44.03	40.72	45.64	42.27	45.27	40.19		28.97	28.87	0.4	-0.89					810.3	41.76	41.86	41.87	41.94	41.86	41.73	42.13	41.79	42.27	41.74	42.38	41.71	42.48	0.0161813
B	29.3	28.88	43.62	41.55	41.83	39.67	42.47	39.71	41.44	38.35	39.14	34.42		29.3	28.88	0.57	-1.04					810.5	38.63	38.54	38.75	38.57	38.56	38.57	38.47	38.35	38.35	38.12	38.22	38.11	38.15	-0.0251099
C	29.44	29.48	44.87	42.11	41.62	39.31	39.19	37.18	44.17	41.29	43.33	39.57		29.44	29.48	0.56	-0.84					810.6	41.06	41.05	41.01	41.04	41.14	40.89	41.19	41.51	41.29	41.25	41.76	41.62	41.3	0.0242857
D	30.31	28.86	44.85	43.1	40.87	38.36	42.07	40.12	42.77	40.87	42.34	38.73		30.31	28.86	1.53	-0.93					810.7	41.3	41.21	41.21	41.09	41.27	40.83	41	40.63	40.87	40.5	40.63	40.58	40.54	-0.0351648
E	30.65	29.12	44.43	41.44	42.83	40.11	43.31	40.64	42.88	41.15	42.59	39.75		30.65	29.12	2.01	-0.85					810.8	41.33	41.2	41.3	41.11	41.24	41.01	41.18	41.02	41.15	40.76	42.06	40.71	40.89	-0.00898352
F	32.08	29.18	45.96	42.75	43.14	39.96	40.96	37.17	42.18	38.15	41.87	40.17		32.08	29.18	3.15	-0.91					810.11	39.12	38.88	38.93	38.58	38.82	38.13	38.42	37.81	38.15	37.94	37.99	38.19	38.42	-0.0411813
G	34.89	29.59	44.01	41.6	43.88	40.73	44.89	42.07	44.3	40.64	41.44	39.26		34.89	29.59	5.39	-0.74					810.21	41.35	41.27	41.31	41.32	41.12	40.87	40.87	40.66	40.64	40.52	40.73	40.4	40.66	-0.0395055
H	39.86	30.2	44.08	41.16	41.79	39.24	46.23	42.03	44.02	41.07	42.15	40.6		39.86	30.2	10.04	0.84					810.22	41.22	41.29	41.27	41.34	41.36	41.24	41.3	41.28	41.07	41.97	41.25	40.93	41.12	-0.0031044
Measurement count: 18 Ex: 485 Em: 527 Scaling Factor : 1/1																						810.23	38.86	39.29	39.28	39.64	39.45	40.05	39.64	39.63	40.19	39.64	39.76	39.73	39.81	0.0298901
	1	2	3	4	5	6	7	8	9	10	11	12										810.24	34.09	34.19	34.18	34.19	34.23	34.22	34.28	34.54	34.42	34.77	34.64	34.72	34.81	0.0309066
A	28.98	28.9	42.11	39.87	40.65	38.95	43.98	40.64	45.63	41.74	44.02	39.64		28.98	28.9	0.41	-0.86					810.25	38.59	38.59	38.91	38.94	39.19	39.35	39.37	39.34	39.57	39.5	39.59	39.46	39.69	0.0442308
B	29.26	28.76	44.21	41.39	41.83	39.87	42.66	40.06	41.18	38.12	39.29	34.77		29.26	28.76	0.53	-1.16					810.16	39.61	39.11	39.4	38.93	39.6	38.75	38.79	38.63	38.73	38.55	38.64	38.47	38.6	-0.042033
C	29.51	29.25	44.52	42.1	42.03	39.37	39.14	37.24	43.48	41.25	43.21	39.5		29.51	29.25	0.63	-1.07					810.17	40.6	40.21	40.26	39.97	40.11	39.78	39.92	39.66	39.75	39.46	39.6	39.59	39.56	-0.0394231
D	29.61	28.87	44.42	41.46	40.99	38.33	41.9	39.89	42.65	40.5	42.19	38.55		29.61	28.87	0.83	-0.92					810.18	39.11	39.28	39.33	39.33	39.55	40.22	39.7	40.02	40.17	40.1	40.26	40.05	40.07	0.0458242
E	30.82	29.12	43.94	41.19	43.81	40.25	43.04	40.56	42.73	40.76	42.52	39.46		30.82	29.12	2.18	-0.85					810.19	40.2	40.05	40.04	39.85	39.9	39.48	39.48	39.34	39.26	39.21	39.07	38.99	39.02	-0.0538462
F	32.46	29.15	45.88	41.65	43.41	39.96	40.65	37.4	42.38	37.94	41.98	40.1		32.46	29.15	3.53	-0.94					810.2	40.42	40.77	40.6	40.58	40.69	41.26	40.6	40.5	40.6	40.53	40.57	40.74	40.43	-0.00357143
G	35.35	29.63	43.81	41.27	43.68	41.01	44.74	41.83	44.24	40.52	41.64	39.21		35.35	29.63	5.85	-0.7
H	40.39	30.04	43.83	41.15	41.56	39.08	46.09	41.92	44	41.97	42.35	40.53		40.39	30.04	10.57	0.68
Measurement count: 19 Ex: 485 Em: 527 Scaling Factor : 1/1
	1	2	3	4	5	6	7	8	9	10	11	12
A	29.09	29.02	42.28	40.18	40.85	39.07	43.34	40.68	45.84	42.38	45.21	39.76		29.09	29.02	0.52	-0.74
B	29.4	28.85	43.69	41.85	42.08	39.9	42.77	39.98	41.35	38.22	39.09	34.64		29.4	28.85	0.67	-1.07
C	29.6	29.27	44.38	42.13	41.67	39.39	39.38	37.33	44.28	41.76	44.49	39.59		29.6	29.27	0.72	-1.05
D	29.97	28.97	44.33	40.91	40.93	38.58	41.82	39.78	42.75	40.63	42.42	38.64		29.97	28.97	1.19	-0.82
E	31.06	29.23	44.04	41.28	44.01	40.28	43.16	40.54	42.89	42.06	42.83	39.6		31.06	29.23	2.42	-0.74
F	32.53	29.31	45.48	43.16	43.71	40.14	41.39	37.69	42.39	37.99	41.79	40.26		32.53	29.31	3.6	-0.78
G	36.02	29.9	43.46	41.36	43.66	40.78	45.01	41.74	44.34	40.73	41.33	39.07		36.02	29.9	6.52	-0.43
H	41.03	30.78	43.56	41.11	41.89	39.19	46.38	41.95	44.15	41.25	42.19	40.57		41.03	30.78	11.21	1.42
Measurement count: 20 Ex: 485 Em: 527 Scaling Factor : 1/1
	1	2	3	4	5	6	7	8	9	10	11	12
A	29.12	28.94	42.26	40.15	41.08	39.04	44.12	40.71	45.98	41.71	43.31	39.73		29.12	28.94	0.55	-0.82
B	29.4	28.82	44.13	41.2	42.23	39.87	42.78	40.07	41.21	38.11	39.38	34.72		29.4	28.82	0.67	-1.1
C	29.66	29.21	44.48	41.96	42.01	39.38	39.51	37.36	43.91	41.62	44.55	39.46		29.66	29.21	0.78	-1.11
D	29.87	28.95	44.08	41.63	40.97	38.49	41.68	39.81	42.61	40.58	42.15	38.47		29.87	28.95	1.09	-0.84
E	31.17	29.16	43.94	41.1	42.9	39.88	43.21	40.33	42.72	40.71	42.63	39.59		31.17	29.16	2.53	-0.81
F	32.94	29.37	45.41	42.09	43.53	40.43	41.58	37.54	42.38	38.19	41.84	40.05		32.94	29.37	4.01	-0.72
G	36.53	29.94	43.43	40.95	43.74	40.67	44.72	41.72	44.25	40.4	41.13	38.99		36.53	29.94	7.03	-0.39
H	41.38	30.93	43.23	41.03	41.82	39.04	46.24	41.71	44.06	40.93	42.12	40.74		41.38	30.93	11.56	1.57
Measurement count: 21 Ex: 485 Em: 527 Scaling Factor : 1/1
	1	2	3	4	5	6	7	8	9	10	11	12
A	29.23	29.07	42.6	40.53	41.18	39.08	44.03	40.75	46.33	42.48	43.64	39.81		29.23	29.07	0.66	-0.69
B	29.47	28.99	43.71	41.68	42.28	40.11	42.8	39.91	41.43	38.15	39.25	34.81		29.47	28.99	0.74	-0.93
C	29.78	29.43	44.46	42	43.06	39.34	39.67	37.49	44.67	41.3	43.43	39.69		29.78	29.43	0.9	-0.89
D	30.23	29.04	44.19	41.45	40.72	38.32	41.98	39.87	42.58	40.54	42.46	38.6		30.23	29.04	1.45	-0.75
E	31.36	29.44	45.35	41.35	42.87	40.02	43.35	40.49	42.83	40.89	42.78	39.56		31.36	29.44	2.72	-0.53
F	33.44	29.66	45.65	41.34	43.66	40.65	42.36	37.9	42.06	38.42	41.89	40.07		33.44	29.66	4.51	-0.43
G	37.51	30.01	43.61	41.15	43.52	40.98	45.23	41.69	44.35	40.66	41.03	39.02		37.51	30.01	8.01	-0.32
H	42.07	30.59	43.29	40.97	42.03	39.08	46.57	42.93	44.18	41.12	42.4	40.43		42.07	30.59	12.25	1.23

## Sheet: 809 Serum NTBI 
														Average -Def	Average +Def	Zeroed -Def	Zeroed +Def
Measurement count: 1 Ex: 485 Em: 527 Scaling Factor : 1/1																					C/C -Deferiprone																									810
	1	2	3	4	5	6	7	8	9	10	11	12									Time (min)	16	18	20	22	24	26	28	30	32	34	36	38	40	Slope Fxn	Fe (uM)	Slopes -Def	Slopes +Def	Difference	Mcalibr	Samples Slopes -Def	Samples Slopes +Def	LPI (uM)
A	27.48	29.59	43.8	42.68	45.44	44.52	43.49	43.31	45.32	44.35	45.46	43.56		27.48	29.59	0	0					-0.35	-0.21	-0.17	-0.06	0.1	0.12	0.27	0.31	0.45	0.44	0.63	0.6	0.72	0.0441209	0	0.0441209	0.0253297	0.0187912	0.0577671	0.0524176	0.0270604	0.438955		0.383313	WT ND
B	27.3	28.72	43.82	44.02	45.07	43.27	41.28	41.36	43.29	41.95	42.87	41.31		27.3	28.72	0	0					-0.01	0.06	0.25	0.25	0.41	0.51	0.61	0.62	0.81	0.74	0.92	0.9	1.05	0.0429121	0.078125	0.0429121	0.0347802	0.00813187		0.0623352	0.0514835	0.187852
C	27.78	28.73	44.38	42.66	44.36	42.99	43.33	42.06	43.41	40.78	43.19	41.86		27.78	28.73	0	0					-0.1	-0.1	0.13	0.08	0.24	0.24	0.38	0.4	0.62	0.5	0.73	0.7	0.89	0.0398901	0.15625	0.0398901	0.0353022			-0.0667308	-0.0442308	0
D	27.62	28.23	44.94	43.43	44.39	44.56	43.94	42.6	43.09	41.78	43.08	42.75		27.62	28.23	0	0					0.18	0.26	0.45	0.78	0.64	0.68	1.18	1.2	1.07	1.26	1.67	1.31	2.22	0.0692033	0.3125	0.0692033	0.0392857	0.0299176		0.0549451	-0.0195604	1.28976
E	27.57	28.15	44.62	43.32	45.07	44.51	44.12	43.06	44.13	42.7	42.91	40.55		27.57	28.15	0	0					0.5	0.6	0.73	0.91	1.07	1.23	1.39	1.52	1.77	1.8	2.08	2.15	2.53	0.0815659	0.625	0.0815659	0.0427198	0.0388462		-0.0938187	-0.0243132	0
F	27.91	27.81	44.17	43.3	44.25	42.01	43.55	42.85	44.07	42.58	42.73	40.74		27.91	27.81	0	0					0.64	0.87	1.09	1.29	1.42	1.68	1.96	2.14	2.53	2.75	3.11	3.28	3.73	0.125632	1.25	0.125632	0.0151099			-0.00291209	-0.0313462	0.492219		0.338228	WT ND Hep
G	28.06	28.08	43.68	42.24	42.41	41.21	43	42.24	41.56	40.57	43.01	41.8		28.06	28.08	0	0					1.34	1.64	2	2.41	2.85	3.16	3.72	4.13	4.76	5.14	5.72	6.16	6.98	0.231593	2.5	0.231593	0.0624451	0.169148		0.0243407	-0.0407967	1.12759
H	27.93	28.43	44.05	41.93	42.39	41.66	43.47	41.38	42.57	42.14	42.53	41.69		27.93	28.43	0	0					2.82	3.34	4.06	4.62	5.46	6.27	7.24	7.94	8.89	9.64	10.53	11.04	11.88	0.391016	5	0.391016	0.0965659	0.294451		-0.0111813	0.0226374	0
Measurement count: 2 Ex: 485 Em: 527 Scaling Factor : 1/1																																									0.0579396	0.0538187	0.0713361
	1	2	3	4	5	6	7	8	9	10	11	12																													-0.0107967	0.0456319	0
A	27.07	28.99	43.3	42.32	44.86	44.16	42.63	42.47	44.42	43.91	44.71	43.17		27.07	28.99	-0.41	-0.6																								0.0100824	-0.0147802	0.430394		0.458263	WT CID
B	26.77	28.39	43.13	42.12	44.23	42.57	41.81	40.81	42.58	41.12	42.11	40.55		26.77	28.39	-0.53	-0.33																								0.00557692	0.0126648	0
C	27.45	28.4	43.68	42.13	43.72	41.74	42.52	41.2	43.46	40.18	42.67	41.66		27.45	28.4	-0.33	-0.33																								0.0639835	0.00752747	0.977304
D	27.27	28.05	44.04	42.38	42.93	43.52	43.03	41.91	42.53	41.36	42.88	42.26		27.27	28.05	-0.35	-0.18																								0.101264	0.0676099	0.582578
E	27.12	27.81	45.12	42.37	43.66	43.38	43.26	41.95	43.59	42.25	42.87	40.17		27.12	27.81	-0.45	-0.34																								-0.0082967	-0.0256868	0.301038
F	27.33	27.71	43.52	42.56	43.37	41.29	42.63	41.74	43.31	42.16	42.66	40.52		27.33	27.71	-0.58	-0.1																								0.114451	0.0791484	0.611113		0.501826	WT CID Hep
G	27.78	27.78	43.21	41.84	42.82	41.22	42.05	41.22	41.31	40.22	42.39	41.59		27.78	27.78	-0.28	-0.3																								0.061511	0.0251923	0.628709
H	27.49	27.37	43.37	41.67	42	41.47	42.8	40.21	42.29	41.35	42.81	41.31		27.49	27.37	-0.44	-1.06																								0.026978	0.00164835	0.438479
Measurement count: 3 Ex: 485 Em: 527 Scaling Factor : 1/1																																									0.0147527	-0.0332418	0.830828
	1	2	3	4	5	6	7	8	9	10	11	12																													-0.0136813	0.00112637	0
A	26.48	27.66	41.43	40.61	42.97	42.34	42.28	41.25	43.13	42.18	42.9	41.21		26.48	27.66	-1	-1.93																								0.0147527	0.00260989	0.210204		0.453602	KO ND
B	26.16	27.1	41.3	40.41	43.85	41.8	41.65	41.28	42.89	41.53	41.43	39.96		26.16	27.1	-1.14	-1.62																								0.0259066	0.0534615	0
C	26.61	27.11	44.39	42.69	43.86	42.13	42.77	40.86	43.69	40.35	41.37	40.37		26.61	27.11	-1.17	-1.62																								0.107033	0.13478	0
D	26.63	26.84	41.98	40.48	40.88	41.17	41.43	39.95	42.65	41.73	43.01	42.48		26.63	26.84	-0.99	-1.39																								0.117363	0.0463462	1.22936
E	26.81	26.66	43.34	41.12	41.49	41.53	41.25	40.84	41.85	40.48	40.98	38.57		26.81	26.66	-0.76	-1.49																								0.0854945	0.0376374	0.82845
F	27.27	26.92	42.18	40.8	41.21	39.6	41.11	39.84	41.52	40.52	42.9	40.4		27.27	26.92	-0.64	-0.89																								-0.00337912	-0.00104396	0		0.149996	KO ND Hep
G	27.71	26.81	43.1	43.21	43.29	41.21	40.43	39.33	41.43	39.92	40.93	39.85		27.71	26.81	-0.35	-1.27																								0.000412088	0.00214286	0
H	27.96	26.37	41.87	39.91	40.21	39.95	41.05	38.37	40.45	39.74	44.17	41.39		27.96	26.37	0.03	-2.06																								-0.0168132	-0.0176099	0.0137916
Measurement count: 4 Ex: 485 Em: 527 Scaling Factor : 1/1																																									0.0418132	0.0395055	0.0399482
	1	2	3	4	5	6	7	8	9	10	11	12																													0.106538	0.0663187	0.69624
A	26.63	27.79	41.46	40.58	43.03	42.17	42.72	41.54	43.16	42.28	42.99	41.19		26.63	27.79	-0.85	-1.8																								-0.0159341	-0.0529396	0.640598		0.296092	KO IDD
B	26.34	27.17	41.34	41.12	44.38	42.34	41.24	40.88	42.57	41.23	41.74	41.1		26.34	27.17	-0.96	-1.55																								0.0812363	0.0424176	0.671986
C	26.66	27.23	43.38	42.45	43.63	42.9	42.81	41.08	42.39	39.89	41.65	40.39		26.66	27.23	-1.12	-1.5																								0.0404945	0.0470879	0
D	26.73	26.92	41.89	40.51	41	40.85	41.56	40.21	42.17	41.48	43.03	42.34		26.73	26.92	-0.89	-1.31																								0.0229396	0.0132418	0.167878
E	26.89	26.77	43.51	41.53	41.43	41.38	41.22	40.14	41.97	40.55	41.16	38.58		26.89	26.77	-0.68	-1.38																								0.0418407	0.0646703	0
F	27.4	26.61	42.18	40.7	41.25	39.7	41.27	39.86	41.64	40.31	42.84	40.73		27.4	26.61	-0.51	-1.2																								-0.0260714	-0.0366209	0.18262		0.0483183	KO IDD Hep
G	28.07	26.85	44.46	42.37	43.1	41.48	40.5	39.34	41.63	40.19	40.86	39.71		28.07	26.85	0.01	-1.23																								0.071511	0.0732692	0
H	28.35	27.24	41.73	39.83	39.97	39.76	41.07	38.35	40.43	39.93	43.18	41.92		28.35	27.24	0.42	-1.19																								-0.0518407	-0.0521978	0.00618246
Measurement count: 5 Ex: 485 Em: 527 Scaling Factor : 1/1																																									0.0101374	0.0389835	0
	1	2	3	4	5	6	7	8	9	10	11	12																													-0.0543956	-0.0574451	0.0527887
A	26.64	27.79	41.17	40.44	42.58	41.73	43.56	41.31	42.39	41.17	42.11	40.28		26.64	27.79	-0.84	-1.8																										0
B	26.51	27.25	40.91	40.26	44.03	41.93	41.47	41.07	43.7	41.5	41.82	40.3		26.51	27.25	-0.79	-1.47
C	26.96	27.19	44.22	42.3	43.66	42.21	42.86	41.09	42.79	40.29	41.89	39.55		26.96	27.19	-0.82	-1.54
D	27.01	26.87	41.58	40.08	41.33	40.46	41.18	39.44	42.47	41.71	43.3	42.64		27.01	26.87	-0.61	-1.36
E	27.2	26.84	43.95	41.11	40.81	40.58	42.51	39.68	41.25	39.67	40.44	38.6		27.2	26.84	-0.37	-1.31				C/C +Deferiprone
F	27.49	26.72	42.13	40.23	40.55	39.12	40.53	39.33	40.74	39.7	42.85	40.88		27.49	26.72	-0.42	-1.09				Time (min)	16	18	20	22	24	26	28	30	32	34	36	38	40	Slope Fxn	Fe (uM)
G	28.22	26.9	43.81	42.57	43.39	42.01	39.97	39.83	42.08	40.41	40.13	39.23		28.22	26.9	0.16	-1.18					-1.34	-1.32	-1.16	-1.16	-1.05	-1.08	-0.91	-0.94	-0.82	-0.88	-0.77	-0.82	-0.72	0.0253297	0
H	28.7	26.6	41.66	39.56	40.05	39.71	41.27	38.03	40	39.63	43.51	41.93		28.7	26.6	0.77	-1.83					-1.07	-1.09	-0.88	-0.91	-0.79	-0.78	-0.6	-0.6	-0.46	-0.46	-0.37	-0.4	-0.24	0.0347802	0.078125
Measurement count: 6 Ex: 485 Em: 527 Scaling Factor : 1/1																						-0.98	-0.94	-0.76	-0.78	-0.57	-0.63	-0.4	-0.46	-0.33	-0.35	-0.19	-0.27	-0.1	0.0353022	0.15625
	1	2	3	4	5	6	7	8	9	10	11	12										-0.76	-0.75	-0.54	-0.5	-0.3	-0.28	-0.11	-0.21	0.02	-0.09	0.13	0.01	0.22	0.0392857	0.3125
A	26.8	27.93	41.1	40.24	42.39	41.65	43.5	41.83	42.32	41.15	42.02	40.07		26.8	27.93	-0.68	-1.66					-0.85	-0.81	-0.58	-0.59	-0.41	-0.38	-0.16	-0.26	-0.05	-0.06	0.03	0.03	0.23	0.0427198	0.625
B	26.77	27.23	40.87	40.11	43.74	42.44	41.44	41.1	43.4	41.52	42.3	40.74		26.77	27.23	-0.53	-1.49					-0.36	-0.59	-0.18	-0.93	-0.83	-0.88	-0.57	-0.5	-0.5	-0.65	-0.45	-0.43	0.29	0.0151099	1.25
C	27.11	27.22	45.95	42.43	43.64	41.89	42.4	41.15	42.54	40	41	39.38		27.11	27.22	-0.67	-1.51					-0.61	-0.53	-0.28	-0.24	-0.02	-0.01	0.23	0.26	0.58	0.52	0.7	0.67	0.9	0.0624451	2.5
D	27.05	26.94	41.57	41.1	41.15	40.36	41.46	39.83	42.61	41.57	43.31	42.32		27.05	26.94	-0.57	-1.29					-1.05	-1	-0.76	-0.35	-0.27	-0.05	0.03	0.12	0.48	0.61	0.94	0.88	1.35	0.0965659	5
E	27.31	26.91	43.99	41.82	40.77	40.45	41.33	39.58	41.05	39.65	41.6	38.11		27.31	26.91	-0.26	-1.24
F	27.87	26.86	43.2	40.43	40.31	39.15	41.88	39.2	40.69	39.71	42.9	40.84		27.87	26.86	-0.04	-0.95
G	28.47	26.95	44.24	42.74	43.7	41.98	40.05	38.59	41.89	40.52	39.94	38.95		28.47	26.95	0.41	-1.13
H	29.09	26.84	41.41	39.35	39.97	39.37	40.7	38.95	40.11	39.08	43.41	42.15		29.09	26.84	1.16	-1.59
Measurement count: 7 Ex: 485 Em: 527 Scaling Factor : 1/1
	1	2	3	4	5	6	7	8	9	10	11	12
A	26.89	27.94	40.87	40.13	42.17	41.37	43.71	41.99	41.77	40.53	41.47	39.55		26.89	27.94	-0.59	-1.65
B	26.99	27.43	40.9	40.06	44.09	42.27	41.54	41.21	43.6	41.78	42.38	40.85		26.99	27.43	-0.31	-1.29
C	27.36	27.43	45.99	42.67	43.68	41.94	42.48	41.23	42.9	40.28	41.43	39.11		27.36	27.43	-0.42	-1.3
D	27.36	27.18	41.35	40.95	41.48	40.23	41.76	39.4	42.94	41.77	43.45	42.51		27.36	27.18	-0.26	-1.05
E	27.62	27.02	44.21	41.92	40.5	39.97	41.95	39.5	40.64	39.3	41.13	37.7		27.62	27.02	0.05	-1.13
F	28.11	27.04	43.71	40.85	40.24	38.91	42.07	39.1	40.52	39.33	42.98	40.92		28.11	27.04	0.2	-0.77
G	28.8	27.14	44.4	43.01	43.96	42.3	40.07	38.47	42.12	40.73	39.79	38.74		28.8	27.14	0.74	-0.94
H	29.56	27	41.68	39.36	39.93	39.42	40.69	38.7	40.24	39.33	43.52	42.27		29.56	27	1.63	-1.43
Measurement count: 8 Ex: 485 Em: 527 Scaling Factor : 1/1
	1	2	3	4	5	6	7	8	9	10	11	12
A	27.03	28.07	40.79	39.8	42.21	41.31	44.02	41.93	41.79	40.46	41.6	39.68		27.03	28.07	-0.45	-1.52
B	27.14	27.45	40.87	39.89	44.27	42.18	41.84	41.26	43.8	41.84	42.5	40.9		27.14	27.45	-0.16	-1.27
C	27.52	27.51	45.7	42.56	43.69	42.05	42.53	41.03	42.88	40.25	41.76	39.07		27.52	27.51	-0.26	-1.22
D	27.57	27.27	41.21	40.73	41.68	40.33	41.89	39.68	42.97	41.79	43.46	42.43		27.57	27.27	-0.05	-0.96
E	27.86	27.09	44.11	42.07	40.53	39.87	41.94	39.39	40.68	39.04	41.37	37.59		27.86	27.09	0.29	-1.06
F	28.35	27.18	43.95	40.91	40.32	38.9	41.2	38.84	40.79	39.39	43.13	40.86		28.35	27.18	0.44	-0.63
G	29.32	27.12	44.09	43.06	43.92	42.26	40.26	38.35	42.06	40.67	39.79	38.36		29.32	27.12	1.26	-0.96
H	30.01	27.11	41.93	39.45	39.7	39.36	40.7	38.53	40.65	39.56	43.74	42.22		30.01	27.11	2.08	-1.32
Measurement count: 9 Ex: 485 Em: 527 Scaling Factor : 1/1
	1	2	3	4	5	6	7	8	9	10	11	12
A	27.13	28.25	40.73	39.79	42.49	41.46	43.54	41.96	41.56	40.02	41.67	40.39		27.13	28.25	-0.35	-1.34
B	27.29	27.65	40.8	39.62	44.31	42.27	41.74	41.25	43.76	41.82	42.58	41.06		27.29	27.65	-0.01	-1.07
C	27.68	27.75	45.03	42.9	43.85	42.16	42.69	41.41	42.98	40.53	42.2	39.11		27.68	27.75	-0.1	-0.98
D	27.8	27.47	41.23	39.98	41.9	40.67	42	39.51	43	42	43.41	42.7		27.8	27.47	0.18	-0.76
E	28.07	27.3	45.23	42.34	40.66	39.57	42.45	40.45	40.78	39.05	40.23	37.31		28.07	27.3	0.5	-0.85
F	28.55	27.45	44.12	41.49	40.57	38.74	41.6	38.76	40.84	39.1	42.78	41.28		28.55	27.45	0.64	-0.36
G	29.4	27.47	44.67	43.17	44.18	42.46	40.38	38.49	42.05	40.79	41.17	38.41		29.4	27.47	1.34	-0.61
H	30.75	27.38	42.99	40.11	40.82	39.64	41.04	37.53	41.3	40.33	43.72	42.21		30.75	27.38	2.82	-1.05
Measurement count: 10 Ex: 485 Em: 527 Scaling Factor : 1/1
	1	2	3	4	5	6	7	8	9	10	11	12										Samples - Deferiprone
A	27.27	28.27	40.62	39.41	42.65	41.42	44.14	41.89	41.82	39.85	41.8	39.8		27.27	28.27	-0.21	-1.32					Time (min) ->	16	18	20	22	24	26	28	30	32	34	36	38	40	Slope Fxn
B	27.36	27.63	40.8	39.51	44.46	42.24	41.68	41.05	43.63	41.88	42.45	40.92		27.36	27.63	0.06	-1.09					810.46	40.73	40.62	40.68	40.77	41.11	41.03	41.22	41.17	41.36	41.28	41.57	41.79	41.98	0.0524176
C	27.68	27.79	44.94	42.46	43.54	41.93	42.57	42.11	43.22	40.12	42.11	39		27.68	27.79	-0.1	-0.94					810.47	40.8	40.8	41.23	41.19	41.56	41.63	41.97	41.92	42.1	42.14	42.23	42.05	42.17	0.0623352
D	27.88	27.48	41.18	39.85	41.83	40.77	41.77	39.68	43.8	41.97	43.25	42.63		27.88	27.48	0.26	-0.75					810.48	45.03	44.94	44.96	44.58	44.39	44.26	44.46	44.08	43.96	43.88	43.72	43.61	43.44	-0.0667308
E	28.17	27.34	45.65	42.22	40.75	39.55	42.36	40.65	40.6	38.92	40.73	37.12		28.17	27.34	0.6	-0.81					810.49	41.23	41.18	41.32	41.31	41.43	41.33	41.77	41.57	41.95	41.92	42.26	42.21	42.56	0.0549451
F	28.78	27.22	43.94	42.74	40.86	38.48	41.69	38.51	40.96	38.92	42.8	41.01		28.78	27.22	0.87	-0.59					810.5	45.23	45.65	45.96	44.55	44.32	44.17	44.21	43.68	43.8	43.46	43.61	43.28	43.88	-0.0938187
G	29.7	27.55	44.35	43.01	44.07	42.41	40.55	38.57	41.81	40.5	40.67	38.12		29.7	27.55	1.64	-0.53					810.43	44.12	43.94	44.32	44.54	44.71	44.48	44.66	44.43	44.46	44.23	44.44	44.18	43.91	-0.00291209
H	31.27	27.43	43.24	40.26	39.84	39.76	41.24	37.62	41.45	40.34	43.54	42.03		31.27	27.43	3.34	-1					810.44	44.67	44.35	44.52	47.91	47.93	47.68	46.19	45.82	47.11	45.67	45.98	45.09	46.26	0.0243407
Measurement count: 11 Ex: 485 Em: 527 Scaling Factor : 1/1																						810.45	42.99	43.24	43.91	43.57	43.75	43.76	43.97	43.65	43.88	43.44	43.49	42.99	42.84	-0.0111813
	1	2	3	4	5	6	7	8	9	10	11	12										810.53	42.49	42.65	42.85	42.85	43.08	43.13	43.06	43.24	43.69	43.57	43.87	43.77	43.81	0.0579396
A	27.31	28.43	40.68	39.43	42.85	41.77	44.57	42.1	42.27	39.95	42.03	40.19		27.31	28.43	-0.17	-1.16					810.54	44.31	44.46	44.6	44.13	44.31	44.21	44.53	44.24	44.32	44.08	44.12	44.15	44.25	-0.0107967
B	27.55	27.84	41.23	39.69	44.6	42.34	41.6	41.07	43.48	41.75	42.67	41.16		27.55	27.84	0.25	-0.88					810.36	43.85	43.54	43.93	43.57	44.91	43.73	44.53	43.57	44.63	43.6	44.43	43.64	44.15	0.0100824
C	27.91	27.97	44.96	42.89	43.93	42.17	42.45	41.98	43.06	40.3	42.43	39.29		27.91	27.97	0.13	-0.76					810.37	41.9	41.83	42.18	41.87	42.23	42.14	42.31	42.11	42.3	41.99	42.12	42.01	42.05	0.00557692
D	28.07	27.69	41.32	39.87	42.18	40.93	41.92	40.02	43.13	41.95	43.45	42.73		28.07	27.69	0.45	-0.54					810.38	40.66	40.75	41.12	41.17	41.71	41.61	41.79	41.84	41.96	42.03	42.12	42.17	42.14	0.0639835
E	28.3	27.57	45.96	42.31	41.12	39.76	42.53	40.76	41.06	39.1	41.13	37.29		28.3	27.57	0.73	-0.58					810.39	40.57	40.86	41.3	41.33	41.87	41.95	42.6	42.57	42.74	42.81	43	42.86	42.78	0.101264
F	29	27.63	44.32	42.13	41.3	38.82	42.09	38.97	41.28	38.83	43.01	41.13		29	27.63	1.09	-0.18					810.4	44.18	44.07	44.31	44	44.11	44.07	44.39	43.96	44.36	44.03	44.22	43.55	44.09	-0.0082967
G	30.06	27.8	44.52	42.86	44.31	42.47	40.91	38.87	41.95	40.67	40.85	38.08		30.06	27.8	2	-0.28					810.14	40.82	39.84	41.36	40.06	40.72	40.94	41.64	41.58	42.31	42.57	42.78	42.51	42.7	0.114451
H	31.99	27.67	43.91	40.98	41.36	40	41.6	37.59	41.84	41.01	43.65	42.34		31.99	27.67	4.06	-0.76					810.15	43.54	44.14	44.57	44.86	44.16	44.8	45.05	45.17	45.14	45.01	45.52	45.01	45.45	0.061511
Measurement count: 12 Ex: 485 Em: 527 Scaling Factor : 1/1																						810.32	41.74	41.68	41.6	41.6	41.88	41.79	41.83	41.85	42.12	41.74	42.28	42.02	42.48	0.026978
	1	2	3	4	5	6	7	8	9	10	11	12										810.33	42.69	42.57	42.45	42.43	42.81	42.66	42.99	42.79	43.24	42.37	43.38	42.45	42.93	0.0147527
A	27.42	28.43	40.77	39.3	42.85	41.69	44.86	42.03	42.18	39.97	42	40.88		27.42	28.43	-0.06	-1.16					810.34	42	41.77	41.92	41.89	41.9	41.74	41.95	41.58	41.97	41.54	41.93	41.46	41.6	-0.0136813
B	27.55	27.81	41.19	39.4	44.13	42.16	41.6	40.94	43.59	41.69	42.7	41.03		27.55	27.81	0.25	-0.91					810.26	42.45	42.36	42.53	42.49	42.71	42.63	42.61	42.78	42.63	42.88	42.71	42.83	42.64	0.0147527
C	27.86	27.95	44.58	42.71	43.57	41.86	42.43	41.9	43.14	40.25	42.34	39.54		27.86	27.95	0.08	-0.78					810.27	41.6	41.69	42.09	41.97	42.29	42.16	42.4	42.37	42.42	42.15	42.29	42.23	42.42	0.0259066
D	28.4	27.73	41.31	39.64	41.87	40.99	41.89	40.05	42.81	41.68	43.2	42.42		28.4	27.73	0.78	-0.5					810.28	40.38	40.55	40.91	41.12	41.55	41.7	42.03	42.07	42.43	42.19	42.62	42.81	42.96	0.107033
E	28.48	27.56	44.55	41.98	41.17	39.77	42.49	40.11	41.21	39.17	41.11	37.38		28.48	27.56	0.91	-0.59					810.29	41.04	41.24	41.6	41.67	41.92	42.12	42.49	42.48	42.94	42.74	43.58	43.67	43.88	0.117363
F	29.2	26.88	44.54	42.12	41.33	38.94	41.97	39.06	42.53	39.13	42.82	40.86		29.2	26.88	1.29	-0.93					810.3	41.56	41.82	42.27	42.18	42.5	42.59	42.94	42.99	43.17	43.34	43.56	43.46	43.65	0.0854945
G	30.47	27.84	47.91	42.8	44	42.22	41.12	40.13	42.12	40.66	40.29	37.9		30.47	27.84	2.41	-0.24					810.5	43.76	43.63	43.48	43.59	43.46	43.46	43.63	43.38	43.57	43.48	43.52	43.39	43.76	-0.00337912
H	32.55	28.08	43.57	41.18	40.06	40.42	41.67	37.5	41.92	40.95	43.69	42.2		32.55	28.08	4.62	-0.35					810.6	42.98	43.22	43.06	43.14	43.12	42.97	43.02	43.04	43.07	42.9	43.02	43.12	43.24	0.000412088
Measurement count: 13 Ex: 485 Em: 527 Scaling Factor : 1/1																						810.7	43	43.8	43.13	42.81	42.97	42.72	42.78	42.93	42.94	42.61	42.86	42.87	43.01	-0.0168132
	1	2	3	4	5	6	7	8	9	10	11	12										810.8	40.78	40.6	41.06	41.21	41.49	41.53	41.89	41.68	41.92	41.74	41.75	41.78	41.44	0.0418132
A	27.58	28.54	41.11	39.46	43.08	41.97	44.16	42.24	42.5	40.49	42.29	41.09		27.58	28.54	0.1	-1.05					810.11	40.84	40.96	41.28	42.53	42.65	42.34	42.56	42.51	42.91	43.02	43.17	43.4	43.65	0.106538
B	27.71	27.93	41.56	39.73	44.31	43.38	41.88	41.05	43.46	41.93	43.7	41.3		27.71	27.93	0.41	-0.79					810.21	42.05	41.81	41.95	42.12	41.87	42.07	42.11	41.9	42.01	41.64	41.69	41.58	41.67	-0.0159341
C	28.02	28.16	44.39	42.58	44.91	42.44	42.81	41.33	43.12	40.51	42.91	39.87		28.02	28.16	0.24	-0.57					810.22	41.3	41.45	41.84	41.92	42.1	42.03	42.6	42.59	42.9	42.97	43.15	43.07	43.12	0.0812363
D	28.26	27.93	41.43	39.67	42.23	41.07	41.9	40.21	42.97	41.74	43.26	42.62		28.26	27.93	0.64	-0.3					810.23	41.67	41.8	42.03	42	42.29	42.31	42.52	42.45	42.68	42.56	42.68	42.52	42.66	0.0404945
E	28.64	27.74	44.32	41.98	41.71	39.76	42.71	40.07	41.49	39.52	41.31	37.83		28.64	27.74	1.07	-0.41					810.24	42.58	42.45	42.67	42.7	43.7	42.86	43.06	42.87	43.06	42.92	43.15	43.03	43.27	0.0229396
F	29.33	26.98	44.71	42	41.87	39.35	42.29	39.44	42.65	39.16	43.05	40.81		29.33	26.98	1.42	-0.83					810.25	42.2	42.11	42.43	42.34	42.91	42.52	42.67	42.78	43.14	43.03	43.14	42.89	43.15	0.0418407
G	30.91	28.06	47.93	42.63	44.11	42.31	41.55	39.3	41.87	40.77	40.7	38.26		30.91	28.06	2.85	-0.02					810.16	43.41	43.25	43.45	43.2	43.26	43.25	43.43	43.07	43.18	42.97	43.08	42.61	42.78	-0.0260714
H	33.39	28.16	43.75	41.59	40.72	40.68	41.92	37.79	42.1	41.23	43.78	42.43		33.39	28.16	5.46	-0.27					810.17	40.23	40.73	41.13	41.11	41.31	41.49	41.82	41.79	41.98	41.93	42.02	42.04	42.2	0.071511
Measurement count: 14 Ex: 485 Em: 527 Scaling Factor : 1/1																						810.18	42.78	42.8	43.01	42.82	43.05	42.64	42.71	42.41	42.33	42.28	41.98	41.78	41.72	-0.0518407
	1	2	3	4	5	6	7	8	9	10	11	12										810.19	41.17	40.67	40.85	40.29	40.7	40.54	41.02	40.83	40.93	40.71	41	41.03	41.05	0.0101374
A	27.6	28.51	41.03	39.35	43.13	41.94	44.8	42.2	42.59	40.35	42.31	41.02		27.6	28.51	0.12	-1.08					810.2	43.72	43.54	43.65	43.69	43.78	43.6	43.74	43.43	43.61	43.01	43.04	42.33	42.26	-0.0543956
B	27.81	27.94	41.63	39.69	44.21	42.35	41.79	41.1	43.46	41.77	42.86	41.09		27.81	27.94	0.51	-0.78
C	28.02	28.1	44.26	42.46	43.73	41.92	42.66	41.26	42.97	40.28	42.52	39.82		28.02	28.1	0.24	-0.63
D	28.3	27.95	41.33	39.57	42.14	40.97	41.74	40.21	42.72	41.73	43.25	42.58		28.3	27.95	0.68	-0.28
E	28.8	27.77	44.17	42.06	41.61	39.75	42.63	40.07	41.53	39.43	41.49	37.77		28.8	27.77	1.23	-0.38					Samples + Deferiprone
F	29.59	26.93	44.48	41.84	41.95	39.34	42.16	39.37	42.34	39.2	42.64	40.71		29.59	26.93	1.68	-0.88					Time (min) ->	16	18	20	22	24	26	28	30	32	34	36	38	40	Slope Fxn
G	31.22	28.07	47.68	42.65	44.07	42.2	41.7	40.46	42.07	40.75	40.54	38.36		31.22	28.07	3.16	-0.01					810.46	39.79	39.41	39.43	39.3	39.46	39.35	39.63	39.66	39.84	39.83	40.02	39.92	40.17	0.0270604
H	34.2	28.38	43.76	41.68	40.94	40.67	42.12	37.92	42.03	41.15	43.6	42.56		34.2	28.38	6.27	-0.05					810.47	39.62	39.51	39.69	39.4	39.73	39.69	40.4	40.21	40.54	40.3	40.46	40.45	40.64	0.0514835
Measurement count: 15 Ex: 485 Em: 527 Scaling Factor : 1/1																						810.48	42.9	42.46	42.89	42.71	42.58	42.46	42.4	42.26	42.19	42.06	42.02	41.83	41.81	-0.0442308
	1	2	3	4	5	6	7	8	9	10	11	12										810.49	39.98	39.85	39.87	39.64	39.67	39.57	39.53	39.34	39.59	39.33	39.58	39.45	39.54	-0.0195604
A	27.75	28.68	41.22	39.63	43.06	42.45	45.05	42.59	42.94	40.65	42.52	40.45		27.75	28.68	0.27	-0.91					810.5	42.34	42.22	42.31	41.98	41.98	42.06	41.83	41.65	41.93	41.67	42	41.55	41.87	-0.0243132
B	27.91	28.12	41.97	40.4	44.53	42.42	41.83	41.09	43.63	41.88	43.06	41.2		27.91	28.12	0.61	-0.6					810.43	41.49	42.74	42.13	42.12	42	41.84	41.94	41.7	41.95	41.56	41.85	41.39	41.22	-0.0313462
C	28.16	28.33	44.46	42.4	44.53	42.58	42.99	41.61	43.02	40.4	42.67	40.25		28.16	28.33	0.38	-0.4					810.44	43.17	43.01	42.86	42.8	42.63	42.65	42.43	42.43	42.79	42.02	42.51	42.04	42.11	-0.0407967
D	28.8	28.12	41.77	39.53	42.31	41.11	41.95	40.29	42.78	41.8	43.43	42.65		28.8	28.12	1.18	-0.11					810.45	40.11	40.26	40.98	41.18	41.59	41.68	41.73	41.53	41.58	41.31	41.14	40.86	40.84	0.0226374
E	28.96	27.99	44.21	41.83	41.79	40.02	42.61	40	41.89	39.83	41.82	38.13		28.96	27.99	1.39	-0.16					810.53	41.46	41.42	41.77	41.69	41.97	41.94	42.45	42.32	42.58	42.5	42.62	42.4	42.67	0.0538187
F	29.87	27.24	44.66	41.94	42.6	39.65	42.4	39.65	42.56	39.62	42.71	40.86		29.87	27.24	1.96	-0.57					810.54	42.27	42.24	42.34	42.16	43.38	42.35	42.42	43.11	43.37	43.13	43.12	43.08	43.21	0.0456319
G	31.78	28.31	46.19	42.43	44.39	42.42	42.03	40.95	42.11	40.87	41.02	38.59		31.78	28.31	3.72	0.23					810.36	42.16	41.93	42.17	41.86	42.44	41.92	42.58	41.56	42.47	41.54	42.32	41.49	41.74	-0.0147802
H	35.17	28.46	43.97	41.73	41.64	41.07	42.49	38.04	42.6	41.48	43.74	42.6		35.17	28.46	7.24	0.03					810.37	40.67	40.77	40.93	40.99	41.07	40.97	41.11	41.12	40.97	41.04	40.97	41.04	41.17	0.0126648
Measurement count: 16 Ex: 485 Em: 527 Scaling Factor : 1/1																						810.38	39.57	39.55	39.76	39.77	39.76	39.75	40.02	39.66	39.96	40.04	39.93	39.99	39.36	0.00752747
	1	2	3	4	5	6	7	8	9	10	11	12										810.39	38.74	38.48	38.82	38.94	39.35	39.34	39.65	39.71	39.89	39.83	39.9	40.01	40.16	0.0676099
A	27.79	28.65	41.17	39.66	43.24	42.32	45.17	42.29	42.99	40.58	42.45	41.01		27.79	28.65	0.31	-0.94					810.4	42.46	42.41	42.47	42.22	42.31	42.2	42.42	42.17	42.23	42.09	42.17	41.64	41.84	-0.0256868
B	27.92	28.12	41.92	40.21	44.24	43.11	41.85	41.01	43.38	41.67	42.87	40.98		27.92	28.12	0.62	-0.6					810.14	39.64	39.76	40	40.42	40.68	40.67	41.07	40.97	41.29	41.22	41.46	41.23	41.59	0.0791484
C	28.18	28.27	44.08	42.26	43.57	41.56	42.79	41.08	43.04	40.14	42.78	40.02		28.18	28.27	0.4	-0.46					810.15	41.96	41.89	42.1	42.03	42.24	42.2	42.59	42.29	42.49	42.11	42.56	42.29	42.71	0.0251923
D	28.82	28.02	41.57	39.34	42.11	41.12	41.58	39.89	42.93	41.57	43.07	42.38		28.82	28.02	1.2	-0.21					810.32	41.25	41.05	41.07	40.94	41.05	41.1	41.09	41.01	41.26	40.79	41.21	41.01	41.31	0.00164835
E	29.09	27.89	43.68	41.65	41.84	39.66	42.78	40.37	41.68	39.71	41.79	38.18		29.09	27.89	1.52	-0.26					810.33	41.41	42.11	41.98	41.9	41.33	41.26	41.61	41.08	41.55	40.73	41.48	40.8	41.36	-0.0332418
F	30.05	27.31	44.43	41.7	42.57	39.71	42.37	39.63	42.51	39.65	42.41	40.69		30.05	27.31	2.14	-0.5					810.34	39.51	39.68	40.02	40.05	40.21	40.21	40.29	39.89	39.85	40.01	39.82	40.07	39.58	0.00112637
G	32.19	28.34	45.82	42.43	43.96	42.17	42.07	40.91	41.9	40.47	40.83	38.57		32.19	28.34	4.13	0.26					810.26	40.45	40.65	40.76	40.11	40.07	40.07	40	40.37	39.98	40.22	40.24	40.35	41.13	0.00260989
H	35.87	28.55	43.65	41.53	41.58	40.97	42.48	38.08	42.59	41.23	43.43	42.29		35.87	28.55	7.94	0.12					810.27	38.76	38.51	38.97	39.06	39.44	39.37	39.65	39.63	39.96	39.7	40.06	39.77	39.69	0.0534615
Measurement count: 17 Ex: 485 Em: 527 Scaling Factor : 1/1																						810.28	38.49	38.57	38.87	40.13	39.3	40.46	40.95	40.91	41.28	41.26	41.55	41.21	41.38	0.13478
	1	2	3	4	5	6	7	8	9	10	11	12										810.29	37.53	37.62	37.59	37.5	37.79	37.92	38.04	38.08	38.5	38.29	38.31	38.26	38.67	0.0463462
A	27.93	28.77	41.36	39.84	43.69	42.58	45.14	42.49	43.17	40.69	42.68	41.15		27.93	28.77	0.45	-0.82					810.3	40.02	39.85	39.95	39.97	40.49	40.35	40.65	40.58	40.69	40.57	40.76	40.58	40.75	0.0376374
B	28.11	28.26	42.1	40.54	44.32	43.37	42.12	41.26	43.57	41.86	43.06	41.29		28.11	28.26	0.81	-0.46					810.5	41.82	41.88	41.75	41.69	41.93	41.77	41.88	41.67	41.86	41.78	41.75	41.69	41.91	-0.00104396
C	28.4	28.4	43.96	42.19	44.63	42.47	43.24	41.55	43.07	40.44	43.14	40.46		28.4	28.4	0.62	-0.33					810.6	40.53	40.12	40.3	40.25	40.51	40.28	40.4	40.14	40.44	40.22	40.5	40.25	40.48	0.00214286
D	28.69	28.25	41.95	39.59	42.3	40.97	41.97	39.85	42.94	41.78	43.18	42.47		28.69	28.25	1.07	0.02					810.7	42	41.97	41.95	41.68	41.74	41.73	41.8	41.57	41.78	41.56	41.79	41.48	41.52	-0.0176099
E	29.34	28.1	43.8	41.93	41.96	39.96	42.63	39.98	41.92	39.83	41.98	38.61		29.34	28.1	1.77	-0.05					810.8	39.05	38.92	39.1	39.17	39.52	39.43	39.83	39.71	39.83	39.73	40.02	39.8	39.67	0.0395055
F	30.44	27.31	44.46	41.95	42.74	39.89	42.42	39.96	42.91	40.27	42.33	40.72		30.44	27.31	2.53	-0.5					810.11	39.1	38.92	38.83	39.13	39.16	39.2	39.62	39.65	40.27	39.91	40.4	40.05	40.3	0.0663187
G	32.82	28.66	47.11	42.79	44.36	42.23	42.43	41.28	42.01	40.43	40.93	38.88		32.82	28.66	4.76	0.58					810.21	40.79	40.5	40.67	40.66	40.77	40.75	40.87	40.47	40.43	39.91	39.72	39.5	39.58	-0.0529396
H	36.82	28.91	43.88	41.58	42.31	41.29	42.94	38.5	42.9	41.5	43.61	42.43		36.82	28.91	8.89	0.48					810.22	40.33	40.34	41.01	40.95	41.23	41.15	41.48	41.23	41.5	41.35	41.53	41.34	41.42	0.0424176
Measurement count: 18 Ex: 485 Em: 527 Scaling Factor : 1/1																						810.23	40.39	39.8	40.19	40.88	41.09	41.02	40.45	41.01	41.15	41.18	41.21	41.13	41.29	0.0470879
	1	2	3	4	5	6	7	8	9	10	11	12										810.24	41.06	40.92	41.16	41.03	41.3	41.09	41.2	40.98	41.29	41.04	41.45	41.18	41.47	0.0132418
A	27.92	28.71	41.28	39.83	43.57	42.5	45.01	42.11	43.34	40.57	42.56	41.18		27.92	28.71	0.44	-0.88					810.25	39.11	39	39.29	39.54	39.87	39.82	40.25	40.02	40.46	40.32	40.4	40.36	40.54	0.0646703
B	28.04	28.26	42.14	40.3	44.08	43.13	41.74	40.79	43.48	41.78	42.92	41.04		28.04	28.26	0.74	-0.46					810.16	42.7	42.63	42.73	42.42	42.62	42.58	42.65	42.38	42.47	42.06	42.25	41.84	41.72	-0.0366209
C	28.28	28.38	43.88	42.06	43.6	41.54	42.37	40.73	42.9	40.22	43.03	40.32		28.28	28.38	0.5	-0.35					810.17	37.31	37.12	37.29	37.38	37.83	37.77	38.13	38.18	38.61	38.36	38.64	38.52	38.87	0.0732692
D	28.88	28.14	41.92	39.33	41.99	41.04	41.54	40.01	42.61	41.56	42.97	42.06		28.88	28.14	1.26	-0.09					810.18	41.28	41.01	41.13	40.86	40.81	40.71	40.86	40.69	40.72	40.42	40.25	39.91	39.87	-0.0521978
E	29.37	28.09	43.46	41.67	42.03	40.04	42.88	40.22	41.74	39.73	41.93	38.36		29.37	28.09	1.8	-0.06					810.19	38.41	38.12	38.08	37.9	38.26	38.36	38.59	38.57	38.88	38.65	38.86	38.73	39.13	0.0389835
F	30.66	27.16	44.23	41.56	42.81	39.83	42.15	39.7	43.02	39.91	42.28	40.42		30.66	27.16	2.75	-0.65					810.2	42.21	42.03	42.34	42.2	42.43	42.56	42.6	42.29	42.43	41.82	41.34	40.73	40.71	-0.0574451
G	33.2	28.6	45.67	42.02	44.03	42.09	42.19	41.26	41.64	39.91	40.71	38.65		33.2	28.6	5.14	0.52
H	37.57	29.04	43.44	41.31	42.57	41.22	42.74	38.29	42.97	41.35	43.01	41.82		37.57	29.04	9.64	0.61
Measurement count: 19 Ex: 485 Em: 527 Scaling Factor : 1/1
	1	2	3	4	5	6	7	8	9	10	11	12
A	28.11	28.82	41.57	40.02	43.87	42.62	45.52	42.56	43.56	40.76	42.68	41.21		28.11	28.82	0.63	-0.77
B	28.22	28.35	42.23	40.46	44.12	43.12	42.28	41.21	43.52	41.75	43.15	41.45		28.22	28.35	0.92	-0.37
C	28.51	28.54	43.72	42.02	44.43	42.32	43.38	41.48	43.02	40.5	43.14	40.4		28.51	28.54	0.73	-0.19
D	29.29	28.36	42.26	39.58	42.12	40.97	41.93	39.82	42.86	41.79	43.08	42.25		29.29	28.36	1.67	0.13
E	29.65	28.18	43.61	42	42.12	39.93	42.71	40.24	41.75	40.02	42.02	38.64		29.65	28.18	2.08	0.03
F	31.02	27.36	44.44	41.85	43	39.9	42.29	40.06	43.17	40.4	41.98	40.25		31.02	27.36	3.11	-0.45
G	33.78	28.78	45.98	42.51	44.22	42.17	42.62	41.55	41.69	39.72	41	38.86		33.78	28.78	5.72	0.7
H	38.46	29.37	43.49	41.14	42.78	41.46	43.58	38.31	43.15	41.53	43.04	41.34		38.46	29.37	10.53	0.94
Measurement count: 20 Ex: 485 Em: 527 Scaling Factor : 1/1
	1	2	3	4	5	6	7	8	9	10	11	12
A	28.08	28.77	41.79	39.92	43.77	42.4	45.01	42.29	43.46	40.58	42.52	41.13		28.08	28.77	0.6	-0.82
B	28.2	28.32	42.05	40.45	44.15	43.08	42.02	41.01	43.39	41.69	43.03	41.18		28.2	28.32	0.9	-0.4
C	28.48	28.46	43.61	41.83	43.64	41.49	42.45	40.8	43.12	40.25	42.89	40.36		28.48	28.46	0.7	-0.27
D	28.93	28.24	42.21	39.45	42.01	41.04	41.46	40.07	42.87	41.48	42.61	41.84		28.93	28.24	1.31	0.01
E	29.72	28.18	43.28	41.55	42.17	39.99	42.83	40.35	41.78	39.8	42.04	38.52		29.72	28.18	2.15	0.03
F	31.19	27.38	44.18	41.39	42.86	40.01	42.23	39.77	43.4	40.05	41.78	39.91		31.19	27.38	3.28	-0.43
G	34.22	28.75	45.09	42.04	43.55	41.64	42.81	41.21	41.58	39.5	41.03	38.73		34.22	28.75	6.16	0.67
H	38.97	29.31	42.99	40.86	42.51	41.23	43.67	38.26	43.07	41.34	42.33	40.73		38.97	29.31	11.04	0.88
Measurement count: 21 Ex: 485 Em: 527 Scaling Factor : 1/1
	1	2	3	4	5	6	7	8	9	10	11	12
A	28.2	28.87	41.98	40.17	43.81	42.67	45.45	42.71	43.65	40.75	42.66	41.29		28.2	28.87	0.72	-0.72
B	28.35	28.48	42.17	40.64	44.25	43.21	42.48	41.31	43.76	41.91	43.27	41.47		28.35	28.48	1.05	-0.24
C	28.67	28.63	43.44	41.81	44.15	41.74	42.93	41.36	43.24	40.48	43.15	40.54		28.67	28.63	0.89	-0.1
D	29.84	28.45	42.56	39.54	42.05	41.17	41.6	39.58	43.01	41.52	42.78	41.72		29.84	28.45	2.22	0.22
E	30.1	28.38	43.88	41.87	42.14	39.36	42.64	41.13	41.44	39.67	42.2	38.87		30.1	28.38	2.53	0.23
F	31.64	28.1	43.91	41.22	42.78	40.16	42.42	39.69	43.65	40.3	41.72	39.87		31.64	28.1	3.73	0.29
G	35.04	28.98	46.26	42.11	44.09	41.84	42.96	41.38	41.67	39.58	41.05	39.13		35.04	28.98	6.98	0.9
H	39.81	29.78	42.84	40.84	42.7	41.59	43.88	38.67	43.12	41.42	42.26	40.71		39.81	29.78	11.88	1.35
