# Supplementary material for: A crosstalk between hepcidin and IRE/IRP pathways controls ferroportin expression and determines serum iron levels in mice
Source: eLife. 2022 Sep 6;11:e81332. doi: 10.7554/eLife.81332 (PMC9499557; doi:10.7554/eLife.81332)
Supplement: Figure 2—source data 3. [file elife-81332-fig2-data3.xlsx]

## Sheet: Serum Fe Ratios
808
Ct	36	40	40	35	44	30	30	36						53	63	49	51	48	43								58	60	54	61	57	57	54		56	58	56			58	60	59	51	60	61	55	47*	69
LPS	14	14	19.5	13	18	15								51	46	35	39	28*	35								55	56	41	48	52	40								52	54	54	52.8	10*	14*	9*	33	29	34
Avg1	36.375													51.1667													57.1													59.125
Avg2	15.5833													41.2													48.6667													46.68
Ratio1	0.428408													0.805212													0.852306													0.789514
[truncated: 3 more columns]
