# Supplementary material for: A crosstalk between hepcidin and IRE/IRP pathways controls ferroportin expression and determines serum iron levels in mice
Source: eLife. 2022 Sep 6;11:e81332. doi: 10.7554/eLife.81332 (PMC9499557; doi:10.7554/eLife.81332)
Supplement: Figure 2—source data 4. [file elife-81332-fig2-data4.xls]

## Sheet: Sheet1
0.071	0.068	0.331	0.213	0.772	0.125	0.18	0.109	0.143	0.69	0.317	0.74		OD 450nm	ID	Hepc	Treatment	Adjusted for 5%				OD	ID
0.089	0.084	0.248	0.211	0.684	0.149	0.126	0.099	0.107	0.523	0.343	0.724		0.149	808 24	23.4446	WT ND LPS	468.891				0.353	807 1
0.114	0.109	0.256	0.24	0.149	0.165	0.13	0.116	0.119	0.643	0.401	0.713		0.155	808 25	22.0521	WT ND LPS	441.041				0.874	807 10
0.193	0.187	0.522	0.204	0.155	0.142	0.135	0.596	0.108	0.167	0.548	0.106		0.125	808 31	50	WT ND LPS	1000				0.273	807 2
0.368	0.358	0.775	0.82	0.097	0.152	0.1	0.725	0.131	0.172	0.629	0.175		0.167	808 68	19.9569	WT ND LPS	399.138				0.74	807 21
0.637	0.6	0.397	0.764	1.172	0.166	0.109	0.538	0.119	0.238	0.758	0.113		0.172	808 69	19.2575	WT ND LPS	385.15				0.317	807 3
0.933	0.888	0.648	0.649	0.071	0.147	0.112	0.585	0.118	0.353	0.535	0.137		0.353	807 1	9.46532	WT ND CT	189.306				0.724	807 34
1.283	1.182	0.284	0.572	0.098	0.144	0.109	0.134	0.108	0.273	0.874	1.249		0.273	807 2	12.1416	WT ND CT	242.831				0.713	807 35
													0.317	807 3	10.5294	WT ND CT	210.589				0.343	807 4
						1000	0.071	0.068	0.0695				0.343	807 4	9.74302	WT ND CT	194.86				0.401	807 5
						333.3	0.089	0.084	0.0865				0.331	808 1	10.0936	WT ND CT	201.872				0.106	807 58
						111.1	0.114	0.109	0.1115				0.248	808 2	13.288	WT ND CT	265.759				0.175	807 59
													0.256	808 3	12.8975	WT ND CT	257.95				0.548	807 6
													0.238	808 70	13.8135	WT ND CT	276.27				0.113	807 60
													0.097	808 26	234	WT CID 5w LPS	4680				0.137	807 61
													1.172	808 27	0.0315192	WT CID 5w LPS	0.630383				0.629	807 7
						Y=Bottom + (Top-Bottom)/(1+10^((LogEC50-X)*HillSlope))							0.071	808 28	950	WT CID 5w LPS	19000				0.758	807 8
													0.098	808 30	222	WT CID 5w LPS	4440				0.535	807 9
						Bottom	0.1252						0.108	808 63	140	WT CID 5w LPS	2800				0.331	808 1
						Top	4437						0.119	808 61	60	WT CID 5w	1200				0.284	808 10
						LogIC50	-51.62						0.118	808 62	80	WT CID 5w	1600				0.213	808 11
						Hill slope	-0.07022						0.106	807 58	160	WT CID 5w	3200				0.211	808 12
													0.175	807 59	18.8729	WT CID 5w	377.458				0.24	808 13
						Tends to 0.1252							0.113	807 60	100	WT CID 5w	2000				0.204	808 14
													0.137	807 61	27.794	WT CID 5w	555.88				0.82	808 15
													0.1	808 44	200	WT CID 1w LPS	4000				0.764	808 16
													0.109	808 45	130	WT CID 1w LPS	2600				0.649	808 17
													0.112	808 46	110	WT CID 1w LPS	2200				0.572	808 18
													0.109	808 47	130	WT CID 1w LPS	2600				0.772	808 19
													0.109	808 48	130	WT CID 1w LPS	2600				0.248	808 2
													0.099	808 49	212	WT CID 1w LPS	4240				0.684	808 20
													0.144	808 39	24.9058	WT CID 1w	498.116				0.149	808 24
													0.18	808 40	18.2807	WT CID 1w	365.615				0.155	808 25
													0.126	808 41	44.7261	WT CID 1w	894.523				0.097	808 26
													0.13	808 42	33.3869	WT CID 1w	667.738				1.172	808 27
													0.135	808 43	28.9468	WT CID 1w	578.935				0.071	808 28
													0.116	808 50	90	WT CID 1d LPS	1800				0.256	808 3
													0.134	808 55	29.6152	WT CID 1d LPS	592.305				0.098	808 30
													0.143	808 56	25.2446	WT CID 1d LPS	504.891				0.125	808 31
													0.107	808 57	150	WT CID 1d LPS	3000				0.149	808 33
													0.119	808 58	60	WT CID 1d LPS	1200				0.165	808 34
													0.108	808 59	140	WT CID 1d LPS	2800				0.142	808 35
													0.131	808 60	32.2078	WT CID 1d LPS	644.156				0.152	808 36
													0.149	808 33	23.4446	WT CID 1d	468.891				0.166	808 37
													0.165	808 34	20.2604	WT CID 1d	405.208				0.147	808 38
													0.142	808 35	25.603	WT CID 1d	512.059				0.144	808 39
													0.152	808 36	22.7092	WT CID 1d	454.184				0.522	808 4
													0.166	808 37	20.1068	WT CID 1d	402.136				0.18	808 40
													0.147	808 38	23.9884	WT CID 1d	479.767				0.126	808 41
													0.284	808 10	11.6975	KO ND LPS	233.949				0.13	808 42
													0.213	808 11	15.3637	KO ND LPS	307.275				0.135	808 43
													0.211	808 12	15.5063	KO ND LPS	310.126				0.1	808 44
													0.24	808 13	13.7048	KO ND LPS	274.095				0.109	808 45
								Data within curve interpolated using Prism Graphpad					0.204	808 14	16.0329	KO ND LPS	320.659				0.112	808 46
													0.874	807 10	2.10403	KO ND CT	42.0807				0.109	808 47
													0.401	807 5	8.28251	KO ND CT	165.65				0.109	808 48
													0.548	807 6	5.63975	KO ND CT	112.795				0.099	808 49
													0.629	807 7	4.55549	KO ND CT	91.1097				0.116	808 50
													0.758	807 8	3.14525	KO ND CT	62.905				0.596	808 51
													0.535	807 9	5.83293	KO ND CT	116.659				0.725	808 52
													0.522	808 4	6.03235	KO ND CT	120.647				0.538	808 53
													0.775	808 6	2.98126	KO ND CT	59.6252				0.585	808 54
													0.397	808 7	8.37288	KO ND CT	167.458				0.134	808 55
													0.648	808 8	4.32649	KO ND CT	86.5297				0.143	808 56
													0.649	808 17	4.31467	KO IDD 5w LPS	86.2933				0.107	808 57
													0.572	808 18	5.29821	KO IDD 5w LPS	105.964				0.119	808 58
													0.772	808 19	3.00988	KO IDD 5w LPS	60.1977				0.108	808 59
													0.684	808 20	3.91455	KO IDD 5w LPS	78.291				0.775	808 6
													0.596	808 51	4.97456	KO IDD 5w LPS	99.4911				0.131	808 60
													0.725	808 52	3.47656	KO IDD 5w LPS	69.5312				0.119	808 61
													0.538	808 53	5.78781	KO IDD 5w LPS	115.756				0.118	808 62
													0.585	808 54	5.1208	KO IDD 5w LPS	102.416				0.108	808 63
													0.523	808 66	6.01678	KO IDD 5w LPS	120.336				0.69	808 65
													0.643	808 67	4.38593	KO IDD 5w LPS	87.7187				0.523	808 66
													0.74	807 21	3.32376	KO IDD 5w CT	66.4752				0.643	808 67
													0.724	807 34	3.48688	KO IDD 5w CT	69.7376				0.167	808 68
													0.713	807 35	3.60157	KO IDD 5w CT	72.0315				0.172	808 69
													0.82	808 15	2.56705	KO IDD 5w CT	51.341				0.397	808 7
													0.764	808 16	3.08687	KO IDD 5w CT	61.7375				0.238	808 70
													0.69	808 65	3.84849	KO IDD 5w CT	76.9697				0.648	808 8
