# Supplementary material for: A crosstalk between hepcidin and IRE/IRP pathways controls ferroportin expression and determines serum iron levels in mice
Source: eLife. 2022 Sep 6;11:e81332. doi: 10.7554/eLife.81332 (PMC9499557; doi:10.7554/eLife.81332)
Supplement: Figure 2—source data 5. [file elife-81332-fig2-data5.xlsx]

## Sheet: 807 808
Sample #	Tissue Weight (mg)	Vol. Acid (ul)	OD 562nm Zeroed	Fe (ug/50uL) using adjusted Std Curve	weight of tissue assayed (g/50uL)	Fe (ug/g) liver	Genotype		Original Data	0.043	0.042	0.366	3.581	1.669	3.507	0.401	0.76	0.149	0.43	2.895	0.441
71 807	11	550	0.2015	0.122686	0.001	122.686	KO IDD 11W			0.101	0.098	0.332	3.552	2.201	3.426	0.383	0.703	0.269	2.655	3.253	0.673
69 807	10.9	545	0.2565	0.159043	0.001	159.043	KO IDD 11W			0.14	0.134	0.484	3.529	2.378	3.546	0.35	0.792	0.314	2.896	3.315	0.558
70 807	6.9	345	0.2685	0.166975	0.001	166.975	KO IDD 11W			0.279	0.274	3.526	3.538	1.094	0.441	1.403	0.783	0.501	2.851	3.284	0.299
68 807	20.9	1045	0.5155	0.330249	0.001	330.249	KO IDD 11W			0.486	0.487	3.18	3.537	0.431	0.371	0.771	0.759	0.327	0.192	0.348	0.311
67 807	6.5	325	0.6305	0.406267	0.001	406.267	KO IDD 11W			0.903	0.944	3.509	3.477	0.208	0.36	0.687	0.982	0.404	1.804	0.12	0.244
64	2.8	140	0.1495	0.0883131	0.001	88.3131	KO IDD 5W			2.161	2.161	3.445	1.871	3.329	0.465	0.866	0.401	0.438	3.387	0.437	3.582
16	4.9	245	1.0825	0.70505	0.001	705.05	KO IDD 5W			3.427	3.483	3.589	1.125	3.444	0.195	0.746	0.235	0.426	0.532	0.358	3.38
65	5.4	270	1.7615	1.15389	0.001	1153.89	KO IDD 5W
15	8.3	415	1.8285	1.19818	0.001	1198.18	KO IDD 5W			0.0425		Zeroed Table:											Curve
21 807			0.8535	0.56008	0.001				0	0		0.3235	3.5385	1.6265	3.4645	0.3585	0.7175	0.1065	0.3875	2.8525	0.3985
52	3.5	175	0.1065	0.0598889	0.001	59.8889	KO IDD 5W LPS		10	0.057		0.2895	3.5095	2.1585	3.3835	0.3405	0.6605	0.2265	2.6125	3.2105	0.6305
51	5.9	295	0.1925	0.116737	0.001	116.737	KO IDD 5W LPS		20	0.0945		0.4415	3.4865	2.3355	3.5035	0.3075	0.7495	0.2715	2.8535	3.2725	0.5155
53	5.5	275	0.2265	0.139212	0.001	139.212	KO IDD 5W LPS		50	0.234		3.4835	3.4955	1.0515	0.3985	1.3605	0.7405	0.4585	2.8085	3.2415	0.2565
54	3.8	190	0.2715	0.168958	0.001	168.958	KO IDD 5W LPS		100	0.444		3.1375	3.4945	0.3885	0.3285	0.7285	0.7165	0.2845	0.1495	0.3055	0.2685
67	8.8	440	0.4895	0.313062	0.001	313.062	KO IDD 5W LPS		200	0.881		3.4665	3.4345	0.1655	0.3175	0.6445	0.9395	0.3615	1.7615	0.0775	0.2015
20	9.5	475	1.0515	0.684558	0.001	684.558	KO IDD 5W LPS		500	2.1185		3.4025	1.8285	3.2865	0.4225	0.8235	0.3585	0.3955	3.3445	0.3945	3.5395
17	9.3	465	1.6265	1.06465	0.001	1064.65	KO IDD 5W LPS		1000	3.4125		3.5465	1.0825	3.4015	0.1525	0.7035	0.1925	0.3835	0.4895	0.3155	3.3375
18	5.3	265	0.4155	0.267202	0.001	1336.01	KO IDD 5W LPS
19	5.3	265	0.4515	0.291274	0.001	1456.37	KO IDD 5W LPS		Concentration ferric chloride (uM)	Concentration Ferric Chloride (mg/dL)	Concentration Ferric Chloride (ug/dL)	Concentration Ferric Chloride (ug/50 uL)	Ladder
66	4.4	220	0.8515	0.558743	0.001	2793.71	KO IDD 5W LPS		0	0	0	0	0
7	3.4	170	1.1055	0.728586	0.001	3642.93	KO ND 5W		10	0.05585	55.85	0.027925	0.057
5	4.8	240	1.1065	0.729254	0.001	3646.27	KO ND 5W		20	0.1117	111.7	0.05585	0.0945
8	6.8	340	1.2935	0.854296	0.001	4271.48	KO ND 5W		50	0.27925	279.25	0.139625	0.234
6	3.7	185	1.3145	0.868338	0.001	4341.69	KO ND 5W		100	0.5585	558.5	0.27925	0.444
4	5.1	255	1.3205	0.87235	0.001	4361.75	KO ND 5W		200	1.117	1117	0.5585	0.881
5 807			1.7055	1.12979	0.001				500	2.7925	2792.5	1.39625	2.1185
11	9.4	470	1.0245	0.674423	0.001	3372.12	KO ND 5W LPS		1000	5.585	5585	2.7925	3.4125
9	6.6	330	1.5315	1.01344	0.001	5067.2	KO ND 5W LPS
12	8.3	415	1.5725	1.04086	0.001	5204.28	KO ND 5W LPS
14	6.9	345	1.5755	1.04286	0.001	5214.31	KO ND 5W LPS
10	12.4	620	1.6265	1.07696	0.001	5384.82	KO ND 5W LPS
13	5.8	290	1.7075	1.13113	0.001	5655.63	KO ND 5W LPS
35	3.5	175	0.1525	0.0902961	0.001	90.2961	WT CID 1D
38	5.8	290	0.3075	0.192755	0.001	192.755	WT CID 1D
33	5.8	290	0.3175	0.199365	0.001	199.365	WT CID 1D
37	10.2	510	0.3405	0.214569	0.001	214.569	WT CID 1D
36	7	350	0.3585	0.226467	0.001	226.467	WT CID 1D
34	8.7	435	0.4225	0.268773	0.001	268.773	WT CID 1D
56	3.1	155	0.2845	0.177552	0.001	177.552	WT CID 1D LPS		FOR DILUTED SAMPLES:
50	4	200	0.3585	0.226467	0.001	226.467	WT CID 1D LPS		0.066	0.063	1.385	1.637	0.828	0.729
57	3.6	180	0.3615	0.228451	0.001	228.451	WT CID 1D LPS		0.121	0.119	1.171	1.772	1	0.814
59	8.1	405	0.3835	0.242993	0.001	242.993	WT CID 1D LPS		0.155	0.157	1.379	1.64	0.926	1.77
60	6.4	320	0.3875	0.245637	0.001	245.637	WT CID 1D LPS		0.29	0.294	1.17	0.48	0.687	0.918
58	4.2	210	0.3955	0.250925	0.001	250.925	WT CID 1D LPS		0.507	0.503	1.358	0.516	0.672
55	6.3	315	0.4585	0.29257	0.001	292.57	WT CID 1D LPS		0.901	0.988	1.596	0.902	0.916
41	6.1	305	0.6445	0.415521	0.001	415.521	WT CID 1W		2.159	2.152	1.691	1.054	0.665
43	4.6	230	0.7035	0.454521	0.001	454.521	WT CID 1W		3.365	3.432	1.089	0.801	0.854
40	8.5	425	0.7285	0.471047	0.001	471.047	WT CID 1W
42	6.1	305	0.8235	0.533845	0.001	533.845	WT CID 1W
39	8.1	405	1.3605	0.888815	0.001	888.815	WT CID 1W		0.0645		1.3205	1.5725	0.7635	0.6645
45	4.4	220	0.6605	0.426097	0.001	426.097	WT CID 1W LPS		0.0555		1.1065	1.7075	0.9355	0.7495
48	5.3	265	0.7165	0.463115	0.001	463.115	WT CID 1W LPS		0.0915		1.3145	1.5755	0.8615	1.7055
44	3.3	165	0.7175	0.463776	0.001	463.776	WT CID 1W LPS		0.2275		1.1055	0.4155	0.6225	0.8535
47	7.5	375	0.7405	0.478979	0.001	478.979	WT CID 1W LPS		0.4405		1.2935	0.4515	0.6075
46	6.8	340	0.7495	0.484929	0.001	484.929	WT CID 1W LPS		0.88		1.5315	0.8375	0.8515
49	5.7	285	0.9395	0.610524	0.001	610.524	WT CID 1W LPS		2.091		1.6265	0.9895	0.6005
58 807	20	1000	0.6005	0.390906	0.001	1954.53	WT CID 5W		3.334		1.0245	0.7365	0.7895
62	5.9	295	0.6225	0.405617	0.001	2028.08	WT CID 5W
60 807	13.7	685	0.6645	0.433701	0.001	2168.51	WT CID 5W
61 807	11.9	595	0.7495	0.490538	0.001	2452.69	WT CID 5W		Concentration ferric chloride (uM)	Concentration Ferric Chloride (mg/dL)	Concentration Ferric Chloride (ug/dL)	Concentration Ferric Chloride (ug/50 uL)	Ladder
59 807	7.3	365	0.7895	0.517285	0.001	2586.43	WT CID 5W		0	0	0	0	0
61	4	200	0.8615	0.56543	0.001	2827.15	WT CID 5W		10	0.05585	55.85	0.027925	0.0555
63	5.8	290	0.6075	0.395587	0.001	1977.93	WT CID 5W LPS		20	0.1117	111.7	0.05585	0.0915
28	4.1	205	0.7365	0.481846	0.001	2409.23	WT CID 5W LPS		50	0.27925	279.25	0.139625	0.2275
29	9.6	480	0.7635	0.4999	0.001	2499.5	WT CID 5W LPS		100	0.5585	558.5	0.27925	0.4405
26	7.3	365	0.8375	0.549381	0.001	2746.91	WT CID 5W LPS		200	1.117	1117	0.5585	0.88
30	5.8	290	0.9355	0.614911	0.001	3074.56	WT CID 5W LPS		500	2.7925	2792.5	1.39625	2.091
27	6	300	0.9895	0.65102	0.001	3255.1	WT CID 5W LPS		1000	5.585	5585	2.7925	3.334
2	10	500	0.2895	0.180857	0.001	180.857	WT ND 5W
1	7	350	0.3235	0.203332	0.001	203.332	WT ND 5W
3	8.7	435	0.4415	0.281333	0.001	281.333	WT ND 5W
25	4	200	0.1655	0.0988895	0.001	98.8895	WT ND 5W LPS
32	8	400	0.3285	0.206637	0.001	206.637	WT ND 5W LPS
24	12.4	620	0.3885	0.246298	0.001	246.298	WT ND 5W LPS
31	7.5	375	0.3985	0.252909	0.001	252.909	WT ND 5W LPS
63 807	3.4	170	0.0775	0.0407192	0.001	40.7192	WT ND 9W
62 807	19.9	995	0.3055	0.191433	0.001	191.433	WT ND 9W
65 807	11.8	590	0.3155	0.198043	0.001	198.043	WT ND 9W
64 807	18.8	940	0.3945	0.250264	0.001	250.264	WT ND 9W
66 807	18.1	905	0.3985	0.252909	0.001	252.909	WT ND 9W

## Sheet: 807
0.042	0.052	1.014	0.847	0.27	0.394	2.999	3.593	2.289	0.338	0.191	0.034		0.068	1.788	0.337	1.3	0.302	1.815
0.09	0.092	0.805	1.001	0.374	0.345	1.957	3.57	1.363	0.34	0.786	0.048		0.096	1.59	0.713	1.228	0.514	0.319
0.134	0.132	0.6	0.792	3.574	0.388	3.471	3.516	2.181	0.312	3.558	0.035		0.134	1.775	0.489	1.374	0.292	0.079
0.271	0.272	0.559	0.726	3.517	0.301	1.154	3.466	1.34	0.33	3.53	0.036		0.271	1.772	0.941	1.475	0.48	2.156
0.478	0.486	0.625	0.759	3.463	0.397	2.393	3.436	0.626	0.422	3.533	0.046		0.484	1.587	0.284	1.434	0.316	1.691
0.902	0.929	0.476	1.024	3.524	3.475	3.463	3.45	1.162	0.191	3.499	0.034		0.899	1.564	0.525	1.054	0.159	1.93
2.146	2.141	0.851	0.342	3.608	3.151	3.495	3.512	3.477	1.403	3.435	0.034		2.133	1.154	1.072	1.285	0.285	1.955
3.371	3.388	0.572	0.334	3.532	1.426	3.457	1.347	3.403	0.199	0.033	0.034		3.473	0.712	1.598	1.502	1.441	1.72
191118													201118
uM	ugr Fe/L	ugr Fe/50ul	OD1	OD2	mean OD					uM	ugr Fe/L	ugr Fe/50ul
0	0	0	0.042	0.052	0.047					0	0	0	0.068
10	558.5	0.027925	0.09	0.092	0.091					10	558.5	0.027925	0.096
20	1117	0.05585	0.134	0.132	0.133					20	1117	0.05585	0.134
50	2792.5	0.139625	0.271	0.272	0.2715					50	2792.5	0.139625	0.271
100	5585	0.27925	0.478	0.486	0.482					100	5585	0.27925	0.484
200	11170	0.5585	0.902	0.929	0.9155					200	11170	0.5585	0.899
500	27925	1.39625	2.146	2.141	2.1435	y=1.5019x+0.0561				500	27925	1.39625	2.133	y=1.4861x+0.0619
1000	55850	2.7925	3.371	3.388	3.3795					1000	55850	2.7925	3.473
E.17	OD	ugFe/mg	ugFe/g	E.17	ID	ugFe/g
1	1.014	0.637792	637.792	wt	1	637.792
2	0.805	0.498635	498.635	PHZ	2	498.635
3	0.6	0.362141	362.141		7	529.263
4	0.559	0.334843	334.843		9	526.6
5	0.625	0.378787	378.787		10	629.136
6	0.476	0.279579	279.579		11	489.979
7	0.851	0.529263	529.263		14	644.45
8	0.572	0.343498	343.498	KO	3	362.141
9	0.847	0.5266	526.6	PHZ	4	334.843
10	1.001	0.629136	629.136		5	378.787
11	0.792	0.489979	489.979		6	279.579
12	0.726	0.446035	446.035		8	343.498
13	0.759	0.468007	468.007		12	446.035
14	1.024	0.64445	644.45		13	468.007
807	50ul	10ul	ugFe/mg	ugFe/g	807
1	0.342		0.190359	190.359	1	WT ND
2	0.334		0.185032	185.032	2	WT ND
3	0.27		0.14242	142.42	3	WT ND
4	0.374		0.211665	211.665	4	WT ND
5	3.574	1.788	5.7657	5765.7	5	KO ND
6	3.517	1.59	5.10653	5106.53	6	KO ND
7	3.463	1.775	5.72242	5722.42	7	KO ND
8	3.524	1.772	5.71243	5712.43	8	KO ND
9	3.608	1.587	5.09654	5096.54	9	KO ND
10	3.532	1.564	5.01997	5019.97	10	KO ND
11	0.394		0.224982	224.982	11
12	0.345		0.192356	192.356	12
13	0.388		0.220987	220.987	13
14	0.301		0.16306	163.06	14
15	0.397		0.226979	226.979	15
16	3.475	1.154	3.65504	3655.04	16
17	3.151	0.712	2.18357	2183.57	17
18	1.426	0.337	0.935149	935.149	18
19	2.999	0.713	2.1869	2186.9	19
20	1.957	0.489	1.44117	1441.17	20
21	3.471	0.941	2.94594	2945.94	21	KO IDD
22	1.154	0.284	0.758706	758.706	22	KO IDD
23	2.393	0.525	1.56102	1561.02	23	KO IDD
24	3.463	1.072	3.38205	3382.05	24
25	3.495	1.598	5.13316	5133.16	25
26	3.457	1.3	4.14109	4141.09	26
27	3.593	1.228	3.90139	3901.39	27
28	3.57	1.374	4.38744	4387.44	28
29	3.516	1.475	4.72368	4723.68	29
30	3.466	1.434	4.58719	4587.19	30
31	3.436	1.054	3.32213	3322.13	31
32	3.45	1.285	4.09115	4091.15	32
33	3.512	1.502	4.81357	4813.57	33
34	1.347	0.302	0.81863	818.63	34	KO IDD
35	2.289	0.514	1.5244	1524.4	35	KO IDD
36	1.363	0.292	0.785339	785.339	36
37	2.181	0.48	1.41121	1411.21	37
38	1.34	0.316	0.865237	865.237	38
39	0.626	0.159	0.342566	342.566	39
40	1.162	0.285	0.762035	762.035	40
41	3.477	1.441	4.61049	4610.49	41
42	3.403	1.815	5.85558	5855.58	42
43	0.338		0.187696	187.696	43
44	0.34		0.189027	189.027	44
45	0.312		0.170384	170.384	45
46	0.33		0.182369	182.369	46
47	0.422		0.243625	243.625	47
48	0.191		0.0898196	89.8196	48
49	1.403	0.319	0.875225	875.225	49
50	0.199	0.079	0.0951461	95.1461	50
51	0.191		0.0898196	89.8196	51
52	0.786		0.485984	485.984	52
53	3.558	2.156	6.99081	6990.81	53
54	3.53	1.691	5.44277	5442.77	54
55	3.533	1.93	6.23843	6238.43	55
56	3.499	1.955	6.32166	6321.66	56
57	3.435	1.72	5.53932	5539.32	57
