# Supplementary material for: A crosstalk between hepcidin and IRE/IRP pathways controls ferroportin expression and determines serum iron levels in mice
Source: eLife. 2022 Sep 6;11:e81332. doi: 10.7554/eLife.81332 (PMC9499557; doi:10.7554/eLife.81332)
Supplement: Figure 2—source data 6. [file elife-81332-fig2-data6.xlsx]

## Sheet: 809 Serum
808 Serum		5 weeks of diet
LPS Injection 1mg/g
	Fe	mean	st				saturation	mean	st				ID
WT ND PBS	36	36.375	4.89716				51	54.5	5.97614
	40						56
	40						52
	35						54
	44						67
	30						49
	30						49
	36						58
WT ND LPS	14	15.5833	2.57714				23	24.6667	3.14113
	14						23
	19.5						28
	13						21
	18						29
	15						24
WT CID PBS	53	51.1667	6.70572				85	88.8333	3.3116
	63						86
	49						91
	51						89
	48						94
	43						88
WT CID LPS	51	41.2	7.0852				74	70.2	8.92749
	46						84
	35						67
	39						63
	35						63
HJV ND PBS	58	57.1	2.28279				84	87.1	5.13052
	60						86
	54						89
	61						87
	57						80
	57						79
	54						87
	56						93
	58						94
	56						92
HJV ND LPS	55	48.6667	6.91857				71	74.6667	11.1833
	56						90
	41						62
	48						81
	52						81
	40						63
HJV IDD PBS	58	59.125	5.16686				88	86.25	9.40744
	60
	59						69
	51						75
	60						90
	61						91
	55						87
							94
	69						96
HJV IDD LPS	52	46.68	10.2503				88	76	20.4396
	54						90
	54						88
	52.8						92
	33						46
	29						43
	34						51
	51						85
	54						86
	53						91
