# Supplementary material for: A crosstalk between hepcidin and IRE/IRP pathways controls ferroportin expression and determines serum iron levels in mice
Source: eLife. 2022 Sep 6;11:e81332. doi: 10.7554/eLife.81332 (PMC9499557; doi:10.7554/eLife.81332)
Supplement: Figure 4—figure supplement 2—source data 1. [file elife-81332-fig4-figsupp2-data1.xlsx]

## Sheet: Set1
		Tfr1	Background			Tfr2	Background			Actin	Background
	wt SD	80.979	111.001			60.396	83.479			43.741	83.791
	wt SD Hep	89.294	101.7			74.986	84.926			43.645	84.218
	wt HID	112.814	114.626			56.718	85.296			47.975	84.892
	wt HID Hep	106.41	109.824			66.495	86.754			49.562	85.896
	ko SD	95.689	103.445			57.744	86.224			44.374	87.202
	ko SD Hep	107.485	111.157			61.995	88.198			39.992	87.141
	ko IDD	92.822	108.561			56.484	87.67			43.483	87.443
	ko IDD Hep	91.716	119.927			86.468	94.151			43.537	88.685
	Invert												Ratio Tfr1	Ratio Tfr2	Normalized Tfr1	Normalized Tfr2
	wt SD	174.021	143.999	30.022		194.604	171.521	23.083		211.259	171.209	40.05	0.749613	0.576355	1	1
	wt SD Hep	165.706	153.3	12.406		180.014	170.074	9.94		211.355	170.782	40.573	0.30577	0.244991	0.407904	0.425069
	wt HID	142.186	140.374	1.812		198.282	169.704	28.578		207.025	170.108	36.917	0.0490831	0.774115	0.0654779	1.34312
	wt HID Hep	148.59	145.176	3.414		188.505	168.246	20.259		205.438	169.104	36.334	0.0939616	0.557577	0.125347	0.96742
	ko SD	159.311	151.555	7.756		197.256	168.776	28.48		210.626	167.798	42.828	0.181096	0.664986	0.241587	1.15378
	ko SD Hep	147.515	143.843	3.672		193.005	166.802	26.203		215.008	167.859	47.149	0.0778808	0.555749	0.103895	0.964248
	ko IDD	162.178	146.439	15.739		198.516	167.33	31.186		211.517	167.557	43.96	0.35803	0.709418	0.47762	1.23087
	ko IDD Hep	163.284	135.073	28.211		168.532	160.849	7.683		211.463	166.315	45.148	0.624856	0.170174	0.833572	0.295259

## Sheet: Set2
		Tfr1	Background			Tfr2	Background			Actin	Background
	wt SD	80.859	122.534			84.495	101.196			73.052	99.808
	wt SD Hep	77.962	120.928			91.872	102.734			71.674	101.325
	wt HID	104.019	120.905			79.544	100.592			69.102	103.185
	wt HID Hep	101.558	118.314			78.313	102.168			71.468	104.57
	ko SD	113.868	121.166			72.213	102.932			68.746	105.624
	ko SD Hep	110.908	118.422			76.803	104.07			75.924	107.361
	ko IDD	90.542	114.418			75.278	105.889			70.535	108.569
	ko IDD Hep	90.462	117.605			102.866	111.738			75.199	112.055
	Invert												Ratio Tfr1	Ratio Tfr2	Normalized Tfr1	Normalized Tfr2
	wt SD	174.141	132.466	41.675		170.505	153.804	16.701		181.948	155.192	26.756	1.55759	0.624196	1	1
	wt SD Hep	177.038	134.072	42.966		163.128	152.266	10.862		183.326	153.675	29.651	1.44906	0.366328	0.930317	0.58688
	wt HID	150.981	134.095	16.886		175.456	154.408	21.048		185.898	151.815	34.083	0.495438	0.617551	0.318079	0.989354
	wt HID Hep	153.442	136.686	16.756		176.687	152.832	23.855		183.532	150.43	33.102	0.506193	0.720651	0.324984	1.15453
	ko SD	141.132	133.834	7.298		182.787	152.068	30.719		186.254	149.376	36.878	0.197896	0.83299	0.127052	1.3345
	ko SD Hep	144.092	136.578	7.514		178.197	150.93	27.267		179.076	147.639	31.437	0.239018	0.867354	0.153453	1.38955
	ko IDD	164.458	140.582	23.876		179.722	149.111	30.611		184.465	146.431	38.034	0.627754	0.804833	0.403028	1.28939
	ko IDD Hep	164.538	137.395	27.143		152.134	143.262	8.872		179.801	142.945	36.856	0.736461	0.240721	0.472819	0.385649
