# Supplementary material for: A crosstalk between hepcidin and IRE/IRP pathways controls ferroportin expression and determines serum iron levels in mice
Source: eLife. 2022 Sep 6;11:e81332. doi: 10.7554/eLife.81332 (PMC9499557; doi:10.7554/eLife.81332)
Supplement: Figure 4—figure supplement 3—source data 1. [file elife-81332-fig4-figsupp3-data1.xlsx]

## Sheet: 809
Fig 3.S3D
Bmp6/RPL 19	Efficiency target	Target Ct 1	Target Ct 2	Target Ct	Delta Ct target	Numerator	Efficiency refer.	Refer. Ct 1	Refer. Ct 2	Refer. Ct	Delta Ct refer.	Denominator	Fold Induction	Bmp6/RPL 19
15	2	29.4495	29.7288	29.5891	-0.709397	0.611576	2	21.8605	21.8495	21.855	-0.188054	0.877789	0.696723	WT ND PBS
16	2	27.8557	28.0693	27.9625	0.917254	1.88852	2	21.1052	21.1828	21.144	0.523034	1.43697	1.31423	WT ND PBS
17	2	29.1887	29.6293	29.409	-0.529233	0.692923	2	21.8429	21.8086	21.8257	-0.158749	0.895802	0.773523	WT ND PBS
51	2	29.1317		29.1317	-0.251972	0.839748	2	21.573		21.573	0.0939703	1.0673	0.786794	WT ND PBS
52	2	29.1546		29.1546	-0.274852	0.826535	2	21.934		21.934	-0.267034	0.831027	0.994595	WT ND PBS
53	2	27.8261		27.8261	1.05363	2.07575	2	21.7869		21.7869	-0.119872	0.920269	2.25559	WT ND PBS
54	2	29.0852		29.0852	-0.20543	0.86728	2	21.5503		21.5503	0.116704	1.08425	0.799886	WT ND PBS
18	2	29.5833	29.9846	29.7839	-0.904167	0.534341	2	21.7996	21.825	21.8123	-0.145281	0.904203	0.590952	WT ND Hep
19	2	29.4877	29.4536	29.4707	-0.590927	0.663916	2	21.7798	21.7747	21.7772	-0.11025	0.926427	0.716641	WT ND Hep
20	2	29.5686	29.6801	29.6244	-0.744604	0.596832	2	21.4218	21.4056	21.4137	0.253293	1.19192	0.500729	WT ND Hep
21	2	29.398	29.6034	29.5007	-0.62098	0.650229	2	21.5875	21.6636	21.6256	0.0414152	1.02912	0.631829	WT ND Hep
22	2	29.9064	30.1999	30.0532	-1.1734	0.443374	2	21.9453	21.9395	21.9424	-0.275454	0.826191	0.536648	WT ND Hep
55	2	28.6832		28.6832	0.19657	1.14597	2	22.1155		22.1155	-0.448527	0.73279	1.56384	WT ND Hep
56	2	28.971		28.971	-0.0912907	0.938683	2	21.6493		21.6493	0.0176649	1.01232	0.927259	WT ND Hep
57	2	30.0279		30.0279	-1.14815	0.451204	2	22.3593		22.3593	-0.692271	0.618879	0.729067	WT ND Hep
38	2	28.5999	28.3643	28.4821	0.397673	1.31738	2	21.75	21.8793	21.8146	-0.147631	0.902732	1.45933	WT CID PBS
39	2	28.6406	28.6062	28.6234	0.256352	1.19445	2	22.2751	22.2325	22.2538	-0.586782	0.665826	1.79394	WT CID PBS
40	2	28.4797	28.3863	28.433	0.446744	1.36296	2	21.9682	22.0892	22.0287	-0.36172	0.778236	1.75135	WT CID PBS
41	2	27.1637	27.9352	27.5495	1.33028	2.51451	2	21.0493		21.0493	0.617642	1.53437	1.6388	WT CID PBS
42	2	27.5486		27.5486	1.33112	2.51598	2	21.8767		21.8767	-0.209664	0.864738	2.90953	WT CID PBS
43	2	27.558		27.558	1.32171	2.49963	2	21.5708		21.5708	0.0962343	1.06898	2.33833	WT CID PBS
44	2	28.2828		28.2828	0.596989	1.51256	2	22.4563		22.4563	-0.789359	0.578601	2.61416	WT CID Hep
45	2	27.7291		27.7291	1.15066	2.22015	2	21.5052		21.5052	0.161801	1.11868	1.98461	WT CID Hep
46	2	28.9608		28.9608	-0.0810902	0.945343	2	22.4655		22.4655	-0.798505	0.574945	1.64423	WT CID Hep
47	2	27.9709		27.9709	0.908868	1.87757	2	21.3697		21.3697	0.297242	1.22879	1.52798	WT CID Hep
48	2	27.1542		27.1542	1.72553	3.30701	2	21.0876		21.0876	0.579431	1.49426	2.21315	WT CID Hep
49	2	28.5499		28.5499	0.329798	1.25684	2	22.2658		22.2658	-0.598807	0.6603	1.90344	WT CID Hep
50	2	28.0391		28.0391	0.840686	1.7909	2	21.9429		21.9429	-0.275882	0.825945	2.1683	WT CID Hep
1	2	27.5864	27.7327	27.6595	1.2202	2.32979	2	21.4865	21.4382	21.4624	0.204612	1.15238	2.02173	HJV ND PBS
2	2	27.2736	27.6194	27.4465	1.43324	2.70053	2	21.767	21.7378	21.7524	-0.085371	0.942542	2.86516	HJV ND PBS
3	2	27.6486	27.6674	27.658	1.22179	2.33235	2	21.9982	21.962	21.9801	-0.313145	0.804885	2.89774	HJV ND PBS
9	2	27.1551	27.2472	27.2012	1.67858	3.20113	2	21.6705	21.7174	21.694	-0.0269823	0.981471	3.26156	HJV ND PBS
10	2	27.639	27.522	27.5805	1.29926	2.46103	2	21.5508	21.4559	21.5033	0.163668	1.12013	2.19709	HJV ND PBS
11	2	27.9998	28.001	28.0004	0.879352	1.83955	2	21.7028	21.7149	21.7088	-0.0418577	0.971403	1.8937	HJV ND PBS
12	2	27.6094	27.5072	27.5583	1.32145	2.49917	2	21.4892	21.4862	21.4877	0.179269	1.13231	2.20714	HJV ND PBS
4	2	27.9834	27.9928	27.9881	0.891623	1.85526	2	21.9796	21.9733	21.9765	-0.30951	0.806916	2.2992	HJV ND Hep
5	2	27.3964	27.1566	27.2765	1.60326	3.03829	2	21.4667	21.5476	21.5072	0.159827	1.11715	2.71968	HJV ND Hep
6	2	27.7639	27.9122	27.8381	1.04168	2.05862	2	23.3779	23.3851	23.3815	-1.71452	0.304703	6.75615	HJV ND Hep
7	2	26.9638	27.0219	26.9929	1.88689	3.69836	2	21.8592	21.7724	21.8158	-0.14882	0.901988	4.10024	HJV ND Hep
8	2	26.6926	26.7509	26.7217	2.15802	4.46301	2	21.5471	21.4945	21.5208	0.146176	1.10663	4.03296	HJV ND Hep
13	2	27.1839	27.4808	27.3323	1.54743	2.92296	2	21.3796	21.3391	21.3593	0.30764	1.23768	2.36164	HJV ND Hep
14	2	27.7654	27.9699	27.8676	1.01213	2.01688	2	22.1316	22.0371	22.0843	-0.417356	0.748795	2.69351	HJV ND Hep
23	2	28.8487	29.106	28.9773	-0.0975707	0.934605	2	21.5508	21.5397	21.5453	0.121725	1.08804	0.858985	HJV IDD PBS
24	2	29.0408	29.2734	29.1571	-0.277379	0.825088	2	21.8121	21.7867	21.7994	-0.132421	0.9123	0.904405	HJV IDD PBS
25	2	30.3369		30.3369	-1.45718	0.364205	2	21.4291	21.6935	21.5613	0.105678	1.076	0.338481	HJV IDD PBS
26	2	30.6772	30.518	30.5976	-1.71786	0.304	2	22.5388	22.5211	22.53	-0.862963	0.549822	0.552905	HJV IDD PBS
27	2	29.3705	29.1956	29.2831	-0.403321	0.756116	2	21.5911	21.567	21.5791	0.0879107	1.06283	0.711418	HJV IDD PBS
28	2	29.0216	29.002	29.0118	-0.132064	0.912525	2	20.9543	21.0247	20.9895	0.677526	1.59939	0.570544	HJV IDD PBS
29	2	30.2332	30.4462	30.3397	-1.45992	0.363513	2	22.639	22.5504	22.5947	-0.927726	0.525686	0.691503	HJV IDD PBS
30	2	30.3092	30.3509	30.33	-1.45027	0.365952	2	22.3962	22.1562	22.2762	-0.609204	0.655558	0.55823	HJV IDD Hep
31	2	30.0476	29.9344	29.991	-1.11126	0.462891	2	21.914	21.9796	21.9468	-0.279783	0.823715	0.561955	HJV IDD Hep
32	2	30.924	30.8709	30.8974	-2.0177	0.246952	2	22.802	22.8235	22.8127	-1.14575	0.451954	0.546409	HJV IDD Hep
33	2	29.2813	29.3281	29.3047	-0.424928	0.744876	2	21.7341	21.8238	21.779	-0.111979	0.925318	0.804995	HJV IDD Hep
35	2	28.9189	28.7618	28.8404	0.0393941	1.02768	2	21.3566	21.3721	21.3643	0.302662	1.23342	0.833199	HJV IDD Hep
36	2	29.1458	29.1094	29.1276	-0.247871	0.842138	2	21.5771	21.614	21.5956	0.0714321	1.05076	0.801457	HJV IDD Hep
37	2	30.5784	30.2987	30.4385	-1.55877	0.339441	2	22.1392	22.1082	22.1237	-0.456699	0.728651	0.465848	HJV IDD Hep
		34.4387		28.8797				34.9227		21.667
Fig 3.S3C
ID1/RPL 19	Efficiency target	Target Ct 1	Target Ct 2	Target Ct	Delta Ct target	Numerator	Efficiency refer.	Refer. Ct 1	Refer. Ct 2	Refer. Ct	Delta Ct refer.	Denominator	Fold Induction	ID1/RPL 19
15	2	29.4494	29.3176	29.3835	-0.527395	0.693806	2	21.8605	21.8495	21.855	-0.188054	0.877789	0.790402	WT ND PBS
16	2	27.9951	28.0279	28.0115	0.844645	1.79582	2	21.1052	21.1828	21.144	0.523034	1.43697	1.24973	WT ND PBS
17	2	29.0968	29.1699	29.1334	-0.277237	0.82517	2	21.8429	21.8086	21.8257	-0.158749	0.895802	0.921153	WT ND PBS
51	2	28.4132		28.4132	0.442975	1.3594	2	21.573		21.573	0.0939703	1.0673	1.27368	WT ND PBS
52	2	28.9855		28.9855	-0.129372	0.914229	2	21.934		21.934	-0.267034	0.831027	1.10012	WT ND PBS
53	2	28.6736		28.6736	0.182506	1.13485	2	21.7869		21.7869	-0.119872	0.920269	1.23318	WT ND PBS
54	2	29.3923		29.3923	-0.536122	0.689622	2	21.5503		21.5503	0.116704	1.08425	0.636033	WT ND PBS
18	2	29.8066	29.6962	29.7514	-0.895289	0.537639	2	21.7996	21.825	21.8123	-0.145281	0.904203	0.5946	WT ND Hep
19	2	30.1256	30.2505	30.1881	-1.33193	0.397235	2	21.7798	21.7747	21.7772	-0.11025	0.926427	0.428782	WT ND Hep
20	2	30.4599	30.963	30.7115	-1.85532	0.276371	2	21.4218	21.4056	21.4137	0.253293	1.19192	0.23187	WT ND Hep
21	2	31.0329	31.122	31.0774	-2.2213	0.214447	2	21.5875	21.6636	21.6256	0.0414152	1.02912	0.208379	WT ND Hep
22	2	30.9654	31.1748	31.0701	-2.21399	0.215537	2	21.9453	21.9395	21.9424	-0.275454	0.826191	0.26088	WT ND Hep
55	2	29.3934		29.3934	-0.537301	0.689059	2	22.1155		22.1155	-0.448527	0.73279	0.940322	WT ND Hep
56	2	29.1647		29.1647	-0.308598	0.807426	2	21.6493		21.6493	0.0176649	1.01232	0.7976	WT ND Hep
57	2	29.906		29.906	-1.04982	0.483029	2	22.3593		22.3593	-0.692271	0.618879	0.780491	WT ND Hep
38	2	28.5654	28.0088	28.2871	0.569007	1.4835	2	21.75	21.8793	21.8146	-0.147631	0.902732	1.64335	WT CID PBS
39	2	27.1137	27.0247	27.0692	1.78693	3.4508	2	22.2751	22.2325	22.2538	-0.586782	0.665826	5.18274	WT CID PBS
40	2	25.8761	25.8166	25.8463	3.00978	8.05444	2	21.9682	22.0892	22.0287	-0.36172	0.778236	10.3496	WT CID PBS
41	2	24.744		24.744	4.11212	17.293	2	21.0493		21.0493	0.617642	1.53437	11.2705	WT CID PBS
42	2	25.0343		25.0343	3.82183	14.1412	2	21.8767		21.8767	-0.209664	0.864738	16.3531	WT CID PBS
43	2	25.2111		25.2111	3.64507	12.5106	2	21.5708		21.5708	0.0962343	1.06898	11.7033	WT CID PBS
44	2	27.1488		27.1488	1.70729	3.26546	2	22.4563		22.4563	-0.789359	0.578601	5.64372	WT CID Hep
45	2	27.7261		27.7261	1.13004	2.18865	2	21.5052		21.5052	0.161801	1.11868	1.95645	WT CID Hep
46	2	27.7693		27.7693	1.08686	2.12412	2	22.4655		22.4655	-0.798505	0.574945	3.69447	WT CID Hep
47	2	25.6559		25.6559	3.20022	9.191	2	21.3697		21.3697	0.297242	1.22879	7.47969	WT CID Hep
48	2	25.1148		25.1148	3.74138	13.3742	2	21.0876		21.0876	0.579431	1.49426	8.95038	WT CID Hep
49	2	26.8849		26.8849	1.97127	3.92113	2	22.2658		22.2658	-0.598807	0.6603	5.93841	WT CID Hep
50	2	25.4922		25.4922	3.36397	10.2957	2	21.9429		21.9429	-0.275882	0.825945	12.4654	WT CID Hep
1	2	28.7094	28.637	28.6732	0.182955	1.13521	2	21.4865	21.4382	21.4624	0.204612	1.15238	0.985101	HJV ND PBS
2	2	28.9049	29.1136	29.0092	-0.153099	0.899317	2	21.767	21.7378	21.7524	-0.085371	0.942542	0.95414	HJV ND PBS
3	2	28.9013	29.2122	29.0568	-0.200639	0.870165	2	21.9982	21.962	21.9801	-0.313145	0.804885	1.0811	HJV ND PBS
9	2	29.1476	28.9995	29.0735	-0.217413	0.860107	2	21.6705	21.7174	21.694	-0.0269823	0.981471	0.876344	HJV ND PBS
10	2	28.8795	29.0165	28.948	-0.0918214	0.938337	2	21.5508	21.4559	21.5033	0.163668	1.12013	0.837703	HJV ND PBS
11	2	30.1281	29.8396	29.9838	-1.1277	0.457645	2	21.7028	21.7149	21.7088	-0.0418577	0.971403	0.471118	HJV ND PBS
12	2	29.2957	29.2932	29.2944	-0.438271	0.738018	2	21.4892	21.4862	21.4877	0.179269	1.13231	0.651781	HJV ND PBS
4	2	29.6103	29.9701	29.7902	-0.934061	0.523383	2	21.9796	21.9733	21.9765	-0.30951	0.806916	0.648622	HJV ND Hep
5	2	28.0653	28.3116	28.1884	0.667707	1.58855	2	21.4667	21.5476	21.5072	0.159827	1.11715	1.42196	HJV ND Hep
6	2	29.4621	29.4427	29.4524	-0.596269	0.661462	2	23.3779	23.3851	23.3815	-1.71452	0.304703	2.17084	HJV ND Hep
7	2	28.7719	28.7417	28.7568	0.0993398	1.07128	2	21.8592	21.7724	21.8158	-0.14882	0.901988	1.18769	HJV ND Hep
8	2	28.3178	28.1062	28.212	0.644111	1.56278	2	21.5471	21.4945	21.5208	0.146176	1.10663	1.41219	HJV ND Hep
13	2	28.9228	29.1336	29.0282	-0.172067	0.88757	2	21.3796	21.3391	21.3593	0.30764	1.23768	0.717123	HJV ND Hep
14	2	29.3565	29.7813	29.5689	-0.712739	0.610161	2	22.1316	22.0371	22.0843	-0.417356	0.748795	0.814856	HJV ND Hep
23	2	30.2307	30.5668	30.3988	-1.54265	0.343256	2	21.5508	21.5397	21.5453	0.121725	1.08804	0.315482	HJV IDD PBS
24	2	29.5936	29.7867	29.6901	-0.83399	0.560976	2	21.8121	21.7867	21.7994	-0.132421	0.9123	0.614903	HJV IDD PBS
25	2	29.2362	29.0678	29.152	-0.295871	0.81458	2	21.4291	21.6935	21.5613	0.105678	1.076	0.757045	HJV IDD PBS
26	2	30.4537	30.442	30.4478	-1.59168	0.331786	2	22.5388	22.5211	22.53	-0.862963	0.549822	0.603442	HJV IDD PBS
27	2	29.1816	30.0592	29.6204	-0.764262	0.588754	2	21.5911	21.567	21.5791	0.0879107	1.06283	0.55395	HJV IDD PBS
28	2	30.4205	31.3065	30.8635	-2.00734	0.248731	2	20.9543	21.0247	20.9895	0.677526	1.59939	0.155516	HJV IDD PBS
29	2	32.364	32.8165	32.5902	-3.73411	0.0751486	2	22.639	22.5504	22.5947	-0.927726	0.525686	0.142953	HJV IDD PBS
30	2	30.9599	31.2419	31.1009	-2.24477	0.210987	2	22.3962	22.1562	22.2762	-0.609204	0.655558	0.321844	HJV IDD Hep
31	2	30.3516	30.3546	30.3531	-1.49695	0.354302	2	21.914	21.9796	21.9468	-0.279783	0.823715	0.430127	HJV IDD Hep
32	2	30.9873	30.7963	30.8918	-2.03568	0.243893	2	22.802	22.8235	22.8127	-1.14575	0.451954	0.539641	HJV IDD Hep
33	2	29.4173	29.1935	29.3054	-0.449284	0.732406	2	21.7341	21.8238	21.779	-0.111979	0.925318	0.791519	HJV IDD Hep
35	2	29.7438	29.445	29.5944	-0.738255	0.599464	2	21.3566	21.3721	21.3643	0.302662	1.23342	0.486018	HJV IDD Hep
36	2	30.5222	30.2832	30.4027	-1.54655	0.342327	2	21.5771	21.614	21.5956	0.0714321	1.05076	0.32579	HJV IDD Hep
37	2	32.5551	31.9476	32.2513	-3.39521	0.0950473	2	22.1392	22.1082	22.1237	-0.456699	0.728651	0.130443	HJV IDD Hep
		Undetermined		28.8561				34.9227		21.667
Fig. 3.S3A
FPN+/RPL 19	Efficiency target	Target Ct 1	Target Ct 2	Target Ct	Delta Ct target	Numerator	Efficiency refer.	Refer. Ct 1	Refer. Ct 2	Refer. Ct	Delta Ct refer.	Denominator	Fold Induction	FPN+/RPL 19
15	2	24.8286	24.8652	24.8469	-0.697692	0.616558	2	21.8605	21.8495	21.855	-0.188054	0.877789	0.702399	WT ND PBS
16	2	23.8835	23.8727	23.8781	0.271072	1.2067	2	21.1052	21.1828	21.144	0.523034	1.43697	0.839754	WT ND PBS
17	2	24.171	24.1404	24.1557	-0.00651482	0.995494	2	21.8429	21.8086	21.8257	-0.158749	0.895802	1.11129	WT ND PBS
51	2	23.7793		23.7793	0.369858	1.29223	2	21.573		21.573	0.0939703	1.0673	1.21074	WT ND PBS
52	2	23.9933		23.9933	0.155906	1.11412	2	21.934		21.934	-0.267034	0.831027	1.34066	WT ND PBS
53	2	24.6902		24.6902	-0.541001	0.687294	2	21.7869		21.7869	-0.119872	0.920269	0.74684	WT ND PBS
54	2	23.7008		23.7008	0.448372	1.3645	2	21.5503		21.5503	0.116704	1.08425	1.25847	WT ND PBS
18	2	23.8236	23.8302	23.8269	0.322309	1.25033	2	21.7996	21.825	21.8123	-0.145281	0.904203	1.3828	WT ND Hep
19	2	24.3362	24.364	24.3501	-0.200957	0.869974	2	21.7798	21.7747	21.7772	-0.11025	0.926427	0.939063	WT ND Hep
20	2	23.259	23.2827	23.2709	0.878295	1.8382	2	21.4218	21.4056	21.4137	0.253293	1.19192	1.54221	WT ND Hep
21	2	24.1164	24.0674	24.0919	0.057245	1.04048	2	21.5875	21.6636	21.6256	0.0414152	1.02912	1.01103	WT ND Hep
22	2	24.3871	24.3095	24.3483	-0.199108	0.871089	2	21.9453	21.9395	21.9424	-0.275454	0.826191	1.05434	WT ND Hep
55	2	23.8097		23.8097	0.339441	1.26527	2	22.1155		22.1155	-0.448527	0.73279	1.72664	WT ND Hep
56	2	23.9266		23.9266	0.222587	1.16682	2	21.6493		21.6493	0.0176649	1.01232	1.15262	WT ND Hep
57	2	24.7061		24.7061	-0.556887	0.679767	2	22.3593		22.3593	-0.692271	0.618879	1.09839	WT ND Hep
38	2	23.403	23.3273	23.3652	0.784009	1.72191	2	21.75	21.8793	21.8146	-0.147631	0.902732	1.90744	WT CID PBS
39	2	23.4174	23.446	23.4317	0.717447	1.64427	2	22.2751	22.2325	22.2538	-0.586782	0.665826	2.46952	WT CID PBS
40	2	23.5678	23.5578	23.5628	0.586367	1.50146	2	21.9682	22.0892	22.0287	-0.36172	0.778236	1.92931	WT CID PBS
41	2	22.894		22.894	1.25521	2.38701	2	21.0493		21.0493	0.617642	1.53437	1.5557	WT CID PBS
42	2	23.1168		23.1168	1.03239	2.04542	2	21.8767		21.8767	-0.209664	0.864738	2.36536	WT CID PBS
43	2	22.8666		22.8666	1.28257	2.43271	2	21.5708		21.5708	0.0962343	1.06898	2.27573	WT CID PBS
44	2	23.7182		23.7182	0.430961	1.34813	2	22.4563		22.4563	-0.789359	0.578601	2.32998	WT CID Hep
45	2	23.1019		23.1019	1.04731	2.06667	2	21.5052		21.5052	0.161801	1.11868	1.84742	WT CID Hep
46	2	24.059		24.059	0.0901734	1.0645	2	22.4655		22.4655	-0.798505	0.574945	1.85148	WT CID Hep
47	2	22.6787		22.6787	1.47045	2.77108	2	21.3697		21.3697	0.297242	1.22879	2.25512	WT CID Hep
48	2	22.4405		22.4405	1.70863	3.26851	2	21.0876		21.0876	0.579431	1.49426	2.18738	WT CID Hep
49	2	23.8432		23.8432	0.305971	1.23625	2	22.2658		22.2658	-0.598807	0.6603	1.87226	WT CID Hep
50	2	23.4962		23.4962	0.652952	1.57238	2	21.9429		21.9429	-0.275882	0.825945	1.90374	WT CID Hep
1	2	23.0139	23.0177	23.0158	1.13337	2.19371	2	21.4865	21.4382	21.4624	0.204612	1.15238	1.90364	HJV ND PBS
2	2	23.6385	23.5896	23.614	0.535126	1.44907	2	21.767	21.7378	21.7524	-0.085371	0.942542	1.53741	HJV ND PBS
3	2	23.635	23.6443	23.6397	0.509519	1.42358	2	21.9982	21.962	21.9801	-0.313145	0.804885	1.76867	HJV ND PBS
9	2	22.9749	23.1216	23.0483	1.10089	2.14487	2	21.6705	21.7174	21.694	-0.0269823	0.981471	2.18536	HJV ND PBS
10	2	23.0322	22.9577	22.995	1.15421	2.22562	2	21.5508	21.4559	21.5033	0.163668	1.12013	1.98693	HJV ND PBS
11	2	23.5008	23.3601	23.4304	0.71877	1.64578	2	21.7028	21.7149	21.7088	-0.0418577	0.971403	1.69423	HJV ND PBS
12	2	22.9767	22.9876	22.9821	1.16705	2.24552	2	21.4892	21.4862	21.4877	0.179269	1.13231	1.98313	HJV ND PBS
4	2	23.8744	23.7695	23.822	0.327212	1.25459	2	21.9796	21.9733	21.9765	-0.30951	0.806916	1.55479	HJV ND Hep
5	2	23.2799	23.1872	23.2335	0.91563	1.88639	2	21.4667	21.5476	21.5072	0.159827	1.11715	1.68857	HJV ND Hep
6	2	24.6769	24.6947	24.6858	-0.536621	0.689383	2	23.3779	23.3851	23.3815	-1.71452	0.304703	2.26247	HJV ND Hep
7	2	23.5533	23.3206	23.437	0.712206	1.63831	2	21.8592	21.7724	21.8158	-0.14882	0.901988	1.81633	HJV ND Hep
8	2	23.061	22.9953	23.0281	1.12106	2.17507	2	21.5471	21.4945	21.5208	0.146176	1.10663	1.96549	HJV ND Hep
13	2	23.2209	23.1536	23.1872	0.961942	1.94793	2	21.3796	21.3391	21.3593	0.30764	1.23768	1.57385	HJV ND Hep
14	2	24.5467	24.4391	24.4929	-0.343699	0.788018	2	22.1316	22.0371	22.0843	-0.417356	0.748795	1.05238	HJV ND Hep
23	2	23.7327	23.7763	23.7545	0.394645	1.31462	2	21.5508	21.5397	21.5453	0.121725	1.08804	1.20825	HJV IDD PBS
24	2	24.2388	24.2581	24.2484	-0.0992568	0.933514	2	21.8121	21.7867	21.7994	-0.132421	0.9123	1.02325	HJV IDD PBS
25	2	24.0742	24.0899	24.0821	0.0671231	1.04763	2	21.4291	21.6935	21.5613	0.105678	1.076	0.97363	HJV IDD PBS
26	2	24.9778	24.9923	24.985	-0.835841	0.560256	2	22.5388	22.5211	22.53	-0.862963	0.549822	1.01898	HJV IDD PBS
27	2	23.4662	23.5224	23.4943	0.654892	1.5745	2	21.5911	21.567	21.5791	0.0879107	1.06283	1.48142	HJV IDD PBS
28	2	23.1532	23.1737	23.1634	0.985739	1.98033	2	20.9543	21.0247	20.9895	0.677526	1.59939	1.23817	HJV IDD PBS
29	2	24.4565	24.5948	24.5256	-0.376442	0.770335	2	22.639	22.5504	22.5947	-0.927726	0.525686	1.46539	HJV IDD PBS
30	2	24.2472	24.1958	24.2215	-0.0723136	0.951112	2	22.3962	22.1562	22.2762	-0.609204	0.655558	1.45084	HJV IDD Hep
31	2	24.1133	24.1812	24.1472	0.00194522	1.00135	2	21.914	21.9796	21.9468	-0.279783	0.823715	1.21565	HJV IDD Hep
32	2	25.4472	25.465	25.4561	-1.30697	0.404169	2	22.802	22.8235	22.8127	-1.14575	0.451954	0.894269	HJV IDD Hep
33	2	24.0172	24.0879	24.0526	0.0965955	1.06925	2	21.7341	21.8238	21.779	-0.111979	0.925318	1.15555	HJV IDD Hep
35	2	23.2461	23.3708	23.3084	0.840732	1.79096	2	21.3566	21.3721	21.3643	0.302662	1.23342	1.45203	HJV IDD Hep
36	2	23.5397	23.5819	23.5608	0.588381	1.50356	2	21.5771	21.614	21.5956	0.0714321	1.05076	1.43093	HJV IDD Hep
37	2	24.4795	24.4522	24.4659	-0.3167	0.802904	2	22.1392	22.1082	22.1237	-0.456699	0.728651	1.1019	HJV IDD Hep
		36.6105		24.1492				34.9227		21.667
Fig 3.S3H
Tfr1/RPL 19	Efficiency target	Target Ct 1	Target Ct 2	Target Ct	Delta Ct target	Numerator	Efficiency refer.	Refer. Ct 1	Refer. Ct 2	Refer. Ct	Delta Ct refer.	Denominator	Fold Induction	Tfr1/RPL 19
15	2	27.4084	27.5473	27.4778	-0.436116	0.739122	2	21.8605	21.8495	21.855	-0.188054	0.877789	0.842027	WT ND PBS
16	2	26.2739	26.2826	26.2782	0.763498	1.6976	2	21.1052	21.1828	21.144	0.523034	1.43697	1.18137	WT ND PBS
17	2	26.9266	26.9082	26.9174	0.124344	1.09001	2	21.8429	21.8086	21.8257	-0.158749	0.895802	1.2168	WT ND PBS
51	2	27.24		27.24	-0.198269	0.871596	2	21.573		21.573	0.0939703	1.0673	0.816634	WT ND PBS
52	2	27.4957		27.4957	-0.453991	0.730021	2	21.934		21.934	-0.267034	0.831027	0.878457	WT ND PBS
53	2	27.3775		27.3775	-0.335802	0.792344	2	21.7869		21.7869	-0.119872	0.920269	0.860991	WT ND PBS
54	2	26.5054		26.5054	0.536335	1.45028	2	21.5503		21.5503	0.116704	1.08425	1.33759	WT ND PBS
18	2	26.3364	26.2746	26.3055	0.73623	1.66582	2	21.7996	21.825	21.8123	-0.145281	0.904203	1.8423	WT ND Hep
19	2	27.9614	28.1248	28.0431	-1.00136	0.49953	2	21.7798	21.7747	21.7772	-0.11025	0.926427	0.5392	WT ND Hep
20	2	25.8498	25.7809	25.8154	1.22637	2.33977	2	21.4218	21.4056	21.4137	0.253293	1.19192	1.96302	WT ND Hep
21	2	26.8467	26.7848	26.8158	0.225969	1.16956	2	21.5875	21.6636	21.6256	0.0414152	1.02912	1.13647	WT ND Hep
22	2	26.9427	26.8956	26.9191	0.122586	1.08868	2	21.9453	21.9395	21.9424	-0.275454	0.826191	1.31772	WT ND Hep
55	2	27.433		27.433	-0.391247	0.76247	2	22.1155		22.1155	-0.448527	0.73279	1.0405	WT ND Hep
56	2	27.6233		27.6233	-0.581552	0.668244	2	21.6493		21.6493	0.0176649	1.01232	0.660112	WT ND Hep
57	2	28.3568		28.3568	-1.31508	0.401904	2	22.3593		22.3593	-0.692271	0.618879	0.649406	WT ND Hep
38	2	28.7727	28.7461	28.7594	-1.71768	0.304037	2	21.75	21.8793	21.8146	-0.147631	0.902732	0.336796	WT CID PBS
39	2	28.5026	28.9789	28.7407	-1.699	0.308	2	22.2751	22.2325	22.2538	-0.586782	0.665826	0.462583	WT CID PBS
40	2	29.0504	28.9493	28.9998	-1.95809	0.25737	2	21.9682	22.0892	22.0287	-0.36172	0.778236	0.330709	WT CID PBS
41	2	28.1974		28.1974	-1.15567	0.448858	2	21.0493		21.0493	0.617642	1.53437	0.292537	WT CID PBS
42	2	28.087		28.087	-1.04525	0.484562	2	21.8767		21.8767	-0.209664	0.864738	0.560356	WT CID PBS
43	2	28.4045		28.4045	-1.36281	0.388824	2	21.5708		21.5708	0.0962343	1.06898	0.363734	WT CID PBS
44	2	28.8767		28.8767	-1.835	0.280292	2	22.4563		22.4563	-0.789359	0.578601	0.484431	WT CID Hep
45	2	28.539		28.539	-1.4973	0.354215	2	21.5052		21.5052	0.161801	1.11868	0.316635	WT CID Hep
46	2	29.1062		29.1062	-2.06444	0.239079	2	22.4655		22.4655	-0.798505	0.574945	0.41583	WT CID Hep
47	2	27.6764		27.6764	-0.634662	0.644091	2	21.3697		21.3697	0.297242	1.22879	0.524166	WT CID Hep
48	2	27.0609		27.0609	-0.0191573	0.986809	2	21.0876		21.0876	0.579431	1.49426	0.6604	WT CID Hep
49	2	29.5991		29.5991	-2.55742	0.169879	2	22.2658		22.2658	-0.598807	0.6603	0.257276	WT CID Hep
50	2	28.5522		28.5522	-1.51044	0.351004	2	21.9429		21.9429	-0.275882	0.825945	0.424972	WT CID Hep
1	2	29.0217	28.579	28.8004	-1.75863	0.295528	2	21.4865	21.4382	21.4624	0.204612	1.15238	0.256451	HJV ND PBS
2	2	28.9636	28.9581	28.9608	-1.9191	0.264419	2	21.767	21.7378	21.7524	-0.085371	0.942542	0.280539	HJV ND PBS
3	2	29.4137	29.3762	29.3949	-2.35322	0.195709	2	21.9982	21.962	21.9801	-0.313145	0.804885	0.243151	HJV ND PBS
9	2	28.9638	28.9168	28.9403	-1.89858	0.268208	2	21.6705	21.7174	21.694	-0.0269823	0.981471	0.273271	HJV ND PBS
10	2	29.0386	28.9427	28.9907	-1.94894	0.259007	2	21.5508	21.4559	21.5033	0.163668	1.12013	0.231229	HJV ND PBS
11	2	28.6564	28.9073	28.7819	-1.74015	0.299339	2	21.7028	21.7149	21.7088	-0.0418577	0.971403	0.308151	HJV ND PBS
12	2	29.1267	29.2274	29.1771	-2.13535	0.227612	2	21.4892	21.4862	21.4877	0.179269	1.13231	0.201015	HJV ND PBS
4	2	29.0441	28.9749	29.0095	-1.96777	0.255647	2	21.9796	21.9733	21.9765	-0.30951	0.806916	0.31682	HJV ND Hep
5	2	28.9101	28.8333	28.8717	-1.82997	0.281271	2	21.4667	21.5476	21.5072	0.159827	1.11715	0.251775	HJV ND Hep
6	2	31.3875	30.9521	31.1698	-4.12808	0.0571906	2	23.3779	23.3851	23.3815	-1.71452	0.304703	0.187693	HJV ND Hep
7	2	29.1751	29.0486	29.1118	-2.07009	0.238145	2	21.8592	21.7724	21.8158	-0.14882	0.901988	0.264023	HJV ND Hep
8	2	28.9999	28.7893	28.8946	-1.85291	0.276833	2	21.5471	21.4945	21.5208	0.146176	1.10663	0.250158	HJV ND Hep
13	2	28.4706	28.8169	28.6438	-1.60203	0.329414	2	21.3796	21.3391	21.3593	0.30764	1.23768	0.266154	HJV ND Hep
14	2	29.9916	29.9219	29.9567	-2.915	0.132586	2	22.1316	22.0371	22.0843	-0.417356	0.748795	0.177066	HJV ND Hep
23	2	28.5085	28.7376	28.623	-1.58129	0.334182	2	21.5508	21.5397	21.5453	0.121725	1.08804	0.307143	HJV IDD PBS
24	2	28.584	28.5306	28.5573	-1.51554	0.349764	2	21.8121	21.7867	21.7994	-0.132421	0.9123	0.383388	HJV IDD PBS
25	2	24.7692	24.8606	24.8149	2.22684	4.68106	2	21.4291	21.6935	21.5613	0.105678	1.076	4.35043	HJV IDD PBS
26	2	27.2297	27.3541	27.2919	-0.250174	0.840795	2	22.5388	22.5211	22.53	-0.862963	0.549822	1.52921	HJV IDD PBS
27	2	27.5076	27.6748	27.5912	-0.549453	0.683279	2	21.5911	21.567	21.5791	0.0879107	1.06283	0.642887	HJV IDD PBS
28	2	26.6919	26.7817	26.7368	0.304957	1.23538	2	20.9543	21.0247	20.9895	0.677526	1.59939	0.772406	HJV IDD PBS
29	2	28.605	28.7003	28.6526	-1.61089	0.327396	2	22.639	22.5504	22.5947	-0.927726	0.525686	0.622798	HJV IDD PBS
30	2	28.7632	28.5381	28.6506	-1.60889	0.327851	2	22.3962	22.1562	22.2762	-0.609204	0.655558	0.50011	HJV IDD Hep
31	2	26.8733	26.7825	26.8279	0.213803	1.15974	2	21.914	21.9796	21.9468	-0.279783	0.823715	1.40794	HJV IDD Hep
32	2	28.9951	29.1266	29.0609	-2.01913	0.246707	2	22.802	22.8235	22.8127	-1.14575	0.451954	0.545867	HJV IDD Hep
33	2	27.5579	27.7753	27.6666	-0.624875	0.648476	2	21.7341	21.8238	21.779	-0.111979	0.925318	0.700815	HJV IDD Hep
35	2	28.1781	28.0708	28.1244	-1.08271	0.472141	2	21.3566	21.3721	21.3643	0.302662	1.23342	0.382791	HJV IDD Hep
36	2	28.7855	28.803	28.7943	-1.75255	0.296777	2	21.5771	21.614	21.5956	0.0714321	1.05076	0.28244	HJV IDD Hep
37	2	29.0331	29.1809	29.107	-2.06529	0.238938	2	22.1392	22.1082	22.1237	-0.456699	0.728651	0.327919	HJV IDD Hep
		36.828		27.0417				34.9227		21.667
Fig3.S3F
Zip14/RPL19	Efficiency target	Target Ct 1	Target Ct 2	Target Ct	Delta Ct target	Numerator	Efficiency refer.	Refer. Ct 1	Refer. Ct 2	Refer. Ct	Delta Ct refer.	Denominator	Fold Induction	Zip14/RPL 19
15	2	23.5504	23.5227	23.5366	0.722463	1.65	2	21.8605	21.8495	21.855	-0.188054	0.877789	1.87972	WT ND PBS
16	2	23.7182	23.6463	23.6822	0.576836	1.49157	2	21.1052	21.1828	21.144	0.523034	1.43697	1.038	WT ND PBS
17	2	23.9641	24.0516	24.0079	0.251182	1.19018	2	21.8429	21.8086	21.8257	-0.158749	0.895802	1.32862	WT ND PBS
51	2	24.4399	24.4332	24.4366	-0.177511	0.884227	2	21.573		21.573	0.0939703	1.0673	0.828469	WT ND PBS
52	2	24.7021	24.6847	24.6934	-0.434354	0.740025	2	21.934		21.934	-0.267034	0.831027	0.890495	WT ND PBS
53	2	25.2157	25.1796	25.1977	-0.938616	0.521733	2	21.7869		21.7869	-0.119872	0.920269	0.566935	WT ND PBS
18	2	24.0518	24.0605	24.0561	0.202917	1.15102	2	21.7996	21.825	21.8123	-0.145281	0.904203	1.27297	WT ND Hep
19	2	24.1391	24.02	24.0795	0.179506	1.1325	2	21.7798	21.7747	21.7772	-0.11025	0.926427	1.22243	WT ND Hep
20	2	23.7408	23.6472	23.694	0.565042	1.47943	2	21.4218	21.4056	21.4137	0.253293	1.19192	1.24121	WT ND Hep
21	2	23.7265	23.7095	23.718	0.541062	1.45504	2	21.5875	21.6636	21.6256	0.0414152	1.02912	1.41387	WT ND Hep
22	2	24.3722	24.32	24.3461	-0.0870711	0.941432	2	21.9453	21.9395	21.9424	-0.275454	0.826191	1.13949	WT ND Hep
55	2	24.4214	24.6231	24.5222	-0.263186	0.833246	2	22.1155		22.1155	-0.448527	0.73279	1.13709	WT ND Hep
38	2	24.4713	24.3962	24.4338	-0.174714	0.885943	2	21.75	21.8793	21.8146	-0.147631	0.902732	0.981403	WT CID PBS
39	2	25.1591	25.1247	25.1419	-0.882832	0.542302	2	22.2751	22.2325	22.2538	-0.586782	0.665826	0.814479	WT CID PBS
40	2	24.7517	24.7224	24.7371	-0.478031	0.717957	2	21.9682	22.0892	22.0287	-0.36172	0.778236	0.922544	WT CID PBS
41	2	24.1881	24.2107	24.1994	0.0596622	1.04222	2	21.0493		21.0493	0.617642	1.53437	0.679252	WT CID PBS
42	2	24.8365	24.8466	24.8416	-0.582554	0.667781	2	21.8767		21.8767	-0.209664	0.864738	0.772234	WT CID PBS
43	2	24.8534	24.6963	24.7748	-0.515779	0.699415	2	21.5708		21.5708	0.0962343	1.06898	0.654283	WT CID PBS
44	2	24.6133	24.712	24.6626	-0.403584	0.755978	2	22.4563		22.4563	-0.789359	0.578601	1.30656	WT CID Hep
45	2	23.9543	23.8855	23.9199	0.339132	1.26499	2	21.5052		21.5052	0.161801	1.11868	1.13079	WT CID Hep
46	2	25.2377	25.6373	25.4375	-1.17846	0.441823	2	22.4655		22.4655	-0.798505	0.574945	0.768461	WT CID Hep
47	2	24.4639	24.5331	24.4985	-0.239485	0.847047	2	21.3697		21.3697	0.297242	1.22879	0.689333	WT CID Hep
48	2	23.9491	23.6439	23.7965	0.462572	1.378	2	21.0876		21.0876	0.579431	1.49426	0.922194	WT CID Hep
49	2	25.3468	25.2462	25.2965	-1.03745	0.487187	2	22.2658		22.2658	-0.598807	0.6603	0.737827	WT CID Hep
1	2	24.1985	24.2036	24.201	0.058019	1.04104	2	21.4865	21.4382	21.4624	0.204612	1.15238	0.903381	HJV ND PBS
2	2	24.0202	23.9418	23.981	0.278049	1.21255	2	21.767	21.7378	21.7524	-0.085371	0.942542	1.28647	HJV ND PBS
3	2	24.1607	24.7479	24.4543	-0.195271	0.873409	2	21.9982	21.962	21.9801	-0.313145	0.804885	1.08513	HJV ND PBS
9	2	24.8314	24.3964	24.6139	-0.354828	0.781963	2	21.6705	21.7174	21.694	-0.0269823	0.981471	0.796726	HJV ND PBS
10	2	24.2883	24.1103	24.1993	0.0597022	1.04225	2	21.5508	21.4559	21.5033	0.163668	1.12013	0.930472	HJV ND PBS
11	2	23.84	23.7191	23.7796	0.479471	1.39423	2	21.7028	21.7149	21.7088	-0.0418577	0.971403	1.43528	HJV ND PBS
4	2	24.0696	24.0967	24.0832	0.175884	1.12966	2	21.9796	21.9733	21.9765	-0.30951	0.806916	1.39997	HJV ND Hep
5	2	23.0129	23.0744	23.0436	1.21542	2.32209	2	21.4667	21.5476	21.5072	0.159827	1.11715	2.07858	HJV ND Hep
6	2	24.7104	25.1404	24.9254	-0.66637	0.63009	2	23.3779	23.3851	23.3815	-1.71452	0.304703	2.06788	HJV ND Hep
7	2	25.1261	23.7975	24.4618	-0.202802	0.868861	2	21.8592	21.7724	21.8158	-0.14882	0.901988	0.963274	HJV ND Hep
8	2	23.6103	23.4845	23.5474	0.711649	1.63768	2	21.5471	21.4945	21.5208	0.146176	1.10663	1.47987	HJV ND Hep
13	2	23.9982	24.0226	24.0104	0.248613	1.18806	2	21.3796	21.3391	21.3593	0.30764	1.23768	0.959911	HJV ND Hep
23	2	23.5475	23.5643	23.5559	0.703116	1.62802	2	21.5508	21.5397	21.5453	0.121725	1.08804	1.49629	HJV IDD PBS
24	2	23.704	23.824	23.764	0.495039	1.40936	2	21.8121	21.7867	21.7994	-0.132421	0.9123	1.54484	HJV IDD PBS
25	2	25.4267	26.0492	25.738	-1.47891	0.358759	2	21.4291	21.6935	21.5613	0.105678	1.076	0.333419	HJV IDD PBS
26	2	26.437	25.7209	26.079	-1.81991	0.283238	2	22.5388	22.5211	22.53	-0.862963	0.549822	0.515145	HJV IDD PBS
27	2	24.2598	24.1304	24.1951	0.0639423	1.04532	2	21.5911	21.567	21.5791	0.0879106	1.06283	0.983524	HJV IDD PBS
28	2	23.3252	23.2413	23.2833	0.975776	1.9667	2	20.9543	21.0247	20.9895	0.677526	1.59939	1.22965	HJV IDD PBS
30	2	24.5195	24.4956	24.5076	-0.248537	0.84175	2	22.3962	22.1562	22.2762	-0.609204	0.655558	1.28402	HJV IDD Hep
31	2	23.9646	23.9753	23.9699	0.289108	1.22188	2	21.914	21.9796	21.9468	-0.279783	0.823715	1.48338	HJV IDD Hep
32	2	25.2386	25.2632	25.2509	-0.991871	0.502825	2	22.802	22.8235	22.8127	-1.14575	0.451954	1.11256	HJV IDD Hep
33	2	24.1151	24.2106	24.1628	0.0962032	1.06896	2	21.7341	21.8238	21.779	-0.111979	0.925318	1.15523	HJV IDD Hep
35	2	24.0887	24.2936	24.1911	0.0678933	1.04818	2	21.3566	21.3721	21.3643	0.302662	1.23342	0.849821	HJV IDD Hep
36	2	24.2614		24.2614	-0.00235812	0.998367	2	21.5771	21.614	21.5956	0.0714321	1.05076	0.950139	HJV IDD Hep
		37.3363		24.259				34.9227		21.6864
Fig 3.S3E
DMT1/RPL19	Efficiency target	Target Ct 1	Target Ct 2	Target Ct	Delta Ct target	Numerator	Efficiency refer.	Refer. Ct 1	Refer. Ct 2	Refer. Ct	Delta Ct refer.	Denominator	Fold Induction	DMT1/RPL19
15	2	27.1023	26.9746	27.0384	-0.253812	0.838677	2	21.8605	21.8495	21.855	-0.188054	0.877789	0.955443	WT ND PBS
16	2	26.4045	26.4441	26.4243	0.360317	1.28371	2	21.1052	21.1828	21.144	0.523034	1.43697	0.893341	WT ND PBS
17	2	27.4758	27.4138	27.4448	-0.660202	0.63279	2	21.8429	21.8086	21.8257	-0.158749	0.895802	0.706395	WT ND PBS
51	2	26.5092	26.5952	26.5522	0.232418	1.1748	2	21.573		21.573	0.0939703	1.0673	1.10072	WT ND PBS
52	2	27.0284	27.0835	27.056	-0.27135	0.828544	2	21.934		21.934	-0.267034	0.831027	0.997013	WT ND PBS
53	2	26.3485	26.0355	26.192	0.592629	1.50799	2	21.7869		21.7869	-0.119872	0.920269	1.63864	WT ND PBS
18	2	26.4762	26.5055	26.4908	0.293815	1.22588	2	21.7996	21.825	21.8123	-0.145281	0.904203	1.35575	WT ND Hep
19	2	27.6748	27.6446	27.6597	-0.875057	0.545232	2	21.7798	21.7747	21.7772	-0.11025	0.926427	0.588532	WT ND Hep
20	2	26.3101	26.2961	26.3031	0.481551	1.39624	2	21.4218	21.4056	21.4137	0.253293	1.19192	1.17142	WT ND Hep
21	2	26.9799	27.0285	27.0042	-0.219574	0.858819	2	21.5875	21.6636	21.6256	0.0414152	1.02912	0.834516	WT ND Hep
22	2	26.9738	26.9406	26.9572	-0.172572	0.88726	2	21.9453	21.9395	21.9424	-0.275454	0.826191	1.07392	WT ND Hep
55	2	26.8739	26.9413	26.9076	-0.122981	0.918288	2	22.1155		22.1155	-0.448527	0.73279	1.25314	WT ND Hep
38	2	27.6635	27.7521	27.7078	-0.923203	0.527337	2	21.75	21.8793	21.8146	-0.147631	0.902732	0.584157	WT CID PBS
39	2	27.9734	27.9778	27.9756	-1.19097	0.438008	2	22.2751	22.2325	22.2538	-0.586782	0.665826	0.657841	WT CID PBS
40	2	27.7447	27.7409	27.7428	-0.958201	0.514698	2	21.9682	22.0892	22.0287	-0.36172	0.778236	0.661365	WT CID PBS
41	2	26.9813	26.9377	26.9595	-0.174872	0.885846	2	21.0493		21.0493	0.617642	1.53437	0.577337	WT CID PBS
42	2	27.9282	27.6028	27.7655	-0.980892	0.506666	2	21.8767		21.8767	-0.209664	0.864738	0.585919	WT CID PBS
43	2	27.3164	27.2402	27.2783	-0.493686	0.710208	2	21.5708		21.5708	0.0962343	1.06898	0.664379	WT CID PBS
44	2	27.6595	27.7356	27.6975	-0.912904	0.531115	2	22.4563		22.4563	-0.789359	0.578601	0.917929	WT CID Hep
45	2	26.9392	26.8089	26.8741	-0.0894438	0.939885	2	21.5052		21.5052	0.161801	1.11868	0.840171	WT CID Hep
46	2	28.0604	28.1087	28.0845	-1.29989	0.406157	2	22.4655		22.4655	-0.798505	0.574945	0.706428	WT CID Hep
47	2	26.5375	26.9307	28.1087	-1.32405	0.399411	2	21.3697		21.3697	0.297242	1.22879	0.325043	WT CID Hep
48	2	26.3635	26.456	26.4097	0.374913	1.29676	2	21.0876		21.0876	0.579431	1.49426	0.867829	WT CID Hep
49	2	27.9867	27.9254	27.956	-1.1714	0.443989	2	22.2658		22.2658	-0.598807	0.6603	0.672405	WT CID Hep
1	2	27.8752	27.9744	27.9248	-1.14017	0.453705	2	21.4865	21.4382	21.4624	0.204612	1.15238	0.393712	HJV ND PBS
2	2	27.212	27.8577	27.5348	-0.750209	0.594517	2	21.767	21.7378	21.7524	-0.085371	0.942542	0.630759	HJV ND PBS
3	2	28.2705	28.099	28.1848	-1.40013	0.378895	2	21.9982	21.962	21.9801	-0.313145	0.804885	0.470744	HJV ND PBS
9	2	27.8972	27.95	27.9236	-1.13896	0.454087	2	21.6705	21.7174	21.694	-0.0269823	0.981471	0.462659	HJV ND PBS
10	2	27.4489	27.2973	27.3731	-0.588482	0.665042	2	21.5508	21.4559	21.5033	0.163668	1.12013	0.593718	HJV ND PBS
11	2	27.8084	27.7891	27.7988	-1.01414	0.495123	2	21.7028	21.7149	21.7088	-0.0418577	0.971403	0.509699	HJV ND PBS
4	2	27.3582	27.7451	27.5516	-0.767019	0.58763	2	21.9796	21.9733	21.9765	-0.30951	0.806916	0.728243	HJV ND Hep
5	2	27.0371	27.1505	27.0938	-0.309149	0.807117	2	21.4667	21.5476	21.5072	0.159827	1.11715	0.722477	HJV ND Hep
6	2	27.5253	27.6151	27.5702	-0.78556	0.580127	2	23.3779	23.3851	23.3815	-1.71452	0.304703	1.90391	HJV ND Hep
7	2	27.3823	27.1701	27.2762	-0.49161	0.711231	2	21.8592	21.7724	21.8158	-0.14882	0.901988	0.788515	HJV ND Hep
8	2	27.1777	27.1684	27.1731	-0.388426	0.763963	2	21.5471	21.4945	21.5208	0.146176	1.10663	0.690349	HJV ND Hep
13	2	26.9775	27.0872	27.0323	-0.24769	0.842244	2	21.3796	21.3391	21.3593	0.30764	1.23768	0.680501	HJV ND Hep
23	2	27.354	27.4214	27.3877	-0.6031	0.658338	2	21.5508	21.5397	21.5453	0.121725	1.08804	0.60507	HJV IDD PBS
24	2	27.3118	27.4233	27.3676	-0.582932	0.667606	2	21.8121	21.7867	21.7994	-0.132421	0.9123	0.731783	HJV IDD PBS
25	2	26.7226	26.7042	26.7134	0.0712207	1.05061	2	21.4291	21.6935	21.5613	0.105678	1.076	0.976399	HJV IDD PBS
26	2	27.7923	27.7327	27.7625	-0.977864	0.507731	2	22.5388	22.5211	22.53	-0.862963	0.549822	0.923446	HJV IDD PBS
27	2	27.0271	26.8842	26.9556	-0.170987	0.888235	2	21.5911	21.567	21.5791	0.0879106	1.06283	0.835726	HJV IDD PBS
28	2	26.2801	26.4244	26.3523	0.432367	1.34945	2	20.9543	21.0247	20.9895	0.677526	1.59939	0.843723	HJV IDD PBS
30	2	27.6683	27.5576	27.613	-0.828343	0.563176	2	22.3962	22.1562	22.2762	-0.609204	0.655558	0.859078	HJV IDD Hep
31	2	26.9169	26.9403	26.9286	-0.143976	0.905022	2	21.914	21.9796	21.9468	-0.279783	0.823715	1.09871	HJV IDD Hep
32	2	28.1243	28.605	28.3647	-1.58003	0.334475	2	22.802	22.8235	22.8127	-1.14575	0.451954	0.740064	HJV IDD Hep
33	2	26.8905	26.9592	26.9249	-0.140255	0.907359	2	21.7341	21.8238	21.779	-0.111979	0.925318	0.980592	HJV IDD Hep
35	2	26.6091	26.7086	26.6589	0.125758	1.09108	2	21.3566	21.3721	21.3643	0.302662	1.23342	0.884599	HJV IDD Hep
36	2	27.028		27.028	-0.243352	0.84478	2	21.5771	21.614	21.5956	0.0714321	1.05076	0.803972	HJV IDD Hep
		36.7084		26.7846				34.9227		21.6864
Fig. 3.S3G
LCN2/RPL19	Efficiency target	Target Ct 1	Target Ct 2	Target Ct	Delta Ct target	Numerator	Efficiency refer.	Refer. Ct 1	Refer. Ct 2	Refer. Ct	Delta Ct refer.	Denominator	Fold Induction	LCN2/RPL19
15	2				26.1342	7.36525e+07	2	21.8605	21.8495	21.855	-0.188054	0.877789		WT ND PBS
16	2	24.9036	24.6644	24.784	1.35019	2.54946	2	21.1052	21.1828	21.144	0.523034	1.43697	1.77419	WT ND PBS
17	2	26.4316	26.4791	26.4553	-0.321092	0.800464	2	21.8429	21.8086	21.8257	-0.158749	0.895802	0.893572	WT ND PBS
51	2	26.5102	26.5311	26.5207	-0.38643	0.76502	2	21.573		21.573	0.0939703	1.0673	0.716779	WT ND PBS
52	2	26.9042	26.8828	26.8935	-0.759293	0.590786	2	21.934		21.934	-0.267034	0.831027	0.710911	WT ND PBS
53	2	25.9516	26.0836	26.0176	0.116623	1.08419	2	21.7869		21.7869	-0.119872	0.920269	1.17813	WT ND PBS
18	2	19.3818	19.3848	19.3833	6.75089	107.701	2	21.7996	21.825	21.8123	-0.145281	0.904203		WT ND Hep
19	2	26.2629	26.1159	26.1894	-0.0551752	0.962478	2	21.7798	21.7747	21.7772	-0.11025	0.926427	1.03891	WT ND Hep
20	2	18.9434	18.8347	18.8891	7.24518	151.711	2	21.4218	21.4056	21.4137	0.253293	1.19192		WT ND Hep
21	2	24.6498	24.5479	24.5989	1.53537	2.89863	2	21.5875	21.6636	21.6256	0.0414152	1.02912	2.81661	WT ND Hep
22	2	22.8038	22.8443	22.824	3.31019	9.91894	2	21.9453	21.9395	21.9424	-0.275454	0.826191	12.0056	WT ND Hep
55	2	26.492	26.4112	26.4516	-0.31736	0.802537	2	22.1155		22.1155	-0.448527	0.73279	1.09518	WT ND Hep
38	2	24.2539	24.3916	24.3227	1.81151	3.51011	2	21.75	21.8793	21.8146	-0.147631	0.902732	3.88832	WT CID PBS
39	2	25.8857	25.7013	25.7935	0.340743	1.26641	2	22.2751	22.2325	22.2538	-0.586782	0.665826	1.90201	WT CID PBS
40	2	24.3937	24.5481	24.4709	1.66333	3.16746	2	21.9682	22.0892	22.0287	-0.36172	0.778236	4.07005	WT CID PBS
41	2	25.2624	25.0901	25.1762	0.958014	1.94263	2	21.0493		21.0493	0.617642	1.53437	1.26608	WT CID PBS
42	2	26.3994	26.3524	26.3759	-0.241711	0.845742	2	21.8767		21.8767	-0.209664	0.864738	0.978032	WT CID PBS
43	2	24.1178	24.0702	24.094	2.0402	4.11303	2	21.5708		21.5708	0.0962343	1.06898	3.84762	WT CID PBS
44	2	26.2562	26.207	26.2316	-0.0974096	0.93471	2	22.4563		22.4563	-0.789359	0.578601	1.61546	WT CID Hep
45	2	22.9427	22.9357	22.9392	3.19505	9.1581	2	21.5052		21.5052	0.161801	1.11868	8.1865	WT CID Hep
46	2	26.1397	26.8099	26.4748	-0.340526	0.789753	2	22.4655		22.4655	-0.798505	0.574945	1.37362	WT CID Hep
47	2	26.6996	26.1195	26.4095	-0.275308	0.826274	2	21.3697		21.3697	0.297242	1.22879	0.672427	WT CID Hep
48	2	24.552	24.7626	24.6573	1.47692	2.78354	2	21.0876		21.0876	0.579431	1.49426	1.86282	WT CID Hep
49	2	27.771	27.481	27.626	-1.49177	0.355576	2	22.2658		22.2658	-0.598807	0.6603	0.538507	WT CID Hep
1	2	24.9976	24.8466	24.9221	1.21209	2.31674	2	21.4865	21.4382	21.4624	0.204612	1.15238	2.0104	HJV ND PBS
2	2	23.272	23.2282	23.2501	2.88411	7.38252	2	21.767	21.7378	21.7524	-0.085371	0.942542	7.83256	HJV ND PBS
3	2	24.1309	25.1706	24.6508	1.48347	2.79621	2	21.9982	21.962	21.9801	-0.313145	0.804885	3.47404	HJV ND PBS
9	2	27.6678	26.8647	27.2662	-1.13201	0.456281	2	21.6705	21.7174	21.694	-0.0269823	0.981471	0.464895	HJV ND PBS
10	2	23.9839	23.9601	23.972	2.16226	4.47617	2	21.5508	21.4559	21.5033	0.163668	1.12013	3.99611	HJV ND PBS
11	2	25.0536	24.9208	24.9872	1.14703	2.21458	2	21.7028	21.7149	21.7088	-0.0418577	0.971403	2.27977	HJV ND PBS
4	2	25.0206	24.8106	24.9156	1.21863	2.32725	2	21.9796	21.9733	21.9765	-0.30951	0.806916	2.88413	HJV ND Hep
5	2	22.1517	22.1221	22.1369	3.99732	15.9703	2	21.4667	21.5476	21.5072	0.159827	1.11715	14.2955	HJV ND Hep
6	2	25.9419	26.0966	26.0193	0.11496	1.08295	2	23.3779	23.3851	23.3815	-1.71452	0.304703	3.5541	HJV ND Hep
7	2	23.7649	23.7275	23.7462	2.38806	5.23452	2	21.8592	21.7724	21.8158	-0.14882	0.901988	5.80332	HJV ND Hep
8	2	23.9827	23.7693	23.876	2.25823	4.78403	2	21.5471	21.4945	21.5208	0.146176	1.10663	4.32306	HJV ND Hep
13	2	24.521	24.5448	24.5329	1.60132	3.0342	2	21.3796	21.3391	21.3593	0.30764	1.23768	2.45152	HJV ND Hep
23	2	25.0184	24.9977	25.0081	1.12618	2.1828	2	21.5508	21.5397	21.5453	0.121725	1.08804	2.00618	HJV IDD PBS
24	2	23.1243	23.0581	23.0912	3.04305	8.24231	2	21.8121	21.7867	21.7994	-0.132421	0.9123	9.03465	HJV IDD PBS
25	2	26.9447	27.03	26.9873	-0.853117	0.553587	2	21.4291	21.6935	21.5613	0.105678	1.076	0.514486	HJV IDD PBS
26	2	27.0708	26.6294	26.8501	-0.715852	0.608845	2	22.5388	22.5211	22.53	-0.862963	0.549822	1.10735	HJV IDD PBS
27	2	24.9008	24.7758	24.8383	1.29589	2.45528	2	21.5911	21.567	21.5791	0.0879106	1.06283	2.31014	HJV IDD PBS
28	2	22.2799	22.2274	22.2536	3.8806	14.7291	2	20.9543	21.0247	20.9895	0.677526	1.59939	9.20919	HJV IDD PBS
30	2	25.032	25.0255	25.0287	1.10548	2.15171	2	22.3962	22.1562	22.2762	-0.609204	0.655558	3.28226	HJV IDD Hep
31	2	23.8544	23.8772	23.8658	2.26841	4.8179	2	21.914	21.9796	21.9468	-0.279783	0.823715	5.849	HJV IDD Hep
32	2	26.2251	26.1089	26.167	-0.03276	0.977548	2	22.802	22.8235	22.8127	-1.14575	0.451954	2.16294	HJV IDD Hep
33	2	23.821	23.7091	23.7651	2.36917	5.16642	2	21.7341	21.8238	21.779	-0.111979	0.925318	5.58341	HJV IDD Hep
35	2	24.9476	25.1442	25.0459	1.08829	2.12622	2	21.3566	21.3721	21.3643	0.302662	1.23342	1.72384	HJV IDD Hep
36	2	25.6232		25.6232	0.511021	1.42506	2	21.5771	21.614	21.5956	0.0714321	1.05076	1.35622	HJV IDD Hep
		37.3363		26.1342				34.9227		21.6864
Fig . 3.S3B
SOCS3/RPL19	Efficiency target	Target Ct 1	Target Ct 2	Target Ct	Delta Ct target	Numerator	Efficiency refer.	Refer. Ct 1	Refer. Ct 2	Refer. Ct	Delta Ct refer.	Denominator	Fold Induction	SOCS3/RPL19
15	2	27.1825	27.3832	27.2829	0.970745	1.95985	2	21.8177	21.7822	21.7999	0.0765031	1.05446	1.85863	WT ND PBS
16	2	28.2159	28.3491	28.2825	-0.0288951	0.980171	2	21.5105	21.4343	21.4724	0.404019	1.32319	0.740764	WT ND PBS
17	2	27.9425	28.3167	28.1296	0.12399	1.08974	2	22.1542	22.1614	22.1578	-0.281402	0.822791	1.32445	WT ND PBS
51	2	28.3006	28.5726	28.4366	-0.182996	0.880872	2	21.3051	21.5285	21.4168	0.459605	1.37516	0.640557	WT ND PBS
52	2	29.2431	28.9869	29.115	-0.861427	0.550408	2	22.1614	22.0162	22.0888	-0.21235	0.86313	0.637688	WT ND PBS
53	2	27.9533	28.5967	28.275	-0.0214173	0.985264	2	22.3158	22.3298	22.3228	-0.446375	0.733885	1.34253	WT ND PBS
18	2	28.4201	29.1946	28.8074	-0.55376	0.681242	2	21.6476	21.9779	21.8127	0.0637048	1.04515	0.651815	WT ND Hep
19	2	28.312	28.1804	28.2462	0.00738366	1.00513	2	21.7073	21.7069	21.7071	0.169339	1.12454	0.893813	WT ND Hep
20	2	27.2091	28.4523	27.8307	0.422925	1.34064	2	21.9076	21.7956	21.8516	0.0247978	1.01734	1.3178	WT ND Hep
21	2	28.4664	28.3829	28.4247	-0.171078	0.888179	2	20.7022	20.7199	20.7111	1.16538	2.24292	0.395993	WT ND Hep
22	2	29.2427	29.7106	29.4766	-1.22305	0.428377	2	21.0671	21.623	21.345	0.531398	1.44533	0.296387	WT ND Hep
55	2	29.9298	30.2985	30.1141	-1.86052	0.275378	2	21.9434	21.9735	21.9585	-0.0820147	0.944737	0.291486	WT ND Hep
38	2	31.1404	31.5214	31.3309	-3.0773	0.118479	2	22.0392	22.09	22.0646	-0.188162	0.877724	0.134984	WT CID PBS
39	2	31.1556	31.2862	31.2209	-2.96731	0.127865	2	22.9485	22.9482	22.9483	-1.0719	0.475692	0.268797	WT CID PBS
40	2	29.9326	30.099	30.0158	-1.76218	0.294803	2	22.5307	22.5299	22.5303	-0.653871	0.635573	0.463838	WT CID PBS
41	2	29.6315	29.6738	29.6526	-1.39902	0.379185	2	21.8454	21.7944	21.8199	0.0565341	1.03996	0.364614	WT CID PBS
42	2	30.7248	31.2071	30.9659	-2.71235	0.152581	2	22.5059	22.618	22.5619	-0.6855	0.62179	0.24539	WT CID PBS
43	2	30.835	31.2572	31.0461	-2.7925	0.144335	2	22.005	21.9969	22.0009	-0.124495	0.917325	0.157344	WT CID PBS
44	2	31.2856	31.0898	31.1877	-2.93409	0.130843	2	22.2768	22.2569	22.2668	-0.390412	0.762912	0.171504	WT CID Hep
45	2	30.5009	30.307	30.404	-2.15036	0.225257	2	21.7106	21.7385	21.7246	0.151866	1.11101	0.202751	WT CID Hep
46	2	31.1476	32.2458	31.6967	-3.4431	0.0919442	2	22.5571	22.5547	22.5559	-0.679504	0.62438	0.147257	WT CID Hep
47	2	30.0146	30.7913	30.403	-2.14937	0.225411	2	21.4454	21.4492	21.4473	0.429138	1.34643	0.167414	WT CID Hep
48	2	29.9561	31.0701	30.5131	-2.25947	0.208849	2	21.2215	21.1466	21.184	0.692397	1.61597	0.129241	WT CID Hep
49	2	30.7635	31.6719	31.2177	-2.96408	0.128151	2	22.6693	22.5479	22.6086	-0.732156	0.602003	0.212875	WT CID Hep
1	2	28.9336	28.715	28.8243	-0.570676	0.673301	2	22.1729	22.1485	22.1607	-0.284236	0.821177	0.819922	HJV ND PBS
2	2	29.9531	29.5997	29.7764	-1.52279	0.348011	2	22.4031	22.4141	22.4086	-0.532143	0.691527	0.503251	HJV ND PBS
3	2	31.0895	30.4908	30.7901	-2.53655	0.172354	2	22.0004	22.0502	22.0253	-0.148825	0.901985	0.191083	HJV ND PBS
9	2	31.3872	30.5262	30.9567	-2.70307	0.153566	2	22.2976	22.3532	22.3254	-0.448956	0.732573	0.209625	HJV ND PBS
10	2	30.7039	30.6551	30.6795	-2.42591	0.186093	2	21.8815	21.9381	21.9098	-0.033364	0.977139	0.190446	HJV ND PBS
11	2	30.6697	30.5172	30.5935	-2.33988	0.197527	2	21.8975	21.9455	21.9215	-0.0450703	0.969243	0.203796	HJV ND PBS
4	2	30.1194	29.4971	29.8082	-1.55465	0.340411	2	21.427	21.3291	21.378	0.498391	1.41264	0.240975	HJV ND Hep
5	2	27.7706	27.1523	27.4615	0.792143	1.73164	2	21.0879	20.968	21.028	0.84848	1.8006	0.961703	HJV ND Hep
6	2	28.5989	28.1935	28.3962	-0.142607	0.90588	2	23.7058	23.8066	23.7562	-1.87976	0.271729	3.33377	HJV ND Hep
7	2	29.4494	29.3422	29.3958	-1.14219	0.453071	2	21.7859	21.9292	21.8576	0.0188859	1.01318	0.447179	HJV ND Hep
8	2	30.5613	29.5944	30.0779	-1.82426	0.282386	2	22.5043	22.4365	22.4704	-0.593969	0.662518	0.426232	HJV ND Hep
13	2	30.1158	30.3583	30.2371	-1.98348	0.25288	2	21.1408	21.2894	21.2151	0.661372	1.58159	0.15989	HJV ND Hep
23	2	30.7337	29.8386	30.2861	-2.03254	0.244425	2	21.6152	21.5932	21.6042	0.272267	1.2077	0.202388	HJV IDD PBS
24	2	30.3043	29.8769	30.0906	-1.83702	0.2799	2	21.8254	21.7478	21.7866	0.0898298	1.06424	0.263004	HJV IDD PBS
25	2	31.8019	31.6047	31.7033	-3.44973	0.0915223	2	22.22	22.2287	22.2244	-0.347924	0.785714	0.116483	HJV IDD PBS
26	2	31.3583	30.79	31.0742	-2.82058	0.141554	2	23.0264	22.9629	22.9946	-1.11821	0.460665	0.307281	HJV IDD PBS
27	2	27.8557	27.9959	27.9258	0.327827	1.25512	2	22.2003	22.3089	22.2546	-0.378164	0.769416	1.63126	HJV IDD PBS
28	2	28.2651	28.2018	28.2334	0.0201467	1.01406	2	21.3326	21.2118	21.2722	0.604236	1.52017	0.66707	HJV IDD PBS
30	2	30.1556	29.6715	29.9136	-1.65997	0.316446	2	23.6261	23.5748	23.6005	-1.72401	0.302705	1.04539	HJV IDD Hep
31	2	29.7365	28.6685	29.2025	-0.948905	0.518026	2	22.1835	22.2086	22.1961	-0.319614	0.801284	0.646494	HJV IDD Hep
32	2	29.8558	28.9026	29.3792	-1.12561	0.458309	2	22.6542	22.6575	22.6558	-0.779401	0.582608	0.78665	HJV IDD Hep
33	2	29.4369	28.4513	28.9441	-0.690499	0.619639	2	22.1666	22.2339	22.2002	-0.32378	0.798974	0.775544	HJV IDD Hep
35	2	30.7737	29.9934	30.3835	-2.12994	0.228467	2	21.9365	21.9183	21.9274	-0.0509774	0.965282	0.236684	HJV IDD Hep
36	2	29.5481		29.5481	-1.29448	0.407683	2	21.846		21.846	0.0304406	1.02132	0.399171	HJV IDD Hep
		36.2159		28.2536				36.7582		21.8764
