# Supplementary material for: A crosstalk between hepcidin and IRE/IRP pathways controls ferroportin expression and determines serum iron levels in mice
Source: eLife. 2022 Sep 6;11:e81332. doi: 10.7554/eLife.81332 (PMC9499557; doi:10.7554/eLife.81332)
Supplement: Figure 4—source data 1. [file elife-81332-fig4-data1.xlsx]

## Sheet: 809
809	Liver	Fig 3.F
Hep/RPL 19	Efficiency target	Target Ct 1	Target Ct 2	Target Ct	Delta Ct target	Numerator	Efficiency refer.	Refer. Ct 1	Refer. Ct 2	Refer. Ct	Delta Ct refer.	Denominator	Fold Induction	Hep/RPL 19
15	2	18.2741	18.314	18.2941	0.0932659	1.06678	2	21.8605	21.8495	21.855	-0.188054	0.877789	1.21531	WT ND PBS
16	2	18.3087	18.1738	18.2412	0.146075	1.10655	2	21.1052	21.1828	21.144	0.523034	1.43697	0.770059	WT ND PBS
17	2	18.3737	18.2697	18.3217	0.0656122	1.04653	2	21.8429	21.8086	21.8257	-0.158749	0.895802	1.16826	WT ND PBS
51	2	18.1818		18.1818	0.205563	1.15314	2	21.573		21.573	0.0939703	1.0673	1.08042	WT ND PBS
52	2	18.63		18.63	-0.242666	0.845182	2	21.934		21.934	-0.267034	0.831027	1.01703	WT ND PBS
53	2	19.1108		19.1108	-0.723457	0.605644	2	21.7869		21.7869	-0.119872	0.920269	0.658117	WT ND PBS
54	2	17.9317		17.9317	0.455607	1.37136	2	21.5503		21.5503	0.116704	1.08425	1.26479	WT ND PBS
18	2	21.4187	21.4871	21.4529	-3.06554	0.119449	2	21.7996	21.825	21.8123	-0.145281	0.904203	0.132104	WT ND Hep
19	2	22.5554	22.5179	22.5367	-4.14935	0.0563534	2	21.7798	21.7747	21.7772	-0.11025	0.926427	0.0608287	WT ND Hep
20	2	22.0994	21.9974	22.0484	-3.6611	0.0790498	2	21.4218	21.4056	21.4137	0.253293	1.19192	0.0663211	WT ND Hep
21	2	21.7733	21.7329	21.7531	-3.36581	0.0970044	2	21.5875	21.6636	21.6256	0.0414152	1.02912	0.0942593	WT ND Hep
22	2	22.3844	22.3971	22.3907	-4.00343	0.0623517	2	21.9453	21.9395	21.9424	-0.275454	0.826191	0.075469	WT ND Hep
55	2	22.1253		22.1253	-3.73797	0.0749479	2	22.1155		22.1155	-0.448527	0.73279	0.102277	WT ND Hep
56	2	22.2557		22.2557	-3.8684	0.0684694	2	21.6493		21.6493	0.0176649	1.01232	0.0676362	WT ND Hep
57	2	23.0121		23.0121	-4.62481	0.0405316	2	22.3593		22.3593	-0.692271	0.618879	0.065492	WT ND Hep
38	2	16.9176	16.8845	16.9011	1.48626	2.80161	2	21.75	21.8793	21.8146	-0.147631	0.902732	3.10348	WT CID PBS
39	2	17.1484	17.1918	17.1701	1.2172	2.32495	2	22.2751	22.2325	22.2538	-0.586782	0.665826	3.49183	WT CID PBS
40	2	16.9352	16.9464	16.9408	1.44653	2.72551	2	21.9682	22.0892	22.0287	-0.36172	0.778236	3.50216	WT CID PBS
41	2	16.2949		16.2949	2.09246	4.26474	2	21.0493		21.0493	0.617642	1.53437	2.77948	WT CID PBS
42	2	16.8768		16.8768	1.51048	2.84905	2	21.8767		21.8767	-0.209664	0.864738	3.2947	WT CID PBS
43	2	16.6391		16.6391	1.74825	3.3595	2	21.5708		21.5708	0.0962343	1.06898	3.14272	WT CID PBS
44	2	17.2088		17.2088	1.17848	2.26338	2	22.4563		22.4563	-0.789359	0.578601	3.91181	WT CID Hep
45	2	16.4799		16.4799	1.90744	3.75143	2	21.5052		21.5052	0.161801	1.11868	3.35343	WT CID Hep
46	2	17.6866		17.6866	0.700737	1.62534	2	22.4655		22.4655	-0.798505	0.574945	2.82694	WT CID Hep
47	2	16.5906		16.5906	1.79676	3.4744	2	21.3697		21.3697	0.297242	1.22879	2.82749	WT CID Hep
48	2	16.1761		16.1761	2.21118	4.63053	2	21.0876		21.0876	0.579431	1.49426	3.09888	WT CID Hep
49	2	17.5087		17.5087	0.878582	1.83857	2	22.2658		22.2658	-0.598807	0.6603	2.78444	WT CID Hep
50	2	16.9085		16.9085	1.47883	2.78722	2	21.9429		21.9429	-0.275882	0.825945	3.37458	WT CID Hep
1	2	19.3329	19.3111	19.322	-0.934681	0.523158	2	21.4865	21.4382	21.4624	0.204612	1.15238	0.453982	HJV ND PBS
2	2	20.1658	20.0749	20.1203	-1.73302	0.300822	2	21.767	21.7378	21.7524	-0.085371	0.942542	0.31916	HJV ND PBS
3	2	19.5952	19.5063	19.5507	-1.1634	0.44646	2	21.9982	21.962	21.9801	-0.313145	0.804885	0.554688	HJV ND PBS
9	2	21.1376	21.053	21.0953	-2.708	0.153042	2	21.6705	21.7174	21.694	-0.0269823	0.981471	0.155931	HJV ND PBS
10	2	19.0665	18.9324	18.9995	-0.612128	0.654231	2	21.5508	21.4559	21.5033	0.163668	1.12013	0.584066	HJV ND PBS
11	2	21.9832	22.0332	22.0082	-3.6209	0.0812834	2	21.7028	21.7149	21.7088	-0.0418577	0.971403	0.0836762	HJV ND PBS
12	2	19.7622	19.7335	19.7479	-1.36053	0.389439	2	21.4892	21.4862	21.4877	0.179269	1.13231	0.343933	HJV ND PBS
4	2	19.923	19.9731	19.9481	-1.56075	0.338975	2	21.9796	21.9733	21.9765	-0.30951	0.806916	0.420088	HJV ND Hep
5	2	17.9876	18.0819	18.0348	0.352535	1.2768	2	21.4667	21.5476	21.5072	0.159827	1.11715	1.14291	HJV ND Hep
6	2	21.3169	21.2981	21.3075	-2.92017	0.132112	2	23.3779	23.3851	23.3815	-1.71452	0.304703	0.433575	HJV ND Hep
7	2	18.9288	18.7705	18.8497	-0.462331	0.725812	2	21.8592	21.7724	21.8158	-0.14882	0.901988	0.804681	HJV ND Hep
8	2	18.5409	18.4842	18.5125	-0.125219	0.916865	2	21.5471	21.4945	21.5208	0.146176	1.10663	0.828518	HJV ND Hep
13	2	19.4295	19.2927	19.3611	-0.973776	0.509172	2	21.3796	21.3391	21.3593	0.30764	1.23768	0.411391	HJV ND Hep
14	2	19.7408	19.8195	19.7802	-1.39286	0.380808	2	22.1316	22.0371	22.0843	-0.417356	0.748795	0.508561	HJV ND Hep
23	2	28.5373	28.4089	28.4731	-10.0858	0.000920189	2	21.5508	21.5397	21.5453	0.121725	1.08804	0.000845735	HJV IDD PBS
24	2	29.6225	29.2504	29.4364	-11.0491	0.000471935	2	21.8121	21.7867	21.7994	-0.132421	0.9123	0.000517303	HJV IDD PBS
25	2	32.8536	32.2447	32.5492	-14.1618	5.45585e-05	2	21.4291	21.6935	21.5613	0.105678	1.076	5.0705e-05	HJV IDD PBS
26	2	31.8307	32.5295	32.1801	-13.7928	7.0463e-05	2	22.5388	22.5211	22.53	-0.862963	0.549822	0.000128156	HJV IDD PBS
27	2	30.356	30.3347	30.3453	-11.958	0.000251352	2	21.5911	21.567	21.5791	0.0879107	1.06283	0.000236493	HJV IDD PBS
28	2	27.7523	27.7009	27.7266	-9.33926	0.00154384	2	20.9543	21.0247	20.9895	0.677526	1.59939	0.000965264	HJV IDD PBS
29	2	31.6358	31.7753	31.7055	-13.3182	9.79074e-05	2	22.639	22.5504	22.5947	-0.927726	0.525686	0.000186247	HJV IDD PBS
30	2	30.7491	30.8284	30.7888	-12.4014	0.00018484	2	22.3962	22.1562	22.2762	-0.609204	0.655558	0.000281958	HJV IDD Hep
31	2	30.5999	30.4746	30.5373	-12.15	0.000220036	2	21.914	21.9796	21.9468	-0.279783	0.823715	0.000267127	HJV IDD Hep
32	2	31.2848	31.4455	31.3652	-12.9778	0.000123959	2	22.802	22.8235	22.8127	-1.14575	0.451954	0.000274274	HJV IDD Hep
33	2	30.5755	30.5553	30.5654	-12.1781	0.000215795	2	21.7341	21.8238	21.779	-0.111979	0.925318	0.000233212	HJV IDD Hep
35	2	28.1828	28.2321	28.2074	-9.82012	0.00110624	2	21.3566	21.3721	21.3643	0.302662	1.23342	0.00089689	HJV IDD Hep
36	2	29.8303	29.8356	29.833	-11.4457	0.00035852	2	21.5771	21.614	21.5956	0.0714321	1.05076	0.000341201	HJV IDD Hep
37	2	30.6824	30.727	30.7047	-12.3174	0.000195931	2	22.1392	22.1082	22.1237	-0.456699	0.728651	0.000268896	HJV IDD Hep
		34.297		18.3873				34.9227		21.667
