# Supplementary material for: A crosstalk between hepcidin and IRE/IRP pathways controls ferroportin expression and determines serum iron levels in mice
Source: eLife. 2022 Sep 6;11:e81332. doi: 10.7554/eLife.81332 (PMC9499557; doi:10.7554/eLife.81332)
Supplement: Figure 4—source data 2. [file elife-81332-fig4-data2.xlsx]

## Sheet: 809 Liver
Sample #	Tissue Weight (mg)	Vol. Acid (ul)	OD 562nm Zeroed	Fe (ug/50uL) using adjusted Std Curve	weight of tissue assayed (g/50uL)	Fe (ug/g) liver	Genotype		Original Data	0.051	0.038	0.324	0.292	0.601	0.494	1.933	1.682	0.445	1.285
30	10.8	540	0.4005	0.279649	0.001	559.297	HJV IDD Hep			0.082	0.085	0.368	0.319	0.663	0.805	1.032	1.546	0.318	1.332
31	7.3	365	0.2735	0.187473	0.001	374.946	HJV IDD Hep			0.132	0.131	0.295	0.332	0.637	0.687	1.626	1.787	0.525	0.148
32	4.9	245	0.4805	0.337712	0.001	675.425	HJV IDD Hep			0.257	0.261	0.372	0.36	0.694	0.678	2.206	1.72	0.435	0.135
33	3.7	185	0.3905	0.272391	0.001	544.782	HJV IDD Hep			0.465	0.454	0.398	0.32	0.68	0.828	1.948	1.624	0.115
34	5.5	275	0.0705	0.0401364	0.001	80.2729	HJV IDD Hep			0.859	0.853	0.368	0.335	0.105		1.747	1.988	1.529	1.073
35	7.4	370	1.4845	1.06641	0.001	2132.82	HJV IDD Hep			1.98	1.959	0.391	0.29	0.716		1.768		0.837	0.732
36	6.2	310	0.7925	0.56416	0.001	1128.32	HJV IDD Hep			3.419	3.453	0.298		0.738		2.157		1.29	0.722
37	7.1	355	1.2455	0.892945	0.001	1785.89	HJV IDD Hep
23	7.3	365	1.2405	0.889316	0.001	1778.63	HJV IDD PBS			0.0445		Zeroed Table:											Curve
24	5.4	270	1.2875	0.923429	0.001	1846.86	HJV IDD PBS		0	0		0.2795	0.2475	0.5565	0.4495	1.8885	1.6375	0.4005	1.2405
25	4.4	220	0.1035	0.0640877	0.001	128.175	HJV IDD PBS		10	0.039		0.3235	0.2745	0.6185	0.7605	0.9875	1.5015	0.2735	1.2875
26	4.4	220	0.0905	0.0546523	0.001	109.305	HJV IDD PBS		20	0.087		0.2505	0.2875	0.5925	0.6425	1.5815	1.7425	0.4805	0.1035
27	4.2	210	1.0285	0.735448	0.001	1470.9	HJV IDD PBS		50	0.2145		0.3275	0.3155	0.6495	0.6335	2.1615	1.6755	0.3905	0.0905
28	9.3	465	0.6875	0.487952	0.001	975.904	HJV IDD PBS		100	0.415		0.3535	0.2755	0.6355	0.7835	1.9035	1.5795	0.0705
29	5.4	270	0.6775	0.480694	0.001	961.388	HJV IDD PBS		200	0.8115		0.3235	0.2905	0.0605		1.7025	1.9435	1.4845	1.0285
4	6.4	320	1.8885	1.35963	0.001	6798.16	HJV ND Hep		500	1.925		0.3465	0.2455	0.6715		1.7235		0.7925	0.6875
5	13.9	695	0.9875	0.70569	0.001	3528.45	HJV ND Hep		1000	3.3915		0.2535		0.6935		2.1125		1.2455	0.6775
6	4.5	225	1.5815	1.13681	0.001	5684.06	HJV ND Hep
7	6.3	315	2.1615	1.55777	0.001	7788.87	HJV ND Hep		Concentration ferric chloride (uM)	Concentration Ferric Chloride (mg/dL)	Concentration Ferric Chloride (ug/dL)	Concentration Ferric Chloride (ug/50 uL)	Ladder
8	5.8	290	1.9035	1.37052	0.001	6852.59	HJV ND Hep		0	0	0	0	0
13	3.5	175	1.7025	1.22463	0.001	6123.17	HJV ND Hep		10	0.05585	55.85	0.027925	0.039
14	5.8	290	1.7235	1.23988	0.001	6199.38	HJV ND Hep		20	0.1117	111.7	0.05585	0.087
1	4.2	210	2.1125	1.52221	0.001	7611.05	HJV ND PBS		50	0.27925	279.25	0.139625	0.2145
2	7.1	355	1.6375	1.17746	0.001	5887.28	HJV ND PBS		100	0.5585	558.5	0.27925	0.415
3	3.3	165	1.5015	1.07875	0.001	5393.74	HJV ND PBS		200	1.117	1117	0.5585	0.8115
9	6.2	310	1.7425	1.25367	0.001	6268.33	HJV ND PBS		500	2.7925	2792.5	1.39625	1.925
10	2.8	140	1.6755	1.20504	0.001	6025.19	HJV ND PBS		1000	5.585	5585	2.7925	3.3915
11	5.5	275	1.5795	1.13536	0.001	5676.8	HJV ND PBS
12	8.8	440	1.9435	1.39955	0.001	6997.75	HJV ND PBS
44	7.5	375	0.5565	0.392873	0.001	1964.36	WT CID Hep
45	8.1	405	0.6185	0.437872	0.001	2189.36	WT CID Hep
46	5	250	0.5925	0.419001	0.001	2095.01	WT CID Hep
47	4	200	0.6495	0.460372	0.001	2301.86	WT CID Hep
48	6.7	335	0.6355	0.45021	0.001	2251.05	WT CID Hep
49	2.6	130	0.0605	0.0328785	0.001	164.393	WT CID Hep
50	4.6	230	0.6715	0.476339	0.001	2381.7	WT CID Hep
38	9	450	0.6935	0.492307	0.001	2461.53	WT CID PBS
39	6.1	305	0.4495	0.315213	0.001	1576.06	WT CID PBS
40	7.5	375	0.7605	0.540935	0.001	2704.67	WT CID PBS
41	7.3	365	0.6425	0.455291	0.001	2276.46	WT CID PBS
42	7.4	370	0.6335	0.448759	0.001	2243.79	WT CID PBS
43	3.7	185	0.7835	0.557628	0.001	2788.14	WT CID PBS
18	8.2	410	0.2795	0.191828	0.001	191.828	WT ND Hep
19	3.2	160	0.3235	0.223763	0.001	223.763	WT ND Hep
20	4.8	240	0.2505	0.17078	0.001	170.78	WT ND Hep
21	4.7	235	0.3275	0.226666	0.001	226.666	WT ND Hep
22	3.1	155	0.3535	0.245536	0.001	245.536	WT ND Hep
55	6.6	330	0.3235	0.223763	0.001	223.763	WT ND Hep
56	9.2	460	0.3465	0.240456	0.001	240.456	WT ND Hep
57	6.9	345	0.2535	0.172957	0.001	172.957	WT ND Hep
15	3.5	175	0.2475	0.168602	0.001	168.602	WT ND PBS
16	4.2	210	0.2745	0.188199	0.001	188.199	WT ND PBS
17	4.3	215	0.2875	0.197634	0.001	197.634	WT ND PBS
51	6.2	310	0.3155	0.217956	0.001	217.956	WT ND PBS
52	6.7	335	0.2755	0.188924	0.001	188.924	WT ND PBS
53	7.4	370	0.2905	0.199811	0.001	199.811	WT ND PBS
54	5.3	265	0.2455	0.167151	0.001	167.151	WT ND PBS

## Sheet: 809 Spleen
Sample #	Tissue Weight (mg)	Vol. Acid (ul)	OD 562nm Zeroed	Fe (ug/50uL) using adjusted Std Curve	weight of tissue assayed (g/50uL)	Fe (ug/g) liver	Genotype		Original Data	0.041	0.04	0.137	0.226	0.339	0.106	0.127	0.943	0.186	0.412
15	2.5	125	0.3345	0.231036	0.001	1155.18	WT ND PBS			0.082	0.086	0.188	0.177	0.468	0.127	0.168	0.524	0.943	0.038
16	3.2	160	0.2815	0.192782	0.001	963.912	WT ND PBS			0.127	0.128	0.08	0.179	0.281	0.118	0.178	1.054	0.369
17	2.9	145	0.2985	0.205052	0.001	1025.26	WT ND PBS			0.256	0.262	0.203	0.316	0.334	0.161	0.141	0.553	0.163
51	2.9	145	0.3285	0.226705	0.001	1133.53	WT ND PBS			0.451	0.452	0.16	0.19	0.667	0.15	0.203	1.078	0.451
52	3.2	160	0.1225	0.0780224	0.001	390.112	WT ND PBS			0.846	0.848	0.193	0.214	0.442	0.137	1.157	1.258	0.161
53	4.9	245	0.4105	0.28589	0.001	1429.45	WT ND PBS			1.992	1.967	0.264	0.375	0.127	0.121	0.958	1.315	0.438
54	3.3	165	0.1205	0.0765789	0.001	382.894	WT ND PBS			3.407	3.412	0.2	0.322	0.193	0.178	1.092	1.293	0.418
18	5.7	285	0.4275	0.29816	0.001	1490.8	WT ND Hep
19	3.2	160	0.2405	0.16319	0.001	815.951	WT ND Hep			0.0405		Zeroed Table:											Curve
20	5.3	265	0.2935	0.201444	0.001	1007.22	WT ND Hep		0	0		0.0965	0.1855	0.2985	0.0655	0.0865	0.9025	0.1455	0.3715
21	1.4	70	0.6265	0.44179	0.001	2208.95	WT ND Hep		10	0.0435		0.1475	0.1365	0.4275	0.0865	0.1275	0.4835	0.9025
22	4.9	245	0.4015	0.279394	0.001	1396.97	WT ND Hep		20	0.087		0.0395	0.1385	0.2405	0.0775	0.1375	1.0135	0.3285
55	1.5	75	0.3975	0.276507	0.001	1382.53	WT ND Hep		50	0.2185		0.1625	0.2755	0.2935	0.1205	0.1005	0.5125	0.1225
56	4.6	230	0.3775	0.262071	0.001	1310.36	WT ND Hep		100	0.411		0.1195	0.1495	0.6265	0.1095	0.1625	1.0375	0.4105
57	5.1	255	0.3715	0.257741	0.001	1288.7	WT ND Hep		200	0.8065		0.1525	0.1735	0.4015	0.0965	1.1165	1.2175	0.1205
38	1.5	75	1.1165	0.795453	0.001	3977.26	WT CID PBS		500	1.939		0.2235	0.3345	0.0865	0.0805	0.9175	1.2745	0.3975
39	3.9	195	0.9175	0.651822	0.001	3259.11	WT CID PBS		1000	3.369		0.1595	0.2815	0.1525	0.1375	1.0515	1.2525	0.3775
40	1.6	80	1.0515	0.748538	0.001	3742.69	WT CID PBS
41	4.1	205	0.9025	0.640996	0.001	3204.98	WT CID PBS		Concentration ferric chloride (uM)	Concentration Ferric Chloride (mg/dL)	Concentration Ferric Chloride (ug/dL)	Concentration Ferric Chloride (ug/50 uL)	Ladder
42	2.7	135	0.4835	0.338578	0.001	1692.89	WT CID PBS		0	0	0	0	0
43	3.6	180	1.0135	0.721112	0.001	3605.56	WT CID PBS		10	0.05585	55.85	0.027925	0.0435
44	2.8	140	0.5125	0.359509	0.001	1797.55	WT CID Hep		20	0.1117	111.7	0.05585	0.087
45	2.9	145	1.0375	0.738434	0.001	3692.17	WT CID Hep		50	0.27925	279.25	0.139625	0.2185
46	2.6	130	1.2175	0.868351	0.001	4341.75	WT CID Hep		100	0.5585	558.5	0.27925	0.411
47	2	100	1.2745	0.909491	0.001	4547.46	WT CID Hep		200	1.117	1117	0.5585	0.8065
48	2.3	115	1.2525	0.893612	0.001	4468.06	WT CID Hep		500	2.7925	2792.5	1.39625	1.939
49	4.9	245	0.1455	0.0946229	0.001	473.114	WT CID Hep		1000	5.585	5585	2.7925	3.369
50	3.6	180	0.9025	0.640996	0.001	3204.98	WT CID Hep
1	3.8	190	0.0965	0.0592566	0.001	296.283	HJV ND PBS
2	4.3	215	0.1475	0.0960664	0.001	480.332	HJV ND PBS
3	3.9	195	0.0395	0.0181162	0.001	90.581	HJV ND PBS
9	4	200	0.1855	0.123493	0.001	617.467	HJV ND PBS
10	2.6	130	0.1365	0.088127	0.001	440.635	HJV ND PBS
11	3.9	195	0.1385	0.0895706	0.001	447.853	HJV ND PBS
12	4.3	215	0.2755	0.188452	0.001	942.259	HJV ND PBS
4	4.6	230	0.1625	0.106893	0.001	534.464	HJV ND Hep
5	2.9	145	0.1195	0.0758571	0.001	379.285	HJV ND Hep
6	3.4	170	0.1525	0.0996752	0.001	498.376	HJV ND Hep
7	3	150	0.2235	0.15092	0.001	754.601	HJV ND Hep
8	4.6	230	0.1595	0.104728	0.001	523.638	HJV ND Hep
13	5	250	0.1495	0.0975099	0.001	487.55	HJV ND Hep
14	2.8	140	0.1735	0.114832	0.001	574.161	HJV ND Hep
23	2.6	130	0.0865	0.052039	0.001	260.195	HJV IDD PBS
24	3	150	0.1525	0.0996752	0.001	498.376	HJV IDD PBS
25	3	150	0.0655	0.036882	0.001	184.41	HJV IDD PBS
26	3.5	175	0.0865	0.052039	0.001	260.195	HJV IDD PBS
27	3.4	170	0.0775	0.0455431	0.001	227.716	HJV IDD PBS
28	1.6	80	0.1205	0.0765789	0.001	382.894	HJV IDD PBS
29	2.1	105	0.1095	0.0686395	0.001	343.197	HJV IDD PBS
30	2.2	110	0.0965	0.0592566	0.001	296.283	HJV IDD Hep
31	2.7	135	0.0805	0.0477084	0.001	238.542	HJV IDD Hep
32	3.7	185	0.1375	0.0888488	0.001	444.244	HJV IDD Hep
33	3.3	165	0.0865	0.052039	0.001	260.195	HJV IDD Hep
34	3.1	155	0.1275	0.0816312	0.001	408.156	HJV IDD Hep
35	2.3	115	0.1375	0.0888488	0.001	444.244	HJV IDD Hep
36	2.5	125	0.1005	0.0621436	0.001	310.718	HJV IDD Hep
37	4	200	0.1625	0.106893	0.001	534.464	HJV IDD Hep
