# Supplementary material for: A crosstalk between hepcidin and IRE/IRP pathways controls ferroportin expression and determines serum iron levels in mice
Source: eLife. 2022 Sep 6;11:e81332. doi: 10.7554/eLife.81332 (PMC9499557; doi:10.7554/eLife.81332)
Supplement: Figure 4—source data 4. [file elife-81332-fig4-data4.xls]

## Sheet: Sheet2
Group	Diluted 5%	OD	Adjusted value
HJV IDD	4.77411	0.722	95.4822
HJV IDD	5.43174	0.669	108.635
HJV IDD	5.52346	0.662	110.469
HJV IDD	4.68005	0.73	93.601
HJV IDD	5.45782	0.667	109.156
HJV IDD	6.43867	0.597	128.773
HJV IDD	5.72418	0.647	114.484
HJV IDD Hep	4.49568	0.746	89.9137
HJV IDD Hep	5.015	0.702	100.3
HJV IDD Hep	4.49568	0.746	89.9137
HJV IDD Hep	3.7934	0.811	75.8681
HJV IDD Hep	3.84497	0.806	76.8994
HJV IDD Hep	5.65662	0.652	113.132
HJV IDD Hep	3.56103	0.834	71.2205
HJV ND	6.65268	0.583	133.054
HJV ND	6.40863	0.599	128.173
HJV ND	11.5767	0.356	231.534
HJV ND	5.65662	0.652	113.132
HJV ND	9.26105	0.443	185.221
HJV ND	7.33749	0.541	146.75
HJV ND	8.67564	0.47	173.513
HJV ND Hep	8.95133	0.457	179.027
HJV ND Hep	10.2309	0.403	204.617
HJV ND Hep	9.72899	0.423	194.58
HJV ND Hep	10.5504	0.391	211.008
HJV ND Hep	12.4157	0.331	248.314
HJV ND Hep	9.17113	0.447	183.423
HJV ND Hep	8.57246	0.475	171.449
WT CID		0.118	0	Value outside range
WT CID	39.1015	0.141	782.029
WT CID		0.125	0	Value outside range
WT CID	30.5676	0.151	611.352
WT CID	24.0621	0.173	481.242
WT CID		0.119	0	Value outside range
WT CID		0.131	0	Value outside range
WT CID Hep	36.3593	0.143	727.187
WT CID Hep	33.5956	0.146	671.913
WT CID Hep	34.4002	0.145	688.005
WT CID Hep	36.3593	0.143	727.187
WT CID Hep	34.4002	0.145	688.005
WT CID Hep	29.6501	0.153	593.001
WT CID Hep	16.5981	0.243	331.963
WT Hep	8.37059	0.485	167.412
WT Hep	6.39366	0.6	127.873
WT Hep	7.54627	0.529	150.925
WT Hep	7.51103	0.531	150.221
WT Hep	7.21855	0.548	144.371
Wt Hep	5.90298	0.634	118.06
Wt Hep	6.54485	0.59	130.897
Wt Hep	12.3801	0.332	247.603
WT ND	19.7707	0.204	395.413
WT ND	15.4575	0.262	309.149
WT ND	15.9745	0.253	319.489
WT ND	14.5266	0.28	290.532
WT ND	15.9745	0.253	319.489
WT ND	13.8363	0.295	276.726
WT ND	6.52958	0.591	130.592
