# Supplementary material for: A crosstalk between hepcidin and IRE/IRP pathways controls ferroportin expression and determines serum iron levels in mice
Source: eLife. 2022 Sep 6;11:e81332. doi: 10.7554/eLife.81332 (PMC9499557; doi:10.7554/eLife.81332)
Supplement: Figure 4—source data 5. [file elife-81332-fig4-data5.xlsx]

## Sheet: Sheet2
809
PBS	25	26	31	33	31	37	35	28	29	39	28		47	46	47	48	46	42							49	53	58	60	54	65	55						53	55			56	55	54
Hepcidin	8	9	9	8	10	8	10	8	7	9	12	10	41	45	34	36	35	35	40						46	27	46	28	17		29						10	11	11	13	10	11	12	13
Avg1	31.0909												46												56.2857												54.6
Avg2	9												38												32.1667												11.375
Ratio1	0.289474												0.826087												0.571489												0.208333
