# Supplementary material for: A crosstalk between hepcidin and IRE/IRP pathways controls ferroportin expression and determines serum iron levels in mice
Source: eLife. 2022 Sep 6;11:e81332. doi: 10.7554/eLife.81332 (PMC9499557; doi:10.7554/eLife.81332)
Supplement: Figure 4—source data 6. [file elife-81332-fig4-data6.xlsx]

## Sheet: 809 Serum
809_Serum_Updated_200919		5 weeks of diet
4x hepcidin injection. S.C. 0.5mg/ml injected 100ul/20g = 2.5ug/g
	Fe	mean	st				saturation	mean	st				ID
WT ND PBS	25	31.0909	4.50454				41	48.8182	7.12486				15
	26						46						16
	31						51						17
	33						52						51
	31						52						52
	37						57						53
	35						50						54
	28						38						58
	29						46						59
	39						62						60
	28						42						61
WT ND Hep	8	9	1.3484				9	13.6667	2.74138				18
	9						15						19
	9						10						20
	8						13						21
	10						15						22
	8						12						55
	10						15						56
	8						12						57
	7						13						62
	9						16						63
	12						19						64
	10						15						65
WT CID PBS	47	46	2.09762				90	87.5	4.72229				38
	46						81						39
	47						94						40
	48						84						41
	46						90						42
	42						86						43
WT CID Hep	41	38	4.08248				76	70.2857	12.3789				44
	45						87						45
	34						51						46
	36						65						47
	35						60						48
	35						73						49
	40						80						50
HJV ND PBS	49	56.2857	5.21901				92	94.4286	1.39728				1
	53						93						2
	58						95						3
	60						95						9
	54						95						10
	65						96						11
	55						95						12
HJV ND Hep	46	32.1667	11.5484				79	58	17.9555				4
	27						53						5
	46						79						6
	28						54						7
	17						33						8
													13
	29						50						14
HJV IDD PBS	53	54.6667	1.52753				91	93	2.82843				23
	55												24
													25
													26
	56						95						27
	55						95						28
	54						95						29
HJV IDD Hep	10	11	1.09545				20	19.8333	2.2286				30
	11						20						31
	11						20						32
	13						23						33
	10						16						34
	11						20						35
	12						21						36
	13						24						37
