# Supplementary material for: A crosstalk between hepcidin and IRE/IRP pathways controls ferroportin expression and determines serum iron levels in mice
Source: eLife. 2022 Sep 6;11:e81332. doi: 10.7554/eLife.81332 (PMC9499557; doi:10.7554/eLife.81332)
Supplement: Figure 5—source data 1. [file elife-81332-fig5-data1.xlsx]

## Sheet: 808 Liver
808 Liver Quantification	2020-03-14
	Ferroportin						Actin
	Set1	Set2	Set3	Set4	Normalized AVG		Set1	Set2	Set3	Set4	Normalized AVG	Normalized Induction		Fpn/Actin				Avg
WT ND	23216.3	663.335	3062.71	7021.67	1		17559.8	15151.7	23803.6	22836.4	1	1		1.32212	0.0437796	0.128666	0.307477	0.450512
WT ND LPS	5167.73	386.678	2817.1	5010.37	0.394002		18194.3	19862.3	34629.2	31955	1.3187	0.298781		0.284031	0.0194679	0.0813506	0.156795	0.135411
WT CID	12679.4	4236.02	4801.27	14899.3	1.07808		16823.3	19111.4	34912.3	34287.4	1.32492	0.813696		0.753678	0.221649	0.137524	0.434541	0.386848
WT CID LPS	8567.69	1208.45	6957.24	8895.48	0.75459		19101.3	17816.9	38978.2	37963	1.43487	0.525892		0.448539	0.067826	0.178491	0.23432	0.232294
HJVKO ND	101088	22215	30941.6	79416.6	6.87968		16815.4	17713.4	37698	38245.4	1.39219	4.94163		6.01163	1.25413	0.820777	2.0765	2.54076
HJVKO ND LPS	16203.9	2473.96	45353	40076.6	3.06523		19685.5	21295.1	39201.8	43899.4	1.5637	1.96024		0.823141	0.116175	1.15691	0.912918	0.752286
HJVKO IDD	74036.3	59711.4	83143.2	116234	9.80818		18695.6	25455	32103.8	35060.7	1.40281	6.99181		3.96009	2.34576	2.58983	3.31521	3.05272
HJVKO IDD LPS	56642.6	44523	72666.9	107345	8.2787		15716.6	22513.9	24056.6	21295.2	1.05332	7.85966		3.60401	1.97758	3.02066	5.04082	3.41077
	Average WT ND						Average WT ND
	8490.99						19837.9
	Fpn Normalized to AVG WT ND						Actin Normalized to AVG WT ND							Normalized Fpn/Actin				Avg
	2.73422	0.0781222	0.360701	0.826955			0.885166	0.763776	1.19991	1.15115				3.08894	0.102284	0.300608	0.718373	1.05255
	0.608613	0.0455398	0.331776	0.59008			0.917148	1.00123	1.74561	1.61081				0.663593	0.0454837	0.190063	0.366326	0.316366
	1.49327	0.498884	0.565454	1.75472			0.848041	0.963379	1.75988	1.72838				1.76085	0.517848	0.321303	1.01524	0.90381
	1.00903	0.142321	0.819367	1.04764			0.962873	0.898123	1.96484	1.91366				1.04794	0.158465	0.417015	0.547451	0.542718
	11.9053	2.6163	3.64405	9.35304			0.847641	0.892911	1.9003	1.9279				14.0452	2.93008	1.91762	4.85142	5.93609
	1.90837	0.291363	5.3413	4.71989			0.99232	1.07346	1.97611	2.21291				1.92314	0.271425	2.70294	2.13289	1.7576
	8.71939	7.03232	9.79193	13.6891			0.942419	1.28315	1.61831	1.76736				9.25213	5.48051	6.05073	7.74547	7.13221
	6.67091	5.24355	8.55811	12.6422			0.792251	1.13489	1.21266	1.07346				8.4202	4.62031	7.0573	11.7771	7.96872

## Sheet: 808 Spleen
808 Spleen Quantification	2020-03-14
	Ferroportin						Actin
	Set1	Set2	Set3	Set4	Normalized AVG		Set1	Set2	Set3	Set4	Normalized AVG	Normalized Induction		Fpn/Actin
WT ND	36910.1	22194.8	28994.4	48791.8	1		35638.1	52949.5	38384.4	58250	1	1		1.03569	0.419169	0.75537	0.837627
WT ND LPS	14836.3	3922.71	5142.27	9223.87	0.241982		39276	54664.5	44943.8	59650	1.07187	0.225756		0.377744	0.0717597	0.114416	0.154633
WT CID	14697.9	26246.3	12352.5	34166.2	0.638923		44062.8	62978.4	46454.6	62660.1	1.16701	0.547487		0.333567	0.416751	0.265904	0.545263
WT CID LPS	3610	3677.83	3723.54	9789.43	0.151951		40113.9	65793.9	49621	72052.4	1.22869	0.123669		0.0899939	0.0558993	0.0750396	0.135865
HJVKO ND	86203.9	57605.3	33346.8	68859	1.79716		42942.6	63993.7	59759.9	76316.3	1.31201	1.36978		2.00742	0.900172	0.558014	0.902285
HJVKO ND LPS	13344.1	14734.4	14120.4	50197.8	0.674965		39557.3	60222.7	57253.2	63495.1	1.19062	0.566904		0.337336	0.244665	0.246631	0.790578
HJVKO IDD	99078.5	122787	97582.6	123155	3.23325		42584.4	70364.3	54515.1	62545.6	1.2418	2.60367		2.32664	1.74501	1.79001	1.96904
HJVKO IDD LPS	91860.1	75106	47296.5	98347.5	2.28364		41015.5	62672.4	52148.4	51315.7	1.1184	2.04188		2.23964	1.19839	0.90696	1.91652
	Average WT ND						Average WT ND
	34222.8						46305.5
	Fpn Normalized to AVG WT ND						Actin Normalized to AVG WT ND							Normalized Fpn/Actin				Avg
	1.07853	0.648538	0.847225	1.42571			0.769629	1.14348	0.828937	1.25795				1.40136	0.567161	1.02206	1.13336	1.03098
	0.43352	0.114623	0.150259	0.269524			0.848194	1.18052	0.970593	1.28818				0.51111	0.0970952	0.154811	0.209228	0.243061
	0.429477	0.766925	0.360942	0.998347			0.951568	1.36006	1.00322	1.35319				0.451336	0.563889	0.359784	0.737774	0.528196
	0.105485	0.107467	0.108803	0.28605			0.866287	1.42087	1.0716	1.55602				0.121767	0.0756351	0.101533	0.183834	0.120692
	2.51891	1.68325	0.974404	2.01208			0.927375	1.38199	1.29056	1.6481				2.71617	1.21799	0.755027	1.22085	1.47751
	0.389919	0.430544	0.412602	1.4668			0.854269	1.30055	1.23642	1.37122				0.456436	0.331047	0.333706	1.0697	0.547722
	2.8951	3.58786	2.85139	3.59863			0.91964	1.51957	1.17729	1.35072				3.14808	2.36111	2.42199	2.66424	2.64885
	2.68418	2.19462	1.38202	2.87375			0.885759	1.35346	1.12618	1.1082				3.03037	1.62149	1.22717	2.59317	2.11805

## Sheet: 809 Liver
809 Liver Quantification	2020-03-14
	Ferroportin						Actin
	Set1	Set2	Set3	Set4	Normalized AVG		Set1	Set2	Set3	Set4	Normalized AVG	Normalized Induction		Fpn/Actin
WT ND	2081.13	28039.1	16408.4	13994.2	1		29603.5	19729.7	14083.3	27181.8	1	1		0.0703002	1.42116	1.1651	0.514839
WT ND Hep	455.82	12567	28320.1	2093.6	0.717688		30616.9	20564.9	18835.1	24750.9	1.04602	0.686111		0.0148878	0.61109	1.50358	0.0845869
WT CID	25232.2	12004.1	27758	11126.2	1.25771		30189.9	17366.1	18332.9	29256.5	1.05019	1.1976		0.83578	0.691236	1.51411	0.380299
WT CID Hep	18159.2	24006.5	18220.6	16494.2	1.27027		30979.6	18266.1	16374.8	28948.7	1.04383	1.21693		0.586165	1.31427	1.11272	0.569772
HJVKO ND	61195.1	148233	61141.2	120402	6.45989		34788.3	17563.6	15460.3	28445.7	1.06247	6.08007		1.75907	8.43977	3.95472	4.23269
HJVKO ND Hep	51071.6	55759.4	35352.1	42003.6	3.04326		31104.1	22088	18269.1	28732.1	1.10591	2.75182		1.64195	2.52442	1.93507	1.46191
HJVKO IDD	122197	140099	119781	116313	8.23474		27205.7	24449.7	19839.7	26123	1.07748	7.64257		4.4916	5.73007	6.03745	4.45252
HJVKO IDD Hep	9737.92	23479.7	26654.3	14438.7	1.22781		31076.5	22417.9	21084.1	26987.1	1.12105	1.09523		0.313353	1.04736	1.26419	0.535021
	Average WT ND						Average WT ND
	15130.7						22649.6

## Sheet: 809 Spleen
809 Spleen Quantification	2020-03-14
	Ferroportin						Actin
	Set1	Set2	Set3	Set4	Normalized AVG		Set1	Set2	Set3	Set4	Normalized AVG	Normalized Induction		Fpn/Actin				Avg
WT ND	47271.4	31700.9	18454.4	30658.2	1		48524.1	41261.9	72795.9	68745.3	1	1		0.974183	0.768285	0.25351	0.445969	0.610486
WT ND LPS	21527	4012.57	61764.9	1504.31	0.693358		54248.3	42726.7	69895.6	65481.8	1.00443	0.690299		0.396824	0.0939125	0.883673	0.0229729	0.349346
WT CID	31511.9	16604.1	10211.2	5104.06	0.495228		60681.1	48819.1	84312.8	59507.6	1.09507	0.452233		0.519304	0.340115	0.121111	0.0857716	0.266575
WT CID LPS	29974.2	1712.98	290.435	5914.91	0.295839		61695.3	52946.1	75992	57851.5	1.07417	0.275412		0.485843	0.0323533	0.00382192	0.102243	0.156065
HJVKO ND	32668.7	103791	19113	63489.1	1.71028		62682.1	49056.3	69449.4	57490	1.03178	1.65761		0.521179	2.11575	0.275208	1.10435	1.00412
HJVKO ND LPS	20384.2	8802	3839.83	2935.81	0.280766		61263.7	51357.1	75371.1	65782.2	1.09704	0.255932		0.33273	0.171388	0.0509457	0.0446293	0.149923
HJVKO IDD	63917.6	93744.8	84989.8	92785.5	2.61887		59737	50991.9	78626.1	64773.6	1.09857	2.38389		1.06998	1.83843	1.08094	1.43246	1.35545
HJVKO IDD LPS	11865.8	44773.9	4372.71	1102.65	0.484952		60432.9	47639.2	74189.9	65682.2	1.07183	0.452451		0.196346	0.939855	0.0589394	0.0167876	0.302982
	Average WT ND						Average WT ND
	32021.2						57831.8
	Fpn Normalized to AVG WT ND						Actin Normalized to AVG WT ND							Normalized Fpn/Actin				Avg
	1.47625	0.989996	0.576319	0.957435			0.839056	0.713481	1.25875	1.18871				1.75942	1.38756	0.45785	0.805439	1.10257
	0.672273	0.12531	1.92887	0.0469783			0.938036	0.73881	1.2086	1.13228				0.716682	0.16961	1.59595	0.0414901	0.630934
	0.984095	0.518534	0.318889	0.159396			1.04927	0.844157	1.4579	1.02898				0.937887	0.614263	0.218732	0.154907	0.481447
	0.936074	0.0534952	0.00907007	0.184718			1.06681	0.915519	1.31402	1.00034				0.877454	0.0584315	0.00690255	0.184656	0.281861
	1.02022	3.24131	0.596885	1.98272			1.08387	0.848258	1.20089	0.99409				0.941274	3.82114	0.497038	1.99451	1.81349
	0.636585	0.27488	0.119915	0.0916832			1.05934	0.888042	1.30328	1.13747				0.600925	0.309535	0.0920102	0.0806025	0.270768
	1.9961	2.92758	2.65417	2.89762			1.03294	0.881728	1.35957	1.12003				1.93244	3.32028	1.95222	2.58709	2.44801
	0.37056	1.39826	0.136557	0.0344349			1.04498	0.823754	1.28286	1.13575				0.35461	1.69742	0.106447	0.0303192	0.547199
