# Supplementary material for: A crosstalk between hepcidin and IRE/IRP pathways controls ferroportin expression and determines serum iron levels in mice
Source: eLife. 2022 Sep 6;11:e81332. doi: 10.7554/eLife.81332 (PMC9499557; doi:10.7554/eLife.81332)
Supplement: Figure 6—source data 1. [file elife-81332-fig6-data1.xlsx]

## Sheet: Sheet1
	Liver	Not normalizing to BME
		IRP1 Samples	Background	Difference	BME Samples	Background	Difference	Ratio	Normalized				IRP2 Samples	Background	Difference	BME Samples	Background	Difference	Ratio
	1	82.462	146.624		99.541	148.259						1	100.482	144.554
	2	79.099	146.223		103.945	147.667						2	104.899	141.247
	3	94.749	148.339		100.764	145.761						3	122.642	144.449
	4	99.368	148.935		86.246	144.123						4	123.448	144.948
	5	98.201	148.52		98.521	147.015						5	124.656	146.269
	6	96.882	147.873		88.834	145.095						6	127.344	145.88
	7	98.094	146.821		80.79	143.617						7	114.032	146.256
	8	97.543	147.154		79.098	141.954						8	114.967	145.98
	Invert											Invert
	1	172.538	108.376	64.162	155.459	106.741	48.718	1.31701	0.977439	65.643		1	154.518	110.446	44.072				1.09605	40.21
	2	175.901	108.777	67.124	151.055	107.333	43.722	1.53525	1.02256			2	150.101	113.753	36.348				0.903954
	3	160.251	106.661	53.59	154.236	109.239	44.997	1.19097	0.816386			3	132.358	110.551	21.807				0.542328
	4	155.632	106.065	49.567	168.754	110.877	57.877	0.85642	0.7551			4	131.552	110.052	21.5				0.534693
	5	156.799	106.48	50.319	156.479	107.985	48.494	1.03763	0.766555			5	130.344	108.731	21.613				0.537503
	6	158.118	107.127	50.991	166.166	109.905	56.261	0.906329	0.776793			6	127.656	109.12	18.536				0.46098
	7	156.906	108.179	48.727	174.21	111.383	62.827	0.775574	0.742303			7	140.968	108.744	32.224				0.801393
	8	157.457	107.846	49.611	175.902	113.046	62.856	0.78928	0.75577			8	140.033	109.02	31.013				0.771276
	Spleen
		IRP1 Samples	Background	Difference	BME Samples	Background	Difference	Ratio	Normalized				IRP2 Samples	Background	Difference	BME Samples	Background	Difference	Ratio	Normalized	Darker Exposure
	1	130.417	173.791		108.076	175.202						1	170.263	173.791							101.331
	2	117.607	173.761		94.389	174.743						2	165.497	173.761							76.38
	3	119.048	174.799		86.899	173.801						3	160.751	174.799							69.837
	4	121.462	174.633		91.249	175.005						4	165.509	174.633							71.294
	5	132.163	175.289		91.635	175.235						5	172.714	175.289							96.235
	6	140.203	176.61		102.008	176.645						6	172.596	176.61							95.402
	7	124.329	176.358		100.607	175.985						7	169.348	176.358							82.378
	8	118.765	175.582		88.935	175.253						8	170.283	175.582							70.376
	9	124.818	175.498		104.231	176.142						9	168.682	175.498							74.762
	10	136.071	175.349		104.519	176.586						10	169.533	175.349							80.632
	11	100.281	173.275		89.895	174.843						11	119.264	173.275							37.749
	12	120.353	175.09		92.892	174.559						12	151.423	175.09							57.247
	Invert											Invert
	1	124.583	81.209	43.374	146.924	79.798	67.126	0.646158	0.837988	51.7597		1	84.737	81.209	3.528				0.409598	8.61333
	2	137.393	81.239	56.154	160.611	80.257	80.354	0.698833	1.0849			2	89.503	81.239	8.264				0.959443
	3	135.952	80.201	55.751	168.101	81.199	86.902	0.641539	1.07711			3	94.249	80.201	14.048				1.63096
	4	133.538	80.367	53.171	163.751	79.995	83.756	0.634832	1.02727			4	89.491	80.367	9.124				1.05929
	5	122.837	79.711	43.126	163.365	79.765	83.6	0.515861	0.833197			5	82.286	79.711	2.575				0.298955
	6	114.797	78.39	36.407	152.992	78.355	74.637	0.487788	0.703386			6	82.404	78.39	4.014				0.466022
	7	130.671	78.642	52.029	154.393	79.015	75.378	0.690241	1.0052			7	85.652	78.642	7.01				0.813854
	8	136.235	79.418	56.817	166.065	79.747	86.318	0.658229	1.09771			8	84.717	79.418	5.299				0.615209
	9	130.182	79.502	50.68	150.769	78.858	71.911	0.70476	0.979141			9	86.318	79.502	6.816				0.791331
	10	118.929	79.651	39.278	150.481	78.414	72.067	0.545021	0.758853			10	85.467	79.651	5.816				0.675232
	11	154.719	81.725	72.994	165.105	80.157	84.948	0.859279	1.41025			11	135.736	81.725	54.011				6.27063
	12	134.647	79.91	54.737	162.108	80.441	81.667	0.670246	1.05752			12	103.577	79.91	23.667				2.74772
	PMH
		IRP1 Samples	Background	Difference	BME Samples	Background	Difference	Ratio	Normalized				IRP2 Samples	Background	Difference	BME Samples	Background	Difference	Ratio	Normalized
	1	142.207	176.118		95.04	175.387						1	104.049	152.547
	2	152.483	175.671		92.594	175.514						2	111.353	150.693
	3	156.292	176.333		95.583	174.543						3	104.827	153.881
	4	160.415	176.898		94.153	174.203						4	137.59	156.504
	5	165.531	176.321		101.461	174.979						5	142.998	154.232
	6	167.259	177.005		97.422	174.903						6	144.389	158.576
	7	153.332	177.084		102.48	175.431						7	121.585	157.078
	8	162.868	177.765		103.094	174.967						8	133.566	156.406
	9	157.594	176.938		105.655	175.706						9	128.9	154.071
	10	158.992	177.263		99.46	175.013						10	115.318	162.167
	11	155.439	176.763		97.779	175.765						11	105.505	157.905
	12	139.781	176.111		98.066	175.328						12	91.286	154.902
	Invert											Invert
	1	112.793	78.882	33.911	159.96	79.613	80.347	0.422057	1.31881	25.7133		1	150.951	102.453	48.498				1.06284	45.6307
	2	102.517	79.329	23.188	162.406	79.486	82.92	0.279643	0.901789			2	143.647	104.307	39.34				0.862139
	3	98.708	78.667	20.041	159.417	80.457	78.96	0.253812	0.779401			3	150.173	101.119	49.054				1.07502
	4	94.585	78.102	16.483	160.847	80.797	80.05	0.205909	0.641029			4	117.41	98.496	18.914				0.414502
	5	89.469	78.679	10.79	153.539	80.021	73.518	0.146767	0.419627			5	112.002	100.768	11.234				0.246194
	6	87.741	77.995	9.746	157.578	80.097	77.481	0.125786	0.379025			6	110.611	96.424	14.187				0.310909
	7	101.668	77.916	23.752	152.52	79.569	72.951	0.325588	0.923723			7	133.415	97.922	35.493				0.777832
	8	92.132	77.235	14.897	151.906	80.033	71.873	0.207268	0.579349			8	121.434	98.594	22.84				0.500541
	9	97.406	78.062	19.344	149.345	79.294	70.051	0.276142	0.752295			9	126.1	100.929	25.171				0.551625
	10	96.008	77.737	18.271	155.54	79.987	75.553	0.24183	0.710565			10	139.682	92.833	46.849				1.0267
	11	99.561	78.237	21.324	157.221	79.235	77.986	0.273434	0.829297			11	149.495	97.095	52.4				1.14835
	12	115.219	78.889	36.33	156.934	79.672	77.262	0.470218	1.41289			12	163.714	100.098	63.616				1.39415
	NPC
		IRP1 Samples	Background	Difference	BME Samples	Background	Difference	Ratio	Normalized				IRP2 Samples	Background	Difference	BME Samples	Background	Difference	Ratio	Normalized
	1	130.052	173.484		91.15	160.326						1	154.408	169.751
	2	78.537	155.014		67.102	135.113						2	53.408	78.046
	3	99.864	170.281		74.452	149.476						3	108.759	143.228
	4	121.612	173.427		91.092	160.805						4	148.264	167.277
	5	94.358	167.418		75.452	145.529						5	116.03	136.639
	6	110.775	172.536		88.543	156.891						6	127.526	161.417
	7	114.077	172.798		79.115	152.079						7	126.265	158.508
	8	79.077	158.715		63.352	133.599						8	65.692	106.211
	9	104.011	171.984		83.122	155.071						9	116.282	156.152
	10	115.794	173.229		88.175	157.707						10	98.985	167.312
	11	81.923	161.271		69.8	143.242						11	78.301	115.353
	12	68.947	148.878		59.948	131.96						12	47.142	75.634
	Invert											Invert
	1	124.948	81.516	43.432	163.85	94.674	69.176	0.627848	0.684594	63.442		1	100.592	85.249	15.343				0.618254	24.8167
	2	176.463	99.986	76.477	187.898	119.887	68.011	1.12448	1.20546			2	201.592	176.954	24.638				0.992801
	3	155.136	84.719	70.417	180.548	105.524	75.024	0.938593	1.10994			3	146.241	111.772	34.469				1.38895
	4	133.388	81.573	51.815	163.908	94.195	69.713	0.743262	0.81673			4	106.736	87.723	19.013				0.766138
	5	160.642	87.582	73.06	179.548	109.471	70.077	1.04257	1.1516			5	138.97	118.361	20.609				0.83045
	6	144.225	82.464	61.761	166.457	98.109	68.348	0.903626	0.973503			6	127.474	93.583	33.891				1.36565
	7	140.923	82.202	58.721	175.885	102.921	72.964	0.804794	0.925586			7	128.735	96.492	32.243				1.29925
	8	175.923	96.285	79.638	191.648	121.401	70.247	1.13369	1.25529			8	189.308	148.789	40.519				1.63273
	9	150.989	83.016	67.973	171.878	99.929	71.949	0.944739	1.07142			9	138.718	98.848	39.87				1.60658
	10	139.206	81.771	57.435	166.825	97.293	69.532	0.826023	0.905315			10	156.015	87.688	68.327				2.75327
	11	173.077	93.729	79.348	185.2	111.758	73.442	1.08042	1.25072			11	176.699	139.647	37.052				1.49303
	12	186.053	106.122	79.931	195.052	123.04	72.012	1.10997	1.25991			12	207.858	179.366	28.492				1.1481
