# Supplementary material for: A crosstalk between hepcidin and IRE/IRP pathways controls ferroportin expression and determines serum iron levels in mice
Source: eLife. 2022 Sep 6;11:e81332. doi: 10.7554/eLife.81332 (PMC9499557; doi:10.7554/eLife.81332)
Supplement: Figure 6—source data 2. [file elife-81332-fig6-data2.xlsx]

## Sheet: Sheet1
		FPN	Background				Actin	Background
	Hep Wt	94.077	103.517			1	93.981	132.394
	Hep Wt	83.828	101.187			2	75.533	132.599
	Hep Wt	92.944	100.525			3	85.167	126.907
	Hep KO	81.534	106.714			4	78.054	125.43
	Hep KO	72.272	104.467			5	81.082	130.385
	Hep KO	79.622	112.712			6	69.194	126.733
	NPC Wt	80.533	105.583			7	76.284	127.279
	NPC Wt	76.945	101.032			8	69.722	127.475
	NPC Wt	69.239	102.325			9	67.029	130.718
	NPC KO	44.126	98.713			10	54.875	129.04
	NPC KO	53.971	110.672			11	62.134	130.04
	NPC KO	64.683	121.805			12	69.316	123.353
	Invert
	Hep Wt	160.923	151.483	9.44			161.019	122.606	38.413	0.24575	1
	Hep Wt	171.172	153.813	17.359			179.467	122.401	57.066	0.304192	1.23781
	Hep Wt	162.056	154.475	7.581			169.833	128.093	41.74	0.181624	0.739061
	Hep KO	173.466	148.286	25.18			176.946	129.57	47.376	0.531493	2.16274
	Hep KO	182.728	150.533	32.195			173.918	124.615	49.303	0.653003	2.65718
	Hep KO	175.378	142.288	33.09			185.806	128.267	57.539	0.575088	2.34013
	NPC Wt	174.467	149.417	25.05			178.716	127.721	50.995	0.491225	1.99888
	NPC Wt	178.055	153.968	24.087			185.278	127.525	57.753	0.417069	1.69713
	NPC Wt	185.761	152.675	33.086			187.971	124.282	63.689	0.519493	2.11391
	NPC KO	210.874	156.287	54.587			200.125	125.96	74.165	0.736021	2.995
	NPC KO	201.029	144.328	56.701			192.866	124.96	67.906	0.834992	3.39773
	NPC KO	190.317	133.195	57.122			185.684	131.647	54.037	1.05709	4.30148
