# Supplementary material for: A crosstalk between hepcidin and IRE/IRP pathways controls ferroportin expression and determines serum iron levels in mice
Source: eLife. 2022 Sep 6;11:e81332. doi: 10.7554/eLife.81332 (PMC9499557; doi:10.7554/eLife.81332)
Supplement: Figure 7—source data 1. [file elife-81332-fig7-data1.xlsx]

## Sheet: 809 Polysome Run 2
809	Liver 17 WT ND			6 ul sample + 6 ul Water
FPN+IRE	Efficiency target	Target Ct 1	Target Ct 2	Target Ct					WT ND	FPN
1	2	28.454	28.2364	28.3452								ΔCT fraction x		% of mRNA in each fraction
2	2	26.6125	27.2266	26.9196					Target mRNA	Fraction Number	CT	CT (fraction 1) - CT (fraction x)	2^(ΔCT fraction x)	2^(ΔCT fraction x) * 100/Sum
3	2	28.0298	27.1285	27.5792					Fpn	1	28.3452	0	1	6.81207
4	2	26.9765	26.6527	26.8146					Fpn	2	26.9196	1.4256	2.68626	18.299
5	2	26.5109	26.234	26.3724					Fpn	3	27.5792	0.765985	1.70053	11.5841
6	2	31.6139	31.6139	31.6139					Fpn	4	26.8146	1.53058	2.88902	19.6802
7	2	28.8707	29.0279	28.9493					Fpn	5	26.3724	1.97273	3.9251	26.7381
8	2	31.8374	29.7557	30.7965					Fpn	6	31.6139	-3.26869	0.103759	0.706813	83.8203
9	2	29.6241	28.6974	29.1607					Fpn	7	28.9493	-0.604151	0.657859	4.48138
10	2	31.3578	30.3012	30.8295					Fpn	8	30.7965	-2.45136	0.182838	1.2455
11	2	29.685	29.8721	29.7785					Fpn	9	29.1607	-0.815579	0.56818	3.87048
12	2	29.7024	29.5096	29.606					Fpn	10	30.8295	-2.48433	0.178707	1.21737
									Fpn	11	29.7785	-1.43338	0.370263	2.52226
		34.0001							Fpn	12	29.606	-1.26081	0.417311	2.84275	16.1797
													14.6798	100
809	Liver 40 WT CID			6 ul sample + 6 ul Water					WT CID	FPN
FPN+IRE	Efficiency target	Target Ct 1	Target Ct 2	Target Ct								ΔCT fraction x		% of mRNA in each fraction
1	2	28.9592	27.9575	28.4584					Target mRNA	Fraction Number	CT	CT (fraction 1) - CT (fraction x)	2^(ΔCT fraction x)	2^(ΔCT fraction x) * 100/Sum
2	2	27.7433	27.478	27.6107					Fpn	1	28.4584	0	1	5.39939
3	2	27.6046	27.6955	27.6501					Fpn	2	27.6107	0.847692	1.79962	9.71684
4	2	28.2184	27.8509	28.0347					Fpn	3	27.6501	0.808271	1.75111	9.45493
5	2	27.3139	26.9021	27.108					Fpn	4	28.0347	0.423697	1.34136	7.24252
6	2	30.7507	29.4768	30.1137					Fpn	5	27.108	1.35032	2.54969	13.7668
7	2	27.7471	27.4185	27.5828					Fpn	6	30.1137	-1.65539	0.317453	1.71405	47.2945
8	2	27.7674	28.2547	28.0111					Fpn	7	27.5828	0.87554	1.83469	9.90622
9	2	27.8696	27.2309	27.5503					Fpn	8	28.0111	0.447286	1.36347	7.36191
10	2	27.7113	28.1377	27.9245					Fpn	9	27.5503	0.90808	1.87655	10.1322
11	2	27.5347	27.3441	27.4394					Fpn	10	27.9245	0.533845	1.44778	7.81714
12	2	27.9792	28.3816	28.1804					Fpn	11	27.4394	1.01895	2.02644	10.9415
									Fpn	12	28.1804	0.277928	1.21245	6.5465	52.7055
		34.0001											18.5206	100
									HJV ND	FPN
												ΔCT fraction x		% of mRNA in each fraction
809	Liver 3 HJV ND			6 ul sample + 6 ul Water					Target mRNA	Fraction Number	CT	CT (fraction 1) - CT (fraction x)	2^(ΔCT fraction x)	2^(ΔCT fraction x) * 100/Sum
FPN+IRE	Efficiency target	Target Ct 1	Target Ct 2	Target Ct					Fpn	1	30.5511	0	1	2.59267
1	2	29.9644	31.1378	30.5511					Fpn	2	28.8596	1.69153	3.23	8.37432
2	2	28.8317	28.8875	28.8596					Fpn	3	28.4947	2.05638	4.15941	10.784
3	2	28.5505	28.4389	28.4947					Fpn	4	28.0414	2.5097	5.69502	14.7653
4	2	27.6738	28.4091	28.0414					Fpn	5	29.4006	1.15049	2.21989	5.75545
5	2	29.5486	29.2527	29.4006					Fpn	6	31.3064	-0.755277	0.592433	1.53598	43.8077
6	2	31.5961	31.0166	31.3064					Fpn	7	29.2247	1.32637	2.50771	6.50165
7	2	28.8269	29.6226	29.2247					Fpn	8	29.7708	0.780321	1.71751	4.45294
8	2	29.6816	29.86	29.7708					Fpn	9	28.4794	2.07175	4.20395	10.8995
9	2	28.3985	28.5602	28.4794					Fpn	10	29.047	1.5041	2.83647	7.35404
10	2	28.4028	29.6912	29.047					Fpn	11	28.3784	2.17266	4.50853	11.6891
11	2	27.9188	28.8381	28.3784					Fpn	12	27.9905	2.56056	5.89936	15.2951	56.1923
12	2	27.4198	28.5613	27.9905									38.5703	100
		34.0001							HJV IDD	FPN
												ΔCT fraction x		% of mRNA in each fraction
									Target mRNA	Fraction Number	CT	CT (fraction 1) - CT (fraction x)	2^(ΔCT fraction x)	2^(ΔCT fraction x) * 100/Sum
									Fpn	1	33.0247	0	1	1.00846
809	Liver 25 HJV IDD			6 ul sample + 6 ul Water					Fpn	2	31.4132	1.61148	3.05566	3.0815
FPN+IRE	Efficiency target	Target Ct 1	Target Ct 2	Target Ct					Fpn	3	28.5535	4.47117	22.1797	22.3673
1	2	33.4475	32.6019	33.0247					Fpn	4	28.3465	4.67824	25.6029	25.8195
2	2	32.1421	30.6843	31.4132					Fpn	5	28.4709	4.55382	23.4876	23.6862
3	2	28.7834	28.3237	28.5535					Fpn	6	31.1554	1.8693	3.65355	3.68446	79.6475
4	2	29.0807	27.6123	28.3465					Fpn	7	30.7516	2.27311	4.83364	4.87453
5	2	28.8438	28.098	28.4709					Fpn	8	31.693	1.33171	2.51702	2.53831
6	2	31.6049	30.7059	31.1554					Fpn	9	31.6947	1.32998	2.51398	2.53525
7	2	30.6159	30.8872	30.7516					Fpn	10	32.1406	0.88407	1.84558	1.86119
8	2	31.693	31.693	31.693					Fpn	11	30.4846	2.5401	5.81628	5.86548
9	2	30.804	32.5855	31.6947					Fpn	12	31.6158	1.40887	2.65529	2.67775	20.3525
10	2	31.7802	32.501	32.1406									99.1612	100
11	2	29.3555	31.6137	30.4846
12	2	31.6158	31.6158	31.6158
		34.0001
809	Liver 17 WT ND			6 ul sample + 6 ul Water					WT ND	RPL19
RPL19	Efficiency target	Target Ct 1	Target Ct 2	Target Ct								ΔCT fraction x		% of mRNA in each fraction
1	2	31.2491	31.253	31.2511					Target mRNA	Fraction Number	CT	CT (fraction 1) - CT (fraction x)	2^(ΔCT fraction x)	2^(ΔCT fraction x) * 100/Sum
2	2	28.9541	28.9428	28.9484					RPL19	1	31.2511	0	1	3.72949
3	2	29.3573	29.0347	29.196					RPL19	2	28.9484	2.30267	4.93369	18.4002
4	2	30.0548	30.448	30.2514					RPL19	3	29.196	2.05506	4.15562	15.4983
5	2	30.4991	30.2749	30.387					RPL19	4	30.2514	0.999715	1.9996	7.45751
6	2	32.8794	32.3593	32.6194					RPL19	5	30.387	0.864073	1.82017	6.7883
7	2	31.8194	32.025	31.9222					RPL19	6	32.6194	-1.36827	0.387355	1.44464
8	2	32.2748	32.8754	32.5751					RPL19	7	31.9222	-0.671143	0.628009	2.34215
9	2	32.0487	31.8772	31.963					RPL19	8	32.5751	-1.32397	0.399433	1.48968
10	2	30.1463	30.6691	30.4077					RPL19	9	31.963	-0.711883	0.610523	2.27694
11	2	29.2275	29.2199	29.2237					RPL19	10	30.4077	0.843351	1.79421	6.6915
12	2	29.1395	28.7142	28.9269					RPL19	11	29.2237	2.02741	4.07671	15.2041
									RPL19	12	28.9269	2.32423	5.00799	18.6773
		35.9296											26.8133	100
									WT CID	RPL19
809	Liver 40 WT CID			6 ul sample + 6 ul Water								ΔCT fraction x		% of mRNA in each fraction
RPL19	Efficiency target	Target Ct 1	Target Ct 2	Target Ct					Target mRNA	Fraction Number	CT	CT (fraction 1) - CT (fraction x)	2^(ΔCT fraction x)	2^(ΔCT fraction x) * 100/Sum
1	2	31.1227	31.6096	31.3661					RPL19	1	31.3661	0	1	2.61653
2	2	30.3126	29.9893	30.151					RPL19	2	30.151	1.21517	2.32168	6.07474
3	2	29.2482	29.2589	29.2536					RPL19	3	29.2536	2.11256	4.32457	11.3154
4	2	30.5259	30.4186	30.4722					RPL19	4	30.4722	0.893873	1.85816	4.86193
5	2	31.4048	30.8669	31.1359					RPL19	5	31.1359	0.230248	1.17304	3.06929
6	2	31.5508	30.9834	31.2671					RPL19	6	31.2671	0.0990171	1.07104	2.80242
7	2	30.1797	30.3894	30.2846					RPL19	7	30.2846	1.08156	2.11632	5.53743
8	2	31.1507	30.5821	30.8664					RPL19	8	30.8664	0.499711	1.41393	3.6996
9	2	29.7747	29.9154	29.8451					RPL19	9	29.8451	1.52105	2.86999	7.50943
10	2	29.1696	29.2399	29.2048					RPL19	10	29.2048	2.16136	4.47335	11.7047
11	2	27.8399	27.5058	27.6728					RPL19	11	27.6728	3.69328	12.9356	33.8465
12	2	29.8146	30.094	29.9543					RPL19	12	29.9543	1.41185	2.66079	6.96205
													38.2185	100
		35.9296
									HJV ND	RPL19
												ΔCT fraction x		% of mRNA in each fraction
									Target mRNA	Fraction Number	CT	CT (fraction 1) - CT (fraction x)	2^(ΔCT fraction x)	2^(ΔCT fraction x) * 100/Sum
809	Liver 3 HJV ND			6 ul sample + 6 ul Water					RPL19	1	33.0883	0	1	1.06995
RPL19	Efficiency target	Target Ct 1	Target Ct 2	Target Ct					RPL19	2	32.249	0.839258	1.78913	1.91427
1	2	33.2163	32.9602	33.0883					RPL19	3	30.0155	3.07276	8.41382	9.00232
2	2	31.9379	32.5602	32.249					RPL19	4	30.7404	2.34785	5.09066	5.44672
3	2	29.9866	30.0444	30.0155					RPL19	5	31.5692	1.51908	2.86609	3.06656
4	2	30.6926	30.7882	30.7404					RPL19	6	33.064	0.0243206	1.017	1.08813
5	2	31.4152	31.7232	31.5692					RPL19	7	31.6596	1.42866	2.69196	2.88025
6	2	33.2661	32.8618	33.064					RPL19	8	32.0816	1.00663	2.00921	2.14974
7	2	31.8095	31.5097	31.6596					RPL19	9	31.0066	2.08167	4.23298	4.52906
8	2	32.1236	32.0397	32.0816					RPL19	10	29.6764	3.41184	10.643	11.3874
9	2	31.068	30.9452	31.0066					RPL19	11	27.9118	5.17652	36.1649	38.6944
10	2	29.6021	29.7508	29.6764					RPL19	12	28.9554	4.13291	17.544	18.7711
11	2	27.9563	27.8672	27.9118									93.4627	100
12	2	28.9018	29.0089	28.9554
									HJV IDD	RPL19
		35.9296										ΔCT fraction x		% of mRNA in each fraction
									Target mRNA	Fraction Number	CT	CT (fraction 1) - CT (fraction x)	2^(ΔCT fraction x)	2^(ΔCT fraction x) * 100/Sum
									RPL19	1	33.9606	0	1	1.15008
									RPL19	2	33.1183	0.842381	1.79301	2.0621
809	Liver 25 HJV IDD			6 ul sample + 6 ul Water					RPL19	3	29.7587	4.20188	18.4032	21.1652
RPL19	Efficiency target	Target Ct 1	Target Ct 2	Target Ct					RPL19	4	30.9387	3.02193	8.12255	9.3416
1	2	34.4702	33.4511	33.9606					RPL19	5	31.0362	2.92443	7.59174	8.73113
2	2	33.6346	32.6019	33.1183					RPL19	6	31.6005	2.36018	5.13433	5.90491
3	2	29.8985	29.619	29.7587					RPL19	7	31.9375	2.02311	4.06458	4.6746
4	2	30.8965	30.9809	30.9387					RPL19	8	32.6052	1.35546	2.55878	2.94281
5	2	30.9752	31.0972	31.0362					RPL19	9	32.6287	1.33198	2.51747	2.8953
6	2	31.7049	31.496	31.6005					RPL19	10	30.9924	2.96823	7.82573	9.00024
7	2	32.3009	31.5741	31.9375					RPL19	11	29.65	4.31061	19.8437	22.8219
8	2	32.5047	32.7057	32.6052					RPL19	12	30.9436	3.01706	8.09518	9.31012
9	2	32.4313	32.826	32.6287									86.9503	100
10	2	30.964	31.0208	30.9924
11	2	29.6292	29.6709	29.65
12	2	30.9436	30.9436	30.9436
		35.9296
809	Liver 17 WT ND			6 ul sample + 6 ul Water					WT ND	Ferritin-H
Ferritin-H	Efficiency target	Target Ct 1	Target Ct 2	Target Ct								ΔCT fraction x		% of mRNA in each fraction
1	2	27.4275	27.3842	27.4058					Target mRNA	Fraction Number	CT	CT (fraction 1) - CT (fraction x)	2^(ΔCT fraction x)	2^(ΔCT fraction x) * 100/Sum
2	2	26.0436	25.9658	26.0047					Ferritin-H	1	27.4058	0	1	16.6743
3	2	27.2137	26.9428	27.0782					Ferritin-H	2	26.0047	1.40112	2.64107	44.0381
4	2	28.5878	28.4541	28.521					Ferritin-H	3	27.0782	0.327606	1.25493	20.9251
5	2	28.9536	29.1865	29.07					Ferritin-H	4	28.521	-1.11512	0.461654	7.69776
6	2	32.9401	32.0793	32.5097					Ferritin-H	5	29.07	-1.66421	0.315518	5.26104
7	2	32.0559	31.9479	32.0019					Ferritin-H	6	32.5097	-5.10388	0.0290789	0.484871
8	2	32.9696	32.4657	32.7177					Ferritin-H	7	32.0019	-4.59608	0.0413469	0.689431
9	2	32.2379	31.7669	32.0024					Ferritin-H	8	32.7177	-5.31184	0.0251754	0.419782
10	2	31.9143	32.037	31.9757					Ferritin-H	9	32.0024	-4.59657	0.0413329	0.689198
11	2	31.2512	31.3344	31.2928					Ferritin-H	10	31.9757	-4.56982	0.0421063	0.702094
12	2	31.2605	30.9329	31.0967					Ferritin-H	11	31.2928	-3.88696	0.067594	1.12709
									Ferritin-H	12	31.0967	-3.69085	0.0774361	1.2912
		35.9296											5.99724	100
									WT CID	Ferritin-H
809	Liver 40 WT CID			6 ul sample + 6 ul Water								ΔCT fraction x		% of mRNA in each fraction
Ferritin-H	Efficiency target	Target Ct 1	Target Ct 2	Target Ct					Target mRNA	Fraction Number	CT	CT (fraction 1) - CT (fraction x)	2^(ΔCT fraction x)	2^(ΔCT fraction x) * 100/Sum
1	2	29.1109	29.0429	29.0769					Ferritin-H	1	29.0769	0	1	11.8192
2	2	28.3213	28.2926	28.3069					Ferritin-H	2	28.3069	0.769983	1.70525	20.1547
3	2	27.9795	28.2182	28.0988					Ferritin-H	3	28.0988	0.97808	1.96984	23.282
4	2	29.511	29.6424	29.5767					Ferritin-H	4	29.5767	-0.499781	0.707214	8.35873
5	2	30.5783	30.2425	30.4104					Ferritin-H	5	30.4104	-1.33349	0.396807	4.68995
6	2	32.0406	32.1847	32.1127					Ferritin-H	6	32.1127	-3.03575	0.12194	1.44124
7	2	31.318	31.3387	31.3284					Ferritin-H	7	31.3284	-2.25144	0.210014	2.48221
8	2	31.0285	30.6777	30.8531					Ferritin-H	8	30.8531	-1.77615	0.291961	3.45075
9	2	30.6566	30.4478	30.5522					Ferritin-H	9	30.5522	-1.47528	0.359664	4.25096
10	2	30.4682	30.342	30.4051					Ferritin-H	10	30.4051	-1.32823	0.398258	4.7071
11	2	29.2081	29.3838	29.2959					Ferritin-H	11	29.2959	-0.219018	0.85915	10.1545
12	2	30.1158	30.4023	30.2591					Ferritin-H	12	30.2591	-1.18217	0.440687	5.20858
													8.46079	100
		35.9296
									HJV ND	Ferritin-H
												ΔCT fraction x		% of mRNA in each fraction														Ferriti
									Target mRNA	Fraction Number	CT	CT (fraction 1) - CT (fraction x)	2^(ΔCT fraction x)	2^(ΔCT fraction x) * 100/Sum
809	Liver 3 HJV ND			6 ul sample + 6 ul Water					Ferritin-H	1	31.6641	0	1	3.6048
Ferritin-H	Efficiency target	Target Ct 1	Target Ct 2	Target Ct					Ferritin-H	2	30.7225	0.941516	1.92055	6.92318
1	2	31.3975	31.9306	31.6641					Ferritin-H	3	30.348	1.31606	2.48986	8.97545
2	2	30.6733	30.7718	30.7225					Ferritin-H	4	30.691	0.973033	1.96296	7.07609
3	2	30.3828	30.3132	30.348					Ferritin-H	5	31.9023	-0.238197	0.847804	3.05616
4	2	30.8294	30.5527	30.691					Ferritin-H	6	32.7281	-1.06403	0.478294	1.72416
5	2	31.7024	32.1021	31.9023					Ferritin-H	7	31.8662	-0.202103	0.869283	3.13359
6	2	32.5753	32.8809	32.7281					Ferritin-H	8	31.361	0.303061	1.23376	4.44746
7	2	31.6336	32.0987	31.8662					Ferritin-H	9	30.6286	1.03547	2.04978	7.38906
8	2	31.2175	31.5045	31.361					Ferritin-H	10	30.0852	1.57888	2.98737	10.7689
9	2	30.5943	30.6628	30.6286					Ferritin-H	11	29.0315	2.63257	6.20129	22.3544
10	2	30.2831	29.8873	30.0852					Ferritin-H	12	29.1531	2.51092	5.69983	20.5467
11	2	29.0619	29.0011	29.0315									27.7408	100
12	2	29.1802	29.1261	29.1531
									HJV IDD	Ferritin-H
		35.9296										ΔCT fraction x		% of mRNA in each fraction
									Target mRNA	Fraction Number	CT	CT (fraction 1) - CT (fraction x)	2^(ΔCT fraction x)	2^(ΔCT fraction x) * 100/Sum
									Ferritin-H	1	31.1042	0	1	7.02295
									Ferritin-H	2	30.4693	0.634886	1.55281	10.9053
809	Liver 25 HJV IDD			6 ul sample + 6 ul Water					Ferritin-H	3	28.8013	2.30289	4.93444	34.6543
Ferritin-H	Efficiency target	Target Ct 1	Target Ct 2	Target Ct					Ferritin-H	4	29.9193	1.18483	2.27336	15.9657
1	2	31.2371	30.9712	31.1042					Ferritin-H	5	30.5633	0.540845	1.45482	10.2172
2	2	30.5432	30.3954	30.4693					Ferritin-H	6	32.0036	-0.899446	0.536092	3.76495
3	2	28.6766	28.926	28.8013					Ferritin-H	7	32.0433	-0.939104	0.521557	3.66287
4	2	29.8949	29.9438	29.9193					Ferritin-H	8	32.281	-1.17684	0.442318	3.10638
5	2	30.6474	30.4793	30.5633					Ferritin-H	9	32.2402	-1.13604	0.455006	3.19549
6	2	31.7968	32.2105	32.0036					Ferritin-H	10	32.4672	-1.36299	0.388777	2.73036
7	2	32.2122	31.8743	32.0433					Ferritin-H	11	32.2404	-1.13618	0.454962	3.19517
8	2	32.0753	32.4867	32.281					Ferritin-H	12	33.257	-2.15279	0.224878	1.57931
9	2	32.2822	32.1982	32.2402									14.239	100
10	2	32.5128	32.4215	32.4672
11	2	31.9318	32.549	32.2404
12	2	32.9127	33.6012	33.257
		35.9296
809	Liver 17 WT ND			6 ul sample + 6 ul Water					WT ND	B-Actin
B-Actin	Efficiency target	Target Ct 1	Target Ct 2	Target Ct								ΔCT fraction x		% of mRNA in each fraction
1	2	33.3367	32.9216	33.1291					Target mRNA	Fraction Number	CT	CT (fraction 1) - CT (fraction x)	2^(ΔCT fraction x)	2^(ΔCT fraction x) * 100/Sum
2	2	30.9115	30.76	30.8358					B-Actin	1	33.1291	0	1	1.85467
3	2	31.1504	31.3687	31.2596					B-Actin	2	30.8358	2.29338	4.90203	9.09162
4	2	30.3142	30.0998	30.207					B-Actin	3	31.2596	1.86958	3.65427	6.77744
5	2	29.921	29.5649	29.743					B-Actin	4	30.207	2.92217	7.57985	14.0581
6	2	32.9239	33.4553	33.1896					B-Actin	5	29.743	3.38618	10.4555	19.3914
7	2	33.9762	32.6119	33.2941					B-Actin	6	33.1896	-0.0604458	0.958968	1.77856	52.9518
8	2	34.7215	35.5884	35.155					B-Actin	7	33.2941	-0.164925	0.891975	1.65432
9	2	35.2701	33.7506	34.5104					B-Actin	8	35.155	-2.02582	0.245566	0.455443
10	2	31.9396	31.7434	31.8415					B-Actin	9	34.5104	-1.38125	0.383887	0.711982
11	2	30.3034	30.9041	30.6038					B-Actin	10	31.8415	1.28762	2.44126	4.52771
12	2	28.8454	29.4771	29.1613					B-Actin	11	30.6038	2.52538	5.75724	10.6778
									B-Actin	12	29.1613	3.96787	15.6476	29.021	47.0482
		34.7501											53.9181	100
									WT CID	B-Actin
809	Liver 40 WT CID			6 ul sample + 6 ul Water								ΔCT fraction x		% of mRNA in each fraction
B-Actin	Efficiency target	Target Ct 1	Target Ct 2	Target Ct					Target mRNA	Fraction Number	CT	CT (fraction 1) - CT (fraction x)	2^(ΔCT fraction x)	2^(ΔCT fraction x) * 100/Sum
1	2	32.9251	33.21	33.0675					B-Actin	1	33.0675	0	1	1.70148
2	2	31.668	32.1624	31.9152					B-Actin	2	31.9152	1.15234	2.22275	3.78197
3	2	31.1455	30.3249	30.7352					B-Actin	3	30.7352	2.33234	5.0362	8.56901
4	2	29.9098	30.4428	30.1763					B-Actin	4	30.1763	2.89122	7.41897	12.6232
5	2	30.1245	30.5122	30.3184					B-Actin	5	30.3184	2.74916	6.72328	11.4395
6	2	33.3001	31.7244	32.5122					B-Actin	6	32.5122	0.555308	1.46948	2.5003	40.6155
7	2	30.4334	30.9849	30.7092					B-Actin	7	30.7092	2.35837	5.12789	8.72501
8	2	31.3391	31.7546	31.5469					B-Actin	8	31.5469	1.52067	2.86924	4.88196
9	2	31.6057	31.2702	31.438					B-Actin	9	31.438	1.62955	3.09417	5.26468
10	2	30.3258	31.4782	30.902					B-Actin	10	30.902	2.16552	4.48629	7.63334
11	2	29.1283	29.4202	29.2743					B-Actin	11	29.2743	3.79327	13.864	23.5893
12	2	30.4824	30.7548	30.6186					B-Actin	12	30.6186	2.44891	5.46003	9.29014	59.3845
													58.7723	100
		34.7501
									HJV ND	B-Actin
												ΔCT fraction x		% of mRNA in each fraction
									Target mRNA	Fraction Number	CT	CT (fraction 1) - CT (fraction x)	2^(ΔCT fraction x)	2^(ΔCT fraction x) * 100/Sum
809	Liver 3 HJV ND			6 ul sample + 6 ul Water					B-Actin	1	33.9724	0	1	1.38507
B-Actin	Efficiency target	Target Ct 1	Target Ct 2	Target Ct					B-Actin	2	33.672	0.300388	1.23148	1.70568
1	2	34.2315	33.7132	33.9724					B-Actin	3	31.1652	2.80715	6.99903	9.69414
2	2	32.8245	34.5194	33.672					B-Actin	4	30.9249	3.04743	8.2674	11.4509
3	2	30.8623	31.4681	31.1652					B-Actin	5	31.4167	2.55565	5.87931	8.14326
4	2	30.9896	30.8602	30.9249					B-Actin	6	34.8789	-0.90654	0.533463	0.738883	33.1179
5	2	31.0898	31.7436	31.4167					B-Actin	7	33.968	0.00435829	1.00303	1.38926
6	2	35.3108	34.447	34.8789					B-Actin	8	33.3131	0.659266	1.57928	2.18741
7	2	33.5224	34.4136	33.968					B-Actin	9	33.4436	0.528784	1.44271	1.99826
8	2	33.3131	33.3131	33.3131					B-Actin	10	31.0269	2.94545	7.70316	10.6694
9	2	32.3577	34.5294	33.4436					B-Actin	11	29.9319	4.04043	16.4547	22.7909
10	2	31.252	30.8018	31.0269					B-Actin	12	29.6429	4.32948	20.105	27.8468	66.8821
11	2	29.8754	29.9884	29.9319									72.1986	100
12	2	29.5856	29.7002	29.6429
									HJV IDD	B-Actin
		34.7501										ΔCT fraction x		% of mRNA in each fraction
									Target mRNA	Fraction Number	CT	CT (fraction 1) - CT (fraction x)	2^(ΔCT fraction x)	2^(ΔCT fraction x) * 100/Sum
									B-Actin	1	34.4627	0	1	1.07396
									B-Actin	2	34.2033	0.259411	1.19699	1.28552
809	Liver 25 HJV IDD			6 ul sample + 6 ul Water					B-Actin	3	30.1721	4.29061	19.5705	21.0179
B-Actin	Efficiency target	Target Ct 1	Target Ct 2	Target Ct					B-Actin	4	30.9045	3.55829	11.7801	12.6514
1	2	33.6859	35.2396	34.4627					B-Actin	5	30.6963	3.76641	13.6082	14.6146
2	2	35.148	33.2587	34.2033					B-Actin	6	32.9805	1.48226	2.79387	3.00049	53.6438
3	2	30.174	30.1702	30.1721					B-Actin	7	32.1785	2.28429	4.87123	5.23149
4	2	30.9868	30.8221	30.9045					B-Actin	8	31.8576	2.60516	6.0846	6.5346
5	2	30.4962	30.8965	30.6963					B-Actin	9	33.3181	1.14462	2.21087	2.37438
6	2	32.508	33.4529	32.9805					B-Actin	10	32.3156	2.14716	4.42955	4.75714
7	2	32.6329	31.724	32.1785					B-Actin	11	30.6156	3.8471	14.391	15.4553
8	2	31.5064	32.2087	31.8576					B-Actin	12	30.9803	3.48241	11.1766	12.0032	46.3562
9	2	32.0807	34.5556	33.3181									93.1136	100
10	2	32.007	32.6242	32.3156
11	2	30.4806	30.7507	30.6156
12	2	30.9803	30.9803	30.9803
		34.7501
Combined fractions
Monosomes = 1-6	Polysomes = 7-12
FPN+/B-Actin	Efficiency target	Target Ct 1	Target Ct 2	Target Ct	Delta Ct target	Numerator	Efficiency refer.	Refer. Ct 1	Refer. Ct 2	Refer. Ct	Delta Ct refer.	Denominator	Fold Induction	FPN+/B-Actin		FPN+/B-Actin	Efficiency target	Target Ct 1	Target Ct 2	Target Ct	Delta Ct target	Numerator	Efficiency refer.	Refer. Ct 1	Refer. Ct 2	Refer. Ct	Delta Ct refer.	Denominator	Fold Induction	FPN+/B-Actin
17 Mono	2	31.279	31.2837	31.2813	0	1	2	31.4803	30.4934	30.9868	0	1	1	WT ND		17 Mono	2	31.279	31.2837	31.2813	0	1	2	31.4803	30.4934	30.9868	0	1	1	WT ND
17 Poly	2	32.5813	33.2338	32.9076	-1.62624	0.323932	2	31.5533	30.6969	31.1251	-0.138255	0.908617	0.356511	WT ND		17 Poly	2	32.5813	33.2338	32.9076	-1.62624	0.323932	2	31.5533	30.6969	31.1251	-0.138255	0.908617	0.356511	WT ND
40 Mono	2	30.9	31.2467	31.0733	0	1	2	30.6488	31.4904	31.0696	0	1	1	Wt CID		40 Mono	2	30.9	31.2467	31.0733	0.207998	1.15508	2	30.6488	31.4904	31.0696	-0.0827732	0.944241	1.22329	Wt CID
40 Poly	2	30.6108	29.7878	30.1993	0.874041	1.83279	2	30.0491	29.4159	29.7325	1.33714	2.52651	0.725424	Wt CID		40 Poly	2	30.6108	29.7878	30.1993	1.08204	2.11703	2	30.0491	29.4159	29.7325	1.25437	2.38563	0.887407	Wt CID
3 Mono	2	32.4467	31.6382	32.0424	0	1	2	32.6691	31.812	32.2405	0	1	1	KO ND		3 Mono	2	32.4467	31.6382	32.0424	-0.761085	0.590053	2	32.6691	31.812	32.2405	-1.25367	0.41938	1.40696	KO ND
3 Poly	2	30.9347	31.1528	31.0438	0.998629	1.9981	2	30.9102	32.1416	31.5259	0.714657	1.64109	1.21754	KO ND		3 Poly	2	30.9347	31.1528	31.0438	0.237544	1.17898	2	30.9102	32.1416	31.5259	-0.539012	0.688242	1.71304	KO ND
25 Mono	2	32.2746	31.5842	31.9294	0	1	2	30.8748	31.2789	31.0768	0	1	1	KO IDD		25 Mono	2	32.2746	31.5842	31.9294	-0.648053	0.638141	2	30.8748	31.2789	31.0768	-0.0899553	0.939552	0.679197	KO IDD
25 Poly	2	33.4309	33.4309	33.4309	-1.50148	0.353191	2	32.7793	32.8942	32.8367	-1.75994	0.29526	1.1962	KO IDD		25 Poly	2	33.4309	33.4309	33.4309	-2.14953	0.225386	2	32.7793	32.8942	32.8367	-1.8499	0.277412	0.812457	KO IDD
			36.3679						35.3286										36.3679						35.3286
FtH/B-Actin	Efficiency target	Target Ct 1	Target Ct 2	Target Ct	Delta Ct target	Numerator	Efficiency refer.	Refer. Ct 1	Refer. Ct 2	Refer. Ct	Delta Ct refer.	Denominator	Fold Induction	FtH/B-Actin		FtH/B-Actin	Efficiency target	Target Ct 1	Target Ct 2	Target Ct	Delta Ct target	Numerator	Efficiency refer.	Refer. Ct 1	Refer. Ct 2	Refer. Ct	Delta Ct refer.	Denominator	Fold Induction	FtH/B-Actin
17 Mono	2	26.0063	25.5685	25.7874	0	1	2	31.4803	30.4934	30.9868	0	1	1	WT ND		17 Mono	2	26.0063	25.5685	25.7874	0	1	2	31.4803	30.4934	30.9868	0	1	1	WT ND
17 Poly	2	29.4652	29.4516	29.4584	-3.67104	0.0785066	2	31.5533	30.6969	31.1251	-0.138255	0.908617	0.0864023	WT ND		17 Poly	2	29.4652	29.4516	29.4584	-3.67104	0.0785066	2	31.5533	30.6969	31.1251	-0.138255	0.908617	0.0864023	WT ND
40 Mono	2	27.0186	27.0768	27.0477	0	1	2	30.6488	31.4904	31.0696	0	1	1	Wt CID		40 Mono	2	27.0186	27.0768	27.0477	-1.26033	0.417449	2	30.6488	31.4904	31.0696	-0.0827732	0.944241	0.4421	Wt CID
40 Poly	2	27.6011	27.7047	27.6529	-0.605181	0.657389	2	30.0491	29.4159	29.7325	1.33714	2.52651	0.260197	Wt CID		40 Poly	2	27.6011	27.7047	27.6529	-1.86551	0.274427	2	30.0491	29.4159	29.7325	1.25437	2.38563	0.115033	Wt CID
3 Mono	2	28.9757	29.0973	29.0365	0	1	2	32.6691	31.812	32.2405	0	1	1	KO ND		3 Mono	2	28.9757	29.0973	29.0365	-3.24912	0.105176	2	32.6691	31.812	32.2405	-1.25367	0.41938	0.250789	KO ND
3 Poly	2	28.1232	28.1333	28.1283	0.908235	1.87675	2	30.9102	32.1416	31.5259	0.714657	1.64109	1.1436	KO ND		3 Poly	2	28.1232	28.1333	28.1283	-2.34089	0.197389	2	30.9102	32.1416	31.5259	-0.539012	0.688242	0.286801	KO ND
25 Mono	2	28.1261	28.1627	28.1444	0	1	2	30.8748	31.2789	31.0768	0	1	1	KO IDD		25 Mono	2	28.1261	28.1627	28.1444	-2.35704	0.195192	2	30.8748	31.2789	31.0768	-0.0899553	0.939552	0.20775	KO IDD
25 Poly	2	30.6203	30.5056	30.5629	-2.4185	0.18705	2	32.7793	32.8942	32.8367	-1.75994	0.29526	0.63351	KO IDD		25 Poly	2	30.6203	30.5056	30.5629	-4.77554	0.0365107	2	32.7793	32.8942	32.8367	-1.8499	0.277412	0.131612	KO IDD
			30.6289																30.6289
809	Liver 17 WT ND			6 ul sample + 6 ul Water					WT ND	B-Actin
FPN-IRE	Efficiency target	Target Ct 1	Target Ct 2	Target Ct								ΔCT fraction x		% of mRNA in each fraction
1	2	39.9254	35.9422	37.9338					Target mRNA	Fraction Number	CT	CT (fraction 1) - CT (fraction x)	2^(ΔCT fraction x)	2^(ΔCT fraction x) * 100/Sum
2	2	34.3236	34.6242	34.4739					B-Actin	1	37.9338	-4.80469	0.0357802	0.627942
3	2	34.9888	34.7357	34.8622					B-Actin	2	34.4739	-1.34475	0.393722	6.90981
4	2	33.9204	34.2353	34.0779					B-Actin	3	34.8622	-1.7331	0.300805	5.27911
5	2	32.8143	34.1195	33.4669					B-Actin	4	34.0779	-0.94873	0.518088	9.09243
6	2	32.4891	33.929	33.2091					B-Actin	5	33.4669	-0.337767	0.791265	13.8867
7	2	33.9059	34.4803	34.1931					B-Actin	6	33.2091	-0.0799236	0.946108	16.6042
8	2	37.068	35.5734	36.3207					B-Actin	7	34.1931	-1.06395	0.47832	8.3945
9	2	34.6085	33.5535	34.081					B-Actin	8	36.3207	-3.19153	0.10946	1.92101
10	2	34.2835	33.8253	34.0544					B-Actin	9	34.081	-0.951872	0.516961	9.07266
11	2	35.9413	35.9485	35.9449					B-Actin	10	34.0544	-0.925232	0.526596	9.24174
12	2	32.6471	33.7931	33.2201					B-Actin	11	35.9449	-2.81576	0.142027	2.49257
									B-Actin	12	33.2201	-0.0909824	0.938883	16.4774
		33.7558											5.69802	100
									WT CID	B-Actin
809	Liver 40 WT CID			6 ul sample + 6 ul Water								ΔCT fraction x		% of mRNA in each fraction
FPN-IRE	Efficiency target	Target Ct 1	Target Ct 2	Target Ct					Target mRNA	Fraction Number	CT	CT (fraction 1) - CT (fraction x)	2^(ΔCT fraction x)	2^(ΔCT fraction x) * 100/Sum
1	2	31.4277	34.3064	32.8671					B-Actin	1	32.8671	0.200473	1.14907	16.7889
2	2	34.2432	34.4668	34.355					B-Actin	2	34.355	-1.28746	0.409672	5.98563
3	2	33.0136	33.5773	33.2955					B-Actin	3	33.2955	-0.227932	0.853858	12.4756
4	2	35.0978	35.6144	35.3561					B-Actin	4	35.3561	-2.28858	0.204677	2.9905
5	2	33.1471	33.326	33.2365					B-Actin	5	33.2365	-0.169018	0.889448	12.9956
6	2	35.3298	34.2258	34.7778					B-Actin	6	34.7778	-1.71025	0.305607	4.46516
7	2	33.2249	35.7372	34.481					B-Actin	7	34.481	-1.41352	0.375395	5.48482
8	2	34.7606	32.453	33.6068					B-Actin	8	33.6068	-0.53924	0.688133	10.0542
9	2	34.3467	34.7617	34.5542					B-Actin	9	34.5542	-1.48667	0.356835	5.21365
10	2	32.9036	34.7267	33.8151					B-Actin	10	33.8151	-0.747623	0.595584	8.70196
11	2	35.6292	33.7261	34.6776					B-Actin	11	34.6776	-1.6101	0.327575	4.78613
12	2	32.8134	34.3991	33.6062					B-Actin	12	33.6062	-0.538704	0.688389	10.0579
													6.84425	100
		33.7558
									HJV ND	B-Actin
												ΔCT fraction x		% of mRNA in each fraction
									Target mRNA	Fraction Number	CT	CT (fraction 1) - CT (fraction x)	2^(ΔCT fraction x)	2^(ΔCT fraction x) * 100/Sum
809	Liver 3 HJV ND			6 ul sample + 6 ul Water					B-Actin	1	33.6891	0.283205	1.2169	10.4319
FPN-IRE	Efficiency target	Target Ct 1	Target Ct 2	Target Ct					B-Actin	2	33.4399	0.532417	1.44635	12.3989
1	2	33.4332	33.9451	33.6891					B-Actin	3	33.907	0.0653725	1.04636	8.96995
2	2	33.5476	33.3323	33.4399					B-Actin	4	34.0315	-0.0591278	0.959844	8.22833
3	2	34.3562	33.4578	33.907					B-Actin	5	34.2125	-0.240097	0.846688	7.2583
4	2	33.6512	34.4118	34.0315					B-Actin	6	34.7332	-0.760847	0.59015	5.0591
5	2	35.2299	33.195	34.2125					B-Actin	7	34.8873	-0.914906	0.530379	4.54671
6	2	34.3333	35.1331	34.7332					B-Actin	8	33.9238	0.0485229	1.03421	8.8658
7	2	36.0104	33.7641	34.8873					B-Actin	9	33.5084	0.463991	1.37935	11.8246
8	2	34.1884	33.6593	33.9238					B-Actin	10	34.94	-0.9676	0.511356	4.38364
9	2	32.905	34.1118	33.5084					B-Actin	11	33.9558	0.0165939	1.01157	8.67174
10	2	34.4033	35.4766	34.94					B-Actin	12	33.8454	0.126932	1.09197	9.36098
11	2	33.5073	34.4042	33.9558									11.6651	100
12	2	35.5446	32.1462	33.8454
									HJV IDD	B-Actin
		33.7558										ΔCT fraction x		% of mRNA in each fraction
									Target mRNA	Fraction Number	CT	CT (fraction 1) - CT (fraction x)	2^(ΔCT fraction x)	2^(ΔCT fraction x) * 100/Sum
									B-Actin	1	33.2624	1.20032	2.2979	17.1559
									B-Actin	2	34.7501	-0.287388	0.819384	6.11743
809	Liver 25 HJV IDD			6 ul sample + 6 ul Water					B-Actin	3	33.3745	1.08826	2.12618	15.8738
FPN-IRE	Efficiency target	Target Ct 1	Target Ct 2	Target Ct					B-Actin	4	34.3913	0.0714798	1.05079	7.84511
1	2	33.3362	33.1886	33.2624					B-Actin	5	34.667	-0.204206	0.868016	6.48051
2	2	34.6201	34.8802	34.7501					B-Actin	6	34.2961	0.166674	1.12247	8.38022
3	2	32.6627	34.0863	33.3745					B-Actin	7	34.4899	-0.0271263	0.981373	7.32682
4	2	34.4556	34.3269	34.3913					B-Actin	8	35.0236	-0.560852	0.677902	5.06114
5	2	34.6787	34.6552	34.667					B-Actin	9	34.359	0.103729	1.07455	8.02245
6	2	34.2131	34.379	34.2961					B-Actin	10	35.1893	-0.726582	0.604334	4.51189
7	2	33.5707	35.4091	34.4899					B-Actin	11	35.0903	-0.627594	0.647255	4.83233
8	2	34.5933	35.4538	35.0236					B-Actin	12	34.294	0.168766	1.1241	8.39238
9	2	33.7997	34.9183	34.359									13.3943	100
10	2	35.1893	35.1893	35.1893
11	2	35.0903	35.0903	35.0903
12	2	34.294	34.294	34.294
		33.7558

## Sheet: 809 Polysome Run 3
809	Liver 16 WT ND			6 ul sample + 6 ul Water
FPN+IRE	Efficiency target	Target Ct 1	Target Ct 2	Target Ct					WT ND	FPN
1	2	33.2926	32.9145	33.1035								ΔCT fraction x		% of mRNA in each fraction
2	2	34.0271	36.3364	35.1817					Target mRNA	Fraction Number	CT	CT (fraction 1) - CT (fraction x)	2^(ΔCT fraction x)	2^(ΔCT fraction x) * 100/Sum
3	2	29.755	29.7028	29.7289					Fpn	1	33.1035	0	1	1.89375
4	2	29.813	30.915	30.364					Fpn	2	35.1817	-2.07819	0.236812	0.448464
5	2	30.3886	29.6405	30.0145					Fpn	3	29.7289	3.37468	10.3724	19.6428
6	2	33.9548	33.2171	33.586					Fpn	4	30.364	2.73954	6.67858	12.6476
7	2	30.9426	31.3203	31.1314					Fpn	5	30.0145	3.08902	8.50915	16.1142
8	2	31.8273	31.8273	31.8273					Fpn	6	33.586	-0.482405	0.715784	1.35552	52.1023
9	2	31.2982	31.1975	31.2479					Fpn	7	31.1314	1.97212	3.92345	7.43005
10	2	31.4224	31.4224	31.4224					Fpn	8	31.8273	1.27622	2.42204	4.58674
11	2	31.6826	30.9168	31.2997					Fpn	9	31.2479	1.85567	3.61919	6.85386
12	2	29.562	30.4265	29.9943					Fpn	10	31.4224	1.68111	3.20675	6.07279
									Fpn	11	31.2997	1.80387	3.49156	6.61215
		32.858							Fpn	12	29.9943	3.10927	8.62946	16.3421	47.8977
													52.8052	100
809	Liver 42 WT CID			6 ul sample + 6 ul Water					WT CID	FPN
FPN+IRE	Efficiency target	Target Ct 1	Target Ct 2	Target Ct								ΔCT fraction x		% of mRNA in each fraction
1	2	33.9318	33.9318	33.9318					Target mRNA	Fraction Number	CT	CT (fraction 1) - CT (fraction x)	2^(ΔCT fraction x)	2^(ΔCT fraction x) * 100/Sum
2	2	36.6005	36.6005	36.6005					Fpn	1	36.6005	0	1	0.14553
3	2	34.178	34.178	34.178					Fpn	2	34.178	2.42257	5.36125	0.780222
4	2	34.3685	34.3204	34.3444					Fpn	3	34.3444	2.25611	4.77703	0.6952
5	2	33.5075	32.5447	33.0261					Fpn	4	33.0261	3.57441	11.9126	1.73364
6	2	29.8172	27.6093	28.7133					Fpn	5	28.7133	7.88727	236.757	34.4553
7	2	31.5565	31.5565	31.5565					Fpn	6	31.5565	5.04406	32.9924	4.80139	42.6112
8	2	30.7252	29.676	30.2006					Fpn	7	30.2006	6.39994	84.4448	12.2892
9	2	31.7333	31.7257	31.7295					Fpn	8	31.7295	4.87102	29.2633	4.25869
10	2	30.5112	31.4787	30.9949					Fpn	9	30.9949	5.60558	48.6909	7.08598
11	2	31.2427	29.6759	30.4593					Fpn	10	30.4593	6.14123	70.5819	10.2718
12	2	31.2176	29.5516	30.3846					Fpn	11	30.3846	6.21593	74.3328	10.8176
13	2	31.4856	28.8286	30.1571					Fpn	12	30.1571	6.44343	87.0296	12.6654	57.3888
													687.144	100
		34.4636
									HJV ND	FPN
												ΔCT fraction x		% of mRNA in each fraction
809	Liver 2 HJV ND			6 ul sample + 6 ul Water					Target mRNA	Fraction Number	CT	CT (fraction 1) - CT (fraction x)	2^(ΔCT fraction x)	2^(ΔCT fraction x) * 100/Sum
FPN+IRE	Efficiency target	Target Ct 1	Target Ct 2	Target Ct					Fpn	1	32.8831	0	1	0.669803
1	2	32.8831	32.8831	32.8831					Fpn	2	33.523	-0.639824	0.641791	0.429874
2	2	33.523	33.523	33.523					Fpn	3	29.2406	3.64249	12.4882	8.36463
3	2	29.7502	28.7311	29.2406					Fpn	4	29.4538	3.42939	10.7733	7.21597
4	2	29.6518	29.2557	29.4538					Fpn	5	29.0663	3.81684	14.0923	9.43908
5	2	29.3117	28.8209	29.0663					Fpn	6	32.9171	-0.0339699	0.976729	0.654216	26.7736
6	2	32.9171	32.9171	32.9171					Fpn	7	27.6579	5.22526	37.4077	25.0558
7	2	27.7961	27.5197	27.6579					Fpn	8	28.3516	4.53153	23.1274	15.4908
8	2	28.2118	28.4914	28.3516					Fpn	9	30.9136	1.96954	3.91642	2.62323
9	2	30.5886	31.2386	30.9136					Fpn	10	29.8132	3.0699	8.39715	5.62444
10	2	29.1699	30.4566	29.8132					Fpn	11	28.2565	4.62668	24.7041	16.5469
11	2	27.9525	28.5604	28.2565					Fpn	12	29.3258	3.55736	11.7726	7.8853	73.2264
12	2	29.2139	29.4376	29.3258									149.298	100
		32.858							HJV IDD	FPN
												ΔCT fraction x		% of mRNA in each fraction
									Target mRNA	Fraction Number	CT	CT (fraction 1) - CT (fraction x)	2^(ΔCT fraction x)	2^(ΔCT fraction x) * 100/Sum
									Fpn	1	33.6186	0	1	1.14932
809	Liver 24 HJV IDD			6 ul sample + 6 ul Water					Fpn	2	34.4365	-0.817917	0.56726	0.651965
FPN+IRE	Efficiency target	Target Ct 1	Target Ct 2	Target Ct					Fpn	3	29.9091	3.70942	13.0812	15.0345
1	2	34.3146	32.9225	33.6186					Fpn	4	29.7102	3.90831	15.0148	17.2568
2	2	34.4365	34.4365	34.4365					Fpn	5	30.0549	3.56361	11.8237	13.5893
3	2	29.9091	29.9091	29.9091					Fpn	6	29.6773	3.94121	15.3611	17.6548	65.3367
4	2	29.9158	29.5047	29.7102					Fpn	7	31.2187	2.39981	5.27733	6.06536
5	2	30.2388	29.8711	30.0549					Fpn	8	31.5815	2.03708	4.10415	4.71699
6	2	29.6773	29.6773	29.6773					Fpn	9	31.5835	2.03509	4.09848	4.71047
7	2	31.2187	31.2187	31.2187					Fpn	10	31.3093	2.30927	4.95632	5.69641
8	2	30.1925	32.9704	31.5815					Fpn	11	30.9066	2.71191	6.55187	7.53021
9	2	32.8731	30.2938	31.5835					Fpn	12	31.2479	2.37061	5.17159	5.94383	34.6633
10	2	31.3093	31.3093	31.3093									87.0078	100
11	2	31.336	30.4773	30.9066
12	2	31.1808	31.3151	31.2479
		32.858
809	Liver 16 WT ND			6 ul sample + 6 ul Water					WT ND	Ferritin-H
Ferritin-H	Efficiency target	Target Ct 1	Target Ct 2	Target Ct								ΔCT fraction x		% of mRNA in each fraction
1	2	31.663	31.4259	31.5444					Target mRNA	Fraction Number	CT	CT (fraction 1) - CT (fraction x)	2^(ΔCT fraction x)	2^(ΔCT fraction x) * 100/Sum
2	2	32.1422	31.4731	31.8077					Ferritin-H	1	31.5444	0	1	6.39015
3	2	30.1146	30.4628	30.2887					Ferritin-H	2	31.8077	-0.263264	0.833201	5.32428
4	2	30.8969	30.6538	30.7754					Ferritin-H	3	30.2887	1.2557	2.38784	15.2586
5	2	31.5287	30.5604	31.0445					Ferritin-H	4	30.7754	0.769053	1.70415	10.8898
6	2	31.6798	31.3074	31.4936					Ferritin-H	5	31.0445	0.499892	1.41411	9.03637
7	2	31.4798	31.2418	31.3608					Ferritin-H	6	31.4936	0.0508337	1.03586	6.61933
8	2	31.5831	32.2048	31.894					Ferritin-H	7	31.3608	0.183626	1.13573	7.25752
9	2	31.399	31.3784	31.3887					Ferritin-H	8	31.894	-0.349554	0.784827	5.01516
10	2	30.9682	30.514	30.7411					Ferritin-H	9	31.3887	0.155684	1.11395	7.11831
11	2	30.5922	30.9268	30.7595					Ferritin-H	10	30.7411	0.80333	1.74513	11.1516
12	2	30.5204	33.3177	31.919					Ferritin-H	11	30.7595	0.784896	1.72297	11.01
									Ferritin-H	12	31.919	-0.374614	0.771312	4.9288
		31.3665											15.6491	100
									WT CID	Ferritin-H
809	Liver 42 WT CID			6 ul sample + 6 ul Water								ΔCT fraction x		% of mRNA in each fraction
Ferritin-H	Efficiency target	Target Ct 1	Target Ct 2	Target Ct					Target mRNA	Fraction Number	CT	CT (fraction 1) - CT (fraction x)	2^(ΔCT fraction x)	2^(ΔCT fraction x) * 100/Sum
1	2			#DIV/0!					Ferritin-H	1	31.0842	0	1
2	2			#DIV/0!					Ferritin-H	2	31.7703	-0.686088	0.621537
3	2			#DIV/0!					Ferritin-H	3	29.6846	1.39954	2.63817
4	2			#DIV/0!					Ferritin-H	4	30.7827	0.301489	1.23242
5	2			#DIV/0!					Ferritin-H	5	30.6977	0.386513	1.30723
6	2			#DIV/0!					Ferritin-H	6	32.0738	-0.989631	0.503607
7	2			#DIV/0!					Ferritin-H	7	29.1706	1.9136	3.76747
8	2			#DIV/0!					Ferritin-H	8	28.6781	2.40612	5.30048
9	2			#DIV/0!					Ferritin-H	9	29.316	1.76822	3.40632
10	2			#DIV/0!					Ferritin-H	10	28.0379	3.04632	8.26103
11	2			#DIV/0!					Ferritin-H	11	26.9944	4.08974	17.0268
12	2			#DIV/0!					Ferritin-H	12	27.6282	3.45599	10.9738
													56.0389	0
		31.3665
									HJV ND	Ferritin-H
												ΔCT fraction x		% of mRNA in each fraction
									Target mRNA	Fraction Number	CT	CT (fraction 1) - CT (fraction x)	2^(ΔCT fraction x)	2^(ΔCT fraction x) * 100/Sum
809	Liver 2 HJV ND			6 ul sample + 6 ul Water					Ferritin-H	1	31.0842	0	1	1.78448
Ferritin-H	Efficiency target	Target Ct 1	Target Ct 2	Target Ct					Ferritin-H	2	31.7703	-0.686088	0.621537	1.10912
1	2	31.3062	30.8621	31.0842					Ferritin-H	3	29.6846	1.39954	2.63817	4.70775
2	2	31.6922	31.8483	31.7703					Ferritin-H	4	30.7827	0.301489	1.23242	2.19922
3	2	29.8349	29.5344	29.6846					Ferritin-H	5	30.6977	0.386513	1.30723	2.33272
4	2	30.6779	30.8875	30.7827					Ferritin-H	6	32.0738	-0.989631	0.503607	0.898674
5	2	30.6825	30.7128	30.6977					Ferritin-H	7	29.1706	1.9136	3.76747	6.72296
6	2	32.0012	32.1464	32.0738					Ferritin-H	8	28.6781	2.40612	5.30048	9.45857
7	2	29.2025	29.1386	29.1706					Ferritin-H	9	29.316	1.76822	3.40632	6.0785
8	2	28.7935	28.5626	28.6781					Ferritin-H	10	28.0379	3.04632	8.26103	14.7416
9	2	29.4192	29.2127	29.316					Ferritin-H	11	26.9944	4.08974	17.0268	30.3839
10	2	28.0188	28.057	28.0379					Ferritin-H	12	27.6282	3.45599	10.9738	19.5825
11	2	26.8793	27.1096	26.9944									56.0389	100
12	2	27.6748	27.5816	27.6282
									HJV IDD	Ferritin-H
		31.3665										ΔCT fraction x		% of mRNA in each fraction
									Target mRNA	Fraction Number	CT	CT (fraction 1) - CT (fraction x)	2^(ΔCT fraction x)	2^(ΔCT fraction x) * 100/Sum
									Ferritin-H	1	31.4991	0	1	5.02106
									Ferritin-H	2	32.1792	-0.68013	0.624109	3.13369
809	Liver 24 HJV IDD			6 ul sample + 6 ul Water					Ferritin-H	3	31.0362	0.462841	1.37825	6.92029
Ferritin-H	Efficiency target	Target Ct 1	Target Ct 2	Target Ct					Ferritin-H	4	30.8065	0.692543	1.61613	8.11468
1	2	31.7749	31.4991	31.637					Ferritin-H	5	31.08	0.419077	1.33707	6.71352
2	2	31.8213	32.1792	32.0002					Ferritin-H	6	31.2941	0.205004	1.15269	5.78772
3	2	31.1126	31.0362	31.0744					Ferritin-H	7	31.147	0.352036	1.27636	6.40868
4	2	30.8183	30.8065	30.8124					Ferritin-H	8	30.9422	0.556864	1.47107	7.38632
5	2	30.9842	31.08	31.0321					Ferritin-H	9	30.829	0.670088	1.59117	7.98936
6	2	31.4564	31.2941	31.3752					Ferritin-H	10	30.7482	0.750883	1.68282	8.44955
7	2	30.9325	31.147	31.0398					Ferritin-H	11	29.4382	2.06085	4.17233	20.9495
8	2	30.7559	30.9422	30.8491					Ferritin-H	12	30.1128	1.38633	2.61412	13.1257
9	2	31.245	30.829	31.037									19.9161	100
10	2	30.4124	30.7482	30.5803
11	2	29.5273	29.4382	29.4828
12	2	30.2112	30.1128	30.162
		35.9296
809	Liver 16 WT ND			6 ul sample + 6 ul Water					WT ND	B-Actin
B-Actin	Efficiency target	Target Ct 1	Target Ct 2	Target Ct								ΔCT fraction x		% of mRNA in each fraction
1	2	36.2786	33.5423	34.9104					Target mRNA	Fraction Number	CT	CT (fraction 1) - CT (fraction x)	2^(ΔCT fraction x)	2^(ΔCT fraction x) * 100/Sum
2	2	35.6679	33.7686	34.7182					B-Actin	1	34.9104	0	1	0.2498
3	2	29.7337	29.9285	29.8311					B-Actin	2	34.7182	0.1922	1.1425	0.285398
4	2	31.4558	30.6771	31.0665					B-Actin	3	29.8311	5.07934	33.8092	8.44553
5	2	28.9592	30.7795	29.8693					B-Actin	4	31.0665	3.84399	14.3601	3.58715
6	2	29.2774	29.6976	29.4875					B-Actin	5	29.8693	5.04111	32.9251	8.22468
7	2	27.9466	28.2784	28.1125					B-Actin	6	29.4875	5.42296	42.9016	10.7168	31.5094
8	2	33.1315	31.6176	32.3745					B-Actin	7	28.1125	6.79792	111.27	27.7953
9	2	28.9124	29.5929	29.2526					B-Actin	8	32.3745	2.53592	5.79945	1.4487
10	2	29.9699	30.1088	30.0393					B-Actin	9	29.2526	5.65781	50.4861	12.6114
11	2	29.0134	28.8542	28.9338					B-Actin	10	30.0393	4.87111	29.2652	7.31044
12	2	31.6364	30.4908	31.0636					B-Actin	11	28.9338	5.97665	62.9726	15.7305
									B-Actin	12	31.0636	3.84684	14.3885	3.59424	68.4906
		33.2175											400.32	100
									WT CID	B-Actin
809	Liver 42 WT CID			6 ul sample + 6 ul Water								ΔCT fraction x		% of mRNA in each fraction
B-Actin	Efficiency target	Target Ct 1	Target Ct 2	Target Ct					Target mRNA	Fraction Number	CT	CT (fraction 1) - CT (fraction x)	2^(ΔCT fraction x)	2^(ΔCT fraction x) * 100/Sum
1	2	31.5958	31.4515	31.5237					B-Actin	1	31.5237	0	1	2.39166
2	2	32.9126	30.9099	31.9113					B-Actin	2	31.9113	-0.387588	0.764407	1.8282
3	2	30.5872	30.5872	30.5872					B-Actin	3	30.5872	0.936439	1.9138	4.57716
4	2	31.7642	31.7642	31.7642					B-Actin	4	31.7642	-0.240554	0.84642	2.02435
5	2	30.7199	30.7199	30.7199					B-Actin	5	30.7199	0.803761	1.74565	4.175
6	2	28.9561	28.9561	28.9561					B-Actin	6	28.9561	2.5676	5.92824	14.1784	29.1747
7	2	31.518	30.0235	30.7707					B-Actin	7	30.7707	0.752949	1.68523	4.03051
8	2	32.7571	30.1188	31.4379					B-Actin	8	31.4379	0.085741	1.06123	2.53811
9	2	30.6616	30.6616	30.6616					B-Actin	9	30.6616	0.862081	1.81766	4.34723
10	2	30.2985	30.881	30.5897					B-Actin	10	30.5897	0.933929	1.91047	4.56921
11	2	28.8235	28.4655	28.6445					B-Actin	11	28.6445	2.87915	7.35717	17.5959
12	2	27.4596	27.6274	27.5435					B-Actin	12	27.5435	3.98017	15.7816	37.7443	70.8253
13	2	26.5776	25.7002	26.1389									41.8119	100
		31.3881							HJV ND	B-Actin
												ΔCT fraction x		% of mRNA in each fraction
									Target mRNA	Fraction Number	CT	CT (fraction 1) - CT (fraction x)	2^(ΔCT fraction x)	2^(ΔCT fraction x) * 100/Sum
809	Liver 2 HJV ND			6 ul sample + 6 ul Water					B-Actin	1	32.4992	0	1	1.5091
B-Actin	Efficiency target	Target Ct 1	Target Ct 2	Target Ct					B-Actin	2	35.1169	-2.61768	0.16293	0.245878
1	2	31.6576	33.3408	32.4992					B-Actin	3	30.7146	1.78465	3.44536	5.1994
2	2	35.2637	34.97	35.1169					B-Actin	4	31.4772	1.02201	2.03074	3.0646
3	2	31.5182	29.9109	30.7146					B-Actin	5	30.6993	1.79993	3.48204	5.25476
4	2	31.5689	31.3855	31.4772					B-Actin	6	33.2624	-0.763212	0.589183	0.889137	16.1629
5	2	29.8435	31.555	30.6993					B-Actin	7	29.8007	2.69847	6.49113	9.79578
6	2	34.1173	32.4075	33.2624					B-Actin	8	30.7674	1.73181	3.32144	5.01239
7	2	28.6374	30.9641	29.8007					B-Actin	9	31.7645	0.734663	1.66401	2.51116
8	2	30.8022	30.7326	30.7674					B-Actin	10	30.0164	2.4828	5.58981	8.4356
9	2	31.8592	31.6699	31.7645					B-Actin	11	28.3153	4.18388	18.175	27.4279
10	2	29.7542	30.2786	30.0164					B-Actin	12	28.1549	4.34433	20.3129	30.6543	83.8371
11	2	28.3636	28.267	28.3153									66.2646	100
12	2	28.1621	28.1476	28.1549
									HJV IDD	B-Actin
		34.7501										ΔCT fraction x		% of mRNA in each fraction
									Target mRNA	Fraction Number	CT	CT (fraction 1) - CT (fraction x)	2^(ΔCT fraction x)	2^(ΔCT fraction x) * 100/Sum
									B-Actin	1	36.5089	0	1	0.463111
									B-Actin	2	34.7102	1.79867	3.479	1.61116
809	Liver 24 HJV IDD			6 ul sample + 6 ul Water					B-Actin	3	35.2673	1.24156	2.36453	1.09504
B-Actin	Efficiency target	Target Ct 1	Target Ct 2	Target Ct					B-Actin	4	33.714	2.79484	6.93956	3.21378
1	2	36.2534	36.7643	36.5089					B-Actin	5	31.5365	4.97237	31.3929	14.5384
2	2	34.5278	34.8926	34.7102					B-Actin	6	31.8432	4.6657	25.3815	11.7544	32.6759
3	2	33.4523	37.0823	35.2673					B-Actin	7	32.2246	4.28421	19.4839	9.0232
4	2	34.5757	32.8523	33.714					B-Actin	8	32.3222	4.18668	18.2102	8.43335
5	2	31.1192	31.9538	31.5365					B-Actin	9	32.346	4.16287	17.9122	8.29535
6	2	28.3015	35.3848	31.8432					B-Actin	10	33.3395	3.16932	8.99621	4.16624
7	2	32.9824	31.4669	32.2246					B-Actin	11	30.6551	5.85375	57.8301	26.7817
8	2	32.8178	31.8266	32.3222					B-Actin	12	31.989	4.51985	22.9409	10.6242	67.3241
9	2	35.3581	29.3338	32.346									215.931	100
10	2	32.7453	33.9338	33.3395
11	2	30.7957	30.5145	30.6551
12	2	32.0115	31.9665	31.989
		34.7501
Combined fractions
Monosomes = 1-6	Polysomes = 7-12
FPN+/B-Actin	Efficiency target	Target Ct 1	Target Ct 2	Target Ct	Delta Ct target	Numerator	Efficiency refer.	Refer. Ct 1	Refer. Ct 2	Refer. Ct	Delta Ct refer.	Denominator	Fold Induction	FPN+/B-Actin
17 Mono	2			#DIV/0!	#DIV/0!	#DIV/0!	2			#DIV/0!	#DIV/0!	#DIV/0!	#DIV/0!	WT ND
17 Poly	2			#DIV/0!	#DIV/0!	#DIV/0!	2			#DIV/0!	#DIV/0!	#DIV/0!	#DIV/0!	WT ND
40 Mono	2			#DIV/0!	#DIV/0!	#DIV/0!	2			#DIV/0!	#DIV/0!	#DIV/0!	#DIV/0!	Wt CID
40 Poly	2			#DIV/0!	#DIV/0!	#DIV/0!	2			#DIV/0!	#DIV/0!	#DIV/0!	#DIV/0!	Wt CID
3 Mono	2			#DIV/0!	#DIV/0!	#DIV/0!	2			#DIV/0!	#DIV/0!	#DIV/0!	#DIV/0!	KO ND
3 Poly	2			#DIV/0!	#DIV/0!	#DIV/0!	2			#DIV/0!	#DIV/0!	#DIV/0!	#DIV/0!	KO ND
25 Mono	2			#DIV/0!	#DIV/0!	#DIV/0!	2			#DIV/0!	#DIV/0!	#DIV/0!	#DIV/0!	KO IDD
25 Poly	2			#DIV/0!	#DIV/0!	#DIV/0!	2			#DIV/0!	#DIV/0!	#DIV/0!	#DIV/0!	KO IDD
			36.3679						35.3286
FtH/B-Actin	Efficiency target	Target Ct 1	Target Ct 2	Target Ct	Delta Ct target	Numerator	Efficiency refer.	Refer. Ct 1	Refer. Ct 2	Refer. Ct	Delta Ct refer.	Denominator	Fold Induction	FtH/B-Actin
17 Mono	2			#DIV/0!	#DIV/0!	#DIV/0!	2			#DIV/0!	#DIV/0!	#DIV/0!	#DIV/0!	WT ND
17 Poly	2			#DIV/0!	#DIV/0!	#DIV/0!	2			#DIV/0!	#DIV/0!	#DIV/0!	#DIV/0!	WT ND
40 Mono	2			#DIV/0!	#DIV/0!	#DIV/0!	2			#DIV/0!	#DIV/0!	#DIV/0!	#DIV/0!	Wt CID
40 Poly	2			#DIV/0!	#DIV/0!	#DIV/0!	2			#DIV/0!	#DIV/0!	#DIV/0!	#DIV/0!	Wt CID
3 Mono	2			#DIV/0!	#DIV/0!	#DIV/0!	2			#DIV/0!	#DIV/0!	#DIV/0!	#DIV/0!	KO ND
3 Poly	2			#DIV/0!	#DIV/0!	#DIV/0!	2			#DIV/0!	#DIV/0!	#DIV/0!	#DIV/0!	KO ND
25 Mono	2			#DIV/0!	#DIV/0!	#DIV/0!	2			#DIV/0!	#DIV/0!	#DIV/0!	#DIV/0!	KO IDD
25 Poly	2			#DIV/0!	#DIV/0!	#DIV/0!	2			#DIV/0!	#DIV/0!	#DIV/0!	#DIV/0!	KO IDD
			30.6289

## Sheet: 809 Polysome Run 4
809	Liver 15 WT ND			6 ul sample + 6 ul Water
FPN+IRE	Efficiency target	Target Ct 1	Target Ct 2	Target Ct					WT ND	FPN
1	2	33.6712	33.6712	33.6712								ΔCT fraction x		% of mRNA in each fraction
2	2	33.738	33.6758	33.7069					Target mRNA	Fraction Number	CT	CT (fraction 1) - CT (fraction x)	2^(ΔCT fraction x)	2^(ΔCT fraction x) * 100/Sum
3	2	39.3386	39.0503	39.1944					Fpn	1	33.6712	0	1	1.84143
4	2	31.4091	30.8842	31.1466					Fpn	2	33.7069	-0.0356941	0.975562	1.79643
5	2	30.6084	30.4091	30.5087					Fpn	3	39.1944	-5.52324	0.021744	0.0400399
6	2	35.6192	35.6192	35.6192					Fpn	4	31.1466	2.52455	5.75393	10.5954
7	2	30.7997	30.7997	30.7997					Fpn	5	30.5087	3.16247	8.95362	16.4874
8	2	35.355	34.2052	34.7801					Fpn	6	35.6192	-1.94799	0.259177	0.477255	31.238
9	2	29.6346	30.2117	29.9231					Fpn	7	30.7997	2.87154	7.31845	13.4764
10	2	30.6529	29.7562	30.2045					Fpn	8	34.7801	-1.10892	0.463642	0.853763
11	2	35.2451	34.6249	34.935					Fpn	9	29.9231	3.74804	13.4361	24.7416
12	2	33.9645	28.9423	31.4534					Fpn	10	30.2045	3.46665	11.0551	20.3572
13	2	29.6897	31.2068	30.4482					Fpn	11	34.935	-1.26381	0.416441	0.766846
									Fpn	12	31.4534	2.21783	4.65193	8.56619	68.762
		32.4071											54.3057	100
809	Liver 41 WT CID			6 ul sample + 6 ul Water					WT CID	FPN
FPN+IRE	Efficiency target	Target Ct 1	Target Ct 2	Target Ct								ΔCT fraction x		% of mRNA in each fraction
1	2	31.6311	31.6311	31.6311					Target mRNA	Fraction Number	CT	CT (fraction 1) - CT (fraction x)	2^(ΔCT fraction x)	2^(ΔCT fraction x) * 100/Sum
2	2	32.3457	32.3457	32.3457					Fpn	1	31.6311	0	1	3.54789
3	2	34.7119	34.7119	34.7119					Fpn	2	32.3457	-0.714647	0.609354	2.16192
4	2	32.2318	31.8394	32.0356					Fpn	3	34.7119	-3.08087	0.118186	0.41931
5	2	29.3827	28.8039	29.0933					Fpn	4	32.0356	-0.404572	0.75546	2.68029
6	2	31.017	32.7566	31.8868					Fpn	5	29.0933	2.53779	5.807	20.6026
7	2	33.2486	33.2486	33.2486					Fpn	6	31.8868	-0.25572	0.837569	2.9716	32.3836
8	2	29.3668	29.5892	29.478					Fpn	7	33.2486	-1.61748	0.325904	1.15627
9	2	30.42	29.7077	30.0639					Fpn	8	29.478	2.15309	4.44778	15.7802
10	2	29.0308	29.456	29.2434					Fpn	9	30.0639	1.56721	2.96331	10.5135
11	2	30.8397	31.3712	31.1054					Fpn	10	29.2434	2.38771	5.23327	18.5671
12	2	28.9037	29.9251	29.4144					Fpn	11	31.1054	0.525626	1.43956	5.1074
									Fpn	12	29.4144	2.21672	4.64836	16.4919	67.6164
		32.4071											28.1858	100
									HJV ND	FPN
												ΔCT fraction x		% of mRNA in each fraction
809	Liver 1 HJV ND			6 ul sample + 6 ul Water					Target mRNA	Fraction Number	CT	CT (fraction 1) - CT (fraction x)	2^(ΔCT fraction x)	2^(ΔCT fraction x) * 100/Sum
FPN+IRE	Efficiency target	Target Ct 1	Target Ct 2	Target Ct					Fpn	1	36.7457	0	1	0.108304
1	2	36.7457	36.7457	36.7457					Fpn	2	34.5008	2.2449	4.74005	0.513368
2	2	34.5008	34.5008	34.5008					Fpn	3	30.3678	6.37786	83.1627	9.00688
3	2	30.3678	30.3678	30.3678					Fpn	4	30.2706	6.47506	88.9585	9.63459
4	2	30.4752	30.066	30.2706					Fpn	5	31.9392	4.80641	27.9816	3.03053
5	2	31.9392	31.9392	31.9392					Fpn	6	30.5908	6.15486	71.252	7.71689	30.0106
6	2	30.5908	30.5908	30.5908					Fpn	7	32.7453	4.00037	16.0041	1.73331
7	2	32.7373	32.7532	32.7453					Fpn	8	30.7561	5.98952	63.5369	6.88132
8	2	30.8255	30.6868	30.7561					Fpn	9	29.4246	7.32105	159.903	17.3181
9	2	29.2461	29.6031	29.4246					Fpn	10	29.0829	7.66277	202.639	21.9467
10	2	29.2771	28.8887	29.0829					Fpn	11	29.8272	6.91842	120.963	13.1008
11	2	30.2411	29.4133	29.8272					Fpn	12	30.3674	6.37822	83.1834	9.00912	69.9894
12	2	29.8554	30.8794	30.3674									923.324	100
		32.4071							HJV IDD	FPN
												ΔCT fraction x		% of mRNA in each fraction
									Target mRNA	Fraction Number	CT	CT (fraction 1) - CT (fraction x)	2^(ΔCT fraction x)	2^(ΔCT fraction x) * 100/Sum
									Fpn	1	33.468	0	1	2.14464
809	Liver 23 HJV IDD			6 ul sample + 6 ul Water					Fpn	2	33.7614	-0.293346	0.816007	1.75004
FPN+IRE	Efficiency target	Target Ct 1	Target Ct 2	Target Ct					Fpn	3	34.1969	-0.728882	0.603371	1.29401
1	2	33.468	33.468	33.468					Fpn	4	29.4447	4.02335	16.261	34.874
2	2	33.7614	33.7614	33.7614					Fpn	5	30.3145	3.1535	8.89813	19.0832
3	2	34.1969	34.1969	34.1969					Fpn	6	33.5104	-0.0423813	0.971051	2.08255	61.2285
4	2	29.4447	29.4447	29.4447					Fpn	7	30.9304	2.53766	5.80645	12.4527
5	2	30.6883	29.9408	30.3145					Fpn	8	31.024	2.44407	5.44173	11.6705
6	2	33.5104	33.5104	33.5104					Fpn	9	32.2143	1.25379	2.38467	5.11425
7	2	31.4107	30.4501	30.9304					Fpn	10	35.6549	-2.1869	0.219623	0.471012
8	2	30.4607	31.5872	31.024					Fpn	11	34.6959	-1.22784	0.426957	0.915668
9	2	33.1717	31.2568	32.2143					Fpn	12	31.5424	1.9256	3.79895	8.14736	38.7715
10	2	32.8421	38.4678	35.6549									46.628	100
11	2	35.6249	33.7669	34.6959
12	2	32.3246	30.7603	31.5424
		34.4636
809	Liver 15 WT ND			6 ul sample + 6 ul Water					WT ND	Ferritin-H
Ferritin-H	Efficiency target	Target Ct 1	Target Ct 2	Target Ct								ΔCT fraction x		% of mRNA in each fraction
1	2	33.0126	33.3213	33.1669					Target mRNA	Fraction Number	CT	CT (fraction 1) - CT (fraction x)	2^(ΔCT fraction x)	2^(ΔCT fraction x) * 100/Sum
2	2	32.8815	32.8634	32.8725					Ferritin-H	1	33.1669	0	1	2.35958
3	2	32.0874	32.1716	32.1295					Ferritin-H	2	32.8725	0.294441	1.22641	2.89381
4	2	30.8746	30.4817	30.6782					Ferritin-H	3	32.1295	1.03742	2.05256	4.84317
5	2	30.4149	30.9271	30.671					Ferritin-H	4	30.6782	2.48878	5.61304	13.2444
6	2	31.0458	31.029	31.0374					Ferritin-H	5	30.671	2.49595	5.64098	13.3104
7	2	31.3685	31.5156	31.4421					Ferritin-H	6	31.0374	2.12952	4.37571	10.3249	46.9762
8	2	30.836	30.3364	30.5862					Ferritin-H	7	31.4421	1.72488	3.30554	7.79968
9	2	30.9966	31.6344	31.3155					Ferritin-H	8	30.5862	2.58077	5.9826	14.1164
10	2	30.659	31.1623	30.9107					Ferritin-H	9	31.3155	1.85145	3.60864	8.51487
11	2	32.6834	33.2094	32.9464					Ferritin-H	10	30.9107	2.25624	4.77745	11.2728
12	2	31.2131	31.399	31.3061					Ferritin-H	11	32.9464	0.220551	1.16518	2.74933
									Ferritin-H	12	31.3061	1.86089	3.63231	8.57073	53.0238
		33.6448											42.3804	100
									WT CID	Ferritin-H
809	Liver 41 WT CID			6 ul sample + 6 ul Water								ΔCT fraction x		% of mRNA in each fraction
Ferritin-H	Efficiency target	Target Ct 1	Target Ct 2	Target Ct					Target mRNA	Fraction Number	CT	CT (fraction 1) - CT (fraction x)	2^(ΔCT fraction x)	2^(ΔCT fraction x) * 100/Sum
1	2	32.9629	32.9355	32.9492					Ferritin-H	1	32.9492	0	1	2.88883
2	2	33.0712	32.9602	33.0157					Ferritin-H	2	33.0157	-0.0665035	0.95495	2.75869
3	2	33.1702	33.0906	33.1304					Ferritin-H	3	33.1304	-0.181171	0.881987	2.54791
4	2	31.116	31.3138	31.2149					Ferritin-H	4	31.2149	1.73431	3.3272	9.61171
5	2	31.1916	31.2378	31.2147					Ferritin-H	5	31.2147	1.73451	3.32765	9.61302
6	2	31.4659	31.7204	31.5932					Ferritin-H	6	31.5932	1.35604	2.55982	7.39488	34.815
7	2	31.8437	32.0447	31.9442					Ferritin-H	7	31.9442	1.00503	2.00698	5.79783
8	2	30.5813	30.6202	30.6007					Ferritin-H	8	30.6007	2.3485	5.09296	14.7127
9	2	31.2408	31.0986	31.1697					Ferritin-H	9	31.1697	1.77954	3.43317	9.91784
10	2	31.0402	31.2886	31.1644					Ferritin-H	10	31.1644	1.78483	3.44579	9.95428
11	2	31.3806	31.8159	31.5982					Ferritin-H	11	31.5982	1.35098	2.55084	7.36895
12	2	30.4943	30.2176	30.3559					Ferritin-H	12	30.3559	2.5933	6.03476	17.4334	65.185
													34.6161	100
		33.6448
									HJV ND	Ferritin-H
												ΔCT fraction x		% of mRNA in each fraction
									Target mRNA	Fraction Number	CT	CT (fraction 1) - CT (fraction x)	2^(ΔCT fraction x)	2^(ΔCT fraction x) * 100/Sum
809	Liver 1 HJV ND			6 ul sample + 6 ul Water					Ferritin-H	1	33.6011	0	1	1.89515
Ferritin-H	Efficiency target	Target Ct 1	Target Ct 2	Target Ct					Ferritin-H	2	33.398	0.20303	1.15111	2.18153
1	2	33.6609	33.5412	33.6011					Ferritin-H	3	32.4333	1.16782	2.24672	4.25786
2	2	33.4426	33.3535	33.398					Ferritin-H	4	31.9319	1.66912	3.18021	6.02696
3	2	32.3232	32.5433	32.4333					Ferritin-H	5	32.5056	1.09547	2.13682	4.0496
4	2	32.2531	31.6108	31.9319					Ferritin-H	6	32.5442	1.05687	2.08041	3.94269	22.3538
5	2	32.6821	32.3291	32.5056					Ferritin-H	7	32.859	0.742115	1.67263	3.16987
6	2	32.5355	32.5529	32.5442					Ferritin-H	8	31.9598	1.64125	3.11937	5.91166
7	2	32.9745	32.7434	32.859					Ferritin-H	9	31.0123	2.5888	6.016	11.4012
8	2	32.3316	31.588	31.9598					Ferritin-H	10	30.3938	3.20729	9.23616	17.5039
9	2	31.0883	30.9362	31.0123					Ferritin-H	11	30.6911	2.91	7.51618	14.2443
10	2	30.5526	30.235	30.3938					Ferritin-H	12	29.8558	3.74532	13.4108	25.4153	77.6462
11	2	30.5102	30.872	30.6911									52.7664	100
12	2	29.7964	29.9151	29.8558
									HJV IDD	Ferritin-H
		33.6448										ΔCT fraction x		% of mRNA in each fraction
									Target mRNA	Fraction Number	CT	CT (fraction 1) - CT (fraction x)	2^(ΔCT fraction x)	2^(ΔCT fraction x) * 100/Sum
									Ferritin-H	1	32.7858	0	1	4.75488
									Ferritin-H	2	33.0113	-0.225513	0.855291	4.0668
809	Liver 23 HJV IDD			6 ul sample + 6 ul Water					Ferritin-H	3	33.1412	-0.355339	0.781686	3.71682
Ferritin-H	Efficiency target	Target Ct 1	Target Ct 2	Target Ct					Ferritin-H	4	31.3682	1.41762	2.67144	12.7024
1	2	32.7777	32.7939	32.7858					Ferritin-H	5	30.8484	1.93742	3.83021	18.2122
2	2	33.0958	32.9269	33.0113					Ferritin-H	6	31.7485	1.03732	2.0524	9.75893	53.212
3	2	33.2381	33.0442	33.1412					Ferritin-H	7	32.7352	0.0506458	1.03573	4.92476
4	2	31.5221	31.2143	31.3682					Ferritin-H	8	31.9821	0.803673	1.74554	8.29983
5	2	31.0676	30.6292	30.8484					Ferritin-H	9	32.2093	0.576528	1.49126	7.09074
6	2	31.5492	31.9478	31.7485					Ferritin-H	10	31.9985	0.787308	1.72585	8.20621
7	2	32.7274	32.743	32.7352					Ferritin-H	11	32.186	0.599806	1.51551	7.20608
8	2	32.009	31.9553	31.9821					Ferritin-H	12	31.5679	1.21792	2.32611	11.0604	46.788
9	2	32.4366	31.982	32.2093									21.031	100
10	2	31.9402	32.0568	31.9985
11	2	32.3445	32.0275	32.186
12	2	31.5679	31.5679	31.5679
		33.6448
809	Liver 15 WT ND			6 ul sample + 6 ul Water					WT ND	B-Actin
B-Actin	Efficiency target	Target Ct 1	Target Ct 2	Target Ct								ΔCT fraction x		% of mRNA in each fraction
1	2	33.2068	33.2068	33.2068					Target mRNA	Fraction Number	CT	CT (fraction 1) - CT (fraction x)	2^(ΔCT fraction x)	2^(ΔCT fraction x) * 100/Sum
2	2	33.6357	33.6357	33.6357					B-Actin	1	33.2068	0	1	0.796077
3	2	30.8724	30.8724	30.8724					B-Actin	2	33.6357	-0.428967	0.742794	0.625976
4	2	32.8266	32.5103	32.6684					B-Actin	3	30.8724	2.33435	5.04325	2.10426
5	2	34.789	34.2815	34.5353					B-Actin	4	32.6684	0.538372	1.45233	2.69513
6	2	30.5997	32.794	31.6969					B-Actin	5	34.5353	-1.32848	0.398188	0.738926
7	2	32.8659	32.8659	32.8659					B-Actin	6	31.6969	1.50992	2.84795	5.28501	12.2454
8	2	31.4199	31.4667	31.4433					B-Actin	7	32.8659	0.340912	1.26656	0.827301
9	2	32.5282	32.3135	32.4209					B-Actin	8	31.4433	1.76349	3.39518	6.30051
10	2	31.3244	31.1445	31.2344					B-Actin	9	32.4209	0.785927	1.7242	3.19964
11	2	33.2979	33.8697	33.5838					B-Actin	10	31.2344	1.97237	3.92411	7.28207
12	2	27.5281	28.4642	27.9962					B-Actin	11	33.5838	-0.376982	0.770047	1.42899
13	2	28.4412	27.193	27.8171					B-Actin	12	27.9962	5.21059	37.0293	68.7161	87.7546
													125.616
		35.4782												100
									WT CID	B-Actin
809	Liver 41 WT CID			6 ul sample + 6 ul Water								ΔCT fraction x		% of mRNA in each fraction
B-Actin	Efficiency target	Target Ct 1	Target Ct 2	Target Ct					Target mRNA	Fraction Number	CT	CT (fraction 1) - CT (fraction x)	2^(ΔCT fraction x)	2^(ΔCT fraction x) * 100/Sum
1	2	34.1948	34.1948	34.1948					B-Actin	1	34.1948	0	1	0.60547
2	2	33.6448	33.6448	33.6448					B-Actin	2	33.6448	0.549976	1.46406	0.886446
3	2	30.3617	30.3617	30.3617					B-Actin	3	30.3617	3.83309	14.252	8.62914
4	2	30.2135	30.3751	30.2943					B-Actin	4	30.2943	3.90049	14.9336	9.04183
5	2	30.9628	30.9628	30.9628					B-Actin	5	30.9628	3.232	9.39571	5.68882
6	2	30.7101	29.1898	29.9499					B-Actin	6	29.9499	4.24485	18.9595	11.4794	36.3311
7	2	29.7136	29.7626	29.7381					B-Actin	7	29.7381	4.45667	21.9579	13.2949
8	2	29.7722	30.6166	30.1944					B-Actin	8	30.1944	4.00038	16.0043	9.69011
9	2	29.6885	31.5761	30.6323					B-Actin	9	30.6323	3.5625	11.8146	7.15338
10	2	32.2298	29.5292	30.8795					B-Actin	10	30.8795	3.31529	9.95412	6.02693
11	2	29.8085	29.9592	29.8838					B-Actin	11	29.8838	4.31096	19.8485	12.0177
12	2	29.7339	29.3022	29.518					B-Actin	12	29.518	4.67676	25.5767	15.4859	63.6689
													165.161	100
		35.4782
									HJV ND	B-Actin
												ΔCT fraction x		% of mRNA in each fraction
									Target mRNA	Fraction Number	CT	CT (fraction 1) - CT (fraction x)	2^(ΔCT fraction x)	2^(ΔCT fraction x) * 100/Sum
809	Liver 1 HJV ND			6 ul sample + 6 ul Water					B-Actin	1	33.2616	0	1	1.94175
B-Actin	Efficiency target	Target Ct 1	Target Ct 2	Target Ct					B-Actin	2	34.3114	-1.04978	0.483042	0.937948
1	2	33.2616	33.2616	33.2616					B-Actin	3	32.3921	0.869469	1.82699	3.54756
2	2	34.3114	34.3114	34.3114					B-Actin	4	32.6966	0.565022	1.47941	2.87264
3	2	32.3921	32.3921	32.3921					B-Actin	5	33.0599	0.201698	1.15005	2.23311
4	2	32.6966	32.6966	32.6966					B-Actin	6	31.3935	1.86803	3.65033	7.08804	18.6211
5	2	32.5194	33.6004	33.0599					B-Actin	7	31.2326	2.029	4.08122	7.92472
6	2	32.1026	30.6845	31.3935					B-Actin	8	31.8051	1.45645	2.74432	5.32879
7	2	32.2442	30.221	31.2326					B-Actin	9	33.1536	0.107956	1.0777	2.09263
8	2	31.2015	32.4087	31.8051					B-Actin	10	31.043	2.21856	4.6543	9.03748
9	2	33.6663	32.6409	33.1536					B-Actin	11	29.675	3.58657	12.0134	23.327
10	2	30.754	31.3321	31.043					B-Actin	12	29.1456	4.11596	17.3392	33.6684	81.3789
11	2	29.4787	29.8713	29.675									51.4999	100
12	2	28.8605	29.4307	29.1456
									HJV IDD	B-Actin
		35.4782										ΔCT fraction x		% of mRNA in each fraction
									Target mRNA	Fraction Number	CT	CT (fraction 1) - CT (fraction x)	2^(ΔCT fraction x)	2^(ΔCT fraction x) * 100/Sum
									B-Actin	1	34.3487	0	1	0.529261
									B-Actin	2	32.3647	1.98393	3.95569	2.09359
809	Liver 23 HJV IDD			6 ul sample + 6 ul Water					B-Actin	3	31.6736	2.67509	6.38679	3.38028
B-Actin	Efficiency target	Target Ct 1	Target Ct 2	Target Ct					B-Actin	4	31.1453	3.20336	9.211	4.87503
1	2	34.3487	34.3487	34.3487					B-Actin	5	29.7301	4.61855	24.5653	13.0014
2	2	32.3647	32.3647	32.3647					B-Actin	6	31.4334	2.91523	7.54349	3.99248	27.8721
3	2	31.8347	31.5124	31.6736					B-Actin	7	31.2929	3.05579	8.31541	4.40102
4	2	30.6352	31.6554	31.1453					B-Actin	8	31.2449	3.10376	8.59659	4.54984
5	2	29.5847	29.8755	29.7301					B-Actin	9	31.7393	2.60939	6.10245	3.22979
6	2	31.1611	31.7057	31.4334					B-Actin	10	31.1757	3.173	9.01918	4.7735
7	2	30.6909	31.8949	31.2929					B-Actin	11	28.7054	5.64322	49.9779	26.4514
8	2	31.2626	31.2272	31.2449					B-Actin	12	28.5866	5.76205	54.2688	28.7224	72.1279
9	2	32.8911	30.5875	31.7393									188.943	100
10	2	30.2479	32.1034	31.1757
11	2	28.4398	28.971	28.7054
12	2	28.5636	28.6096	28.5866
		31.3881
Combined fractions
Monosomes = 1-6	Polysomes = 7-12
FPN+/B-Actin	Efficiency target	Target Ct 1	Target Ct 2	Target Ct	Delta Ct target	Numerator	Efficiency refer.	Refer. Ct 1	Refer. Ct 2	Refer. Ct	Delta Ct refer.	Denominator	Fold Induction	FPN+/B-Actin
15 Mono	2	34.4531	38.4895	36.4713	0	1	2	33.9399	31.8853	32.9126	0	1	1	WT ND	0.162137
15 Poly	2	30.5199	29.7553	30.1376	6.33372	80.6565	2	29.252	29.1552	29.2036	3.70901	13.0774	6.16761	WT ND
41 Mono	2	39.3007	37.4071	38.3539	-1.8826	0.271195	2	31.5463	32.6777	32.112	0.800627	1.74186	0.155693	Wt CID	0.0173772
41 Poly	2	31.064	29.3563	30.2102	6.26114	76.6993	2	30.7575	28.8723	29.8149	3.0977	8.56055	8.95962	Wt CID
1 Mono	2	34.0392	30.6257	32.3325	4.13887	17.6166	2	32.7673	31.5685	32.1679	0.74473	1.67566	10.5132	KO ND	0.785979
1 Poly	2	31.2938	29.6523	30.4731	5.99826	63.9229	2	31.556	29.7559	30.6559	2.25669	4.77893	13.376	KO ND
23 Mono	2	31.4334	31.4334	31.4334	5.03791	32.8519	2	30.3679	31.8912	31.1295	1.78309	3.44162	9.54548	KO IDD	8.12717
23 Poly	2	33.7048	33.8014	33.7531	2.71822	6.58059	2	30.8388	30.0141	30.4265	2.48615	5.60281	1.17451	KO IDD
			32.4071						35.4782
FtH/B-Actin	Efficiency target	Target Ct 1	Target Ct 2	Target Ct	Delta Ct target	Numerator	Efficiency refer.	Refer. Ct 1	Refer. Ct 2	Refer. Ct	Delta Ct refer.	Denominator	Fold Induction	FtH/B-Actin
15 Mono	2			#DIV/0!	#DIV/0!	#DIV/0!	2			#DIV/0!	#DIV/0!	#DIV/0!	#DIV/0!	WT ND
15 Poly	2			#DIV/0!	#DIV/0!	#DIV/0!	2			#DIV/0!	#DIV/0!	#DIV/0!	#DIV/0!	WT ND
41 Mono	2			#DIV/0!	#DIV/0!	#DIV/0!	2			#DIV/0!	#DIV/0!	#DIV/0!	#DIV/0!	Wt CID
41 Poly	2			#DIV/0!	#DIV/0!	#DIV/0!	2			#DIV/0!	#DIV/0!	#DIV/0!	#DIV/0!	Wt CID
1 Mono	2			#DIV/0!	#DIV/0!	#DIV/0!	2			#DIV/0!	#DIV/0!	#DIV/0!	#DIV/0!	KO ND
1 Poly	2			#DIV/0!	#DIV/0!	#DIV/0!	2			#DIV/0!	#DIV/0!	#DIV/0!	#DIV/0!	KO ND
23 Mono	2			#DIV/0!	#DIV/0!	#DIV/0!	2			#DIV/0!	#DIV/0!	#DIV/0!	#DIV/0!	KO IDD
23 Poly	2			#DIV/0!	#DIV/0!	#DIV/0!	2			#DIV/0!	#DIV/0!	#DIV/0!	#DIV/0!	KO IDD
			30.6289
	FPN			Act
42 Mono	33.5427	33.917		30.6462	31.5125
42 Poly	31.5744	29.6924		28.7043	27.2051
