# Supplementary material for: A crosstalk between hepcidin and IRE/IRP pathways controls ferroportin expression and determines serum iron levels in mice
Source: eLife. 2022 Sep 6;11:e81332. doi: 10.7554/eLife.81332 (PMC9499557; doi:10.7554/eLife.81332)
Supplement: Figure 8—source data 1. [file elife-81332-fig8-data1.xlsx]

## Sheet: 810
810	Liver	Fig. 7A
FPN+/RPL 19	Efficiency target	Target Ct 1	Target Ct 2	Target Ct	Delta Ct target	Numerator	Efficiency refer.	Refer. Ct 1	Refer. Ct 2	Refer. Ct	Delta Ct refer.	Denominator	Fold Induction	FPN+/RPL 19
809.15	2	21.6908	21.6472	21.669	-0.565151	0.675885	2	21.9042	21.9088	21.9065	-0.142151	0.906167	0.745872	WT ND PBS
809.16	2	20.9786	21.0413	21.01	0.0938808	1.06724	2	21.498	21.7113	21.6046	0.15969	1.11705	0.955409	WT ND PBS
809.17	2	21.6416	21.7154	21.6785	-0.574612	0.671467	2	22.3265	22.4653	22.3959	-0.63154	0.645487	1.04025	WT ND PBS
809.52	2	21.2059	21.1119	21.1589	-0.0550125	0.962586	2	22.0535	22.1392	22.0963	-0.332002	0.794433	1.21166	WT ND PBS
809.53	2	21.8561	19.5429	20.6995	0.404355	1.3235	2	20.7264	21.9553	21.3409	0.423472	1.34115	0.986837	WT ND PBS
809.54	2	20.9201	19.8946	20.4073	0.696539	1.62061	2	20.9786	21.505	21.2418	0.522532	1.43647	1.12819	WT ND PBS
809.38	2	20.2899	20.2587	20.2743	0.829568	1.77715	2	19.2866	20.4956	19.8911	1.87323	3.66352	0.485094	WT CID PBS
809.39	2	18.6457	18.8908	18.7682	2.33562	5.0477	2	20.8546	20.8546	20.8546	0.909697	1.87865	2.68687	WT CID PBS
809.4	2	18.4912	20.5429	19.5171	1.58681	3.00384	2	20.944	21.5199	21.2319	0.532403	1.44634	2.07686	WT CID PBS
809.41	2	19.9554	18.849	19.4022	1.70168	3.25279	2	20.1458	20.104	20.1249	1.63941	3.11539	1.0441	WT CID PBS
809.42	2	18.4403	18.451	18.4457	2.65819	6.3124	2	20.8573	20.9722	20.9147	0.849608	1.80201	3.50298	WT CID PBS
809.43	2	18.5341	17.6212	18.0776	3.02622	8.1467	2	20.3281	21.3224	20.8252	0.939133	1.91738	4.24888	WT CID PBS
809.1	2	18.2838	18.9181	18.601	2.50289	5.66821	2	20.4384	20.6092	20.5238	1.24057	2.36292	2.39882	HJV ND PBS
809.2	2	19.1707	19.9086	19.5396	1.56423	2.9572	2	21.2412	21.2412	21.2412	0.52315	1.43709	2.05777	HJV ND PBS
809.3	2	20.8645	18.1881	19.5263	1.57756	2.98466	2	19.9721	20.4757	20.2239	1.54043	2.90882	1.02607	HJV ND PBS
809.9	2	18.7505	19.3445	19.0475	2.0564	4.15947	2	20.4289	20.151	20.29	1.47437	2.77863	1.49695	HJV ND PBS
809.1	2	18.8392	18.8484	18.8438	2.26007	4.79013	2	21.1179	20.3993	20.7586	1.00573	2.00796	2.38557	HJV ND PBS
809.11	2	19.5096	20.7738	20.1417	0.962196	1.94827	2	21.2471	22.7126	21.9799	-0.215519	0.861236	2.26218	HJV ND PBS
809.23	2	18.7263	19.7574	19.2419	1.86199	3.6351	2	21.0351	20.4948	20.7649	0.999391	1.99916	1.81832	HJV IDD PBS
809.24	2	21.2972	20.9332	21.1152	-0.0113161	0.992187	2	20.9039	20.3847	20.6443	1.12001	2.17349	0.456495	HJV IDD PBS
809.25	2	19.9786	20.256	20.1173	0.986558	1.98145	2	20.0124	19.9362	19.9743	1.79004	3.45824	0.572965	HJV IDD PBS
809.26	2	20.8533	21.4255	21.1394	-0.0355299	0.975673	2	20.8626	21.191	21.0268	0.737562	1.66736	0.585162	HJV IDD PBS
809.27	2	18.905	18.3869	18.6459	2.45792	5.49423	2	19.4608	19.8185	19.6396	2.12471	4.36115	1.25981	HJV IDD PBS
809.28	2	19.6	19.6	19.6	1.50385	2.83598	2	19.4059	19.4059	19.4059	2.35847	5.12825	0.553011	HJV IDD PBS
810.46	2	24.8373	24.7892	24.8132	-3.70938	0.076448	2	21.3225	21.3711	21.3468	0.417533	1.33564	0.0572369	WT ND LPS
810.47	2	27.3233	27.1417	27.2325	-6.12864	0.0142921	2	21.7522	21.717	21.7346	0.0297243	1.02082	0.0140007	WT ND LPS
810.48	2	25.8987	25.8349	25.8668	-4.76295	0.0368306	2	21.1658	21.2395	21.2026	0.561704	1.47601	0.0249528	WT ND LPS
810.49	2	26.4366	26.2397	26.3382	-5.2343	0.0265656	2	21.3544	21.388	21.3712	0.393101	1.31321	0.0202294	WT ND LPS
810.5	2	25.8433	25.8862	25.8648	-4.7609	0.036883	2	21.5873	21.3305	21.4589	0.305432	1.23579	0.0298457	WT ND LPS
810.51	2	26.3476	26.0297	26.1887	-5.0848	0.029466	2	21.6304	21.9586	21.7945	-0.0301245	0.979336	0.0300878	WT ND LPS
810.52	2	24.8405	24.5964	24.7185	-3.61461	0.0816382	2	21.6179	21.4045	21.5112	0.253122	1.19178	0.0685009	WT ND LPS
810.36	2	25.8718	25.7558	25.8138	-4.70995	0.0382088	2	21.6661	21.6806	21.6733	0.0909912	1.0651	0.0358734	WT CID LPS
810.37	2	25.4384	25.5502	25.4943	-4.39047	0.0476802	2	21.8854	21.838	21.8617	-0.0973442	0.934752	0.0510084	WT CID LPS
810.38	2	25.7885	25.8059	25.7972	-4.69333	0.0386515	2	21.8988	21.9638	21.9313	-0.166953	0.890722	0.0433935	WT CID LPS
810.39	2	24.2262	24.1712	24.1987	-3.09485	0.117046	2	21.2168	21.2082	21.2125	0.551861	1.46598	0.0798417	WT CID LPS
810.4	2	25.2767	24.8963	25.0865	-3.98264	0.0632567	2	21.7386	21.8464	21.7925	-0.0281704	0.980663	0.064504	WT CID LPS
810.41	2	25.7129	25.6372	25.675	-4.57118	0.0420667	2	21.2654	21.2584	21.2619	0.502415	1.41658	0.0296959	WT CID LPS
810.26	2	25.3911	25.5574	25.4742	-4.37038	0.0483488	2	21.5636	21.5262	21.5449	0.219438	1.16428	0.0415268	HJV ND LPS
810.27	2	24.5402	24.6826	24.6114	-3.50756	0.0879265	2	21.173	20.8983	21.0357	0.728686	1.65713	0.0530595	HJV ND LPS
810.28	2	24.8024	24.8738	24.8381	-3.73423	0.0751421	2	21.1861	21.1609	21.1735	0.59084	1.50612	0.0498911	HJV ND LPS
810.29	2	23.9711	24.1129	24.042	-2.93814	0.130476	2	20.9353	20.9676	20.9514	0.812893	1.75673	0.0742722	HJV ND LPS
810.3	2	24.2221	24.3179	24.27	-3.16613	0.111404	2	20.912	20.9287	20.9204	0.84399	1.79501	0.0620631	HJV ND LPS
810.31	2	23.7957	23.5726	23.6842	-2.58033	0.167203	2	20.2216	20.1466	20.1841	1.58022	2.99016	0.0559177	HJV ND LPS
810.21	2	25.4861	25.5411	25.5136	-4.40977	0.0470465	2	20.4639	20.6354	20.5496	1.2147	2.32093	0.0202706	HJV IDD LPS
810.22	2	25.4797	25.3507	25.4152	-4.31132	0.0503692	2	20.5549	20.6541	20.6045	1.15984	2.23432	0.0225434	HJV IDD LPS
810.23	2	25.0208	25.2907	25.1557	-4.05184	0.0602939	2	20.7202	20.5962	20.6582	1.10614	2.15269	0.0280087	HJV IDD LPS
810.24	2	24.2364	23.9705	24.1034	-2.99958	0.125037	2	21.0664	21.1138	21.0901	0.674255	1.59577	0.0783549	HJV IDD LPS
810.25	2	24.588	24.7945	24.6913	-3.58742	0.0831918	2	20.3759	20.4322	20.4041	1.36027	2.56733	0.032404	HJV IDD LPS
		37.1134		21.1039				34.8962		21.7643
810	Liver	Fig. 7B
FPN-/RPL 19	Efficiency target	Target Ct 1	Target Ct 2	Target Ct	Delta Ct target	Numerator	Efficiency refer.	Refer. Ct 1	Refer. Ct 2	Refer. Ct	Delta Ct refer.	Denominator	Fold Induction	FPN-/RPL 19
809.15	2	29.7514	29.8944	29.8229	-0.542373	0.68664	2	21.9042	21.9088	21.9065	-0.142151	0.906167	0.757741	WT ND PBS
809.16	2	28.6438	28.869	28.7564	0.524159	1.43809	2	21.498	21.7113	21.6046	0.15969	1.11705	1.28741	WT ND PBS
809.17	2	29.4917	29.4936	29.4926	-0.21208	0.863292	2	22.3265	22.4653	22.3959	-0.63154	0.645487	1.33743	WT ND PBS
809.52	2	28.799	28.8358	28.8174	0.463115	1.37852	2	22.0535	22.1392	22.0963	-0.332002	0.794433	1.73522	WT ND PBS
809.53	2	29.4411	29.537	29.489	-0.208472	0.865454	2	20.7264	21.9553	21.3409	0.423472	1.34115	0.645307	WT ND PBS
809.54	2	29.3768	29.233	29.3049	-0.0243497	0.983264	2	20.9786	21.505	21.2418	0.522532	1.43647	0.684498	WT ND PBS
809.38	2	27.8259	27.8588	27.8424	1.43818	2.70978	2	19.2866	20.4956	19.8911	1.87323	3.66352	0.739665	WT CID PBS
809.39	2	28.9014	28.7591	28.8303	0.450297	1.36632	2	20.8546	20.8546	20.8546	0.909697	1.87865	0.727289	WT CID PBS
809.4	2	28.6009	28.8157	28.7083	0.572242	1.48683	2	20.944	21.5199	21.2319	0.532403	1.44634	1.028	WT CID PBS
809.41	2	27.9278	27.98	27.9539	1.32663	2.50816	2	20.1458	20.104	20.1249	1.63941	3.11539	0.805086	WT CID PBS
809.42	2	28.4921	28.4819	28.487	0.793523	1.7333	2	20.8573	20.9722	20.9147	0.849608	1.80201	0.961871	WT CID PBS
809.43	2	28.2705	28.115	28.1927	1.08784	2.12555	2	20.3281	21.3224	20.8252	0.939133	1.91738	1.10857	WT CID PBS
809.1	2	28.771	29.135	28.953	0.327571	1.2549	2	20.4384	20.6092	20.5238	1.24057	2.36292	0.53108	HJV ND PBS
809.2	2	28.8373	28.7968	28.8171	0.4635	1.37888	2	21.2412	21.2412	21.2412	0.52315	1.43709	0.959497	HJV ND PBS
809.3	2	28.4015	28.3113	28.3564	0.924168	1.89759	2	19.9721	20.4757	20.2239	1.54043	2.90882	0.652358	HJV ND PBS
809.9	2	28.4456	28.744	28.5948	0.685762	1.60855	2	20.4289	20.151	20.29	1.47437	2.77863	0.5789	HJV ND PBS
809.1	2	27.9363	28.2341	28.0852	1.19537	2.29003	2	21.1179	20.3993	20.7586	1.00573	2.00796	1.14048	HJV ND PBS
809.11	2	27.971	28.2254	28.0982	1.18235	2.26946	2	21.2471	22.7126	21.9799	-0.215519	0.861236	2.63512	HJV ND PBS
809.23	2	28.6119	28.7062	28.6591	0.621475	1.53845	2	21.0351	20.4948	20.7649	0.999391	1.99916	0.769548	HJV IDD PBS
809.24	2	28.8694	28.945	28.9072	0.373316	1.29533	2	20.9039	20.3847	20.6443	1.12001	2.17349	0.595966	HJV IDD PBS
809.25	2	29.9726	29.9632	29.9679	-0.687357	0.62099	2	20.0124	19.9362	19.9743	1.79004	3.45824	0.179568	HJV IDD PBS
809.26	2	29.6725	30.2565	29.9645	-0.683924	0.62247	2	20.8626	21.191	21.0268	0.737562	1.66736	0.373327	HJV IDD PBS
809.27	2	29.0614	29.1045	29.083	0.197567	1.14676	2	19.4608	19.8185	19.6396	2.12471	4.36115	0.26295	HJV IDD PBS
809.28	2	27.9334	27.9334	27.9334	1.34713	2.54405	2	19.4059	19.4059	19.4059	2.35847	5.12825	0.496086	HJV IDD PBS
810.46	2	33.1572	32.7702	32.9637	-3.68314	0.0778509	2	21.3225	21.3711	21.3468	0.417533	1.33564	0.0582873	WT ND LPS
810.47	2	34.8929	33.8406	34.3667	-5.08618	0.029438	2	21.7522	21.717	21.7346	0.0297243	1.02082	0.0288377	WT ND LPS
810.48	2	33.5684	33.8473	33.7079	-4.42733	0.0464773	2	21.1658	21.2395	21.2026	0.561704	1.47601	0.0314884	WT ND LPS
810.49	2	33.9266	33.9793	33.953	-4.67242	0.0392158	2	21.3544	21.388	21.3712	0.393101	1.31321	0.0298625	WT ND LPS
810.5	2	33.9091	33.5009	33.705	-4.42446	0.0465699	2	21.5873	21.3305	21.4589	0.305432	1.23579	0.0376843	WT ND LPS
810.51	2	33.8178	33.6775	33.7477	-4.4671	0.0452135	2	21.6304	21.9586	21.7945	-0.0301245	0.979336	0.0461675	WT ND LPS
810.52	2	33.2306	32.9018	33.0662	-3.78568	0.0725098	2	21.6179	21.4045	21.5112	0.253122	1.19178	0.0608415	WT ND LPS
810.36	2	34.5942	34.1235	34.3589	-5.0783	0.0295993	2	21.6661	21.6806	21.6733	0.0909912	1.0651	0.0277901	WT CID LPS
810.37	2	33.6684	32.9498	33.3091	-4.02856	0.061275	2	21.8854	21.838	21.8617	-0.0973442	0.934752	0.0655522	WT CID LPS
810.38	2	34.0523	33.6375	33.8449	-4.56435	0.0422662	2	21.8988	21.9638	21.9313	-0.166953	0.890722	0.0474517	WT CID LPS
810.39	2	32.4664	32.5917	32.529	-3.24849	0.105222	2	21.2168	21.2082	21.2125	0.551861	1.46598	0.0717764	WT CID LPS
810.4	2	32.3918	32.4766	32.4342	-3.15361	0.112375	2	21.7386	21.8464	21.7925	-0.0281704	0.980663	0.11459	WT CID LPS
810.41	2	32.9489	32.7302	32.8395	-3.55898	0.0848477	2	21.2654	21.2584	21.2619	0.502415	1.41658	0.059896	WT CID LPS
810.26	2	33.2439	33.5108	33.3773	-4.09679	0.0584443	2	21.5636	21.5262	21.5449	0.219438	1.16428	0.0501979	HJV ND LPS
810.27	2	33.2905	32.9515	33.121	-3.84044	0.0698091	2	21.173	20.8983	21.0357	0.728686	1.65713	0.0421265	HJV ND LPS
810.28	2	33.8177	33.4794	33.6485	-4.36796	0.0484298	2	21.1861	21.1609	21.1735	0.59084	1.50612	0.0321552	HJV ND LPS
810.29	2	32.4771	32.2433	32.3602	-3.07965	0.118286	2	20.9353	20.9676	20.9514	0.812893	1.75673	0.0673331	HJV ND LPS
810.3	2	32.0616	32.3536	32.2076	-2.92705	0.131483	2	20.912	20.9287	20.9204	0.84399	1.79501	0.0732494	HJV ND LPS
810.31	2	32.0095	32.2216	32.1156	-2.83502	0.140144	2	20.2216	20.1466	20.1841	1.58022	2.99016	0.0468684	HJV ND LPS
810.21	2	32.7693	32.3489	32.5591	-3.27852	0.103054	2	20.4639	20.6354	20.5496	1.2147	2.32093	0.0444022	HJV IDD LPS
810.22	2	32.7018	32.6	32.6509	-3.37037	0.0966983	2	20.5549	20.6541	20.6045	1.15984	2.23432	0.0432787	HJV IDD LPS
810.23	2	33.004	32.7912	32.8976	-3.61705	0.0815004	2	20.7202	20.5962	20.6582	1.10614	2.15269	0.0378599	HJV IDD LPS
810.24	2	33.0648	32.4378	32.7513	-3.47072	0.0902003	2	21.0664	21.1138	21.0901	0.674255	1.59577	0.0565245	HJV IDD LPS
810.25	2	33.2655	33.4851	33.3753	-4.09474	0.0585277	2	20.3759	20.4322	20.4041	1.36027	2.56733	0.0227971	HJV IDD LPS
		35.8674		29.2806				34.8962		21.7643
