# Supplementary material for: A crosstalk between hepcidin and IRE/IRP pathways controls ferroportin expression and determines serum iron levels in mice
Source: eLife. 2022 Sep 6;11:e81332. doi: 10.7554/eLife.81332 (PMC9499557; doi:10.7554/eLife.81332)
Supplement: Figure 8—source data 2. [file elife-81332-fig8-data2.xlsx]

## Sheet: 808 Serum NTBI
														Average -Def	Average +Def	Zeroed -Def	Zeroed +Def
Measurement count: 1 Ex: 485 Em: 527 Scaling Factor : 1/1																					C/C -Deferiprone																									810
	1	2	3	4	5	6	7	8	9	10	11	12									Time (min)	16	18	20	22	24	26	28	30	32	34	36	38	40	Slope Fxn	Fe (uM)	Slopes -Def	Slopes +Def	Difference	Mcalibr	Samples Slopes -Def	Samples Slopes +Def	LPI (uM)
A	28.57	29.76	42.34	41.03	44.02	42.55	44.28	42.71	44.2	42.42	44.39	42.25		28.57	29.76	0	0					-0.25	-0.19	-0.1	-0.03	0.09	0.14	0.23	0.27	0.4	0.41	0.52	0.55	0.66	0.0376648	0	0.0376648	0.027967	0.0096978	0.0507295	0.0679121	0.102967	0		0.165931	WT ND		0	1.35
B	28.73	29.92	43.29	41.42	44.68	42.74	43.44	41.52	41.27	39.66	40.53	36.66		28.73	29.92	0	0					0.04	0.1	0.17	0.19	0.21	0.31	0.44	0.4	0.57	0.53	0.67	0.67	0.74	0.0298901	0.078125	0.0298901	0.0237363			0.0372527	0.000879121	0.717012					0.078125	1.67
C	28.88	30.32	44.85	42.98	45.3	45.45	41.9	40.44	42.91	41.73	46.7	40.49		28.88	30.32	0	0					0.11	0.05	0.18	0.24	0.3	0.35	0.49	0.4	0.56	0.63	0.72	0.78	0.9	0.0337637	0.15625	0.0337637	0.0233516			-0.0202747	-0.00662088	0					0.15625
D	28.78	29.79	45.04	43.37	43.72	42.43	44.51	42.49	43.55	41.83	42.74	40.3		28.78	29.79	0	0					0.17	0.23	0.37	0.43	0.53	1.13	0.76	0.65	1.53	0.83	1.19	1.09	1.45	0.0493956	0.3125	0.0493956	0.0248077	0.0245879		-0.0533516	-0.0590659	0.112642					0.3125	2.2
E	28.64	29.97	45.61	43.44	43.6	43.35	43.91	42.93	43.79	43.49	43.3	41.87		28.64	29.97	0	0					0.77	0.9	1.05	1.27	1.37	1.47	1.69	1.82	2.01	2.18	2.42	2.53	2.72	0.0815659	0.625	0.0815659	0.0279396	0.0536264		-0.153049	-0.0642582	0					0.625	3.25
F	28.93	30.09	46.4	44.35	45.86	43.41	40.15	37.3	44.78	44.05	44.38	42.32		28.93	30.09	0	0					1.3	1.53	1.74	1.99	2.21	2.53	2.69	2.79	3.15	3.53	3.6	4.01	4.51	0.125989	1.25	0.125989	0.0469231	0.0790659		-0.0252198	-0.0151099	0		0.22106	WT ND LPS		1.25	4.94
G	29.5	30.33	44.77	44.98	45.3	42.71	44.83	42.32	46.36	42.15	42.77	41.1		29.5	30.33	0	0					2.57	2.42	3.34	3.92	4.42	3.76	4.57	4.79	5.39	5.85	6.52	7.03	8.01	0.212005	2.5	0.212005	0.0575549	0.154451		-0.065467	-0.055467	0					2.5	8.33
H	29.82	29.36	46.11	42.57	43.21	41.47	46.42	43.41	42.68	41.53	44.22	42.59		29.82	29.36	0	0					3.73	4.58	5.37	6.19	7.03	7.77	8.75	9.44	10.04	10.57	11.21	11.56	12.25	0.35772	5	0.35772	0.0952198	0.2625		-0.094533	-0.0471978	0					5	11.02
Measurement count: 2 Ex: 485 Em: 527 Scaling Factor : 1/1																																									0.018544	-0.000549451	0.376377
	1	2	3	4	5	6	7	8	9	10	11	12																													0.0765385	0.0395604	0.728926
A	28.37	28.98	41.74	40.44	43.37	41.76	44.28	42.1	43.75	41.57	44.17	41.89		28.37	28.98	-0.2	-0.78																								-0.0234341	0.0298077	0		0.756978	WT CID
B	28.23	29.12	43.22	41.16	43.69	42.13	42.97	40.93	40.77	38.98	40.04	36.34		28.23	29.12	-0.5	-0.8																								0.0394231	0.000164835	0.773874
C	28.46	29.54	44.49	42.37	44.25	41.96	41.17	39.76	42.84	41.23	45.21	40.78		28.46	29.54	-0.42	-0.78																								0.014533	-0.0351648	0.979663
D	28.34	29.1	44.46	44.27	42.8	41.53	43.48	41.6	43.05	41.17	42.45	40		28.34	29.1	-0.44	-0.69																								0.107363	0.0441209	1.24665
E	28.44	30.19	45.1	42.91	43.21	42.22	43.18	41.63	43.06	41.84	43.05	41.13		28.44	30.19	-0.2	0.22																								-0.00425824	-0.0440659	0.784705
F	28.95	29.43	45.53	43.43	44.55	42.42	39.46	36.66	43.73	42.27	43.67	41.73		28.95	29.43	0.02	-0.66																								0.018022	-0.0261264	0.87027		0.560829	WT CID LPS
G	29.36	29.78	44.86	42.85	44.47	42.41	44.9	42.72	44.39	41.87	42.52	41.11		29.36	29.78	-0.14	-0.55																								0.0123901	-0.0221703	0.681269
H	29.78	29.24	44.71	42.15	42.81	41.02	46.59	43.28	42.82	41.59	42.54	42.73		29.78	29.24	-0.04	-0.12																								0.0167857	-0.00692308	0.467357
Measurement count: 3 Ex: 485 Em: 527 Scaling Factor : 1/1																																									0.0626923	0.0228571	0.785247
	1	2	3	4	5	6	7	8	9	10	11	12																													-0.0531868	-0.0400275	0
A	27.69	27.84	40.36	39	41.77	40.2	44.47	41.57	44.12	40.91	44.58	40.48		27.69	27.84	-0.88	-1.92																								-0.00532967	-0.0790934	1.45406		0.967532	KO ND
B	27.63	27.79	45.02	41.95	41.99	40.43	43.1	40.47	41	38.64	38.78	34.94		27.63	27.79	-1.1	-2.13																								0.119396	0.0775	0.825863
C	27.92	28.1	45.03	42.02	42	39.88	39.4	38.03	42.94	41.62	42.92	38.45		27.92	28.1	-0.96	-2.22																								0.00247253	-0.0372527	0.783081
D	27.81	27.73	45	43	40.59	39.19	42.71	40.76	43.14	41.39	42.38	39.84		27.81	27.73	-0.97	-2.06																								-0.00178571	-0.0541484	1.03219
E	28.03	27.9	45.28	42.8	42.7	40.86	43.56	41.47	43.2	41.52	43.04	41.21		28.03	27.9	-0.61	-2.07																								0.0538462	0.0161813	0.742464
F	28.52	27.79	45.3	41.84	42.02	40.17	38.16	35.51	42.71	40.81	41.87	39.48		28.52	27.79	-0.41	-2.3																								0.0057967	-0.0251099	0.609243		0.526061	KO ND LPS
G	29.22	28.09	45.03	43.09	42.85	40.72	44.66	42.78	44.79	41.99	42.63	41.11		29.22	28.09	-0.28	-2.24																								0.041978	0.0242857	0.348758
H	30.12	28.22	44.86	41.91	42.86	41.02	46.95	43.67	43.21	41.58	41.42	39.8		30.12	28.22	0.3	-1.14																								-0.079011	-0.0351648	0
Measurement count: 4 Ex: 485 Em: 527 Scaling Factor : 1/1																																									-0.010989	-0.00898352	0
	1	2	3	4	5	6	7	8	9	10	11	12																													0.0436538	-0.0411813	1.6723
A	27.88	27.9	40.31	38.78	41.61	40.24	44.37	41.41	43.82	41.16	44.41	40.36		27.88	27.9	-0.69	-1.86																								-0.00211538	-0.0395055	0.737049		0.333594	KO IDD
B	27.88	27.85	45.29	41.97	41.87	40.21	43.02	40.49	40.82	38.54	38.59	34.77		27.88	27.85	-0.85	-2.07																								0.0178297	-0.0031044	0.412661
C	28.05	28.27	44.01	42.27	41.88	39.74	39.17	37.77	42.89	41.16	42.73	38.18		28.05	28.27	-0.83	-2.05																								-0.026511	0.0298901	0
D	27.89	27.86	44.55	42.8	40.5	39.04	42.87	40.82	43.04	41.11	42.25	39.68		27.89	27.86	-0.89	-1.93																								0.0343407	0.0309066	0.0676937
E	28.23	27.99	45	42.32	42.9	40.83	43.35	41.22	43.06	41.51	43.01	40.9		28.23	27.99	-0.41	-1.98																								0.0670879	0.0442308	0.450569
F	28.7	27.83	45.67	41.76	41.6	39.86	37.82	35.1	42.62	40.52	41.71	39.21		28.7	27.83	-0.23	-2.26																								-0.00123626	-0.042033	0.804201		0.458259	KO IDD LPS
G	29.47	28.08	47.09	43.16	42.9	40.64	45.06	42.85	44.68	41.75	42.58	40.78		29.47	28.08	-0.03	-2.25																								-0.00326923	-0.0394231	0.712679
H	30.56	28.04	44.87	42.19	42.44	40.37	46.71	43.27	43.31	41.5	40.92	40.03		30.56	28.04	0.74	-1.32																								-0.0136538	0.0458242	0
Measurement count: 5 Ex: 485 Em: 527 Scaling Factor : 1/1																																									-0.0309615	-0.0538462	0.451111
	1	2	3	4	5	6	7	8	9	10	11	12																													0.0128297	-0.00357143	0.323305
A	27.91	27.94	39.86	38.61	41.22	39.81	43.98	41.16	44.22	41.52	43.65	39.54		27.91	27.94	-0.66	-1.82
B	28.23	27.96	43.35	41.93	41.19	39.87	42.76	39.98	40.93	38.16	38.31	34.39		28.23	27.96	-0.5	-1.96
C	28.4	28.25	44.25	42.04	42.28	39.38	38.68	37.35	43.04	41.15	42.02	37.77		28.4	28.25	-0.48	-2.07
D	28.29	27.9	45.25	42.59	40.11	38.51	42.67	40.61	44.18	41.46	42.57	39.72		28.29	27.9	-0.49	-1.89
E	28.63	28.15	46.18	42.5	42.93	40.69	43.45	42.52	43.17	41.52	43	40.99		28.63	28.15	-0.01	-1.82				C/C +Deferiprone
F	29.18	28.01	45.56	41.82	41.51	39.5	38.81	35.54	40.72	39.86	41.87	38.89		29.18	28.01	0.25	-2.08				Time (min)	16	18	20	22	24	26	28	30	32	34	36	38	40	Slope Fxn	Fe (uM)
G	30.27	28.22	45.06	42.9	42.93	40.62	45.39	42.97	44.69	41.69	42.45	40.76		30.27	28.22	0.77	-2.11					-1.39	-1.34	-1.18	-1.23	-1.08	-1.08	-0.92	-0.95	-0.89	-0.86	-0.74	-0.82	-0.69	0.027967	0
H	31.18	28.11	44.77	42.22	42.14	40.41	46.6	43.13	43.47	41.73	41.21	39.33		31.18	28.11	1.36	-1.25					-1.56	-1.56	-1.4	-1.41	-1.28	-1.25	-1.22	-1.24	-1.04	-1.16	-1.07	-1.1	-0.93	0.0237363	0.078125
Measurement count: 6 Ex: 485 Em: 527 Scaling Factor : 1/1																						-1.52	-1.45	-1.39	-1.37	-1.3	-1.07	-1.12	-1.23	-0.84	-1.07	-1.05	-1.11	-0.89	0.0233516	0.15625
	1	2	3	4	5	6	7	8	9	10	11	12										-1.39	-1.32	-1.21	-1.15	-1.13	-1.09	-0.96	-0.95	-0.93	-0.92	-0.82	-0.84	-0.75	0.0248077	0.3125
A	28.08	27.93	39.77	38.22	41	39.51	44.12	41.29	44.03	41.36	43.75	39.15		28.08	27.93	-0.49	-1.83					-1.32	-1.26	-1.16	-1.16	-1.04	-1.08	-0.94	-0.89	-0.85	-0.85	-0.74	-0.81	-0.53	0.0279396	0.625
B	28.38	28.01	43.5	42.02	41.13	39.61	42.66	40.19	40.88	38.46	38.26	34.28		28.38	28.01	-0.35	-1.91					-1.62	-1.57	-1.49	-1.51	-1.32	-1.28	-0.86	-0.96	-0.91	-0.94	-0.78	-0.72	-0.43	0.0469231	1.25
C	28.6	28.3	44.33	42.21	42.48	39.21	38.45	37.21	43.24	41.1	41.85	37.93		28.6	28.3	-0.28	-2.02					-1.68	-1.38	-1.5	-1.43	-1.35	-1.03	-0.98	-0.88	-0.74	-0.7	-0.43	-0.39	-0.32	0.0575549	2.5
D	28.43	28	45.21	42.55	40.07	38.4	43.01	41	44.12	41.44	42.32	39.6		28.43	28	-0.35	-1.79					-0.65	-0.51	-0.49	-0.32	-0.15	-0.04	0.09	0.32	0.84	0.68	1.42	1.57	1.23	0.0952198	5
E	28.86	28.23	47.84	42.83	43.11	40.99	43.52	42.54	42.99	41.41	42.92	40.82		28.86	28.23	0.22	-1.74
F	29.45	28.03	45.75	42.22	41.32	39.44	38.46	35.37	40.99	39.52	41.84	38.78		29.45	28.03	0.52	-2.06
G	30.4	28.31	45.12	43.01	43.32	41.09	45.27	42.86	44.54	41.64	42.48	40.52		30.4	28.31	0.9	-2.02
H	31.67	28.23	44.77	42.33	41.83	40.21	46.45	42.9	43.43	41.48	41.66	39.74		31.67	28.23	1.85	-1.13
Measurement count: 7 Ex: 485 Em: 527 Scaling Factor : 1/1
	1	2	3	4	5	6	7	8	9	10	11	12
A	28.18	28.2	39.8	38.11	40.97	39.52	43.25	41.02	44.54	41.66	44.11	38.93		28.18	28.2	-0.39	-1.56
B	28.52	28.22	43.34	41.82	40.8	39.37	42.62	40.02	41.22	38.37	38.58	34.17		28.52	28.22	-0.21	-1.7
C	28.8	28.57	44.79	42.23	42.31	39.06	38.34	37.21	43.11	41.14	42.24	38.19		28.8	28.57	-0.08	-1.75
D	28.71	28.26	45.31	42.95	40.06	38.24	42.83	40.9	44.25	41.23	42.55	39.79		28.71	28.26	-0.07	-1.53
E	29.12	28.47	46.59	42.61	43.06	40.84	43.63	42.69	43.13	41.41	42.96	40.67		29.12	28.47	0.48	-1.5
F	29.67	28.28	46.2	42.51	41.32	39.21	38.81	35.65	40.87	39.27	41.92	39.09		29.67	28.28	0.74	-1.81
G	30.82	28.54	45.17	42.91	43.51	41.69	45.11	42.77	44.47	41.49	42.36	40.36		30.82	28.54	1.32	-1.79
H	32.38	28.4	44.82	42.39	41.86	39.87	46.48	45.14	43.56	41.29	41.68	39.48		32.38	28.4	2.56	-0.96
Measurement count: 8 Ex: 485 Em: 527 Scaling Factor : 1/1
	1	2	3	4	5	6	7	8	9	10	11	12
A	28.17	28.21	40.53	38	40.66	39.24	43.96	41.41	44.59	41.61	44.33	39.01		28.17	28.21	-0.4	-1.55
B	28.64	28.29	43.22	41.87	40.67	39.37	42.6	40.25	40.96	38.56	38.21	34.13		28.64	28.29	-0.09	-1.63
C	28.87	28.66	44.84	42.2	42.85	38.93	38.25	36.88	43.23	41.02	42.17	38.39		28.87	28.66	-0.01	-1.66
D	28.77	28.31	45.24	42.69	40.08	38.1	43.07	40.86	44.03	41.27	42.27	39.36		28.77	28.31	-0.01	-1.48
E	29.27	28.49	48.04	42.91	43.01	41.01	43.57	42.76	42.85	41.5	42.74	40.5		29.27	28.49	0.63	-1.48
F	30.02	28.31	45.85	42.48	41.24	39.24	39.04	35.84	40.96	39.07	42.03	39.11		30.02	28.31	1.09	-1.78
G	31.52	28.47	44.67	42.74	43.53	41.74	44.93	42.71	44.31	41.38	42.17	40.28		31.52	28.47	2.02	-1.86
H	32.92	28.45	44.9	41.89	41.56	39.72	46.37	42.81	43.45	41.1	41.82	40.38		32.92	28.45	3.1	-0.91
Measurement count: 9 Ex: 485 Em: 527 Scaling Factor : 1/1
	1	2	3	4	5	6	7	8	9	10	11	12
A	28.32	28.37	40.82	38.17	40.8	39.28	43.76	41.16	44.89	41.76	44.45	38.86		28.32	28.37	-0.25	-1.39
B	28.77	28.36	43.17	41.69	40.77	39.36	42.46	40.14	41.19	38.63	38.06	34.09		28.77	28.36	0.04	-1.56
C	28.99	28.8	44.92	42.19	42.57	38.73	38.24	36.93	43.2	41.06	42.43	38.59		28.99	28.8	0.11	-1.52
D	28.95	28.4	45.38	42.59	39.98	38.38	43.18	40.76	44.24	41.3	42.48	39.61		28.95	28.4	0.17	-1.39
E	29.41	28.65	45.93	42.45	42.93	40.74	43.55	42.55	43.18	41.33	42.94	40.6		29.41	28.65	0.77	-1.32
F	30.23	28.47	46.24	42.53	41.29	39.28	39.33	36.03	41.15	39.12	42.2	39.11		30.23	28.47	1.3	-1.62
G	32.07	28.65	44.89	42.48	43.74	41.83	44.93	42.59	44.33	41.35	42.03	40.2		32.07	28.65	2.57	-1.68
H	33.55	28.71	44.8	41.96	41.59	39.75	46.55	43.07	43.69	41.22	41.94	40.42		33.55	28.71	3.73	-0.65
Measurement count: 10 Ex: 485 Em: 527 Scaling Factor : 1/1
	1	2	3	4	5	6	7	8	9	10	11	12										Samples - Deferiprone
A	28.38	28.42	41.01	38.14	40.51	38.95	43.95	41.28	45.01	41.86	44.52	39.29		28.38	28.42	-0.19	-1.34					Time (min) ->	16	18	20	22	24	26	28	30	32	34	36	38	40	Slope Fxn
B	28.83	28.36	43.17	41.49	40.63	39.1	42.55	40.17	41.08	38.54	38.75	34.19		28.83	28.36	0.1	-1.56					810.46	40.82	41.01	41.27	41.33	41.41	41.66	41.69	41.89	42	42.11	42.28	42.26	42.6	0.0679121
C	28.93	28.87	44.95	42.19	42.52	38.85	38.27	36.9	43.51	41.05	42.52	38.59		28.93	28.87	0.05	-1.45					810.47	43.17	43.17	43.05	43.07	44.28	43.38	44.61	44.24	43.62	44.21	43.69	44.13	43.71	0.0372527
D	29.01	28.47	45.22	42.63	40.12	38.39	42.8	40.67	44.07	41.21	42.25	39.11		29.01	28.47	0.23	-1.32					810.48	44.92	44.95	44.87	44.58	44.75	44.99	44.7	44.62	44.87	44.52	44.38	44.48	44.46	-0.0202747
E	29.54	28.71	48.2	42.75	42.91	40.9	43.22	40.87	42.84	41.2	42.52	40.21		29.54	28.71	0.9	-1.26					810.49	45.38	45.22	45.26	45.01	45.08	45.47	45.03	44.84	44.85	44.42	44.33	44.08	44.19	-0.0533516
F	30.46	28.52	45.84	42.66	41.48	39.48	39.33	36.07	41.25	38.88	42.16	39.28		30.46	28.52	1.53	-1.57					810.5	45.93	48.2	47.98	46.98	47.42	44.64	44.46	44.57	44.43	43.94	44.04	43.94	45.35	-0.153049
G	31.92	28.95	44.9	42.33	43.7	41.7	44.93	42.4	44.5	41.27	41.82	40.05		31.92	28.95	2.42	-1.38					810.43	46.24	45.84	46.17	45.96	45.92	46.23	45.79	45.66	45.96	45.88	45.48	45.41	45.65	-0.0252198
H	34.4	28.85	46.32	41.78	41.45	39.51	46.52	42.84	43.72	41.29	42.1	40.77		34.4	28.85	4.58	-0.51					810.44	44.89	44.9	44.61	44.76	44.44	44.84	44.55	44.35	44.01	43.81	43.46	43.43	43.61	-0.065467
Measurement count: 11 Ex: 485 Em: 527 Scaling Factor : 1/1																						810.45	44.8	46.32	44.79	44.84	44.76	44.73	44.26	44.14	44.08	43.83	43.56	43.23	43.29	-0.094533
	1	2	3	4	5	6	7	8	9	10	11	12										810.53	40.8	40.51	40.69	40.53	40.65	40.72	40.86	40.84	40.9	40.65	40.85	41.08	41.18	0.018544
A	28.47	28.58	41.27	38.36	40.69	39.03	43.2	40.86	44.86	41.87	44.69	39.28		28.47	28.58	-0.1	-1.18					810.54	40.77	40.63	40.77	40.7	41.04	41.06	41.33	41.65	41.83	41.83	42.08	42.23	42.28	0.0765385
B	28.9	28.52	43.05	41.46	40.77	39.15	42.37	39.98	41.41	38.75	38.85	34.18		28.9	28.52	0.17	-1.4					810.36	42.57	42.52	42.81	42.82	42.66	41.78	42.4	41.87	41.62	42.03	41.67	42.01	43.06	-0.0234341
C	29.06	28.93	44.87	42.13	42.81	38.85	38.33	36.94	43.4	41.01	42.91	38.91		29.06	28.93	0.18	-1.39					810.37	39.98	40.12	40.31	40.36	40.47	40.65	40.93	41.14	40.87	40.99	40.93	40.97	40.72	0.0394231
D	29.15	28.58	45.26	42.61	40.31	38.49	42.71	40.45	44.05	41.21	42.38	39.4		29.15	28.58	0.37	-1.21					810.38	42.93	42.91	42.99	42.89	42.89	43.73	42.54	42.71	42.83	43.81	44.01	42.9	42.87	0.014533
E	29.69	28.81	47.98	42.41	42.99	40.67	43.28	42.08	43.1	41.3	42.91	40.26		29.69	28.81	1.05	-1.16					810.39	41.29	41.48	41.73	41.87	42.19	42.38	42.65	42.55	43.14	43.41	43.71	43.53	43.66	0.107363
F	30.67	28.6	46.17	42.31	41.73	39.73	39.61	36.34	41.55	38.93	42.01	39.33		30.67	28.6	1.74	-1.49					810.4	43.74	43.7	43.81	43.64	43.84	43.72	43.9	43.69	43.88	43.68	43.66	43.74	43.52	-0.00425824
G	32.84	28.83	44.61	41.89	43.81	41.46	44.82	42.5	44.24	41.31	41.97	40.04		32.84	28.83	3.34	-1.5					810.14	41.59	41.45	41.72	41.62	41.58	41.48	41.83	42.63	41.79	41.56	41.89	41.82	42.03	0.018022
H	35.19	28.87	44.79	41.96	41.72	39.57	46.43	43.21	43.86	41.27	41.89	40.6		35.19	28.87	5.37	-0.49					810.15	43.76	43.95	43.2	43.8	43.7	43.74	43.76	44.02	44.03	43.98	43.34	44.12	44.03	0.0123901
Measurement count: 12 Ex: 485 Em: 527 Scaling Factor : 1/1																						810.32	42.46	42.55	42.37	42.33	42.29	42.36	42.5	42.33	42.47	42.66	42.77	42.78	42.8	0.0167857
	1	2	3	4	5	6	7	8	9	10	11	12										810.33	38.24	38.27	38.33	38.42	38.48	38.77	38.89	39.03	39.19	39.14	39.38	39.51	39.67	0.0626923
A	28.54	28.53	41.33	38.61	40.53	38.88	43.8	41.13	45.23	41.94	44.63	39.64		28.54	28.53	-0.03	-1.23					810.34	43.18	42.8	42.71	42.5	42.49	42.1	42.22	41.74	42.07	41.9	41.82	41.68	41.98	-0.0531868
B	28.92	28.51	43.07	41.25	40.7	39.22	42.33	40.1	41.21	38.57	39.53	34.19		28.92	28.51	0.19	-1.41					810.26	43.55	43.22	43.28	43.13	43.3	43.22	43.64	43.26	43.31	43.04	43.16	43.21	43.35	-0.00532967
C	29.12	28.95	44.58	42.08	42.82	38.9	38.42	36.97	43.63	41.04	42.97	38.94		29.12	28.95	0.24	-1.37					810.27	39.33	39.33	39.61	39.43	39.83	39.51	40.36	40.5	40.96	40.65	41.39	41.58	42.36	0.119396
D	29.21	28.64	45.01	42.35	40.36	38.56	42.5	40.41	43.88	41.09	42.07	38.93		29.21	28.64	0.43	-1.15					810.28	44.93	44.93	44.82	44.85	44.92	44.87	44.81	44.65	44.89	44.74	45.01	44.72	45.23	0.00247253
E	29.91	28.81	46.98	42.05	42.89	40.56	43.13	42	42.77	41.11	42.61	39.97		29.91	28.81	1.27	-1.16					810.29	46.55	46.52	46.43	45.98	46.03	46.09	46.29	46.19	46.23	46.09	46.38	46.24	46.57	-0.00178571
F	30.92	28.58	45.96	42.07	41.87	39.69	39.43	36.4	41.96	38.58	41.94	39.33		30.92	28.58	1.99	-1.51					810.3	44.89	45.01	44.86	45.23	45.21	45.21	45.55	45.34	45.64	45.63	45.84	45.98	46.33	0.0538462
G	33.42	28.9	44.76	42.05	43.64	41.25	44.85	42.24	44.29	41.32	41.61	39.85		33.42	28.9	3.92	-1.43					810.5	41.19	41.08	41.41	41.21	41.35	41.35	41.3	41.52	41.44	41.18	41.35	41.21	41.43	0.0057967
H	36.01	29.04	44.84	41.87	41.62	39.37	45.98	42.98	43.82	41.34	42.09	40.58		36.01	29.04	6.19	-0.32					810.6	43.2	43.51	43.4	43.63	43.53	43.58	43.92	43.69	44.17	43.48	44.28	43.91	44.67	0.041978
Measurement count: 13 Ex: 485 Em: 527 Scaling Factor : 1/1																						810.7	44.24	44.07	44.05	43.88	44.04	42.87	42.91	42.8	42.77	42.65	42.75	42.61	42.58	-0.079011
	1	2	3	4	5	6	7	8	9	10	11	12										810.8	43.18	42.84	43.1	42.77	43.07	42.69	43.11	42.73	42.88	42.73	42.89	42.72	42.83	-0.010989
A	28.66	28.68	41.41	38.93	40.65	38.95	43.7	40.89	45.21	41.86	44.85	39.45		28.66	28.68	0.09	-1.08					810.11	41.15	41.25	41.55	41.96	42.27	41.89	42.53	42.23	42.18	42.38	42.39	42.38	42.06	0.0436538
B	28.94	28.64	44.28	41.67	41.04	39.27	42.29	39.8	41.35	38.56	38.37	34.23		28.94	28.64	0.21	-1.28					810.21	44.33	44.5	44.24	44.29	44.25	44.19	44.3	44.2	44.3	44.24	44.34	44.25	44.35	-0.00211538
C	29.18	29.02	44.75	42.1	42.66	38.93	38.48	37.12	43.53	41.14	42.89	39.19		29.18	29.02	0.3	-1.3					810.22	43.69	43.72	43.86	43.82	43.96	43.82	44.06	43.85	44.02	44	44.15	44.06	44.18	0.0178297
D	29.31	28.66	45.08	42.26	40.47	38.48	42.49	40.31	44.04	41.27	42.41	39.6		29.31	28.66	0.53	-1.13					810.23	44.45	44.52	44.69	44.63	44.85	44.78	45.09	44.95	45.27	44.02	45.21	43.31	43.64	-0.026511
E	30.01	28.93	47.42	42.05	42.89	40.37	43.3	42.22	43.07	41.24	42.6	40.11		30.01	28.93	1.37	-1.04					810.24	38.06	38.75	38.85	39.53	38.37	38.77	38.83	39.2	39.14	39.29	39.09	39.38	39.25	0.0343407
F	31.14	28.77	45.92	41.93	42.19	39.63	39.83	36.67	42.27	38.82	42.02	39.55		31.14	28.77	2.21	-1.32					810.25	42.43	42.52	42.91	42.97	42.89	43.05	43.22	43.4	43.33	43.21	44.49	44.55	43.43	0.0670879
G	33.92	28.98	44.44	41.95	43.84	41.29	44.92	42.23	44.25	41.12	41.54	39.9		33.92	28.98	4.42	-1.35					810.16	42.48	42.25	42.38	42.07	42.41	42.3	42.72	42.09	42.34	42.19	42.42	42.15	42.46	-0.00123626
H	36.85	29.21	44.76	41.89	41.58	39.55	46.03	44.43	43.96	41.36	42.32	40.69		36.85	29.21	7.03	-0.15					810.17	42.94	42.52	42.91	42.61	42.6	42.58	42.58	42.41	42.59	42.52	42.83	42.63	42.78	-0.00326923
Measurement count: 14 Ex: 485 Em: 527 Scaling Factor : 1/1																						810.18	42.2	42.16	42.01	41.94	42.02	42.06	42.11	41.61	41.87	41.98	41.79	41.84	41.89	-0.0136538
	1	2	3	4	5	6	7	8	9	10	11	12										810.19	42.03	41.82	41.97	41.61	41.54	41.32	41.39	42.17	41.44	41.64	41.33	41.13	41.03	-0.0309615
A	28.71	28.68	41.66	39.24	40.72	38.93	43.74	40.86	45.21	41.73	44.78	40.05		28.71	28.68	0.14	-1.08					810.2	41.94	42.1	41.89	42.09	42.32	42.2	42.4	42.37	42.15	42.35	42.19	42.12	42.4	0.0128297
B	29.04	28.67	43.38	41.35	41.06	39.21	42.36	40.33	41.35	38.57	38.77	34.22		29.04	28.67	0.31	-1.25
C	29.23	29.25	44.99	42.26	41.78	39.18	38.77	36.91	43.58	40.89	43.05	39.35		29.23	29.25	0.35	-1.07
D	29.91	28.7	45.47	43.57	40.65	38.21	42.1	40.17	42.87	40.83	42.3	38.75		29.91	28.7	1.13	-1.09
E	30.11	28.89	44.64	41.62	43.73	40.55	43.22	40.63	42.69	41.01	42.58	39.78		30.11	28.89	1.47	-1.08					Samples + Deferiprone
F	31.46	28.81	46.23	41.67	42.38	39.89	39.51	36.54	41.89	38.13	42.06	40.22		31.46	28.81	2.53	-1.28					Time (min) ->	16	18	20	22	24	26	28	30	32	34	36	38	40	Slope Fxn
G	33.26	29.3	44.84	41.49	43.72	42.51	44.87	42.11	44.19	40.87	41.32	39.48		33.26	29.3	3.76	-1.03					810.46	38.17	38.14	38.36	38.61	38.93	39.24	39.5	39.55	39.88	39.87	40.18	40.15	40.53	0.102967
H	37.59	29.32	44.73	41.53	41.48	39.23	46.09	42.25	43.82	41.24	42.2	41.26		37.59	29.32	7.77	-0.04					810.47	41.69	41.49	41.46	41.25	41.67	41.35	41.81	41.44	41.55	41.39	41.85	41.2	41.68	0.000879121
Measurement count: 15 Ex: 485 Em: 527 Scaling Factor : 1/1																						810.48	42.19	42.19	42.13	42.08	42.1	42.26	41.89	42.06	42.11	42.1	42.13	41.96	42	-0.00662088
	1	2	3	4	5	6	7	8	9	10	11	12										810.49	42.59	42.63	42.61	42.35	42.26	43.57	42.18	41.7	43.1	41.46	40.91	41.63	41.45	-0.0590659
A	28.8	28.84	41.69	39.5	40.86	39.04	43.76	40.93	45.55	42.13	45.09	39.64		28.8	28.84	0.23	-0.92					810.5	42.45	42.75	42.41	42.05	42.05	41.62	41.64	41.4	41.44	41.19	41.28	41.1	41.35	-0.0642582
B	29.17	28.7	44.61	41.81	41.33	39.57	42.5	39.92	41.3	38.47	38.83	34.28		29.17	28.7	0.44	-1.22					810.43	42.53	42.66	42.31	42.07	41.93	41.67	41.98	42.38	42.75	41.65	43.16	42.09	41.34	-0.0151099
C	29.37	29.2	44.7	41.89	42.4	39.24	38.89	37.1	43.92	41.19	43.22	39.37		29.37	29.2	0.49	-1.12					810.44	42.48	42.33	41.89	42.05	41.95	41.49	41.77	41.34	41.6	41.27	41.36	40.95	41.15	-0.055467
D	29.54	28.83	45.03	42.18	40.93	38.56	42.22	40.27	42.91	41	42.72	38.79		29.54	28.83	0.76	-0.96					810.45	41.96	41.78	41.96	41.87	41.89	41.53	41.68	41.06	41.16	41.15	41.11	41.03	40.97	-0.0471978
E	30.33	29.03	44.46	41.64	42.54	40.31	43.64	42.19	43.11	41.18	42.58	39.92		30.33	29.03	1.69	-0.94					810.53	39.28	38.95	39.03	38.88	38.95	38.93	39.04	38.91	39.05	38.95	39.07	39.04	39.08	-0.000549451
F	31.62	29.23	45.79	41.98	42.65	39.85	40.36	36.93	42.53	38.42	42.11	39.7		31.62	29.23	2.69	-0.86					810.54	39.36	39.1	39.15	39.22	39.27	39.21	39.57	39.51	39.67	39.87	39.9	39.87	40.11	0.0395604
G	34.07	29.35	44.55	41.77	43.9	41.2	44.81	42.15	44.3	40.87	41.39	39.48		34.07	29.35	4.57	-0.98					810.36	38.73	38.85	38.85	38.9	38.93	39.18	39.24	39.39	39.31	39.37	39.39	39.38	39.34	0.0298077
H	38.57	29.45	44.26	41.68	41.83	39.35	46.29	43.97	44.06	41.3	42.4	40.6		38.57	29.45	8.75	0.09					810.37	38.38	38.39	38.49	38.56	38.48	38.21	38.56	38.7	38.36	38.33	38.58	38.49	38.32	0.000164835
Measurement count: 16 Ex: 485 Em: 527 Scaling Factor : 1/1																						810.38	40.74	40.9	40.67	40.56	40.37	40.55	40.31	40.18	40.11	40.25	40.28	39.88	40.02	-0.0351648
	1	2	3	4	5	6	7	8	9	10	11	12										810.39	39.28	39.48	39.73	39.69	39.63	39.89	39.85	39.87	39.96	39.96	40.14	40.43	40.65	0.0441209
A	28.84	28.81	41.89	39.55	40.84	38.91	44.02	40.63	45.34	41.79	44.95	39.63		28.84	28.81	0.27	-0.95					810.4	41.83	41.7	41.46	41.25	41.29	42.51	41.2	41.28	40.73	41.01	40.78	40.67	40.98	-0.0440659
B	29.13	28.68	44.24	41.44	41.65	39.51	42.33	39.99	41.52	38.35	39.2	34.54		29.13	28.68	0.4	-1.24					810.14	39.75	39.51	39.57	39.37	39.55	39.23	39.35	39.1	39.24	39.08	39.19	39.04	39.08	-0.0261264
C	29.28	29.09	44.62	42.06	41.87	39.39	39.03	37.08	43.69	41.51	43.4	39.34		29.28	29.09	0.4	-1.23					810.15	41.16	41.28	40.86	41.13	40.89	40.86	40.93	40.63	40.72	40.64	40.68	40.71	40.75	-0.0221703
D	29.43	28.84	44.84	41.7	41.14	38.7	41.74	39.86	42.8	40.63	42.09	38.63		29.43	28.84	0.65	-0.95					810.32	40.14	40.17	39.98	40.1	39.8	40.33	39.92	39.99	39.71	40.06	39.98	40.07	39.91	-0.00692308
E	30.46	29.08	44.57	41.4	42.71	40.18	43.26	40.54	42.73	41.02	42.41	39.66		30.46	29.08	1.82	-0.89					810.33	36.93	36.9	36.94	36.97	37.12	36.91	37.1	37.08	37.18	37.24	37.33	37.36	37.49	0.0228571
F	31.72	29.13	45.66	42.38	42.55	39.87	40.5	36.78	42.23	37.81	41.61	40.02		31.72	29.13	2.79	-0.96					810.34	40.76	40.67	40.45	40.41	40.31	40.17	40.27	39.86	40.12	39.89	39.78	39.81	39.87	-0.0400275
G	34.29	29.45	44.35	41.34	43.69	41.28	44.65	41.94	44.2	40.66	42.17	39.34		34.29	29.45	4.79	-0.88					810.26	42.55	40.87	42.08	42	42.22	40.63	42.19	40.54	40.64	40.56	40.54	40.33	40.49	-0.0790934
H	39.26	29.68	44.14	41.06	42.63	39.1	46.19	42.05	43.85	41.28	42.37	40.5		39.26	29.68	9.44	0.32					810.27	36.03	36.07	36.34	36.4	36.67	36.54	36.93	36.78	37.17	37.4	37.69	37.54	37.9	0.0775
Measurement count: 17 Ex: 485 Em: 527 Scaling Factor : 1/1																						810.28	42.59	42.4	42.5	42.24	42.23	42.11	42.15	41.94	42.07	41.83	41.74	41.72	41.69	-0.0372527
	1	2	3	4	5	6	7	8	9	10	11	12										810.29	43.07	42.84	43.21	42.98	44.43	42.25	43.97	42.05	42.03	41.92	41.95	41.71	42.93	-0.0541484
A	28.97	28.87	42	39.88	40.9	39.05	44.03	40.72	45.64	42.27	45.27	40.19		28.97	28.87	0.4	-0.89					810.3	41.76	41.86	41.87	41.94	41.86	41.73	42.13	41.79	42.27	41.74	42.38	41.71	42.48	0.0161813
B	29.3	28.88	43.62	41.55	41.83	39.67	42.47	39.71	41.44	38.35	39.14	34.42		29.3	28.88	0.57	-1.04					810.5	38.63	38.54	38.75	38.57	38.56	38.57	38.47	38.35	38.35	38.12	38.22	38.11	38.15	-0.0251099
C	29.44	29.48	44.87	42.11	41.62	39.31	39.19	37.18	44.17	41.29	43.33	39.57		29.44	29.48	0.56	-0.84					810.6	41.06	41.05	41.01	41.04	41.14	40.89	41.19	41.51	41.29	41.25	41.76	41.62	41.3	0.0242857
D	30.31	28.86	44.85	43.1	40.87	38.36	42.07	40.12	42.77	40.87	42.34	38.73		30.31	28.86	1.53	-0.93					810.7	41.3	41.21	41.21	41.09	41.27	40.83	41	40.63	40.87	40.5	40.63	40.58	40.54	-0.0351648
E	30.65	29.12	44.43	41.44	42.83	40.11	43.31	40.64	42.88	41.15	42.59	39.75		30.65	29.12	2.01	-0.85					810.8	41.33	41.2	41.3	41.11	41.24	41.01	41.18	41.02	41.15	40.76	42.06	40.71	40.89	-0.00898352
F	32.08	29.18	45.96	42.75	43.14	39.96	40.96	37.17	42.18	38.15	41.87	40.17		32.08	29.18	3.15	-0.91					810.11	39.12	38.88	38.93	38.58	38.82	38.13	38.42	37.81	38.15	37.94	37.99	38.19	38.42	-0.0411813
G	34.89	29.59	44.01	41.6	43.88	40.73	44.89	42.07	44.3	40.64	41.44	39.26		34.89	29.59	5.39	-0.74					810.21	41.35	41.27	41.31	41.32	41.12	40.87	40.87	40.66	40.64	40.52	40.73	40.4	40.66	-0.0395055
H	39.86	30.2	44.08	41.16	41.79	39.24	46.23	42.03	44.02	41.07	42.15	40.6		39.86	30.2	10.04	0.84					810.22	41.22	41.29	41.27	41.34	41.36	41.24	41.3	41.28	41.07	41.97	41.25	40.93	41.12	-0.0031044
Measurement count: 18 Ex: 485 Em: 527 Scaling Factor : 1/1																						810.23	38.86	39.29	39.28	39.64	39.45	40.05	39.64	39.63	40.19	39.64	39.76	39.73	39.81	0.0298901
	1	2	3	4	5	6	7	8	9	10	11	12										810.24	34.09	34.19	34.18	34.19	34.23	34.22	34.28	34.54	34.42	34.77	34.64	34.72	34.81	0.0309066
A	28.98	28.9	42.11	39.87	40.65	38.95	43.98	40.64	45.63	41.74	44.02	39.64		28.98	28.9	0.41	-0.86					810.25	38.59	38.59	38.91	38.94	39.19	39.35	39.37	39.34	39.57	39.5	39.59	39.46	39.69	0.0442308
B	29.26	28.76	44.21	41.39	41.83	39.87	42.66	40.06	41.18	38.12	39.29	34.77		29.26	28.76	0.53	-1.16					810.16	39.61	39.11	39.4	38.93	39.6	38.75	38.79	38.63	38.73	38.55	38.64	38.47	38.6	-0.042033
C	29.51	29.25	44.52	42.1	42.03	39.37	39.14	37.24	43.48	41.25	43.21	39.5		29.51	29.25	0.63	-1.07					810.17	40.6	40.21	40.26	39.97	40.11	39.78	39.92	39.66	39.75	39.46	39.6	39.59	39.56	-0.0394231
D	29.61	28.87	44.42	41.46	40.99	38.33	41.9	39.89	42.65	40.5	42.19	38.55		29.61	28.87	0.83	-0.92					810.18	39.11	39.28	39.33	39.33	39.55	40.22	39.7	40.02	40.17	40.1	40.26	40.05	40.07	0.0458242
E	30.82	29.12	43.94	41.19	43.81	40.25	43.04	40.56	42.73	40.76	42.52	39.46		30.82	29.12	2.18	-0.85					810.19	40.2	40.05	40.04	39.85	39.9	39.48	39.48	39.34	39.26	39.21	39.07	38.99	39.02	-0.0538462
F	32.46	29.15	45.88	41.65	43.41	39.96	40.65	37.4	42.38	37.94	41.98	40.1		32.46	29.15	3.53	-0.94					810.2	40.42	40.77	40.6	40.58	40.69	41.26	40.6	40.5	40.6	40.53	40.57	40.74	40.43	-0.00357143
G	35.35	29.63	43.81	41.27	43.68	41.01	44.74	41.83	44.24	40.52	41.64	39.21		35.35	29.63	5.85	-0.7
H	40.39	30.04	43.83	41.15	41.56	39.08	46.09	41.92	44	41.97	42.35	40.53		40.39	30.04	10.57	0.68
Measurement count: 19 Ex: 485 Em: 527 Scaling Factor : 1/1
	1	2	3	4	5	6	7	8	9	10	11	12
A	29.09	29.02	42.28	40.18	40.85	39.07	43.34	40.68	45.84	42.38	45.21	39.76		29.09	29.02	0.52	-0.74
B	29.4	28.85	43.69	41.85	42.08	39.9	42.77	39.98	41.35	38.22	39.09	34.64		29.4	28.85	0.67	-1.07
C	29.6	29.27	44.38	42.13	41.67	39.39	39.38	37.33	44.28	41.76	44.49	39.59		29.6	29.27	0.72	-1.05
D	29.97	28.97	44.33	40.91	40.93	38.58	41.82	39.78	42.75	40.63	42.42	38.64		29.97	28.97	1.19	-0.82
E	31.06	29.23	44.04	41.28	44.01	40.28	43.16	40.54	42.89	42.06	42.83	39.6		31.06	29.23	2.42	-0.74
F	32.53	29.31	45.48	43.16	43.71	40.14	41.39	37.69	42.39	37.99	41.79	40.26		32.53	29.31	3.6	-0.78
G	36.02	29.9	43.46	41.36	43.66	40.78	45.01	41.74	44.34	40.73	41.33	39.07		36.02	29.9	6.52	-0.43
H	41.03	30.78	43.56	41.11	41.89	39.19	46.38	41.95	44.15	41.25	42.19	40.57		41.03	30.78	11.21	1.42
Measurement count: 20 Ex: 485 Em: 527 Scaling Factor : 1/1
	1	2	3	4	5	6	7	8	9	10	11	12
A	29.12	28.94	42.26	40.15	41.08	39.04	44.12	40.71	45.98	41.71	43.31	39.73		29.12	28.94	0.55	-0.82
B	29.4	28.82	44.13	41.2	42.23	39.87	42.78	40.07	41.21	38.11	39.38	34.72		29.4	28.82	0.67	-1.1
C	29.66	29.21	44.48	41.96	42.01	39.38	39.51	37.36	43.91	41.62	44.55	39.46		29.66	29.21	0.78	-1.11
D	29.87	28.95	44.08	41.63	40.97	38.49	41.68	39.81	42.61	40.58	42.15	38.47		29.87	28.95	1.09	-0.84
E	31.17	29.16	43.94	41.1	42.9	39.88	43.21	40.33	42.72	40.71	42.63	39.59		31.17	29.16	2.53	-0.81
F	32.94	29.37	45.41	42.09	43.53	40.43	41.58	37.54	42.38	38.19	41.84	40.05		32.94	29.37	4.01	-0.72
G	36.53	29.94	43.43	40.95	43.74	40.67	44.72	41.72	44.25	40.4	41.13	38.99		36.53	29.94	7.03	-0.39
H	41.38	30.93	43.23	41.03	41.82	39.04	46.24	41.71	44.06	40.93	42.12	40.74		41.38	30.93	11.56	1.57
Measurement count: 21 Ex: 485 Em: 527 Scaling Factor : 1/1
	1	2	3	4	5	6	7	8	9	10	11	12
A	29.23	29.07	42.6	40.53	41.18	39.08	44.03	40.75	46.33	42.48	43.64	39.81		29.23	29.07	0.66	-0.69
B	29.47	28.99	43.71	41.68	42.28	40.11	42.8	39.91	41.43	38.15	39.25	34.81		29.47	28.99	0.74	-0.93
C	29.78	29.43	44.46	42	43.06	39.34	39.67	37.49	44.67	41.3	43.43	39.69		29.78	29.43	0.9	-0.89
D	30.23	29.04	44.19	41.45	40.72	38.32	41.98	39.87	42.58	40.54	42.46	38.6		30.23	29.04	1.45	-0.75
E	31.36	29.44	45.35	41.35	42.87	40.02	43.35	40.49	42.83	40.89	42.78	39.56		31.36	29.44	2.72	-0.53
F	33.44	29.66	45.65	41.34	43.66	40.65	42.36	37.9	42.06	38.42	41.89	40.07		33.44	29.66	4.51	-0.43
G	37.51	30.01	43.61	41.15	43.52	40.98	45.23	41.69	44.35	40.66	41.03	39.02		37.51	30.01	8.01	-0.32
H	42.07	30.59	43.29	40.97	42.03	39.08	46.57	42.93	44.18	41.12	42.4	40.43		42.07	30.59	12.25	1.23
[truncated: 6 more columns]

## Sheet: 809 Serum NTBI 
														Average -Def	Average +Def	Zeroed -Def	Zeroed +Def
Measurement count: 1 Ex: 485 Em: 527 Scaling Factor : 1/1																					C/C -Deferiprone																									810
	1	2	3	4	5	6	7	8	9	10	11	12									Time (min)	16	18	20	22	24	26	28	30	32	34	36	38	40	Slope Fxn	Fe (uM)	Slopes -Def	Slopes +Def	Difference	Mcalibr	Samples Slopes -Def	Samples Slopes +Def	LPI (uM)
A	27.48	29.59	43.8	42.68	45.44	44.52	43.49	43.31	45.32	44.35	45.46	43.56		27.48	29.59	0	0					-0.35	-0.21	-0.17	-0.06	0.1	0.12	0.27	0.31	0.45	0.44	0.63	0.6	0.72	0.0441209	0	0.0441209	0.0253297	0.0187912	0.0577671	0.0524176	0.0270604	0.438955		0.383313	WT ND		0	1.44
B	27.3	28.72	43.82	44.02	45.07	43.27	41.28	41.36	43.29	41.95	42.87	41.31		27.3	28.72	0	0					-0.01	0.06	0.25	0.25	0.41	0.51	0.61	0.62	0.81	0.74	0.92	0.9	1.05	0.0429121	0.078125	0.0429121	0.0347802	0.00813187		0.0623352	0.0514835	0.187852					0.078125	1.29
C	27.78	28.73	44.38	42.66	44.36	42.99	43.33	42.06	43.41	40.78	43.19	41.86		27.78	28.73	0	0					-0.1	-0.1	0.13	0.08	0.24	0.24	0.38	0.4	0.62	0.5	0.73	0.7	0.89	0.0398901	0.15625	0.0398901	0.0353022			-0.0667308	-0.0442308	0					0.15625
D	27.62	28.23	44.94	43.43	44.39	44.56	43.94	42.6	43.09	41.78	43.08	42.75		27.62	28.23	0	0					0.18	0.26	0.45	0.78	0.64	0.68	1.18	1.2	1.07	1.26	1.67	1.31	2.22	0.0692033	0.3125	0.0692033	0.0392857	0.0299176		0.0549451	-0.0195604	1.28976					0.3125	2
E	27.57	28.15	44.62	43.32	45.07	44.51	44.12	43.06	44.13	42.7	42.91	40.55		27.57	28.15	0	0					0.5	0.6	0.73	0.91	1.07	1.23	1.39	1.52	1.77	1.8	2.08	2.15	2.53	0.0815659	0.625	0.0815659	0.0427198	0.0388462		-0.0938187	-0.0243132	0					0.625	2.3
F	27.91	27.81	44.17	43.3	44.25	42.01	43.55	42.85	44.07	42.58	42.73	40.74		27.91	27.81	0	0					0.64	0.87	1.09	1.29	1.42	1.68	1.96	2.14	2.53	2.75	3.11	3.28	3.73	0.125632	1.25	0.125632	0.0151099			-0.00291209	-0.0313462	0.492219		0.338228	WT ND Hep		1.25	3.44
G	28.06	28.08	43.68	42.24	42.41	41.21	43	42.24	41.56	40.57	43.01	41.8		28.06	28.08	0	0					1.34	1.64	2	2.41	2.85	3.16	3.72	4.13	4.76	5.14	5.72	6.16	6.98	0.231593	2.5	0.231593	0.0624451	0.169148		0.0243407	-0.0407967	1.12759					2.5	6.08
H	27.93	28.43	44.05	41.93	42.39	41.66	43.47	41.38	42.57	42.14	42.53	41.69		27.93	28.43	0	0					2.82	3.34	4.06	4.62	5.46	6.27	7.24	7.94	8.89	9.64	10.53	11.04	11.88	0.391016	5	0.391016	0.0965659	0.294451		-0.0111813	0.0226374	0					5	10.53
Measurement count: 2 Ex: 485 Em: 527 Scaling Factor : 1/1																																									0.0579396	0.0538187	0.0713361
	1	2	3	4	5	6	7	8	9	10	11	12																													-0.0107967	0.0456319	0
A	27.07	28.99	43.3	42.32	44.86	44.16	42.63	42.47	44.42	43.91	44.71	43.17		27.07	28.99	-0.41	-0.6																								0.0100824	-0.0147802	0.430394		0.458263	WT CID
B	26.77	28.39	43.13	42.12	44.23	42.57	41.81	40.81	42.58	41.12	42.11	40.55		26.77	28.39	-0.53	-0.33																								0.00557692	0.0126648	0
C	27.45	28.4	43.68	42.13	43.72	41.74	42.52	41.2	43.46	40.18	42.67	41.66		27.45	28.4	-0.33	-0.33																								0.0639835	0.00752747	0.977304
D	27.27	28.05	44.04	42.38	42.93	43.52	43.03	41.91	42.53	41.36	42.88	42.26		27.27	28.05	-0.35	-0.18																								0.101264	0.0676099	0.582578
E	27.12	27.81	45.12	42.37	43.66	43.38	43.26	41.95	43.59	42.25	42.87	40.17		27.12	27.81	-0.45	-0.34																								-0.0082967	-0.0256868	0.301038
F	27.33	27.71	43.52	42.56	43.37	41.29	42.63	41.74	43.31	42.16	42.66	40.52		27.33	27.71	-0.58	-0.1																								0.114451	0.0791484	0.611113		0.501826	WT CID Hep
G	27.78	27.78	43.21	41.84	42.82	41.22	42.05	41.22	41.31	40.22	42.39	41.59		27.78	27.78	-0.28	-0.3																								0.061511	0.0251923	0.628709
H	27.49	27.37	43.37	41.67	42	41.47	42.8	40.21	42.29	41.35	42.81	41.31		27.49	27.37	-0.44	-1.06																								0.026978	0.00164835	0.438479
Measurement count: 3 Ex: 485 Em: 527 Scaling Factor : 1/1																																									0.0147527	-0.0332418	0.830828
	1	2	3	4	5	6	7	8	9	10	11	12																													-0.0136813	0.00112637	0
A	26.48	27.66	41.43	40.61	42.97	42.34	42.28	41.25	43.13	42.18	42.9	41.21		26.48	27.66	-1	-1.93																								0.0147527	0.00260989	0.210204		0.453602	KO ND
B	26.16	27.1	41.3	40.41	43.85	41.8	41.65	41.28	42.89	41.53	41.43	39.96		26.16	27.1	-1.14	-1.62																								0.0259066	0.0534615	0
C	26.61	27.11	44.39	42.69	43.86	42.13	42.77	40.86	43.69	40.35	41.37	40.37		26.61	27.11	-1.17	-1.62																								0.107033	0.13478	0
D	26.63	26.84	41.98	40.48	40.88	41.17	41.43	39.95	42.65	41.73	43.01	42.48		26.63	26.84	-0.99	-1.39																								0.117363	0.0463462	1.22936
E	26.81	26.66	43.34	41.12	41.49	41.53	41.25	40.84	41.85	40.48	40.98	38.57		26.81	26.66	-0.76	-1.49																								0.0854945	0.0376374	0.82845
F	27.27	26.92	42.18	40.8	41.21	39.6	41.11	39.84	41.52	40.52	42.9	40.4		27.27	26.92	-0.64	-0.89																								-0.00337912	-0.00104396	0		0.149996	KO ND Hep
G	27.71	26.81	43.1	43.21	43.29	41.21	40.43	39.33	41.43	39.92	40.93	39.85		27.71	26.81	-0.35	-1.27																								0.000412088	0.00214286	0
H	27.96	26.37	41.87	39.91	40.21	39.95	41.05	38.37	40.45	39.74	44.17	41.39		27.96	26.37	0.03	-2.06																								-0.0168132	-0.0176099	0.0137916
Measurement count: 4 Ex: 485 Em: 527 Scaling Factor : 1/1																																									0.0418132	0.0395055	0.0399482
	1	2	3	4	5	6	7	8	9	10	11	12																													0.106538	0.0663187	0.69624
A	26.63	27.79	41.46	40.58	43.03	42.17	42.72	41.54	43.16	42.28	42.99	41.19		26.63	27.79	-0.85	-1.8																								-0.0159341	-0.0529396	0.640598		0.296092	KO IDD
B	26.34	27.17	41.34	41.12	44.38	42.34	41.24	40.88	42.57	41.23	41.74	41.1		26.34	27.17	-0.96	-1.55																								0.0812363	0.0424176	0.671986
C	26.66	27.23	43.38	42.45	43.63	42.9	42.81	41.08	42.39	39.89	41.65	40.39		26.66	27.23	-1.12	-1.5																								0.0404945	0.0470879	0
D	26.73	26.92	41.89	40.51	41	40.85	41.56	40.21	42.17	41.48	43.03	42.34		26.73	26.92	-0.89	-1.31																								0.0229396	0.0132418	0.167878
E	26.89	26.77	43.51	41.53	41.43	41.38	41.22	40.14	41.97	40.55	41.16	38.58		26.89	26.77	-0.68	-1.38																								0.0418407	0.0646703	0
F	27.4	26.61	42.18	40.7	41.25	39.7	41.27	39.86	41.64	40.31	42.84	40.73		27.4	26.61	-0.51	-1.2																								-0.0260714	-0.0366209	0.18262		0.0483183	KO IDD Hep
G	28.07	26.85	44.46	42.37	43.1	41.48	40.5	39.34	41.63	40.19	40.86	39.71		28.07	26.85	0.01	-1.23																								0.071511	0.0732692	0
H	28.35	27.24	41.73	39.83	39.97	39.76	41.07	38.35	40.43	39.93	43.18	41.92		28.35	27.24	0.42	-1.19																								-0.0518407	-0.0521978	0.00618246
Measurement count: 5 Ex: 485 Em: 527 Scaling Factor : 1/1																																									0.0101374	0.0389835	0
	1	2	3	4	5	6	7	8	9	10	11	12																													-0.0543956	-0.0574451	0.0527887
A	26.64	27.79	41.17	40.44	42.58	41.73	43.56	41.31	42.39	41.17	42.11	40.28		26.64	27.79	-0.84	-1.8																										0
B	26.51	27.25	40.91	40.26	44.03	41.93	41.47	41.07	43.7	41.5	41.82	40.3		26.51	27.25	-0.79	-1.47
C	26.96	27.19	44.22	42.3	43.66	42.21	42.86	41.09	42.79	40.29	41.89	39.55		26.96	27.19	-0.82	-1.54
D	27.01	26.87	41.58	40.08	41.33	40.46	41.18	39.44	42.47	41.71	43.3	42.64		27.01	26.87	-0.61	-1.36
E	27.2	26.84	43.95	41.11	40.81	40.58	42.51	39.68	41.25	39.67	40.44	38.6		27.2	26.84	-0.37	-1.31				C/C +Deferiprone
F	27.49	26.72	42.13	40.23	40.55	39.12	40.53	39.33	40.74	39.7	42.85	40.88		27.49	26.72	-0.42	-1.09				Time (min)	16	18	20	22	24	26	28	30	32	34	36	38	40	Slope Fxn	Fe (uM)
G	28.22	26.9	43.81	42.57	43.39	42.01	39.97	39.83	42.08	40.41	40.13	39.23		28.22	26.9	0.16	-1.18					-1.34	-1.32	-1.16	-1.16	-1.05	-1.08	-0.91	-0.94	-0.82	-0.88	-0.77	-0.82	-0.72	0.0253297	0
H	28.7	26.6	41.66	39.56	40.05	39.71	41.27	38.03	40	39.63	43.51	41.93		28.7	26.6	0.77	-1.83					-1.07	-1.09	-0.88	-0.91	-0.79	-0.78	-0.6	-0.6	-0.46	-0.46	-0.37	-0.4	-0.24	0.0347802	0.078125
Measurement count: 6 Ex: 485 Em: 527 Scaling Factor : 1/1																						-0.98	-0.94	-0.76	-0.78	-0.57	-0.63	-0.4	-0.46	-0.33	-0.35	-0.19	-0.27	-0.1	0.0353022	0.15625
	1	2	3	4	5	6	7	8	9	10	11	12										-0.76	-0.75	-0.54	-0.5	-0.3	-0.28	-0.11	-0.21	0.02	-0.09	0.13	0.01	0.22	0.0392857	0.3125
A	26.8	27.93	41.1	40.24	42.39	41.65	43.5	41.83	42.32	41.15	42.02	40.07		26.8	27.93	-0.68	-1.66					-0.85	-0.81	-0.58	-0.59	-0.41	-0.38	-0.16	-0.26	-0.05	-0.06	0.03	0.03	0.23	0.0427198	0.625
B	26.77	27.23	40.87	40.11	43.74	42.44	41.44	41.1	43.4	41.52	42.3	40.74		26.77	27.23	-0.53	-1.49					-0.36	-0.59	-0.18	-0.93	-0.83	-0.88	-0.57	-0.5	-0.5	-0.65	-0.45	-0.43	0.29	0.0151099	1.25
C	27.11	27.22	45.95	42.43	43.64	41.89	42.4	41.15	42.54	40	41	39.38		27.11	27.22	-0.67	-1.51					-0.61	-0.53	-0.28	-0.24	-0.02	-0.01	0.23	0.26	0.58	0.52	0.7	0.67	0.9	0.0624451	2.5
D	27.05	26.94	41.57	41.1	41.15	40.36	41.46	39.83	42.61	41.57	43.31	42.32		27.05	26.94	-0.57	-1.29					-1.05	-1	-0.76	-0.35	-0.27	-0.05	0.03	0.12	0.48	0.61	0.94	0.88	1.35	0.0965659	5
E	27.31	26.91	43.99	41.82	40.77	40.45	41.33	39.58	41.05	39.65	41.6	38.11		27.31	26.91	-0.26	-1.24
F	27.87	26.86	43.2	40.43	40.31	39.15	41.88	39.2	40.69	39.71	42.9	40.84		27.87	26.86	-0.04	-0.95
G	28.47	26.95	44.24	42.74	43.7	41.98	40.05	38.59	41.89	40.52	39.94	38.95		28.47	26.95	0.41	-1.13
H	29.09	26.84	41.41	39.35	39.97	39.37	40.7	38.95	40.11	39.08	43.41	42.15		29.09	26.84	1.16	-1.59
Measurement count: 7 Ex: 485 Em: 527 Scaling Factor : 1/1
	1	2	3	4	5	6	7	8	9	10	11	12
A	26.89	27.94	40.87	40.13	42.17	41.37	43.71	41.99	41.77	40.53	41.47	39.55		26.89	27.94	-0.59	-1.65
B	26.99	27.43	40.9	40.06	44.09	42.27	41.54	41.21	43.6	41.78	42.38	40.85		26.99	27.43	-0.31	-1.29
C	27.36	27.43	45.99	42.67	43.68	41.94	42.48	41.23	42.9	40.28	41.43	39.11		27.36	27.43	-0.42	-1.3
D	27.36	27.18	41.35	40.95	41.48	40.23	41.76	39.4	42.94	41.77	43.45	42.51		27.36	27.18	-0.26	-1.05
E	27.62	27.02	44.21	41.92	40.5	39.97	41.95	39.5	40.64	39.3	41.13	37.7		27.62	27.02	0.05	-1.13
F	28.11	27.04	43.71	40.85	40.24	38.91	42.07	39.1	40.52	39.33	42.98	40.92		28.11	27.04	0.2	-0.77
G	28.8	27.14	44.4	43.01	43.96	42.3	40.07	38.47	42.12	40.73	39.79	38.74		28.8	27.14	0.74	-0.94
H	29.56	27	41.68	39.36	39.93	39.42	40.69	38.7	40.24	39.33	43.52	42.27		29.56	27	1.63	-1.43
Measurement count: 8 Ex: 485 Em: 527 Scaling Factor : 1/1
	1	2	3	4	5	6	7	8	9	10	11	12
A	27.03	28.07	40.79	39.8	42.21	41.31	44.02	41.93	41.79	40.46	41.6	39.68		27.03	28.07	-0.45	-1.52
B	27.14	27.45	40.87	39.89	44.27	42.18	41.84	41.26	43.8	41.84	42.5	40.9		27.14	27.45	-0.16	-1.27
C	27.52	27.51	45.7	42.56	43.69	42.05	42.53	41.03	42.88	40.25	41.76	39.07		27.52	27.51	-0.26	-1.22
D	27.57	27.27	41.21	40.73	41.68	40.33	41.89	39.68	42.97	41.79	43.46	42.43		27.57	27.27	-0.05	-0.96
E	27.86	27.09	44.11	42.07	40.53	39.87	41.94	39.39	40.68	39.04	41.37	37.59		27.86	27.09	0.29	-1.06
F	28.35	27.18	43.95	40.91	40.32	38.9	41.2	38.84	40.79	39.39	43.13	40.86		28.35	27.18	0.44	-0.63
G	29.32	27.12	44.09	43.06	43.92	42.26	40.26	38.35	42.06	40.67	39.79	38.36		29.32	27.12	1.26	-0.96
H	30.01	27.11	41.93	39.45	39.7	39.36	40.7	38.53	40.65	39.56	43.74	42.22		30.01	27.11	2.08	-1.32
Measurement count: 9 Ex: 485 Em: 527 Scaling Factor : 1/1
	1	2	3	4	5	6	7	8	9	10	11	12
A	27.13	28.25	40.73	39.79	42.49	41.46	43.54	41.96	41.56	40.02	41.67	40.39		27.13	28.25	-0.35	-1.34
B	27.29	27.65	40.8	39.62	44.31	42.27	41.74	41.25	43.76	41.82	42.58	41.06		27.29	27.65	-0.01	-1.07
C	27.68	27.75	45.03	42.9	43.85	42.16	42.69	41.41	42.98	40.53	42.2	39.11		27.68	27.75	-0.1	-0.98
D	27.8	27.47	41.23	39.98	41.9	40.67	42	39.51	43	42	43.41	42.7		27.8	27.47	0.18	-0.76
E	28.07	27.3	45.23	42.34	40.66	39.57	42.45	40.45	40.78	39.05	40.23	37.31		28.07	27.3	0.5	-0.85
F	28.55	27.45	44.12	41.49	40.57	38.74	41.6	38.76	40.84	39.1	42.78	41.28		28.55	27.45	0.64	-0.36
G	29.4	27.47	44.67	43.17	44.18	42.46	40.38	38.49	42.05	40.79	41.17	38.41		29.4	27.47	1.34	-0.61
H	30.75	27.38	42.99	40.11	40.82	39.64	41.04	37.53	41.3	40.33	43.72	42.21		30.75	27.38	2.82	-1.05
Measurement count: 10 Ex: 485 Em: 527 Scaling Factor : 1/1
	1	2	3	4	5	6	7	8	9	10	11	12										Samples - Deferiprone
A	27.27	28.27	40.62	39.41	42.65	41.42	44.14	41.89	41.82	39.85	41.8	39.8		27.27	28.27	-0.21	-1.32					Time (min) ->	16	18	20	22	24	26	28	30	32	34	36	38	40	Slope Fxn
B	27.36	27.63	40.8	39.51	44.46	42.24	41.68	41.05	43.63	41.88	42.45	40.92		27.36	27.63	0.06	-1.09					810.46	40.73	40.62	40.68	40.77	41.11	41.03	41.22	41.17	41.36	41.28	41.57	41.79	41.98	0.0524176
C	27.68	27.79	44.94	42.46	43.54	41.93	42.57	42.11	43.22	40.12	42.11	39		27.68	27.79	-0.1	-0.94					810.47	40.8	40.8	41.23	41.19	41.56	41.63	41.97	41.92	42.1	42.14	42.23	42.05	42.17	0.0623352
D	27.88	27.48	41.18	39.85	41.83	40.77	41.77	39.68	43.8	41.97	43.25	42.63		27.88	27.48	0.26	-0.75					810.48	45.03	44.94	44.96	44.58	44.39	44.26	44.46	44.08	43.96	43.88	43.72	43.61	43.44	-0.0667308
E	28.17	27.34	45.65	42.22	40.75	39.55	42.36	40.65	40.6	38.92	40.73	37.12		28.17	27.34	0.6	-0.81					810.49	41.23	41.18	41.32	41.31	41.43	41.33	41.77	41.57	41.95	41.92	42.26	42.21	42.56	0.0549451
F	28.78	27.22	43.94	42.74	40.86	38.48	41.69	38.51	40.96	38.92	42.8	41.01		28.78	27.22	0.87	-0.59					810.5	45.23	45.65	45.96	44.55	44.32	44.17	44.21	43.68	43.8	43.46	43.61	43.28	43.88	-0.0938187
G	29.7	27.55	44.35	43.01	44.07	42.41	40.55	38.57	41.81	40.5	40.67	38.12		29.7	27.55	1.64	-0.53					810.43	44.12	43.94	44.32	44.54	44.71	44.48	44.66	44.43	44.46	44.23	44.44	44.18	43.91	-0.00291209
H	31.27	27.43	43.24	40.26	39.84	39.76	41.24	37.62	41.45	40.34	43.54	42.03		31.27	27.43	3.34	-1					810.44	44.67	44.35	44.52	47.91	47.93	47.68	46.19	45.82	47.11	45.67	45.98	45.09	46.26	0.0243407
Measurement count: 11 Ex: 485 Em: 527 Scaling Factor : 1/1																						810.45	42.99	43.24	43.91	43.57	43.75	43.76	43.97	43.65	43.88	43.44	43.49	42.99	42.84	-0.0111813
	1	2	3	4	5	6	7	8	9	10	11	12										810.53	42.49	42.65	42.85	42.85	43.08	43.13	43.06	43.24	43.69	43.57	43.87	43.77	43.81	0.0579396
A	27.31	28.43	40.68	39.43	42.85	41.77	44.57	42.1	42.27	39.95	42.03	40.19		27.31	28.43	-0.17	-1.16					810.54	44.31	44.46	44.6	44.13	44.31	44.21	44.53	44.24	44.32	44.08	44.12	44.15	44.25	-0.0107967
B	27.55	27.84	41.23	39.69	44.6	42.34	41.6	41.07	43.48	41.75	42.67	41.16		27.55	27.84	0.25	-0.88					810.36	43.85	43.54	43.93	43.57	44.91	43.73	44.53	43.57	44.63	43.6	44.43	43.64	44.15	0.0100824
C	27.91	27.97	44.96	42.89	43.93	42.17	42.45	41.98	43.06	40.3	42.43	39.29		27.91	27.97	0.13	-0.76					810.37	41.9	41.83	42.18	41.87	42.23	42.14	42.31	42.11	42.3	41.99	42.12	42.01	42.05	0.00557692
D	28.07	27.69	41.32	39.87	42.18	40.93	41.92	40.02	43.13	41.95	43.45	42.73		28.07	27.69	0.45	-0.54					810.38	40.66	40.75	41.12	41.17	41.71	41.61	41.79	41.84	41.96	42.03	42.12	42.17	42.14	0.0639835
E	28.3	27.57	45.96	42.31	41.12	39.76	42.53	40.76	41.06	39.1	41.13	37.29		28.3	27.57	0.73	-0.58					810.39	40.57	40.86	41.3	41.33	41.87	41.95	42.6	42.57	42.74	42.81	43	42.86	42.78	0.101264
F	29	27.63	44.32	42.13	41.3	38.82	42.09	38.97	41.28	38.83	43.01	41.13		29	27.63	1.09	-0.18					810.4	44.18	44.07	44.31	44	44.11	44.07	44.39	43.96	44.36	44.03	44.22	43.55	44.09	-0.0082967
G	30.06	27.8	44.52	42.86	44.31	42.47	40.91	38.87	41.95	40.67	40.85	38.08		30.06	27.8	2	-0.28					810.14	40.82	39.84	41.36	40.06	40.72	40.94	41.64	41.58	42.31	42.57	42.78	42.51	42.7	0.114451
H	31.99	27.67	43.91	40.98	41.36	40	41.6	37.59	41.84	41.01	43.65	42.34		31.99	27.67	4.06	-0.76					810.15	43.54	44.14	44.57	44.86	44.16	44.8	45.05	45.17	45.14	45.01	45.52	45.01	45.45	0.061511
Measurement count: 12 Ex: 485 Em: 527 Scaling Factor : 1/1																						810.32	41.74	41.68	41.6	41.6	41.88	41.79	41.83	41.85	42.12	41.74	42.28	42.02	42.48	0.026978
	1	2	3	4	5	6	7	8	9	10	11	12										810.33	42.69	42.57	42.45	42.43	42.81	42.66	42.99	42.79	43.24	42.37	43.38	42.45	42.93	0.0147527
A	27.42	28.43	40.77	39.3	42.85	41.69	44.86	42.03	42.18	39.97	42	40.88		27.42	28.43	-0.06	-1.16					810.34	42	41.77	41.92	41.89	41.9	41.74	41.95	41.58	41.97	41.54	41.93	41.46	41.6	-0.0136813
B	27.55	27.81	41.19	39.4	44.13	42.16	41.6	40.94	43.59	41.69	42.7	41.03		27.55	27.81	0.25	-0.91					810.26	42.45	42.36	42.53	42.49	42.71	42.63	42.61	42.78	42.63	42.88	42.71	42.83	42.64	0.0147527
C	27.86	27.95	44.58	42.71	43.57	41.86	42.43	41.9	43.14	40.25	42.34	39.54		27.86	27.95	0.08	-0.78					810.27	41.6	41.69	42.09	41.97	42.29	42.16	42.4	42.37	42.42	42.15	42.29	42.23	42.42	0.0259066
D	28.4	27.73	41.31	39.64	41.87	40.99	41.89	40.05	42.81	41.68	43.2	42.42		28.4	27.73	0.78	-0.5					810.28	40.38	40.55	40.91	41.12	41.55	41.7	42.03	42.07	42.43	42.19	42.62	42.81	42.96	0.107033
E	28.48	27.56	44.55	41.98	41.17	39.77	42.49	40.11	41.21	39.17	41.11	37.38		28.48	27.56	0.91	-0.59					810.29	41.04	41.24	41.6	41.67	41.92	42.12	42.49	42.48	42.94	42.74	43.58	43.67	43.88	0.117363
F	29.2	26.88	44.54	42.12	41.33	38.94	41.97	39.06	42.53	39.13	42.82	40.86		29.2	26.88	1.29	-0.93					810.3	41.56	41.82	42.27	42.18	42.5	42.59	42.94	42.99	43.17	43.34	43.56	43.46	43.65	0.0854945
G	30.47	27.84	47.91	42.8	44	42.22	41.12	40.13	42.12	40.66	40.29	37.9		30.47	27.84	2.41	-0.24					810.5	43.76	43.63	43.48	43.59	43.46	43.46	43.63	43.38	43.57	43.48	43.52	43.39	43.76	-0.00337912
H	32.55	28.08	43.57	41.18	40.06	40.42	41.67	37.5	41.92	40.95	43.69	42.2		32.55	28.08	4.62	-0.35					810.6	42.98	43.22	43.06	43.14	43.12	42.97	43.02	43.04	43.07	42.9	43.02	43.12	43.24	0.000412088
Measurement count: 13 Ex: 485 Em: 527 Scaling Factor : 1/1																						810.7	43	43.8	43.13	42.81	42.97	42.72	42.78	42.93	42.94	42.61	42.86	42.87	43.01	-0.0168132
	1	2	3	4	5	6	7	8	9	10	11	12										810.8	40.78	40.6	41.06	41.21	41.49	41.53	41.89	41.68	41.92	41.74	41.75	41.78	41.44	0.0418132
A	27.58	28.54	41.11	39.46	43.08	41.97	44.16	42.24	42.5	40.49	42.29	41.09		27.58	28.54	0.1	-1.05					810.11	40.84	40.96	41.28	42.53	42.65	42.34	42.56	42.51	42.91	43.02	43.17	43.4	43.65	0.106538
B	27.71	27.93	41.56	39.73	44.31	43.38	41.88	41.05	43.46	41.93	43.7	41.3		27.71	27.93	0.41	-0.79					810.21	42.05	41.81	41.95	42.12	41.87	42.07	42.11	41.9	42.01	41.64	41.69	41.58	41.67	-0.0159341
C	28.02	28.16	44.39	42.58	44.91	42.44	42.81	41.33	43.12	40.51	42.91	39.87		28.02	28.16	0.24	-0.57					810.22	41.3	41.45	41.84	41.92	42.1	42.03	42.6	42.59	42.9	42.97	43.15	43.07	43.12	0.0812363
D	28.26	27.93	41.43	39.67	42.23	41.07	41.9	40.21	42.97	41.74	43.26	42.62		28.26	27.93	0.64	-0.3					810.23	41.67	41.8	42.03	42	42.29	42.31	42.52	42.45	42.68	42.56	42.68	42.52	42.66	0.0404945
E	28.64	27.74	44.32	41.98	41.71	39.76	42.71	40.07	41.49	39.52	41.31	37.83		28.64	27.74	1.07	-0.41					810.24	42.58	42.45	42.67	42.7	43.7	42.86	43.06	42.87	43.06	42.92	43.15	43.03	43.27	0.0229396
F	29.33	26.98	44.71	42	41.87	39.35	42.29	39.44	42.65	39.16	43.05	40.81		29.33	26.98	1.42	-0.83					810.25	42.2	42.11	42.43	42.34	42.91	42.52	42.67	42.78	43.14	43.03	43.14	42.89	43.15	0.0418407
G	30.91	28.06	47.93	42.63	44.11	42.31	41.55	39.3	41.87	40.77	40.7	38.26		30.91	28.06	2.85	-0.02					810.16	43.41	43.25	43.45	43.2	43.26	43.25	43.43	43.07	43.18	42.97	43.08	42.61	42.78	-0.0260714
H	33.39	28.16	43.75	41.59	40.72	40.68	41.92	37.79	42.1	41.23	43.78	42.43		33.39	28.16	5.46	-0.27					810.17	40.23	40.73	41.13	41.11	41.31	41.49	41.82	41.79	41.98	41.93	42.02	42.04	42.2	0.071511
Measurement count: 14 Ex: 485 Em: 527 Scaling Factor : 1/1																						810.18	42.78	42.8	43.01	42.82	43.05	42.64	42.71	42.41	42.33	42.28	41.98	41.78	41.72	-0.0518407
	1	2	3	4	5	6	7	8	9	10	11	12										810.19	41.17	40.67	40.85	40.29	40.7	40.54	41.02	40.83	40.93	40.71	41	41.03	41.05	0.0101374
A	27.6	28.51	41.03	39.35	43.13	41.94	44.8	42.2	42.59	40.35	42.31	41.02		27.6	28.51	0.12	-1.08					810.2	43.72	43.54	43.65	43.69	43.78	43.6	43.74	43.43	43.61	43.01	43.04	42.33	42.26	-0.0543956
B	27.81	27.94	41.63	39.69	44.21	42.35	41.79	41.1	43.46	41.77	42.86	41.09		27.81	27.94	0.51	-0.78
C	28.02	28.1	44.26	42.46	43.73	41.92	42.66	41.26	42.97	40.28	42.52	39.82		28.02	28.1	0.24	-0.63
D	28.3	27.95	41.33	39.57	42.14	40.97	41.74	40.21	42.72	41.73	43.25	42.58		28.3	27.95	0.68	-0.28
E	28.8	27.77	44.17	42.06	41.61	39.75	42.63	40.07	41.53	39.43	41.49	37.77		28.8	27.77	1.23	-0.38					Samples + Deferiprone
F	29.59	26.93	44.48	41.84	41.95	39.34	42.16	39.37	42.34	39.2	42.64	40.71		29.59	26.93	1.68	-0.88					Time (min) ->	16	18	20	22	24	26	28	30	32	34	36	38	40	Slope Fxn
G	31.22	28.07	47.68	42.65	44.07	42.2	41.7	40.46	42.07	40.75	40.54	38.36		31.22	28.07	3.16	-0.01					810.46	39.79	39.41	39.43	39.3	39.46	39.35	39.63	39.66	39.84	39.83	40.02	39.92	40.17	0.0270604
H	34.2	28.38	43.76	41.68	40.94	40.67	42.12	37.92	42.03	41.15	43.6	42.56		34.2	28.38	6.27	-0.05					810.47	39.62	39.51	39.69	39.4	39.73	39.69	40.4	40.21	40.54	40.3	40.46	40.45	40.64	0.0514835
Measurement count: 15 Ex: 485 Em: 527 Scaling Factor : 1/1																						810.48	42.9	42.46	42.89	42.71	42.58	42.46	42.4	42.26	42.19	42.06	42.02	41.83	41.81	-0.0442308
	1	2	3	4	5	6	7	8	9	10	11	12										810.49	39.98	39.85	39.87	39.64	39.67	39.57	39.53	39.34	39.59	39.33	39.58	39.45	39.54	-0.0195604
A	27.75	28.68	41.22	39.63	43.06	42.45	45.05	42.59	42.94	40.65	42.52	40.45		27.75	28.68	0.27	-0.91					810.5	42.34	42.22	42.31	41.98	41.98	42.06	41.83	41.65	41.93	41.67	42	41.55	41.87	-0.0243132
B	27.91	28.12	41.97	40.4	44.53	42.42	41.83	41.09	43.63	41.88	43.06	41.2		27.91	28.12	0.61	-0.6					810.43	41.49	42.74	42.13	42.12	42	41.84	41.94	41.7	41.95	41.56	41.85	41.39	41.22	-0.0313462
C	28.16	28.33	44.46	42.4	44.53	42.58	42.99	41.61	43.02	40.4	42.67	40.25		28.16	28.33	0.38	-0.4					810.44	43.17	43.01	42.86	42.8	42.63	42.65	42.43	42.43	42.79	42.02	42.51	42.04	42.11	-0.0407967
D	28.8	28.12	41.77	39.53	42.31	41.11	41.95	40.29	42.78	41.8	43.43	42.65		28.8	28.12	1.18	-0.11					810.45	40.11	40.26	40.98	41.18	41.59	41.68	41.73	41.53	41.58	41.31	41.14	40.86	40.84	0.0226374
E	28.96	27.99	44.21	41.83	41.79	40.02	42.61	40	41.89	39.83	41.82	38.13		28.96	27.99	1.39	-0.16					810.53	41.46	41.42	41.77	41.69	41.97	41.94	42.45	42.32	42.58	42.5	42.62	42.4	42.67	0.0538187
F	29.87	27.24	44.66	41.94	42.6	39.65	42.4	39.65	42.56	39.62	42.71	40.86		29.87	27.24	1.96	-0.57					810.54	42.27	42.24	42.34	42.16	43.38	42.35	42.42	43.11	43.37	43.13	43.12	43.08	43.21	0.0456319
G	31.78	28.31	46.19	42.43	44.39	42.42	42.03	40.95	42.11	40.87	41.02	38.59		31.78	28.31	3.72	0.23					810.36	42.16	41.93	42.17	41.86	42.44	41.92	42.58	41.56	42.47	41.54	42.32	41.49	41.74	-0.0147802
H	35.17	28.46	43.97	41.73	41.64	41.07	42.49	38.04	42.6	41.48	43.74	42.6		35.17	28.46	7.24	0.03					810.37	40.67	40.77	40.93	40.99	41.07	40.97	41.11	41.12	40.97	41.04	40.97	41.04	41.17	0.0126648
Measurement count: 16 Ex: 485 Em: 527 Scaling Factor : 1/1																						810.38	39.57	39.55	39.76	39.77	39.76	39.75	40.02	39.66	39.96	40.04	39.93	39.99	39.36	0.00752747
	1	2	3	4	5	6	7	8	9	10	11	12										810.39	38.74	38.48	38.82	38.94	39.35	39.34	39.65	39.71	39.89	39.83	39.9	40.01	40.16	0.0676099
A	27.79	28.65	41.17	39.66	43.24	42.32	45.17	42.29	42.99	40.58	42.45	41.01		27.79	28.65	0.31	-0.94					810.4	42.46	42.41	42.47	42.22	42.31	42.2	42.42	42.17	42.23	42.09	42.17	41.64	41.84	-0.0256868
B	27.92	28.12	41.92	40.21	44.24	43.11	41.85	41.01	43.38	41.67	42.87	40.98		27.92	28.12	0.62	-0.6					810.14	39.64	39.76	40	40.42	40.68	40.67	41.07	40.97	41.29	41.22	41.46	41.23	41.59	0.0791484
C	28.18	28.27	44.08	42.26	43.57	41.56	42.79	41.08	43.04	40.14	42.78	40.02		28.18	28.27	0.4	-0.46					810.15	41.96	41.89	42.1	42.03	42.24	42.2	42.59	42.29	42.49	42.11	42.56	42.29	42.71	0.0251923
D	28.82	28.02	41.57	39.34	42.11	41.12	41.58	39.89	42.93	41.57	43.07	42.38		28.82	28.02	1.2	-0.21					810.32	41.25	41.05	41.07	40.94	41.05	41.1	41.09	41.01	41.26	40.79	41.21	41.01	41.31	0.00164835
E	29.09	27.89	43.68	41.65	41.84	39.66	42.78	40.37	41.68	39.71	41.79	38.18		29.09	27.89	1.52	-0.26					810.33	41.41	42.11	41.98	41.9	41.33	41.26	41.61	41.08	41.55	40.73	41.48	40.8	41.36	-0.0332418
F	30.05	27.31	44.43	41.7	42.57	39.71	42.37	39.63	42.51	39.65	42.41	40.69		30.05	27.31	2.14	-0.5					810.34	39.51	39.68	40.02	40.05	40.21	40.21	40.29	39.89	39.85	40.01	39.82	40.07	39.58	0.00112637
G	32.19	28.34	45.82	42.43	43.96	42.17	42.07	40.91	41.9	40.47	40.83	38.57		32.19	28.34	4.13	0.26					810.26	40.45	40.65	40.76	40.11	40.07	40.07	40	40.37	39.98	40.22	40.24	40.35	41.13	0.00260989
H	35.87	28.55	43.65	41.53	41.58	40.97	42.48	38.08	42.59	41.23	43.43	42.29		35.87	28.55	7.94	0.12					810.27	38.76	38.51	38.97	39.06	39.44	39.37	39.65	39.63	39.96	39.7	40.06	39.77	39.69	0.0534615
Measurement count: 17 Ex: 485 Em: 527 Scaling Factor : 1/1																						810.28	38.49	38.57	38.87	40.13	39.3	40.46	40.95	40.91	41.28	41.26	41.55	41.21	41.38	0.13478
	1	2	3	4	5	6	7	8	9	10	11	12										810.29	37.53	37.62	37.59	37.5	37.79	37.92	38.04	38.08	38.5	38.29	38.31	38.26	38.67	0.0463462
A	27.93	28.77	41.36	39.84	43.69	42.58	45.14	42.49	43.17	40.69	42.68	41.15		27.93	28.77	0.45	-0.82					810.3	40.02	39.85	39.95	39.97	40.49	40.35	40.65	40.58	40.69	40.57	40.76	40.58	40.75	0.0376374
B	28.11	28.26	42.1	40.54	44.32	43.37	42.12	41.26	43.57	41.86	43.06	41.29		28.11	28.26	0.81	-0.46					810.5	41.82	41.88	41.75	41.69	41.93	41.77	41.88	41.67	41.86	41.78	41.75	41.69	41.91	-0.00104396
C	28.4	28.4	43.96	42.19	44.63	42.47	43.24	41.55	43.07	40.44	43.14	40.46		28.4	28.4	0.62	-0.33					810.6	40.53	40.12	40.3	40.25	40.51	40.28	40.4	40.14	40.44	40.22	40.5	40.25	40.48	0.00214286
D	28.69	28.25	41.95	39.59	42.3	40.97	41.97	39.85	42.94	41.78	43.18	42.47		28.69	28.25	1.07	0.02					810.7	42	41.97	41.95	41.68	41.74	41.73	41.8	41.57	41.78	41.56	41.79	41.48	41.52	-0.0176099
E	29.34	28.1	43.8	41.93	41.96	39.96	42.63	39.98	41.92	39.83	41.98	38.61		29.34	28.1	1.77	-0.05					810.8	39.05	38.92	39.1	39.17	39.52	39.43	39.83	39.71	39.83	39.73	40.02	39.8	39.67	0.0395055
F	30.44	27.31	44.46	41.95	42.74	39.89	42.42	39.96	42.91	40.27	42.33	40.72		30.44	27.31	2.53	-0.5					810.11	39.1	38.92	38.83	39.13	39.16	39.2	39.62	39.65	40.27	39.91	40.4	40.05	40.3	0.0663187
G	32.82	28.66	47.11	42.79	44.36	42.23	42.43	41.28	42.01	40.43	40.93	38.88		32.82	28.66	4.76	0.58					810.21	40.79	40.5	40.67	40.66	40.77	40.75	40.87	40.47	40.43	39.91	39.72	39.5	39.58	-0.0529396
H	36.82	28.91	43.88	41.58	42.31	41.29	42.94	38.5	42.9	41.5	43.61	42.43		36.82	28.91	8.89	0.48					810.22	40.33	40.34	41.01	40.95	41.23	41.15	41.48	41.23	41.5	41.35	41.53	41.34	41.42	0.0424176
Measurement count: 18 Ex: 485 Em: 527 Scaling Factor : 1/1																						810.23	40.39	39.8	40.19	40.88	41.09	41.02	40.45	41.01	41.15	41.18	41.21	41.13	41.29	0.0470879
	1	2	3	4	5	6	7	8	9	10	11	12										810.24	41.06	40.92	41.16	41.03	41.3	41.09	41.2	40.98	41.29	41.04	41.45	41.18	41.47	0.0132418
A	27.92	28.71	41.28	39.83	43.57	42.5	45.01	42.11	43.34	40.57	42.56	41.18		27.92	28.71	0.44	-0.88					810.25	39.11	39	39.29	39.54	39.87	39.82	40.25	40.02	40.46	40.32	40.4	40.36	40.54	0.0646703
B	28.04	28.26	42.14	40.3	44.08	43.13	41.74	40.79	43.48	41.78	42.92	41.04		28.04	28.26	0.74	-0.46					810.16	42.7	42.63	42.73	42.42	42.62	42.58	42.65	42.38	42.47	42.06	42.25	41.84	41.72	-0.0366209
C	28.28	28.38	43.88	42.06	43.6	41.54	42.37	40.73	42.9	40.22	43.03	40.32		28.28	28.38	0.5	-0.35					810.17	37.31	37.12	37.29	37.38	37.83	37.77	38.13	38.18	38.61	38.36	38.64	38.52	38.87	0.0732692
D	28.88	28.14	41.92	39.33	41.99	41.04	41.54	40.01	42.61	41.56	42.97	42.06		28.88	28.14	1.26	-0.09					810.18	41.28	41.01	41.13	40.86	40.81	40.71	40.86	40.69	40.72	40.42	40.25	39.91	39.87	-0.0521978
E	29.37	28.09	43.46	41.67	42.03	40.04	42.88	40.22	41.74	39.73	41.93	38.36		29.37	28.09	1.8	-0.06					810.19	38.41	38.12	38.08	37.9	38.26	38.36	38.59	38.57	38.88	38.65	38.86	38.73	39.13	0.0389835
F	30.66	27.16	44.23	41.56	42.81	39.83	42.15	39.7	43.02	39.91	42.28	40.42		30.66	27.16	2.75	-0.65					810.2	42.21	42.03	42.34	42.2	42.43	42.56	42.6	42.29	42.43	41.82	41.34	40.73	40.71	-0.0574451
G	33.2	28.6	45.67	42.02	44.03	42.09	42.19	41.26	41.64	39.91	40.71	38.65		33.2	28.6	5.14	0.52
H	37.57	29.04	43.44	41.31	42.57	41.22	42.74	38.29	42.97	41.35	43.01	41.82		37.57	29.04	9.64	0.61
Measurement count: 19 Ex: 485 Em: 527 Scaling Factor : 1/1
	1	2	3	4	5	6	7	8	9	10	11	12
A	28.11	28.82	41.57	40.02	43.87	42.62	45.52	42.56	43.56	40.76	42.68	41.21		28.11	28.82	0.63	-0.77
B	28.22	28.35	42.23	40.46	44.12	43.12	42.28	41.21	43.52	41.75	43.15	41.45		28.22	28.35	0.92	-0.37
C	28.51	28.54	43.72	42.02	44.43	42.32	43.38	41.48	43.02	40.5	43.14	40.4		28.51	28.54	0.73	-0.19
D	29.29	28.36	42.26	39.58	42.12	40.97	41.93	39.82	42.86	41.79	43.08	42.25		29.29	28.36	1.67	0.13
E	29.65	28.18	43.61	42	42.12	39.93	42.71	40.24	41.75	40.02	42.02	38.64		29.65	28.18	2.08	0.03
F	31.02	27.36	44.44	41.85	43	39.9	42.29	40.06	43.17	40.4	41.98	40.25		31.02	27.36	3.11	-0.45
G	33.78	28.78	45.98	42.51	44.22	42.17	42.62	41.55	41.69	39.72	41	38.86		33.78	28.78	5.72	0.7
H	38.46	29.37	43.49	41.14	42.78	41.46	43.58	38.31	43.15	41.53	43.04	41.34		38.46	29.37	10.53	0.94
Measurement count: 20 Ex: 485 Em: 527 Scaling Factor : 1/1
	1	2	3	4	5	6	7	8	9	10	11	12
A	28.08	28.77	41.79	39.92	43.77	42.4	45.01	42.29	43.46	40.58	42.52	41.13		28.08	28.77	0.6	-0.82
B	28.2	28.32	42.05	40.45	44.15	43.08	42.02	41.01	43.39	41.69	43.03	41.18		28.2	28.32	0.9	-0.4
C	28.48	28.46	43.61	41.83	43.64	41.49	42.45	40.8	43.12	40.25	42.89	40.36		28.48	28.46	0.7	-0.27
D	28.93	28.24	42.21	39.45	42.01	41.04	41.46	40.07	42.87	41.48	42.61	41.84		28.93	28.24	1.31	0.01
E	29.72	28.18	43.28	41.55	42.17	39.99	42.83	40.35	41.78	39.8	42.04	38.52		29.72	28.18	2.15	0.03
F	31.19	27.38	44.18	41.39	42.86	40.01	42.23	39.77	43.4	40.05	41.78	39.91		31.19	27.38	3.28	-0.43
G	34.22	28.75	45.09	42.04	43.55	41.64	42.81	41.21	41.58	39.5	41.03	38.73		34.22	28.75	6.16	0.67
H	38.97	29.31	42.99	40.86	42.51	41.23	43.67	38.26	43.07	41.34	42.33	40.73		38.97	29.31	11.04	0.88
Measurement count: 21 Ex: 485 Em: 527 Scaling Factor : 1/1
	1	2	3	4	5	6	7	8	9	10	11	12
A	28.2	28.87	41.98	40.17	43.81	42.67	45.45	42.71	43.65	40.75	42.66	41.29		28.2	28.87	0.72	-0.72
B	28.35	28.48	42.17	40.64	44.25	43.21	42.48	41.31	43.76	41.91	43.27	41.47		28.35	28.48	1.05	-0.24
C	28.67	28.63	43.44	41.81	44.15	41.74	42.93	41.36	43.24	40.48	43.15	40.54		28.67	28.63	0.89	-0.1
D	29.84	28.45	42.56	39.54	42.05	41.17	41.6	39.58	43.01	41.52	42.78	41.72		29.84	28.45	2.22	0.22
E	30.1	28.38	43.88	41.87	42.14	39.36	42.64	41.13	41.44	39.67	42.2	38.87		30.1	28.38	2.53	0.23
F	31.64	28.1	43.91	41.22	42.78	40.16	42.42	39.69	43.65	40.3	41.72	39.87		31.64	28.1	3.73	0.29
G	35.04	28.98	46.26	42.11	44.09	41.84	42.96	41.38	41.67	39.58	41.05	39.13		35.04	28.98	6.98	0.9
H	39.81	29.78	42.84	40.84	42.7	41.59	43.88	38.67	43.12	41.42	42.26	40.71		39.81	29.78	11.88	1.35
[truncated: 6 more columns]

## Sheet: 810 Serum NTBI
														Average -Def	Average +Def	Zeroed -Def	Zeroed +Def
Measurement count: 1 Ex: 485 Em: 527 Scaling Factor : 1/1																					C/C -Deferiprone																									810
	1	2	3	4	5	6	7	8	9	10	11	12									Time (min)	16	18	20	22	24	26	28	30	32	34	36	38	40	Slope Fxn	Fe (uM)	Slopes -Def	Slopes +Def	Difference	Mcalibr	Samples Slopes -Def	Samples Slopes +Def	LPI (uM)
A	18.28	20.03	27.56	27.41	29.94	28.38	28.81	28.34	28.08	27.03	29.36	27.74		18.28	20.03	0	0					-0.25	-0.17	-0.06	-0.03	0.1	0.11	0.21	0.31	0.41	0.46	0.6	0.56	0.67	0.0387363	0	0.0387363	0.0194231	0.0193132	0.0503851	0.0206319	0.00266484	0.356594	810.46	0.334566	WT ND LPS		0	1.53
B	18.02	21.08	28.45	28.15	29	27.73	29.9	29.33	28.86	27.71	28.54	27.01		18.02	21.08	0	0					0.21	0.26	0.41	0.52	0.55	0.62	0.83	0.82	1.01	0.99	1.21	1.25	1.35	0.0481319	0.078125	0.0481319	0.0283791	0.0197527		0.00903846	-0.0160989	0.498905	810.47				0.078125
C	18.07	18.46	28.83	28.35	28.42	27.69	29.82	27.72	28.87	28.04	29.39	28.46		18.07	18.46	0	0					0.44	0.24	0.38	0.38	0.97	0.54	0.69	0.74	0.92	0.92	1.12	1.17	1.34	0.040467	0.15625	0.040467	0.0321703			0.012033	0.00804945	0.0790614	810.48				0.15625
D	18.01	18.43	28.35	27.52	29.08	28.07	29.87	28.18	28.7	27.86	27.92	26.82		18.01	18.43	0	0					0.43	0.78	1	1.08	0.93	1.36	1.63	1.67	1.89	1.96	2.18	2.27	2.07	0.0738462	0.3125	0.0738462	0.0348077	0.0390385		0.0295879	-0.00549451	0.696286	810.49				0.3125	2.05
E	18.27	18.48	29.53	27.96	28.31	27.81	28.87	27.71	28.54	29.32	27.3	25.09		18.27	18.48	0	0					0.2	0.39	0.58	0.76	0.99	1.11	1.38	1.47	1.79	1.91	2.2	2.32	2.64	0.0993956	0.625	0.0993956	0.0412637	0.0581319		-0.00543956	-0.00755495	0.0419843	810.5				0.625	2.16
F	18.27	18.62	30.22	28.53	28.64	27.37	27.54	26.31	28.12	28.12	27.48	26.34		18.27	18.62	0	0					0.92	1.15	1.39	1.57	1.84	2.06	2.42	2.64	3.01	3.16	3.6	3.81	4.27	0.13717	1.25	0.13717	0.0478571	0.0893132		0.0198901	0.0118956	0.158668	810.43	0.308721	WT ND LPS + Hep		1.25	3.68
G	18.58	19.12	28.54	27.55	27.75	25.97	28.63	28.1	27.6	27.24	27.98	27.09		18.58	19.12	0	0					1.51	1.77	2.16	2.52	2.97	3.33	3.86	4.27	4.85	5.3	5.91	6.39	7.08	0.232308	2.5	0.232308	0.0563462			0.0310989	0.0101648	0.415481	810.44				2.5
H	19.24	18.31	28.8	27.36	28.26	27.19	28.68	27.4	28	28.76	27.92	26.93		19.24	18.31	0	0					2.71	3.22	3.8	4.49	5.28	5.95	6.78	7.53	8.42	9.09	9.85	10.31	11.04	0.360687	5	0.360687	0.088489	0.272198		-0.00848901	-0.0231593	0.291164	810.45				5	9.07
Measurement count: 2 Ex: 485 Em: 527 Scaling Factor : 1/1																																									0.0291484	-0.00502747	0.678292	810.53
	1	2	3	4	5	6	7	8	9	10	11	12																													0.0151923	0.0201923	0	810.54
A	18.09	19.58	27.23	26.91	29.58	27.97	28.35	27.54	27.37	26.56	28.46	26.68		18.09	19.58	-0.19	-0.45																								0.0670604	0.0113462	1.10577	810.36	0.375133	WT CID LPS
B	18.03	18.75	28.27	27.6	28.44	26.97	28.92	28.12	28.66	27.45	27.85	26.38		18.03	18.75	0.01	-2.33																								0.0131868	0.00282967	0.20556	810.37
C	18.01	18.24	28.5	27.78	28.15	27.08	28.95	27.71	28.71	27.75	29.03	28.04		18.01	18.24	-0.06	-0.22																								-0.0035989	-0.0119505	0.165756	810.38
D	17.98	18.29	28.18	27.02	28.4	27.57	29.18	28.04	28.47	27.19	27.99	26.48		17.98	18.29	-0.03	-0.14																								-0.0281319	-0.00222527	0	810.39
E	18.21	18.27	28.68	27.4	27.99	27.3	28.09	27.17	28.12	27.41	27.32	25.03		18.21	18.27	-0.06	-0.21																								-0.00667582	-0.0267582	0.398578	810.4
F	18.21	18.42	29.31	28.16	28.25	26.92	27.1	25.47	28.23	26.81	27.57	26.17		18.21	18.42	-0.06	-0.2																								0.00368132	-0.0102198	0.275897	810.14	0.231514	WT CID LPS + Hep
G	18.52	18.56	28.24	27.24	27.97	26.18	27.91	27.06	27.59	26.18	27.94	26.86		18.52	18.56	-0.06	-0.56																								0.0441758	0.0267582	0.345689	810.15
H	19.33	18.18	28.37	27.06	28.21	27.13	28.5	26.89	27.78	26.76	27.55	26.62		19.33	18.18	0.09	-0.13																								0.0218681	0.00461538	0.342418	810.32
Measurement count: 3 Ex: 485 Em: 527 Scaling Factor : 1/1																																									0.0192857	0.0248077	0	810.33
	1	2	3	4	5	6	7	8	9	10	11	12																													-0.00590659	-0.0156593	0.193564	810.34
A	17.5	18.6	26.52	26.14	28.92	28.31	27.47	26.5	26.84	25.77	28.25	26.09		17.5	18.6	-0.78	-1.43																								-0.00703297	-0.00815934	0	810.26	0.259758	KO ND LPS
B	17.44	17.72	27.25	26.54	28.6	27.19	27.95	26.96	27.98	26.22	27.67	26.2		17.44	17.72	-0.58	-3.36																								0.00931319	-0.0164011	0.510355	810.27
C	17.44	17.48	28.44	27.62	27.24	25.92	27.58	26.3	27.89	26.5	27.72	26.87		17.44	17.48	-0.63	-0.98																								-0.00370879	-0.00513736	0	810.28
D	17.41	17.27	28.47	27.34	27.44	26.4	28.13	26.86	27.85	27.08	28.25	26.67		17.41	17.27	-0.6	-1.16																								0.00324176	-0.00686813	0.200652	810.29
E	17.87	17.39	28.98	27.58	28.19	26.85	27.54	26.32	27.68	26.51	27.58	25.08		17.87	17.39	-0.4	-1.09																								0.0521703	0.0225549	0.587781	810.3
F	18.05	17.4	27.73	26.68	28.11	26.66	26.33	24.67	28.61	27.38	27.74	26.14		18.05	17.4	-0.22	-1.22																								0.0143956	0.0137088	0.0136313	810.5	0.0699012	KO ND LPS + Hep
G	18.52	17.59	27.27	26.05	28.22	26.35	27.11	26.15	27.67	26.92	28.1	26.73		18.52	17.59	-0.06	-1.53																								0.00821429	0.0081044	0.002181	810.6
H	19.21	17.38	27.33	25.9	28.08	26.78	28.38	25.47	27.04	25.85	27.6	26.09		19.21	17.38	-0.03	-0.93																								0.00436813	0.0122253	0	810.7
Measurement count: 4 Ex: 485 Em: 527 Scaling Factor : 1/1																																									0.0025	0.00266484	0	810.8
	1	2	3	4	5	6	7	8	9	10	11	12																													0.0209615	0.00414835	0.333694	810.11
A	17.64	18.49	27.09	26.59	29.48	27.93	27.71	26.74	26.98	25.98	28.46	26.32		17.64	18.49	-0.64	-1.54																								0.0165659	-0.00032967	0.335329	810.21	0.502612	KO IDD LPS
B	17.52	17.72	27.26	26.6	28.1	26.97	28.32	27.27	28.21	26.43	27.93	26.44		17.52	17.72	-0.5	-3.36																								0.0328571	0.00826923	0.488	810.22
C	17.6	17.53	28.79	27.94	27.14	25.83	27.68	26.42	28.19	26.69	27.92	27.01		17.6	17.53	-0.47	-0.93																								0.0375275	0.0123352	0.499995	810.23
D	17.58	17.28	28.34	27.17	27.52	26.65	28.19	27.08	28.18	27.31	28.08	26.71		17.58	17.28	-0.43	-1.15																								0.0175549	-0.0214835	0.774802	810.24
E	18.02	17.4	29.14	27.45	28.27	26.91	28.42	26.54	27.84	26.43	27.51	24.86		18.02	17.4	-0.25	-1.08																								0.0286813	0.00777473	0.414936	810.25
F	18.19	17.48	27.85	27.26	28.3	26.94	26.17	24.8	28.6	27.02	27.79	26.18		18.19	17.48	-0.08	-1.14																								0.0148626	0.0155769	0	810.16	0.179606	KO IDD LPS + Hep
G	18.75	17.54	27.14	25.93	28.13	27.31	27.09	26.14	27.73	26.36	27.99	26.84		18.75	17.54	0.17	-1.58																								-0.0168407	-0.00549451	0	810.17
H	19.54	17.42	27.17	25.95	28.5	28.1	27.66	25.55	27.15	25.83	27.82	26.43		19.54	17.42	0.3	-0.89																								0.0117308	0.00505495	0.132496	810.18
Measurement count: 5 Ex: 485 Em: 527 Scaling Factor : 1/1																																									-0.0116758	-0.00461538	0	810.19
	1	2	3	4	5	6	7	8	9	10	11	12																													0.0266758	-0.0118956	0.765532	810.2
A	17.66	18.56	26.88	26.34	29.2	28.2	27.51	26.32	27.02	25.79	28.54	26.09		17.66	18.56	-0.62	-1.47
B	17.65	17.77	27.11	26.4	28.46	27	27.99	26.8	27.82	26.45	28.06	26.36		17.65	17.77	-0.37	-3.31
C	17.74	17.57	28.82	28.05	26.86	25.64	27.28	26.13	27.78	26.57	27.47	26.46		17.74	17.57	-0.33	-0.89																											*Used controls from previous experiments
D	17.83	17.25	28.52	27.23	27.35	26.33	28.02	26.7	28.04	27.07	28.3	26.95		17.83	17.25	-0.18	-1.18
E	17.96	17.52	29.26	27.8	28.33	26.76	28.34	26.46	27.78	25.94	27.69	25.03		17.96	17.52	-0.31	-0.96				C/C +Deferiprone
F	18.42	17.6	27.74	27.01	28.38	26.85	26.26	24.61	28.68	27.16	27.9	26.2		18.42	17.6	0.15	-1.02				Time (min)	16	18	20	22	24	26	28	30	32	34	36	38	40	Slope Fxn	Fe (uM)
G	18.98	17.69	27.34	26.11	28.29	27.44	27.09	25.74	27.91	26.51	28.09	26.84		18.98	17.69	0.4	-1.43					-1.36	-1.36	-1.18	-1.2	-1.13	-1.22	-1.07	-1.11	-1.01	-1	-0.9	-0.96	-0.86	0.0194231	0
H	19.96	17.63	27.13	25.69	28.78	28.03	27.75	25.25	27.27	25.87	27.9	26.29		19.96	17.63	0.72	-0.68					-3.07	-3	-2.8	-2.86	-2.74	-2.68	-2.61	-2.61	-2.49	-2.57	-2.4	-2.43	-2.33	0.0283791	0.078125
Measurement count: 6 Ex: 485 Em: 527 Scaling Factor : 1/1																						-0.37	-0.42	-0.23	-0.23	-0.07	-0.1	0.05	0.02	0.2	0.18	0.32	0.24	0.35	0.0321703	0.15625
	1	2	3	4	5	6	7	8	9	10	11	12										-0.8	-0.71	-0.63	-0.61	-0.5	-0.51	-0.28	-0.3	-0.11	-0.24	-0.08	-0.02	0.02	0.0348077	0.3125
A	17.75	18.54	27.16	26.8	29.31	28.31	27.87	26.72	27.35	26.2	28.54	26.55		17.75	18.54	-0.53	-1.49					-0.51	-0.44	-0.32	-0.27	-0.11	-0.08	0.05	0.02	0.22	0.22	0.38	0.37	0.48	0.0412637	0.625
B	17.77	17.84	27.17	26.73	28.29	27.05	28.53	27.22	28.2	26.75	28.01	26.29		17.77	17.84	-0.25	-3.24					-0.59	-0.48	-0.39	-0.33	-0.1	-0.08	0.03	0.09	0.18	0.25	0.44	0.43	0.59	0.0478571	1.25
C	17.85	17.69	28.71	27.78	26.84	25.54	28.31	25.96	28.2	26.35	27.46	26.52		17.85	17.69	-0.22	-0.77					-0.86	-0.88	-0.72	-0.6	-0.49	-0.41	-0.16	-0.16	0.01	0.07	0.25	0.21	0.46	0.0563462	2.5
D	17.98	17.32	28.61	27.9	27.71	26.58	28.25	26.98	28.39	26.79	28.31	26.94		17.98	17.32	-0.03	-1.11					-0.1	0.05	0.1	0.22	0.52	0.76	0.89	0.89	1.28	1.6	1.65	1.61	1.97	0.088489	5
E	18.11	17.58	29.35	27.6	28.04	27.01	28.22	26.73	28.09	26.36	27.64	25.05		18.11	17.58	-0.16	-0.9
F	18.78	17.68	27.71	26.31	28.69	27.27	26.92	24.77	28.71	27.21	27.96	26.18		18.78	17.68	0.51	-0.94
G	19.24	17.8	27.97	25.72	28.27	26.48	27.74	25.91	27.79	26.53	28.2	26.93		19.24	17.8	0.66	-1.32
H	20.36	17.77	27.31	25.9	28.85	27.37	28.17	25.51	27.68	26.13	27.93	26.81		20.36	17.77	1.12	-0.54
Measurement count: 7 Ex: 485 Em: 527 Scaling Factor : 1/1
	1	2	3	4	5	6	7	8	9	10	11	12
A	17.82	18.54	27.04	26.48	29.26	28.47	27.98	26.62	27.44	26.27	28.7	26.53		17.82	18.54	-0.46	-1.49
B	17.94	17.92	27.53	27	28.5	27.25	28.76	27.34	28.14	26.84	28.14	26.47		17.94	17.92	-0.08	-3.16
C	18.07	17.81	28.81	27.67	26.86	25.52	27.46	26.15	28.25	26.59	27.41	26.26		18.07	17.81	0	-0.65
D	18.13	17.48	28.73	27.13	27.99	26.73	28.99	27.03	28.45	27.03	28.46	27.05		18.13	17.48	0.12	-0.95
E	18.12	17.79	29.55	27.74	28.18	27.05	28.57	26.87	28.2	26.5	27.83	25.12		18.12	17.79	-0.15	-0.69
F	18.71	17.91	28.03	27.28	28.76	27.43	27.1	25.25	28.95	27.35	28.1	26.38		18.71	17.91	0.44	-0.71
G	19.41	18.02	27.25	26.05	28.31	27.39	28.19	26.28	27.99	26.57	28.33	27.01		19.41	18.02	0.83	-1.1
H	20.87	17.95	27.94	26.64	29.02	28.86	28.95	26.23	27.96	26.6	28.11	26.94		20.87	17.95	1.63	-0.36
Measurement count: 8 Ex: 485 Em: 527 Scaling Factor : 1/1
	1	2	3	4	5	6	7	8	9	10	11	12
A	17.92	18.64	27.27	26.57	29.28	28.49	28.06	26.96	27.53	26.65	28.67	26.87		17.92	18.64	-0.36	-1.39
B	18.09	17.98	27.89	27.3	28.63	27.33	28.87	27.52	28.46	27.19	28.11	26.45		18.09	17.98	0.07	-3.1
C	18.14	17.91	28.92	27.65	26.79	25.51	28.59	26.2	28.55	26.69	27.58	26.36		18.14	17.91	0.07	-0.55
D	18.27	17.53	28.57	28.01	28.15	26.68	28.58	27.12	28.48	27.14	28.48	26.99		18.27	17.53	0.26	-0.9
E	18.38	17.83	29.71	27.9	28.02	27.05	28.46	26.96	28.32	26.82	27.82	25.13		18.38	17.83	0.11	-0.65
F	19.03	17.97	28.38	26.49	28.9	27.39	27.33	25.34	28.91	27.31	28.12	26.3		19.03	17.97	0.76	-0.65
G	19.77	18.06	28.18	25.91	28.32	26.55	28.37	26.53	27.95	26.57	28.37	27.09		19.77	18.06	1.19	-1.06
H	21.36	18.1	28.26	26.95	29.06	27.56	29.33	26.39	28.21	26.8	28.16	26.93		21.36	18.1	2.12	-0.21
Measurement count: 9 Ex: 485 Em: 527 Scaling Factor : 1/1
	1	2	3	4	5	6	7	8	9	10	11	12
A	18.03	18.67	27.42	26.69	29.24	28.52	28.19	27.06	27.71	27.12	28.85	26.87		18.03	18.67	-0.25	-1.36
B	18.23	18.01	28.28	27.41	28.82	27.5	28.91	27.72	28.64	26.99	28.21	26.53		18.23	18.01	0.21	-3.07
C	18.51	18.09	28.98	27.74	26.92	25.39	28.14	26.32	28.78	26.96	27.77	26.89		18.51	18.09	0.44	-0.37
D	18.44	17.63	28.64	27.3	28.21	26.92	28.74	27.22	28.43	27.29	28.58	27.37		18.44	17.63	0.43	-0.8
E	18.47	17.97	29.6	27.95	28.29	27.12	28.68	27.08	28.93	27.03	27.93	25.24		18.47	17.97	0.2	-0.51
F	19.19	18.03	28.87	26.9	29.09	27.21	27.49	26.03	29.37	27.46	28.27	26.37		19.19	18.03	0.92	-0.59
G	20.09	18.26	27.7	26.27	29.12	26.52	28.59	26.9	28.14	26.68	28.55	27.17		20.09	18.26	1.51	-0.86
H	21.95	18.21	28.66	27.37	29.07	27.75	29.4	26.71	28.37	27.09	28.33	27.02		21.95	18.21	2.71	-0.1
Measurement count: 10 Ex: 485 Em: 527 Scaling Factor : 1/1
	1	2	3	4	5	6	7	8	9	10	11	12										Samples - Deferiprone
A	18.11	18.67	27.51	26.73	29.28	28.56	27.99	26.98	27.72	26.96	28.76	26.8		18.11	18.67	-0.17	-1.36					Time (min) ->	16	18	20	22	24	26	28	30	32	34	36	38	40	Slope Fxn
B	18.28	18.08	28.29	27.36	28.94	27.5	29.28	27.71	28.68	27.06	28.19	26.42		18.28	18.08	0.26	-3					810.46	27.42	27.51	27.73	27.95	27.96	28.15	28.18	28.01	28.08	28.05	28.15	27.9	28	0.0206319
C	18.31	18.04	28.9	28.69	26.94	25.42	28.34	26.62	28.68	27.05	28.12	26.76		18.31	18.04	0.24	-0.42					810.47	28.28	28.29	28.35	28.33	28.37	28.48	28.49	28.53	28.59	28.65	28.64	28.45	28.26	0.00903846
D	18.79	17.72	28.62	27.24	28.44	26.88	28.48	27.27	28.56	27.22	28.57	27.86		18.79	17.72	0.78	-0.71					810.48	28.98	28.9	28.86	28.9	28.96	28.95	29.05	28.88	29.16	28.93	29.26	29	29.29	0.012033
E	18.66	18.04	29.63	27.94	28.17	26.73	28.49	27.09	29.02	27.1	27.94	25.14		18.66	18.04	0.39	-0.44					810.49	28.64	28.62	28.83	28.61	29.17	28.69	29.22	28.86	29.4	28.9	29.45	28.97	29.48	0.0295879
F	19.42	18.14	29.27	26.86	29	27.13	27.53	26.34	29.38	27.44	28.53	26.4		19.42	18.14	1.15	-0.48					810.5	29.6	29.63	29.65	29.91	29.78	29.79	29.68	29.42	29.91	29.34	29.77	29.31	29.76	-0.00543956
G	20.35	18.24	27.97	26.49	28.58	26.25	28.67	27.22	28.08	26.61	28.54	27.15		20.35	18.24	1.77	-0.88					810.43	28.87	29.27	29.56	29.64	29.71	29.8	29.79	29.78	29.92	29.9	29.93	29.55	29.4	0.0198901
H	22.46	18.36	28.87	27.45	29.06	27.58	29.56	26.88	28.36	27.21	28.33	26.95		22.46	18.36	3.22	0.05					810.44	27.7	27.97	28.29	28.54	28.69	28.64	28.62	28.59	28.71	28.58	28.68	28.4	28.95	0.0310989
Measurement count: 11 Ex: 485 Em: 527 Scaling Factor : 1/1																						810.45	28.66	28.87	29.3	29.26	29.67	29.37	29.64	29.49	29.61	28.97	28.89	28.73	28.68	-0.00848901
	1	2	3	4	5	6	7	8	9	10	11	12										810.53	29.24	29.28	29.26	29.39	29.61	29.39	29.68	29.5	29.91	29.47	30.05	29.56	30.09	0.0291484
A	18.22	18.85	27.73	26.81	29.26	28.41	28.24	27.21	28.03	27.23	28.99	26.93		18.22	18.85	-0.06	-1.18					810.54	28.82	28.94	28.93	29	29.1	28.98	29.17	29.04	29.23	29.12	29.37	29.09	29.21	0.0151923
B	18.43	18.28	28.35	27.33	28.93	27.66	29.42	27.6	28.86	27.21	28.35	26.56		18.43	18.28	0.41	-2.8					810.36	26.92	26.94	26.98	27.01	27.12	27.23	27.35	27.39	27.62	27.81	28.13	28.21	28.57	0.0670604
C	18.45	18.23	28.86	28.6	26.98	25.54	28.56	26.82	28.78	27.27	28.33	26.82		18.45	18.23	0.38	-0.23					810.37	28.21	28.44	28.5	28.47	28.48	28.46	28.55	28.52	28.62	28.57	28.67	28.62	28.64	0.0131868
D	19.01	17.8	28.83	27.66	28.5	26.93	28.65	27.37	28.6	27.33	28.75	28.15		19.01	17.8	1	-0.63					810.38	28.29	28.17	28.48	28.26	28.26	28.04	28.17	28.11	28.23	28.12	28.33	28.17	28.24	-0.0035989
E	18.85	18.16	29.65	27.92	28.48	26.94	28.78	27.27	29.18	27.29	27.97	25.19		18.85	18.16	0.58	-0.32					810.39	29.09	29	29.28	28.96	29.37	29.05	28.96	28.56	28.76	28.61	28.69	28.48	28.67	-0.0281319
F	19.66	18.23	29.56	27.46	29.28	27.15	27.77	26.2	29.46	27.62	28.69	26.4		19.66	18.23	1.39	-0.39					810.4	29.12	28.58	28.5	28.24	29.09	28.7	28.72	28.66	29.44	28.72	28.9	28.71	27.99	-0.00667582
G	20.74	18.4	28.29	26.93	28.5	26.26	28.76	27.49	28.35	26.82	28.65	27.17		20.74	18.4	2.16	-0.72					810.14	29.07	29.06	29.25	29.09	29.32	29.08	29.28	29.31	29.47	29.23	29.4	29.09	29.01	0.00368132
H	23.04	18.41	29.3	27.61	29.25	27.75	29.7	27.04	28.54	27.4	28.45	27.11		23.04	18.41	3.8	0.1					810.15	28.19	27.99	28.24	28.19	28.53	28.24	28.79	28.36	28.96	28.63	29.18	28.65	29.31	0.0441758
Measurement count: 12 Ex: 485 Em: 527 Scaling Factor : 1/1																						810.32	28.91	29.28	29.42	29.28	29.04	29.33	29.68	29.26	29.43	29.42	29.77	29.49	29.64	0.0218681
	1	2	3	4	5	6	7	8	9	10	11	12										810.33	28.14	28.34	28.56	28.53	28.76	28.72	28.82	28.71	28.8	28.67	28.78	28.69	28.79	0.0192857
A	18.25	18.83	27.95	26.93	29.39	28.45	28.19	27	28	27.18	28.83	26.85		18.25	18.83	-0.03	-1.2					810.34	28.74	28.48	28.65	28.57	28.93	28.59	28.7	28.56	28.55	28.35	28.57	28.5	28.66	-0.00590659
B	18.54	18.22	28.33	27.3	29	27.7	29.28	27.66	28.74	27.19	28.48	26.37		18.54	18.22	0.52	-2.86					810.26	28.68	28.49	28.78	28.59	28.79	28.59	28.67	28.49	28.57	28.44	28.67	28.48	28.5	-0.00703297
C	18.45	18.23	28.9	28.61	27.01	25.71	28.53	26.88	28.7	27.25	28.39	26.99		18.45	18.23	0.38	-0.23					810.27	27.49	27.53	27.77	27.58	27.59	27.56	27.65	27.52	27.72	27.63	27.8	27.69	27.84	0.00931319
D	19.09	17.82	28.61	27.26	28.47	27.02	28.57	27.24	28.52	27.25	28.69	28.18		19.09	17.82	1.08	-0.61					810.28	28.59	28.67	28.76	28.74	28.85	28.83	29.06	29	29	28.69	28.71	28.46	28.52	-0.00370879
E	19.03	18.21	29.91	27.91	28.26	26.72	28.59	27.01	28.99	27.1	27.95	25.17		19.03	18.21	0.76	-0.27					810.29	29.4	29.56	29.7	29.68	29.81	29.66	29.78	29.62	29.81	29.63	29.71	29.55	29.63	0.00324176
F	19.84	18.29	29.64	27.6	28.96	27.06	27.58	26.16	29.47	27.63	28.62	26.36		19.84	18.29	1.57	-0.33					810.3	27.71	27.72	28.03	28	28.28	28.05	28.52	28.22	28.71	28.43	28.93	28.75	29.03	0.0521703
G	21.1	18.52	28.54	26.98	28.24	26.02	28.74	27.44	28.28	26.71	28.58	27.08		21.1	18.52	2.52	-0.6					810.5	28.64	28.68	28.86	28.74	28.79	28.76	29.01	28.76	29.03	28.83	29.18	28.83	29.05	0.0143956
H	23.73	18.53	29.26	27.5	29.09	27.58	29.68	26.97	28.52	27.37	28.38	27.16		23.73	18.53	4.49	0.22					810.6	28.78	28.68	28.78	28.7	28.83	28.78	28.93	28.79	29.06	28.72	29.11	28.74	28.92	0.00821429
Measurement count: 13 Ex: 485 Em: 527 Scaling Factor : 1/1																						810.7	28.43	28.56	28.6	28.52	28.68	28.55	28.81	28.58	28.85	28.56	28.71	28.38	28.69	0.00436813
	1	2	3	4	5	6	7	8	9	10	11	12										810.8	28.93	29.02	29.18	28.99	29.39	29.15	29.61	29.15	29.31	29.29	29.39	29.15	28.71	0.0025
A	18.38	18.9	27.96	26.92	29.61	28.45	28.53	27.34	28.28	27.41	29.26	27.07		18.38	18.9	0.1	-1.13					810.11	29.37	29.38	29.46	29.47	29.57	29.5	29.87	29.51	30.04	29.89	30.06	29.6	29.69	0.0209615
B	18.57	18.34	28.37	27.36	29.1	27.8	29.04	27.55	28.79	27.39	28.75	26.53		18.57	18.34	0.55	-2.74					810.21	28.14	28.08	28.35	28.28	28.53	28.3	28.67	28.46	28.75	28.39	28.5	28.44	28.59	0.0165659
C	19.04	18.39	28.96	27.85	27.12	25.71	28.76	27.09	28.83	27.42	28.45	27.42		19.04	18.39	0.97	-0.07					810.22	28.37	28.36	28.54	28.52	28.71	28.67	28.96	28.85	29.2	28.97	29.13	28.89	29.11	0.0328571
D	18.94	17.93	29.17	27.74	28.48	27.1	28.93	27.33	28.68	27.43	28.95	27.7		18.94	17.93	0.93	-0.5					810.23	28.85	28.76	28.99	28.83	29.26	28.99	29.46	29.09	29.67	29.23	29.7	29.3	29.85	0.0375275
E	19.26	18.37	29.78	28.07	28.26	26.97	28.79	27.17	29.39	27.28	28.11	25.29		19.26	18.37	0.99	-0.11					810.24	28.21	28.19	28.35	28.48	28.75	28.57	28.75	28.64	28.81	28.61	28.72	28.54	28.64	0.0175549
F	20.11	18.52	29.71	27.8	29.37	27.41	27.59	25.57	29.57	27.72	28.75	26.51		20.11	18.52	1.84	-0.1					810.25	27.77	28.12	28.33	28.39	28.45	28.8	28.52	28.68	28.52	28.78	28.62	28.73	28.61	0.0286813
G	21.55	18.63	28.69	27.21	29.09	25.98	28.85	27.5	28.53	27.02	28.74	27.24		21.55	18.63	2.97	-0.49					810.16	28.58	28.57	28.75	28.69	28.95	28.87	28.99	28.83	29.15	28.8	29.29	28.65	28.94	0.0148626
H	24.52	18.83	29.67	27.68	29.32	27.71	29.81	27.08	28.71	27.39	28.59	27.28		24.52	18.83	5.28	0.52					810.17	27.93	27.94	27.97	27.95	28.11	27.85	27.88	27.7	27.78	27.66	27.66	27.61	27.67	-0.0168407
Measurement count: 14 Ex: 485 Em: 527 Scaling Factor : 1/1																						810.18	28.27	28.53	28.69	28.62	28.75	28.73	28.82	28.74	28.75	28.72	28.8	28.67	28.74	0.0117308
	1	2	3	4	5	6	7	8	9	10	11	12										810.19	28.55	28.54	28.65	28.58	28.74	28.62	28.66	28.42	28.61	28.34	28.52	28.21	28.4	-0.0116758
A	18.39	18.81	28.15	26.8	29.39	28.31	28.24	27.12	28.05	27.17	28.99	26.95		18.39	18.81	0.11	-1.22					810.2	28.33	28.33	28.45	28.38	28.59	28.56	28.76	28.83	28.88	28.89	29.08	28.86	28.69	0.0266758
B	18.64	18.4	28.48	27.23	28.98	27.7	29.33	27.56	28.76	27.16	28.57	26.29		18.64	18.4	0.62	-2.68
C	18.61	18.36	28.95	28.45	27.23	25.68	28.72	27.05	28.78	27.17	28.8	27.25		18.61	18.36	0.54	-0.1
D	19.37	17.92	28.69	27.41	28.46	27.07	28.59	27.14	28.55	27.3	28.87	28.05		19.37	17.92	1.36	-0.51
E	19.38	18.4	29.79	27.7	28.04	26.7	28.59	27.06	29.15	27.19	27.85	25.22		19.38	18.4	1.11	-0.08					Samples + Deferiprone
F	20.33	18.54	29.8	27.56	29.05	26.8	27.56	26.26	29.5	27.66	28.73	26.45		20.33	18.54	2.06	-0.08					Time (min) ->	16	18	20	22	24	26	28	30	32	34	36	38	40	Slope Fxn
G	21.91	18.71	28.64	27.04	28.7	25.87	28.83	27.51	28.3	26.87	28.62	27.16		21.91	18.71	3.33	-0.41					810.46	26.69	26.73	26.81	26.93	26.92	26.8	27.09	26.84	27.11	26.86	27	26.67	26.74	0.00266484
H	25.19	19.07	29.37	27.57	29.08	27.52	29.66	27	28.67	27.33	28.56	27.16		25.19	19.07	5.95	0.76					810.47	27.41	27.36	27.33	27.3	27.36	27.23	27.41	27.25	27.24	27.05	27.02	26.93	27.16	-0.0160989
Measurement count: 15 Ex: 485 Em: 527 Scaling Factor : 1/1																						810.48	27.74	28.69	28.6	28.61	27.85	28.45	28.58	28.38	28.6	28.37	28.59	28.23	28.5	0.00804945
	1	2	3	4	5	6	7	8	9	10	11	12										810.49	27.3	27.24	27.66	27.26	27.74	27.41	27.74	27.38	27.58	27.06	27.24	27.21	27.43	-0.00549451
A	18.49	18.96	28.18	27.09	29.68	28.39	28.79	27.47	28.52	27.45	29.46	27.31		18.49	18.96	0.21	-1.07					810.5	27.95	27.94	27.92	27.91	28.07	27.7	28.3	27.76	28.23	27.82	28.06	27.58	27.68	-0.00755495
B	18.85	18.47	28.49	27.41	29.17	27.8	29.68	27.77	29.01	27.36	28.75	26.53		18.85	18.47	0.83	-2.61					810.43	26.9	26.86	27.46	27.6	27.8	27.56	27.84	27.6	27.65	27.33	27.41	27.32	27.45	0.0118956
C	18.76	18.51	29.05	28.58	27.35	25.55	28.82	27.12	28.93	27.3	28.52	27.22		18.76	18.51	0.69	0.05					810.44	26.27	26.49	26.93	26.98	27.21	27.04	27.2	26.91	26.93	26.89	26.94	26.85	26.74	0.0101648
D	19.64	18.15	29.22	27.74	28.55	27.06	28.7	27.28	28.81	27.54	28.99	28.23		19.64	18.15	1.63	-0.28					810.45	27.37	27.45	27.61	27.5	27.68	27.57	27.66	27.47	27.23	26.97	27.13	26.99	27.1	-0.0231593
E	19.65	18.53	29.68	28.3	28.17	26.88	28.67	27.14	29.61	27.23	27.88	25.37		19.65	18.53	1.38	0.05					810.53	28.52	28.56	28.41	28.45	28.45	28.31	28.39	28.25	28.41	28.31	28.48	28.19	28.57	-0.00502747
F	20.69	18.65	29.79	27.84	28.96	27.35	27.65	26.04	29.87	27.67	28.82	26.5		20.69	18.65	2.42	0.03					810.54	27.5	27.5	27.66	27.7	27.8	27.7	27.8	27.73	27.98	27.76	27.96	27.86	28.13	0.0201923
G	22.44	18.96	28.62	27.2	28.72	25.97	29.06	27.67	28.67	27.01	28.66	27.26		22.44	18.96	3.86	-0.16					810.36	25.39	25.42	25.54	25.71	25.71	25.68	25.55	25.42	25.67	25.61	25.6	25.69	25.92	0.0113462
H	26.02	19.2	29.64	27.66	29.28	27.69	29.78	27.09	28.96	27.46	28.76	27.21		26.02	19.2	6.78	0.89					810.37	26.92	26.88	26.93	27.02	27.1	27.07	27.06	26.9	26.99	26.92	27.07	26.92	27.08	0.00282967
Measurement count: 16 Ex: 485 Em: 527 Scaling Factor : 1/1																						810.38	27.12	26.73	26.94	26.72	26.97	26.7	26.88	26.6	26.87	26.64	26.68	26.56	26.8	-0.0119505
	1	2	3	4	5	6	7	8	9	10	11	12										810.39	27.21	27.13	27.15	27.06	27.41	26.8	27.35	27.18	27.34	27.09	27.17	27.03	27.09	-0.00222527
A	18.59	18.92	28.01	26.84	29.5	28.25	28.36	27.19	28.22	27.35	29.09	26.93		18.59	18.92	0.31	-1.11					810.4	26.52	26.25	26.26	26.02	25.98	25.87	25.97	25.76	25.85	25.75	25.88	25.67	25.83	-0.0267582
B	18.84	18.47	28.53	27.25	29.04	27.73	29.26	27.5	28.76	27.19	28.64	26.22		18.84	18.47	0.82	-2.61					810.14	27.75	27.58	27.75	27.58	27.71	27.52	27.69	27.4	27.53	27.44	27.51	27.46	27.54	-0.0102198
C	18.81	18.48	28.88	28.38	27.39	25.42	28.71	27.05	28.79	27.1	28.68	27.16		18.81	18.48	0.74	0.02					810.15	27.06	26.98	27.21	27	27.34	27.12	27.47	27.19	27.6	27.33	27.65	27.42	27.76	0.0267582
D	19.68	18.13	28.86	27.38	28.52	26.9	28.56	27.1	28.58	27.35	28.83	27.93		19.68	18.13	1.67	-0.3					810.32	27.72	27.71	27.6	27.66	27.55	27.56	27.77	27.5	27.74	27.7	27.93	27.67	27.74	0.00461538
E	19.74	18.5	29.42	27.76	28.11	26.6	28.49	26.99	29.15	27.18	27.7	25.21		19.74	18.5	1.47	0.02					810.33	26.32	26.62	26.82	26.88	27.09	27.05	27.12	27.05	27.19	27.15	27.16	27.1	27.03	0.0248077
F	20.91	18.71	29.78	27.6	28.56	27.18	27.52	25.3	29.51	27.57	28.74	26.41		20.91	18.71	2.64	0.09					810.34	27.22	27.27	27.37	27.24	27.33	27.14	27.28	27.1	27.19	26.98	27.11	26.87	26.96	-0.0156593
G	22.85	18.96	28.59	26.91	28.66	25.76	29	27.43	28.46	26.84	28.42	27.16		22.85	18.96	4.27	-0.16					810.26	27.08	27.09	27.27	27.01	27.17	27.06	27.14	26.99	27.1	26.96	26.95	26.92	27	-0.00815934
H	26.77	19.2	29.49	27.47	29.31	27.4	29.62	26.91	28.85	27.34	28.83	26.97		26.77	19.2	7.53	0.89					810.27	26.03	26.34	26.2	26.16	25.57	26.26	26.04	25.3	26.29	26.2	26.16	26.03	25.22	-0.0164011
Measurement count: 17 Ex: 485 Em: 527 Scaling Factor : 1/1																						810.28	26.9	27.22	27.49	27.44	27.5	27.51	27.67	27.43	27.32	27.06	27.37	26.97	27.14	-0.00513736
	1	2	3	4	5	6	7	8	9	10	11	12										810.29	26.71	26.88	27.04	26.97	27.08	27	27.09	26.91	26.99	26.76	26.85	26.7	26.72	-0.00686813
A	18.69	19.02	28.08	27.11	29.91	28.41	28.96	27.6	28.71	27.53	29.67	27.36		18.69	19.02	0.41	-1.01					810.3	27.12	26.96	27.23	27.18	27.41	27.17	27.45	27.35	27.53	27.38	27.68	27.45	27.61	0.0225549
B	19.03	18.59	28.59	27.24	29.23	27.98	29.43	27.74	29.03	27.46	28.81	26.29		19.03	18.59	1.01	-2.49					810.5	26.99	27.06	27.21	27.19	27.39	27.16	27.36	27.19	27.46	27.24	27.47	27.21	27.47	0.0137088
C	18.99	18.66	29.16	28.6	27.62	25.67	28.8	27.19	29.06	27.37	28.52	27.22		18.99	18.66	0.92	0.2					810.6	26.96	27.05	27.27	27.25	27.42	27.17	27.3	27.1	27.37	27.14	27.38	27.16	27.37	0.0081044
D	19.9	18.32	29.4	27.58	28.62	26.99	28.55	27.19	28.85	27.46	29.15	28.4		19.9	18.32	1.89	-0.11					810.7	27.29	27.22	27.33	27.25	27.43	27.3	27.54	27.35	27.46	27.42	27.57	27.47	27.56	0.0122253
E	20.06	18.7	29.91	28.23	28.23	26.87	28.57	27.1	29.31	27.31	27.78	25.32		20.06	18.7	1.79	0.22					810.8	27.03	27.1	27.29	27.1	27.28	27.19	27.23	27.18	27.31	27.18	27.31	27.04	27.18	0.00266484
F	21.28	18.8	29.92	27.65	28.76	27.34	27.72	26.29	30.04	27.64	28.75	26.6		21.28	18.8	3.01	0.18					810.11	27.46	27.44	27.62	27.63	27.72	27.66	27.67	27.57	27.64	27.53	27.7	27.56	27.65	0.00414835
G	23.43	19.13	28.71	26.93	29.44	25.85	29	27.32	28.75	26.96	28.61	27.31		23.43	19.13	4.85	0.01					810.21	26.68	26.61	26.82	26.71	27.02	26.87	27.01	26.84	26.96	26.64	27.03	26.49	26.68	-0.00032967
H	27.66	19.59	29.61	27.23	29.47	27.53	29.81	26.99	29.2	27.57	28.88	27.19		27.66	19.59	8.42	1.28					810.22	27.09	27.21	27.4	27.37	27.39	27.33	27.46	27.34	27.57	27.49	27.5	27.25	27.37	0.00826923
Measurement count: 18 Ex: 485 Em: 527 Scaling Factor : 1/1																						810.23	26.87	26.8	26.93	26.85	27.07	26.95	27.31	26.93	27.36	26.91	27.32	26.95	27.11	0.0123352
	1	2	3	4	5	6	7	8	9	10	11	12										810.24	26.53	26.42	26.56	26.37	26.53	26.29	26.53	26.22	26.29	26.14	26.17	25.98	26.06	-0.0214835
A	18.74	19.03	28.05	26.86	29.47	28.31	28.63	27.33	28.43	27.38	29.23	26.91		18.74	19.03	0.46	-1					810.25	26.89	26.76	26.82	26.99	27.42	27.25	27.22	27.16	27.22	27.07	27.09	26.92	27.09	0.00777473
B	19.01	18.51	28.65	27.05	29.12	27.76	29.42	27.7	28.83	27.24	28.61	26.14		19.01	18.51	0.99	-2.57					810.16	27.37	27.86	28.15	28.18	27.7	28.05	28.23	27.93	28.4	28.08	28.33	27.85	28.04	0.0155769
C	18.99	18.64	28.93	28.37	27.81	25.61	28.67	27.15	28.72	27.14	28.78	27.07		18.99	18.64	0.92	0.18					810.17	25.24	25.14	25.19	25.17	25.29	25.22	25.37	25.21	25.32	25.03	25.08	24.89	25.25	-0.00549451
D	19.97	18.19	28.9	27.06	28.57	26.92	28.35	26.98	28.56	27.42	28.8	28.08		19.97	18.19	1.96	-0.24					810.18	26.37	26.4	26.4	26.36	26.51	26.45	26.5	26.41	26.6	26.38	26.53	26.42	26.54	0.00505495
E	20.18	18.7	29.34	27.82	28.12	26.64	28.44	26.96	29.29	27.18	27.66	25.03		20.18	18.7	1.91	0.22					810.19	27.17	27.15	27.17	27.08	27.24	27.16	27.26	27.16	27.31	27.06	27.25	27.01	26.94	-0.00461538
F	21.43	18.87	29.9	27.33	28.61	27.09	27.63	26.2	29.89	27.53	28.72	26.38		21.43	18.87	3.16	0.25					810.2	27.02	26.95	27.11	27.16	27.28	27.16	27.21	26.97	27.19	26.9	26.96	26.71	26.79	-0.0118956
G	23.88	19.19	28.58	26.89	28.72	25.75	28.69	27.06	28.39	26.64	28.34	27.06		23.88	19.19	5.3	0.07
H	28.33	19.91	28.97	26.97	29.23	27.44	29.63	26.76	28.97	27.49	28.89	26.9		28.33	19.91	9.09	1.6
Measurement count: 19 Ex: 485 Em: 527 Scaling Factor : 1/1
	1	2	3	4	5	6	7	8	9	10	11	12
A	18.88	19.13	28.15	27	30.05	28.48	29.18	27.65	28.93	27.68	29.7	27.32		18.88	19.13	0.6	-0.9
B	19.23	18.68	28.64	27.02	29.37	27.96	29.77	27.93	29.18	27.47	28.72	26.17		19.23	18.68	1.21	-2.4
C	19.19	18.78	29.26	28.59	28.13	25.6	28.78	27.16	29.11	27.38	28.62	27.09		19.19	18.78	1.12	0.32
D	20.19	18.35	29.45	27.24	28.67	27.07	28.57	27.11	28.71	27.57	29.29	28.33		20.19	18.35	2.18	-0.08
E	20.47	18.86	29.77	28.06	28.33	26.68	28.67	26.95	29.39	27.31	27.66	25.08		20.47	18.86	2.2	0.38
F	21.87	19.06	29.93	27.41	28.69	27.17	27.8	26.16	30.06	27.7	28.8	26.53		21.87	19.06	3.6	0.44
G	24.49	19.37	28.68	26.94	28.9	25.88	28.71	27.37	28.5	27.03	28.52	27.25		24.49	19.37	5.91	0.25
H	29.09	19.96	28.89	27.13	29.4	27.51	29.71	26.85	29.13	27.5	29.08	26.96		29.09	19.96	9.85	1.65
Measurement count: 20 Ex: 485 Em: 527 Scaling Factor : 1/1
	1	2	3	4	5	6	7	8	9	10	11	12
A	18.84	19.07	27.9	26.67	29.56	28.19	28.65	27.42	28.75	27.45	29.3	26.95		18.84	19.07	0.56	-0.96
B	19.27	18.65	28.45	26.93	29.09	27.86	29.49	27.67	28.83	27.21	28.54	25.98		19.27	18.65	1.25	-2.43
C	19.24	18.7	29	28.23	28.21	25.69	28.69	27.1	28.74	27.16	28.73	26.92		19.24	18.7	1.17	0.24
D	20.28	18.41	28.97	27.21	28.62	26.92	28.5	26.87	28.38	27.47	28.65	27.85		20.28	18.41	2.27	-0.02
E	20.59	18.85	29.31	27.58	28.17	26.56	28.48	26.92	29.15	27.04	27.61	24.89		20.59	18.85	2.32	0.37
F	22.08	19.05	29.55	27.32	28.48	27.03	27.69	26.03	29.6	27.56	28.67	26.42		22.08	19.05	3.81	0.43
G	24.97	19.33	28.4	26.85	28.71	25.67	28.46	26.97	28.44	26.49	28.21	27.01		24.97	19.33	6.39	0.21
H	29.55	19.92	28.73	26.99	29.09	27.46	29.55	26.7	28.89	27.25	28.86	26.71		29.55	19.92	10.31	1.61
Measurement count: 21 Ex: 485 Em: 527 Scaling Factor : 1/1
	1	2	3	4	5	6	7	8	9	10	11	12
A	18.95	19.17	28	26.74	30.09	28.57	29.31	27.76	29.03	27.61	29.85	27.11		18.95	19.17	0.67	-0.86
B	19.37	18.75	28.26	27.16	29.21	28.13	29.64	27.74	29.05	27.47	28.64	26.06		19.37	18.75	1.35	-2.33
C	19.41	18.81	29.29	28.5	28.57	25.92	28.79	27.03	28.92	27.37	28.61	27.09		19.41	18.81	1.34	0.35
D	20.08	18.45	29.48	27.43	28.64	27.08	28.66	26.96	28.69	27.56	28.94	28.04		20.08	18.45	2.07	0.02
E	20.91	18.96	29.76	27.68	28.24	26.8	28.5	27	28.71	27.18	27.67	25.25		20.91	18.96	2.64	0.48
F	22.54	19.21	29.4	27.45	28.67	27.09	27.84	25.22	29.69	27.65	28.74	26.54		22.54	19.21	4.27	0.59
G	25.66	19.58	28.95	26.74	27.99	25.83	28.52	27.14	28.59	26.68	28.4	26.94		25.66	19.58	7.08	0.46
H	30.28	20.28	28.68	27.1	29.01	27.54	29.63	26.72	29.11	27.37	28.69	26.79		30.28	20.28	11.04	1.97
[truncated: 6 more columns]
