# Supplementary material for: A crosstalk between hepcidin and IRE/IRP pathways controls ferroportin expression and determines serum iron levels in mice
Source: eLife. 2022 Sep 6;11:e81332. doi: 10.7554/eLife.81332 (PMC9499557; doi:10.7554/eLife.81332)
Supplement: Figure 8—source data 3. [file elife-81332-fig8-data3.xlsx]

## Sheet: 809 Serum
810_Serum_Updated_200121		5 weeks of diet
4x hepcidin injection. S.C. 0.5mg/ml injected 100ul/20g = 2.5ug/g
LPS 1ug/g
	Fe	mean	st				saturation	mean	st				ID
WT ND PBS	25	31.0909	4.50454				41	48.8182	7.12486
	26						46
	31						51
	33						52
	31						52
	37						57
	35						50
	28						38
	29						46
	39						62
	28						42
WtT ND LPS	11	9	1.29099				14	14.1429	1.21499
	9						16
	7						12
	9						15
	8						14
	9						14
	10						14
WT ND LPS+Hep	5	6	1				9	9.85714	1.06904
	8						12
	6						10
	6						10
	6						10
	6						9
	5						9
WT CID PBS	47	46	2				90	87.5	4.50252
	46						81
	47						94
	48						84
	46						90
	42						86
	47						90
	46						81
	47						94
	48						84
	46						90
	42						86
WT CID LPS	16	24.5714	7.0677				31	44	9.93311
	14						29
	27						51
	28						51
	31						50
	24						44
	32						52
WT CID LPS+Hep	11	15.1667	2.99444				21	27.6667	5.42832
	15						24
	13						25
	15						28
	19						33
	18						35
HJV ND PBS	49	55.5385	4.62989				91	86.2308	11.5481
	53						88
	58						75
	60						64
	54						69
	65						73
	55						92
	53						93
	53						95
	57						95
	62						95
	52						96
	51						95
HJV LPS		42.2	11.9248					66	16.4165
	58						68
	32						73
	34						56
	35						45
	52						88
HJV ND LPS+Hep	13	11.8571	3.67099				23	19.7143	4.53557
	13						21
	19						28
	11						17
	10						17
	8						16
	9						16
HJV IDD PBS	53	54.6	1.14018				91	94	2
	55
	56						95
	55						95
	54						95
HJV IDD PBS	56	55	6				82	84.6	2.88097
	52						87
	50						81
	65						86
	52						87
HJV IDD LPS+Hep	9	8.4	1.14018				16	14.2	2.04939
	7						11
	8						14
	8						14
	10						16
