# Supplementary material for: A crosstalk between hepcidin and IRE/IRP pathways controls ferroportin expression and determines serum iron levels in mice
Source: eLife. 2022 Sep 6;11:e81332. doi: 10.7554/eLife.81332 (PMC9499557; doi:10.7554/eLife.81332)
Supplement: Supplementary file 1. [file elife-81332-supp1.xlsx]

## Sheet: Sheet1
Table S1. List of primers used for qPCR.
Gene	GenBank accession	Forward primer sequence	Reverse primer sequence
Hamp1	NM_032541.1	AAGCAGGGCAGACATTGCGAT	CAGGATGTGGCTCTAGGCTATGT
Slc40a1(+IRE)	NM_016917.2	GGCATAAGGCTGTTGTGCTT	TCATGACACCAGGCGTTCTC
Slc40a1(-IRE)	XM_006496137.4	GCCGGTTGGAGTTTCAATGT	TCATGACACCAGGCGTTCTC
Slc11a2	NM_001146161.1	CTTGGGATACTGACGGTGAC	GATTTGCAGTCTGGAGCAGT
Slc39a14	NM_001135151.1	TGGATAGTGAGGCTGCGTGG	ATGGTGAGGCCAAGGCTAAT
Lcn2	NM_008491	GGCCAGTTCACTCTGGGAAA	TGGCGAACTGGTTGTAGTCC
Tfrc	NM_011638.4	AGCCAGATCAGCATTCTCTAACT	GCCTTCATGTTATTGTCGGCAT
Bmp6	NM_007556.2	ACTCGGGATGGACTCCACGTCA	CACCATGAAGGGCTGCTTGTCG
Id1	NM_010495.2	GGTACTTGGTCTGTCGGAGC	GCAGGTCCCTGATGTAGTCG
Socs3	NM_007707.3	TGCGCCTCAAGACCTTCAG	GCTCCAGTAGAATCCGCTCTC
Fth1	NM_010239.2	AAGTGCGCCAGAACTACCAC	AGCCACATCATCTCGGTCAA
Rpl19	NM_009078.2	AGGCATATGGGCATAGGGAAGAG	TTGACCTTCAGGTACAGGCTGTG
Actb	NM_007393.3	GACGACATGGAGAAGATCTG	GTGAAGCTGTAGCCACGCTC
